# Supplementary material for: Unusual participation of O-propargyl group during the cyclization of 6-hydroxy-2-propargyl ethers of aryl chalcones: one-pot synthesis of 2-acyl-3-styrylbenzofuran and 7-aryldibenzo[b,d]furan-1,7-diols
Source: Royal Society of Chemistry journal article supplement (doi:10.1039/d3nj03766e), 2023-01-01
Supplement: d3nj03766e1.pdf [file d3nj03766e1.pdf]

**Unusual participation of *O*-propargyl group during cyclization of 6-hydroxy-2-propargyl ethers of aryl chalcones: One-pot synthesis of 2-acyl-3-styrylbenzofuran and 7-aryldibenzo[*b,d*]furan-1,7-diols**

**Arimalai Dinakararaja Samyuktha<sup>a</sup>, Kannatt Radhakrishnan Ethiraj<sup>a\*</sup>, and Ponnusamy Shanmugam<sup>b\*</sup>**

<sup>a</sup>Department of Chemistry, School of Advanced Sciences, VIT, Vellore-632014, India,  
Email: [krethiraj@vit.ac.in](mailto:krethiraj@vit.ac.in)

<sup>b</sup>Organic and Bioorganic Chemistry Division, CSIR-Central Leather Research Institute (CLRI), Adyar, Chennai-600020, India; Email: [shanmu196@rediffmail.com](mailto:shanmu196@rediffmail.com)

**Content**

1. Scanned copies of spectra (<sup>1</sup>H and <sup>13</sup>C NMR, DEPT-135, FTIR, HRMS)
2. Basic crystallographic data for compounds **6f**, **7d**, and **20**.

4. Scanned copies of spectra ( $^1\text{H}$  and  $^{13}\text{C}$  NMR, DEPT-135, FTIR, HRMS)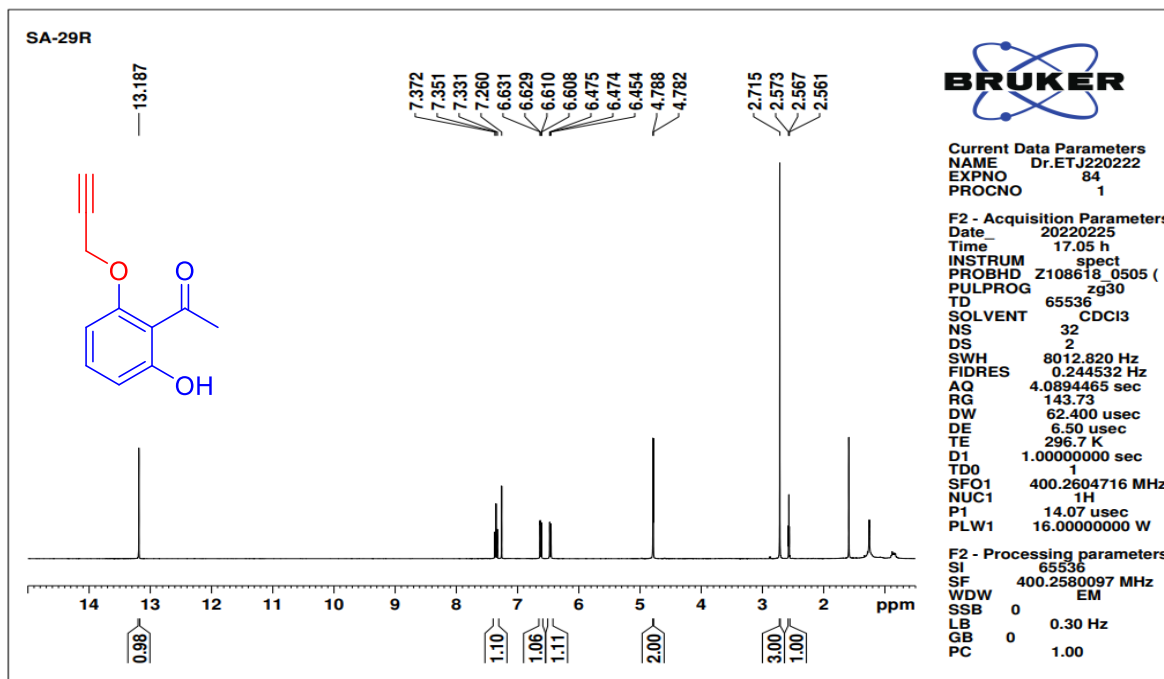Figure 1:  $^1\text{H}$  NMR spectrum of compound 3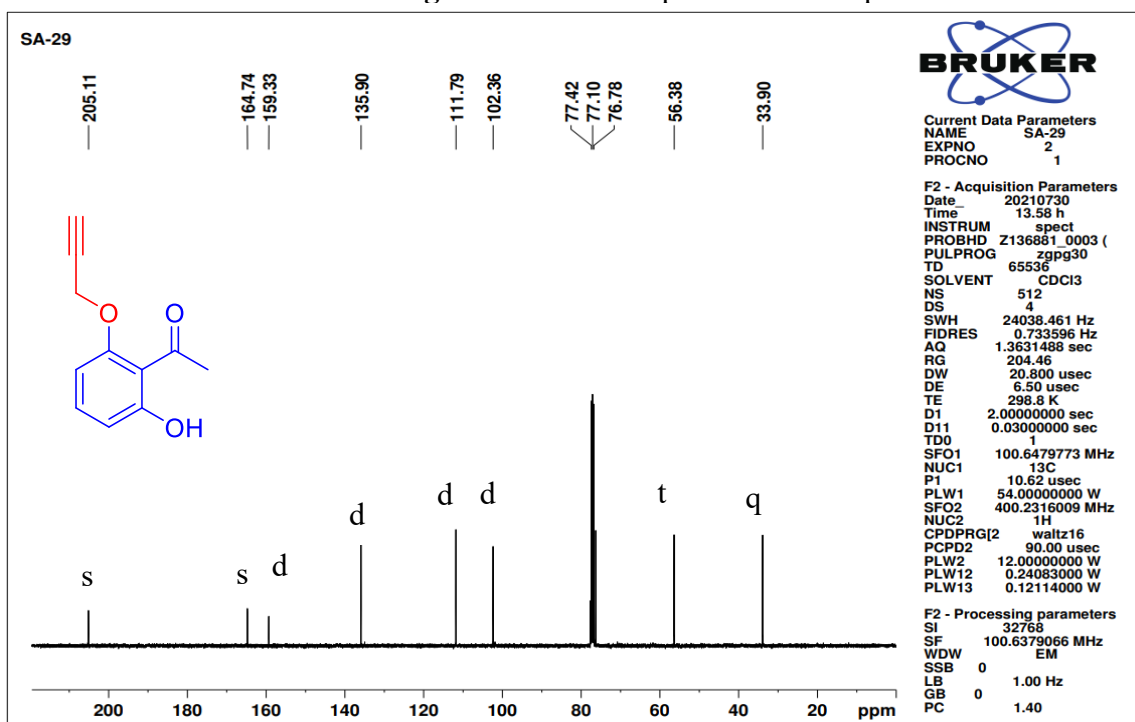Figure 2:  $^{13}\text{C}$  NMR spectrum of compound 3

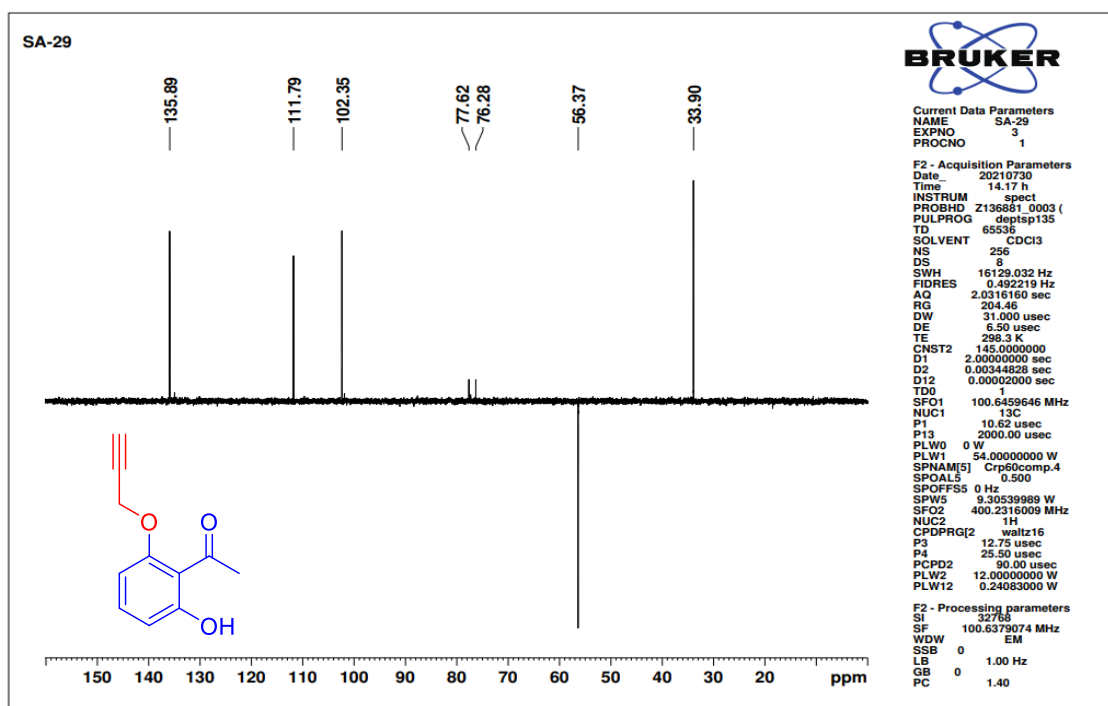

Figure 3: DEPT-135 NMR spectrum of compound 3

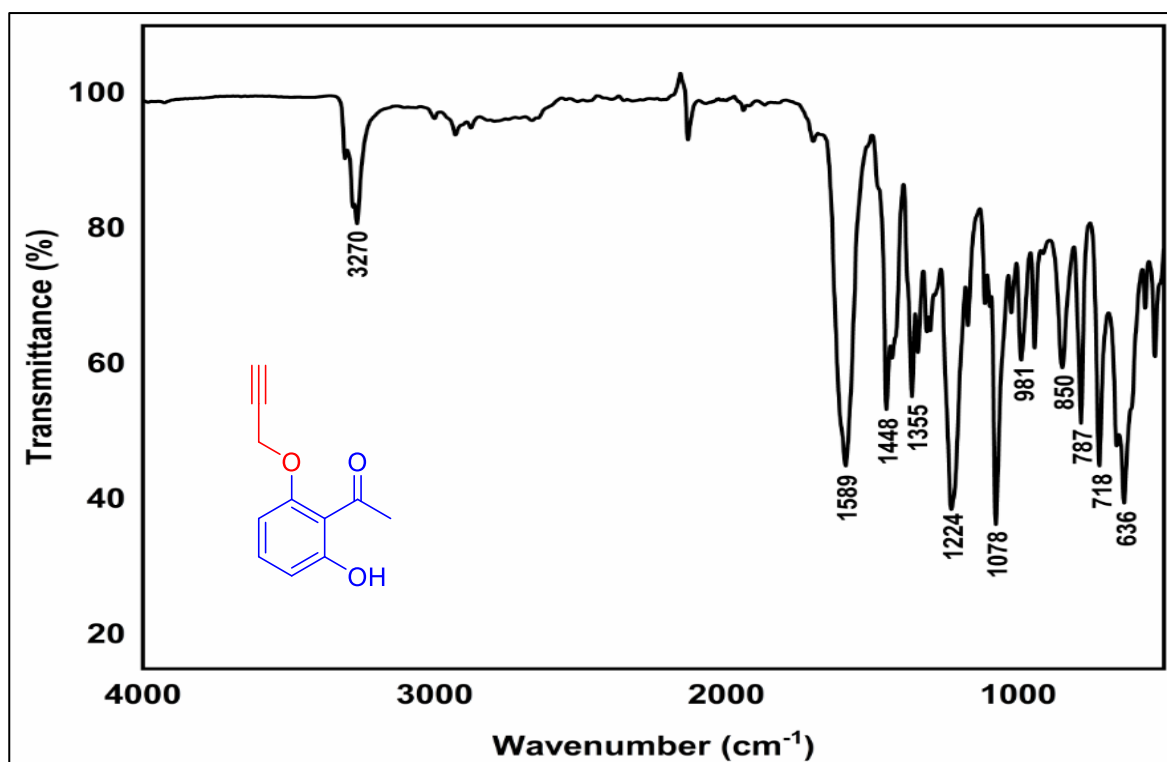

Figure 4: FT-IR spectrum of compound 3

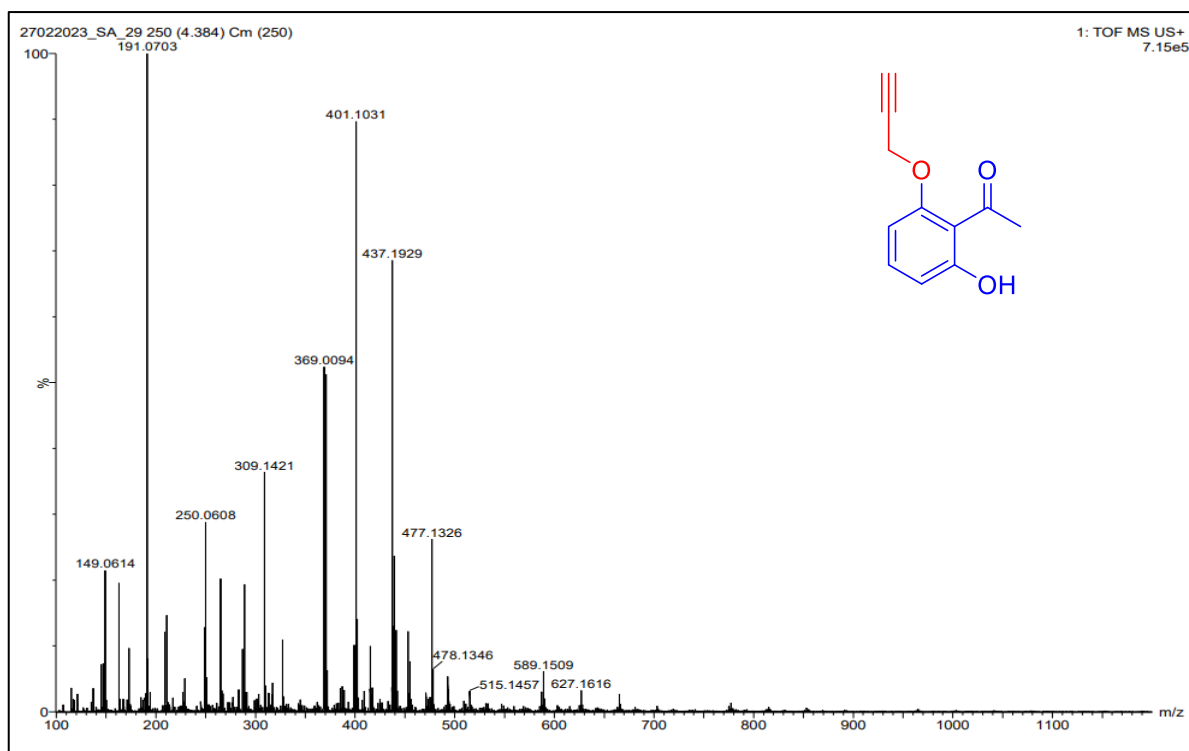

Figure 5: HRMS spectrum of compound 3

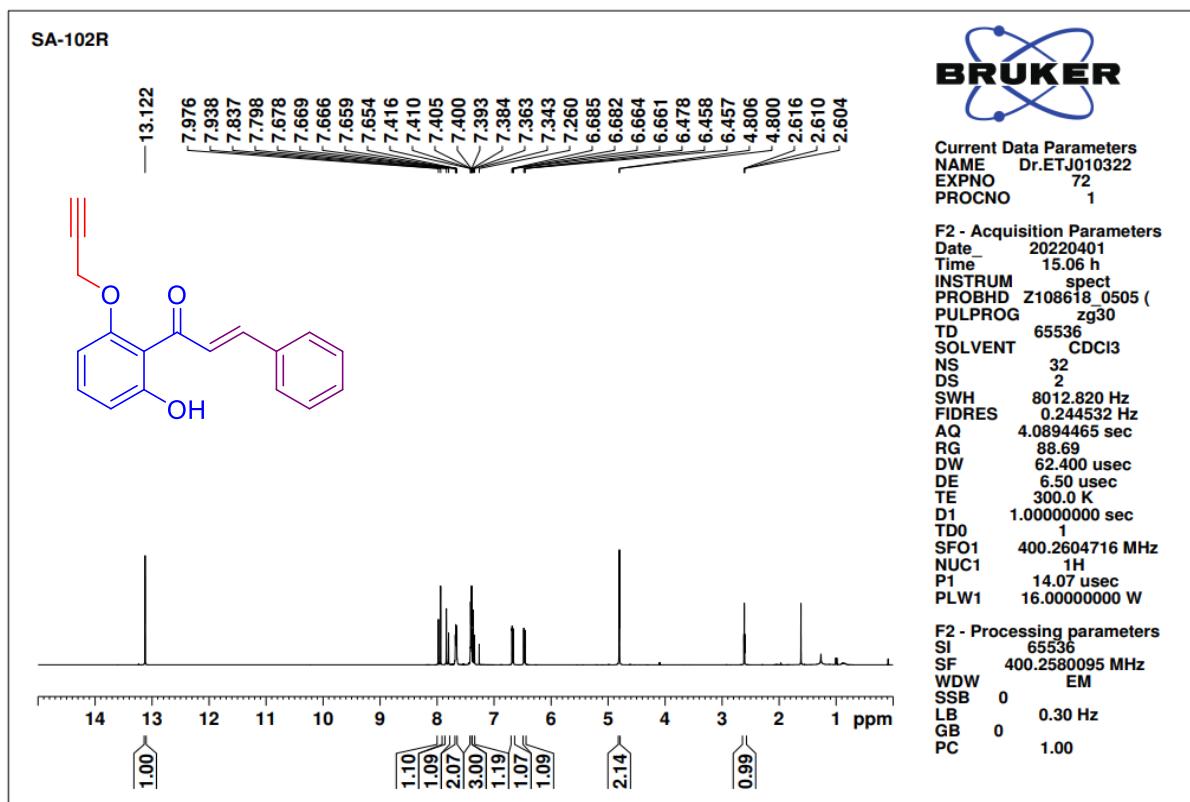Figure 6: <sup>1</sup>H NMR spectrum of compound 5a

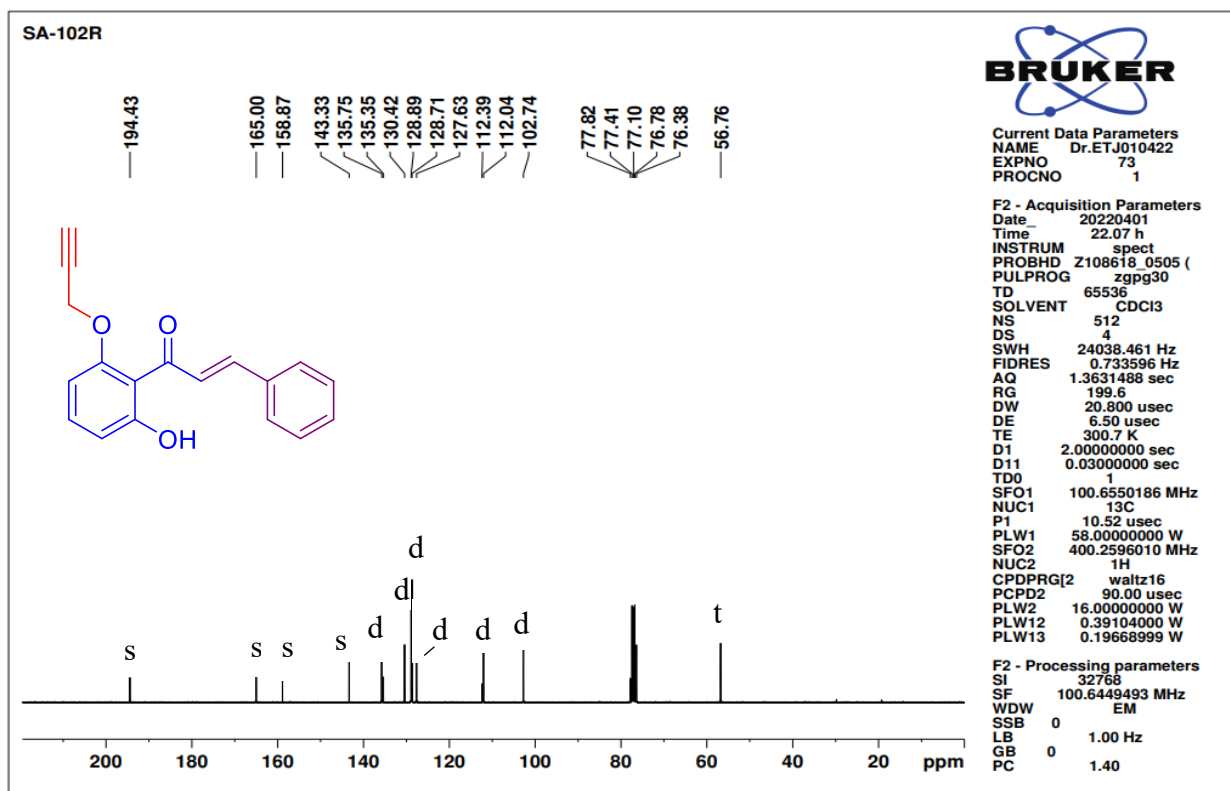Figure 7:  $^{13}\text{C}$  NMR spectrum of compound 5a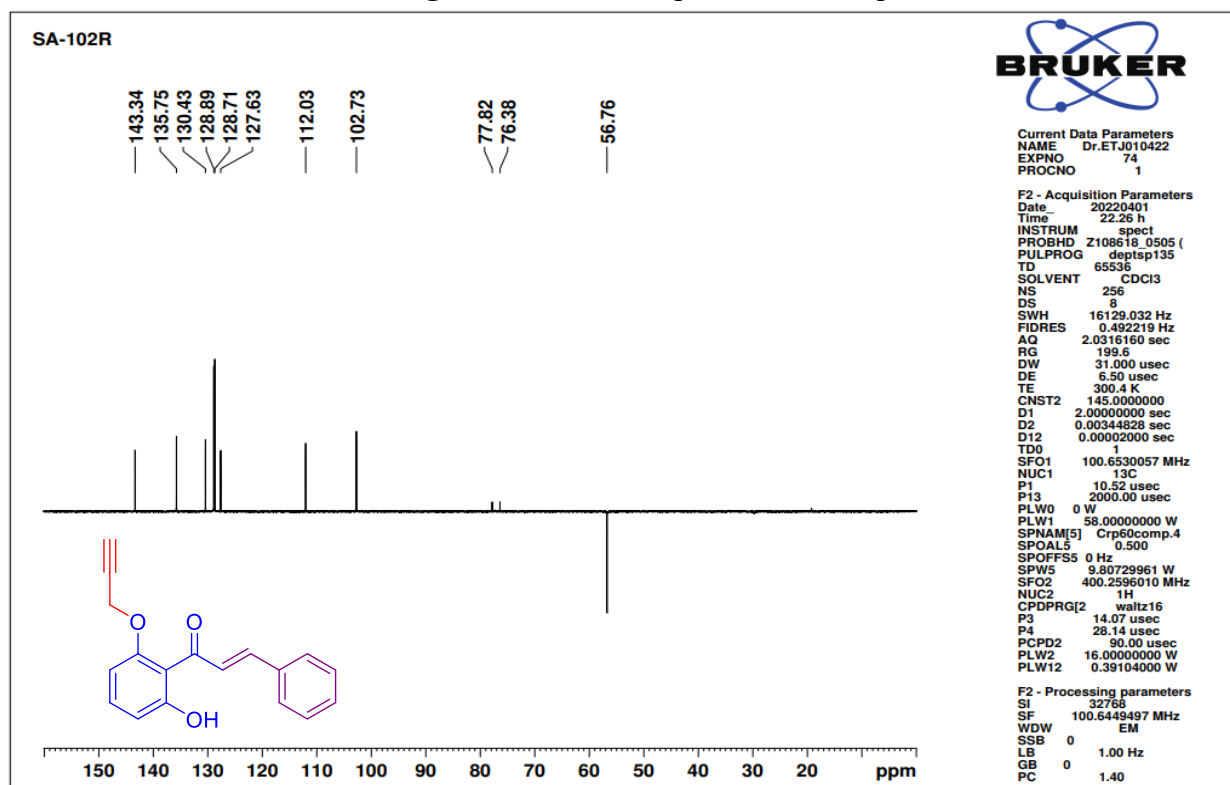

Figure 8: DEPT-135 NMR spectrum of compound 5a

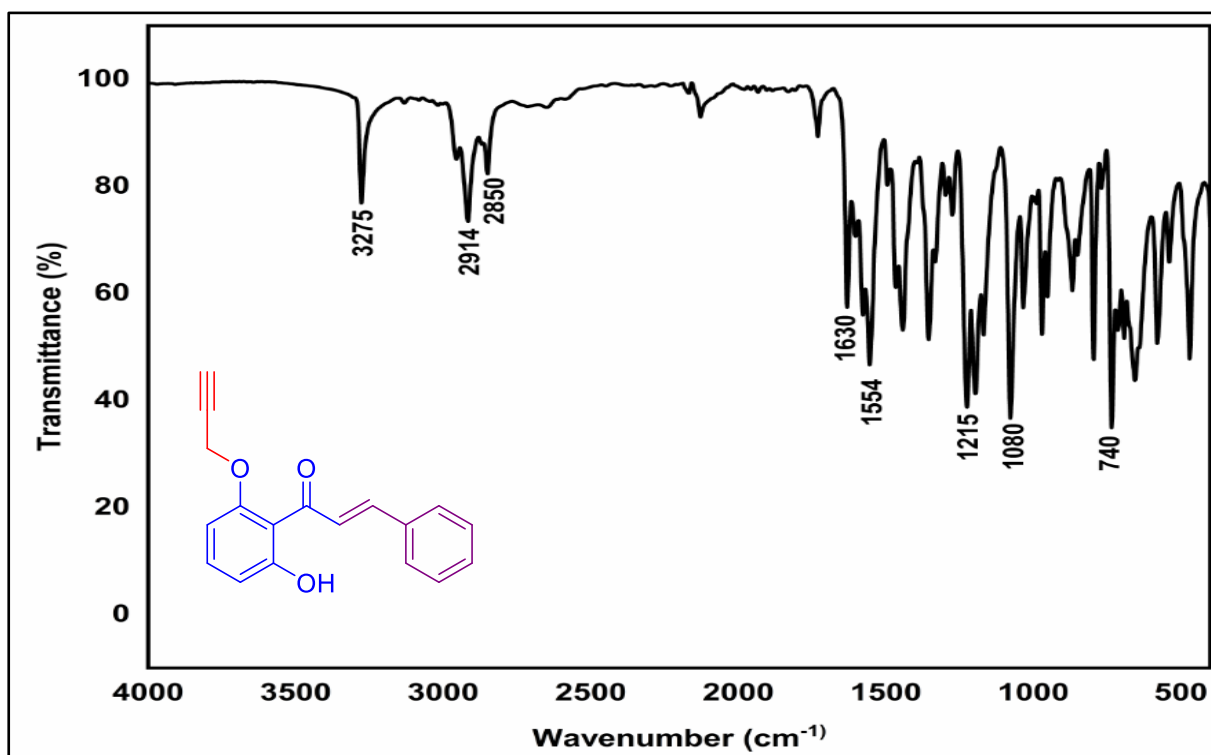

Figure 9: FT-IR spectrum of compound 5a

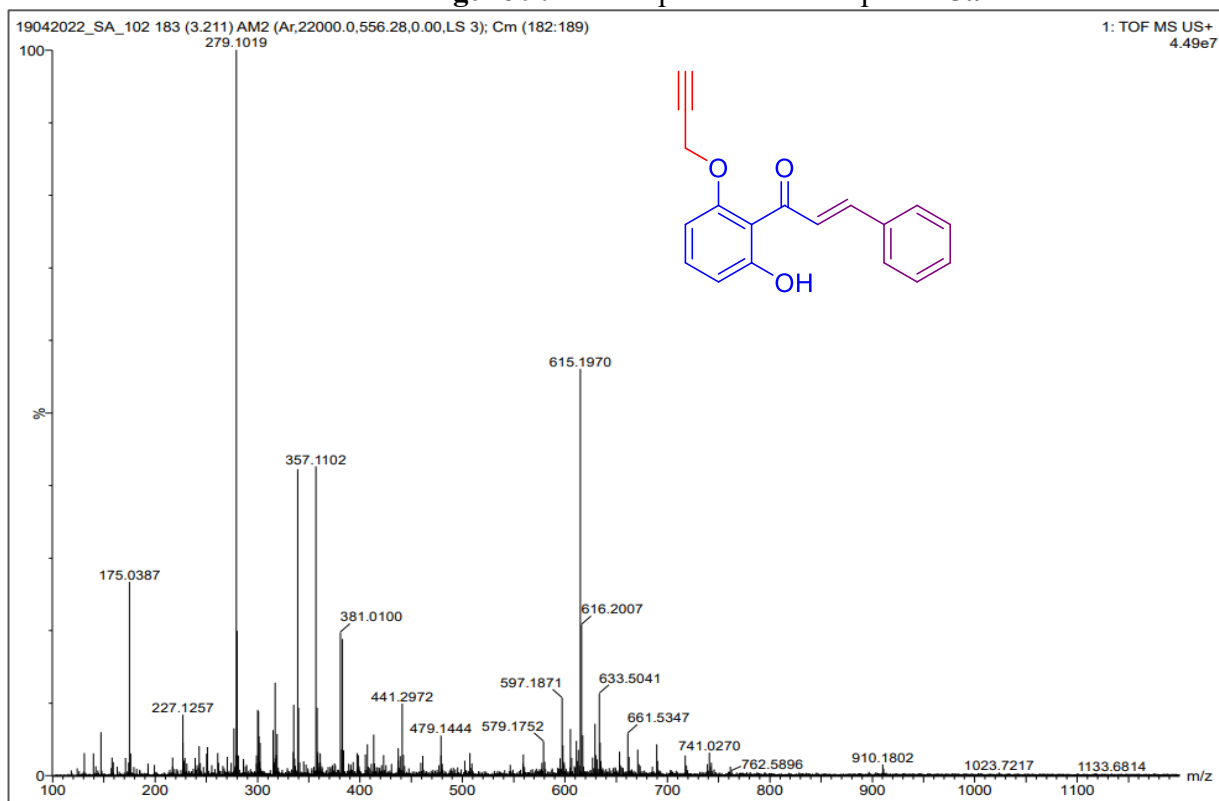

Figure 10: HRMS spectrum of compound 5a

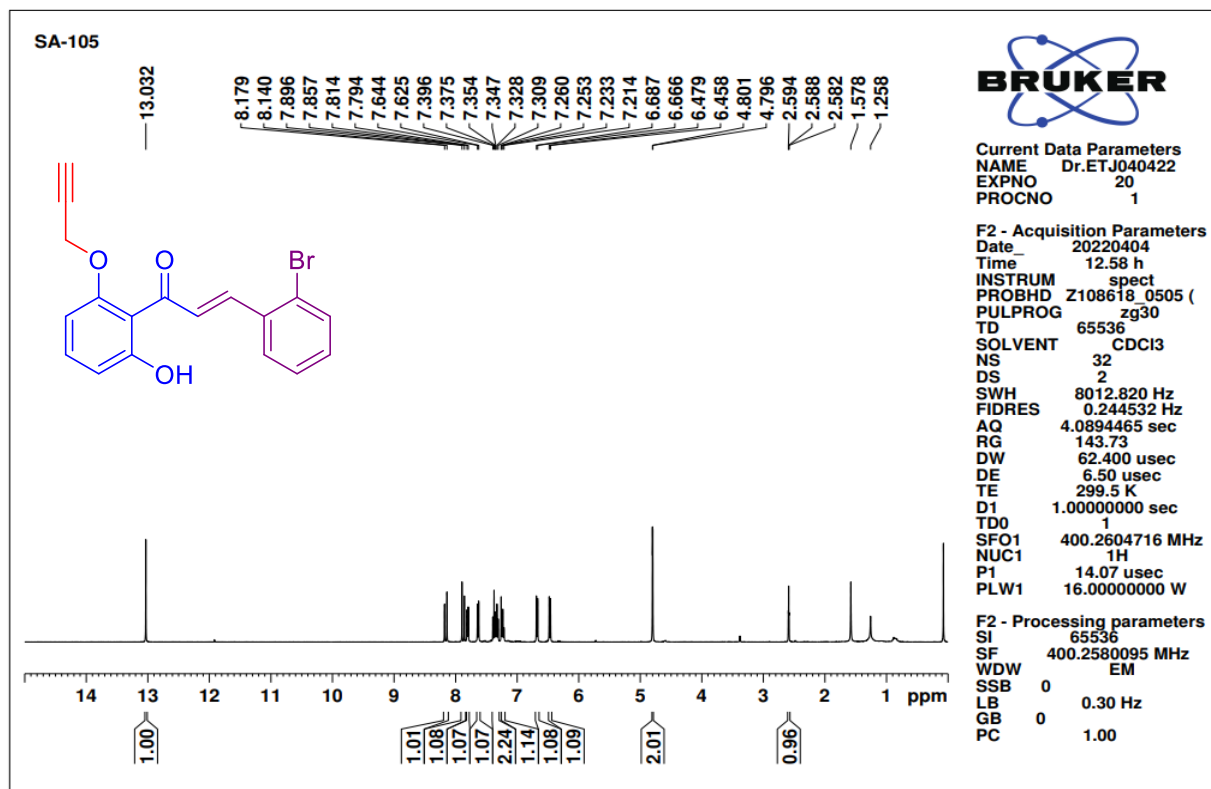Figure 11:  $^1\text{H}$  NMR spectrum of compound 5b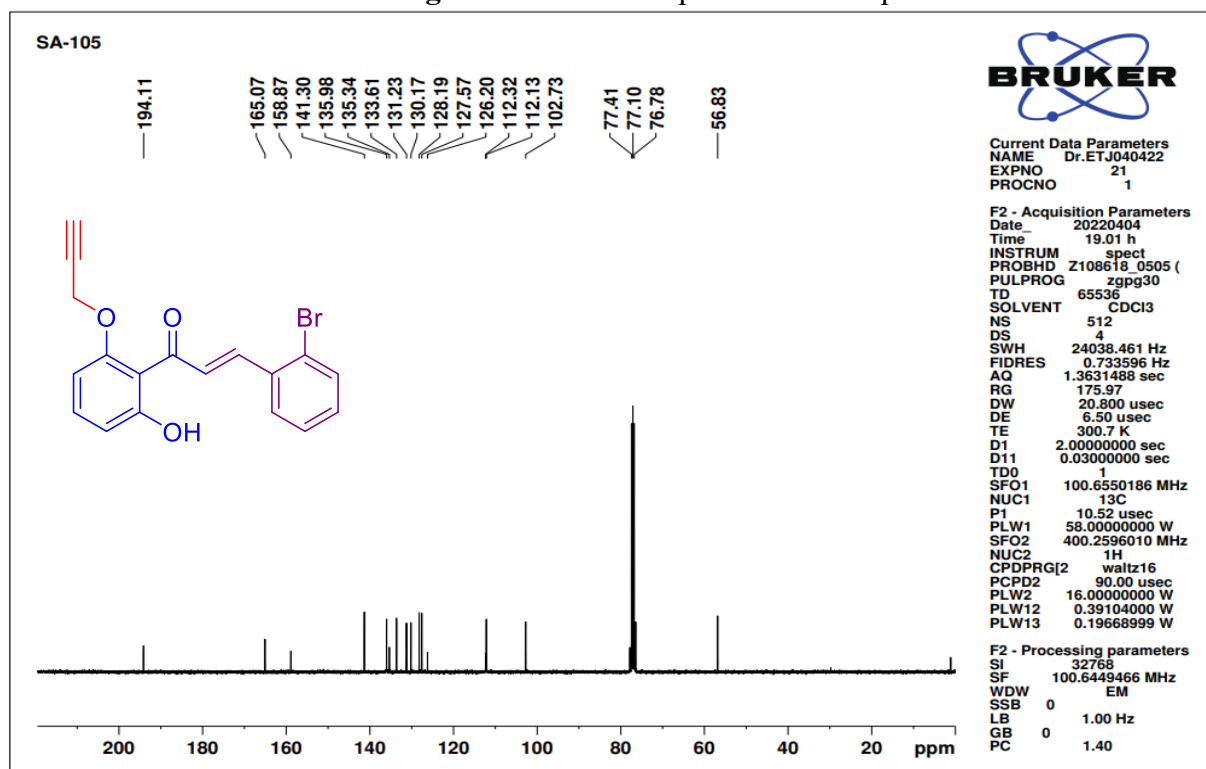Figure 12:  $^{13}\text{C}$  NMR spectrum of compound 5b

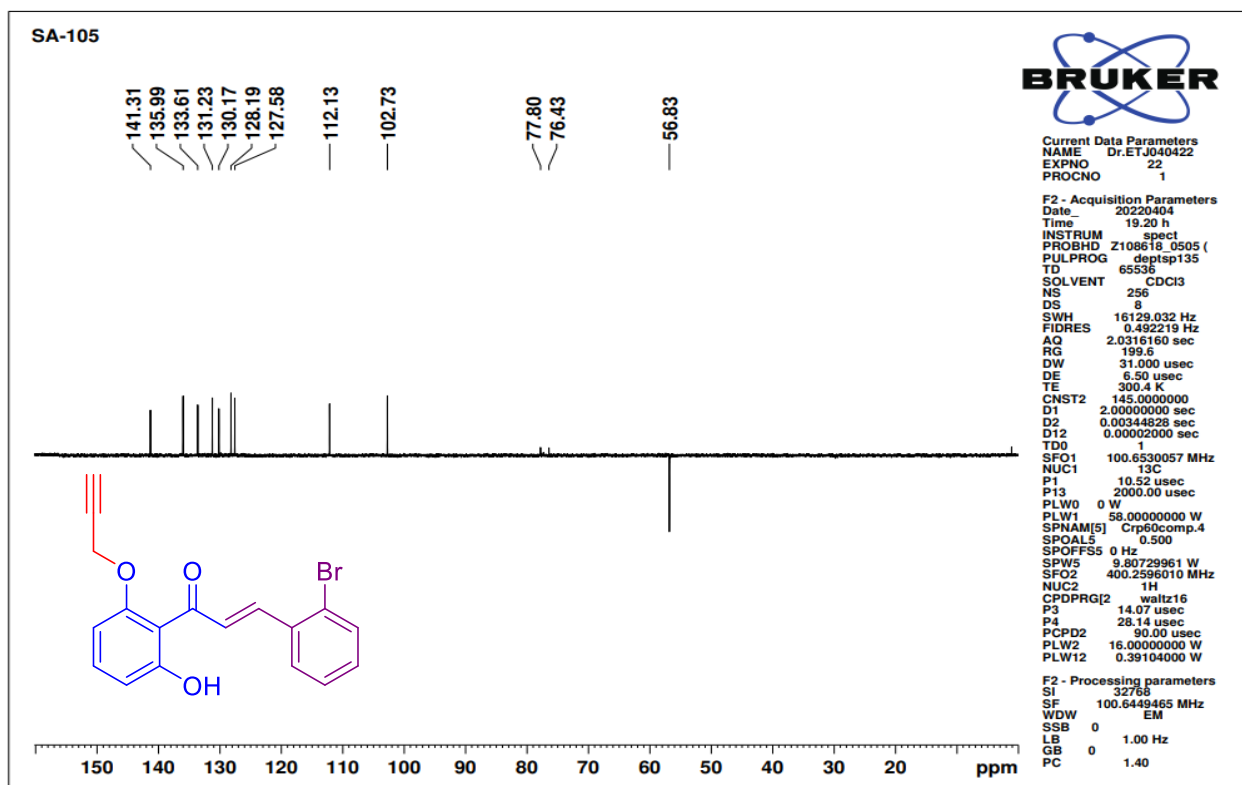

Figure 13: DEPT-135 NMR spectrum of compound 5b

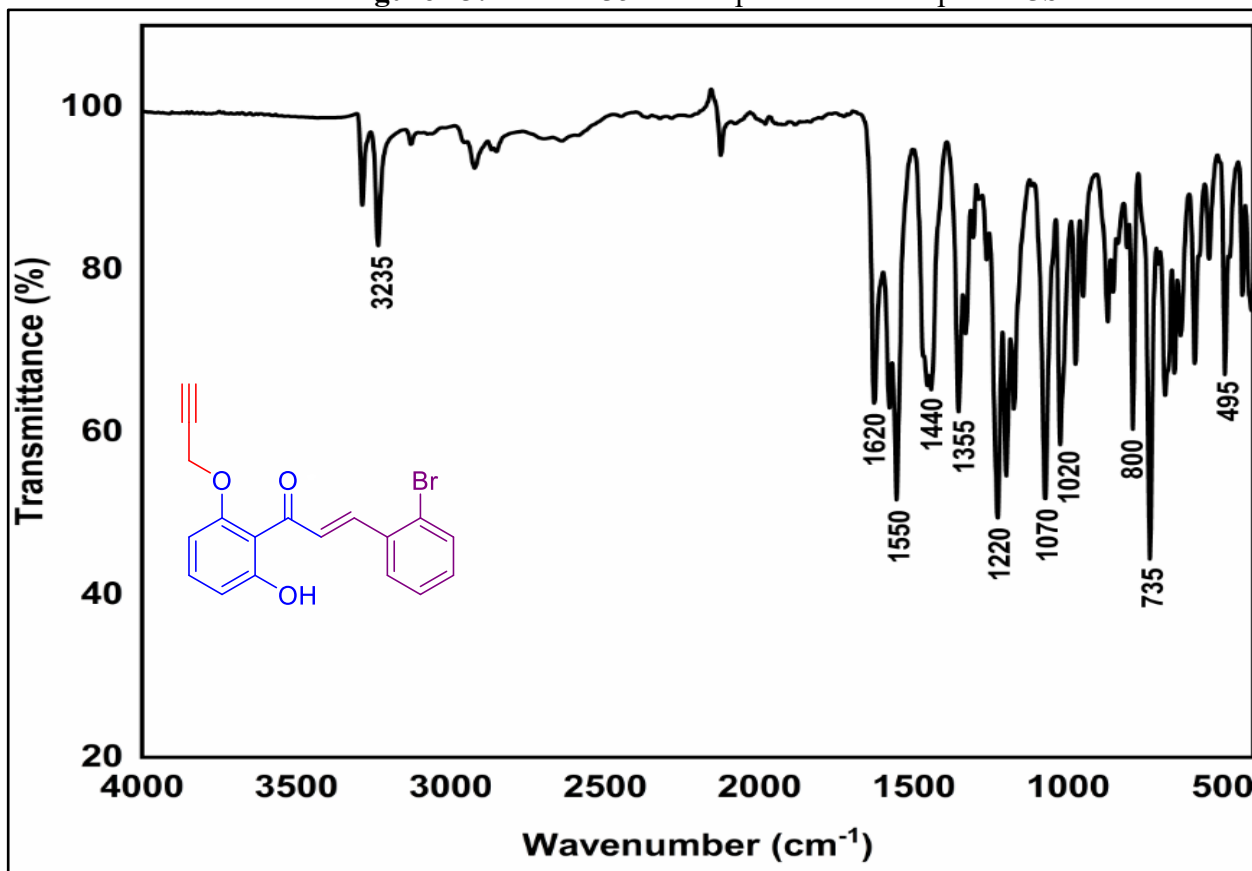

Figure 14: FT-IR spectrum of compound 5b



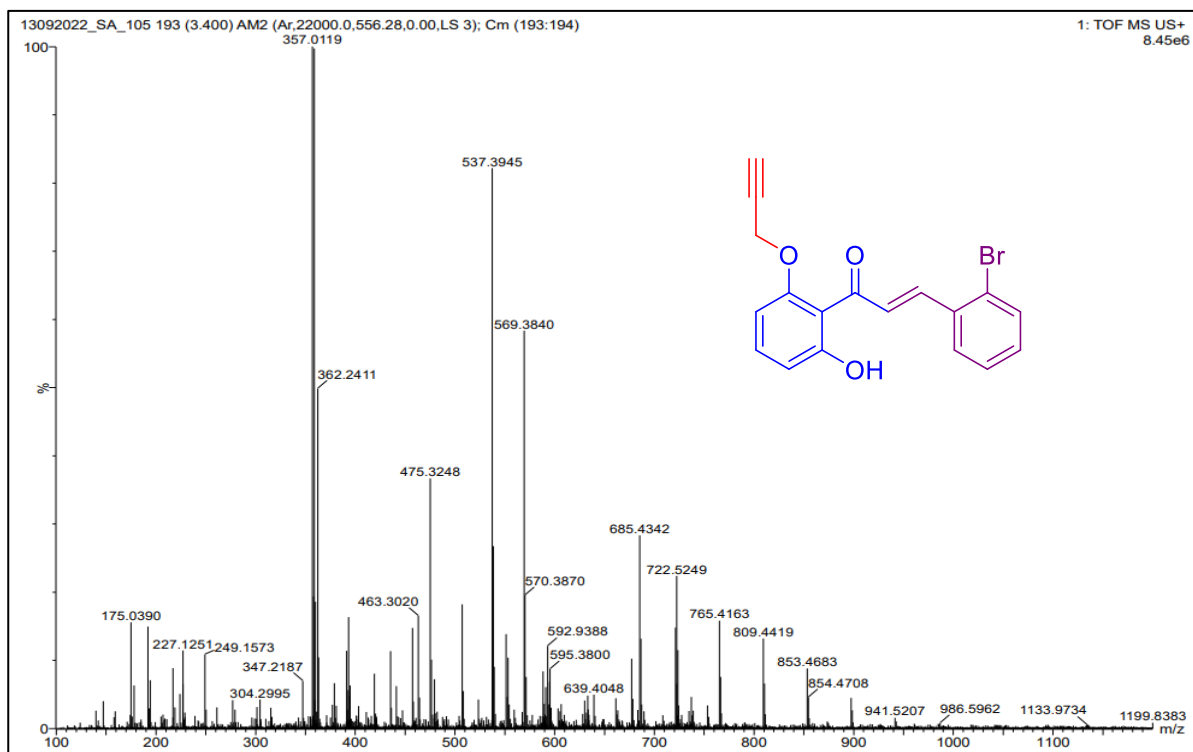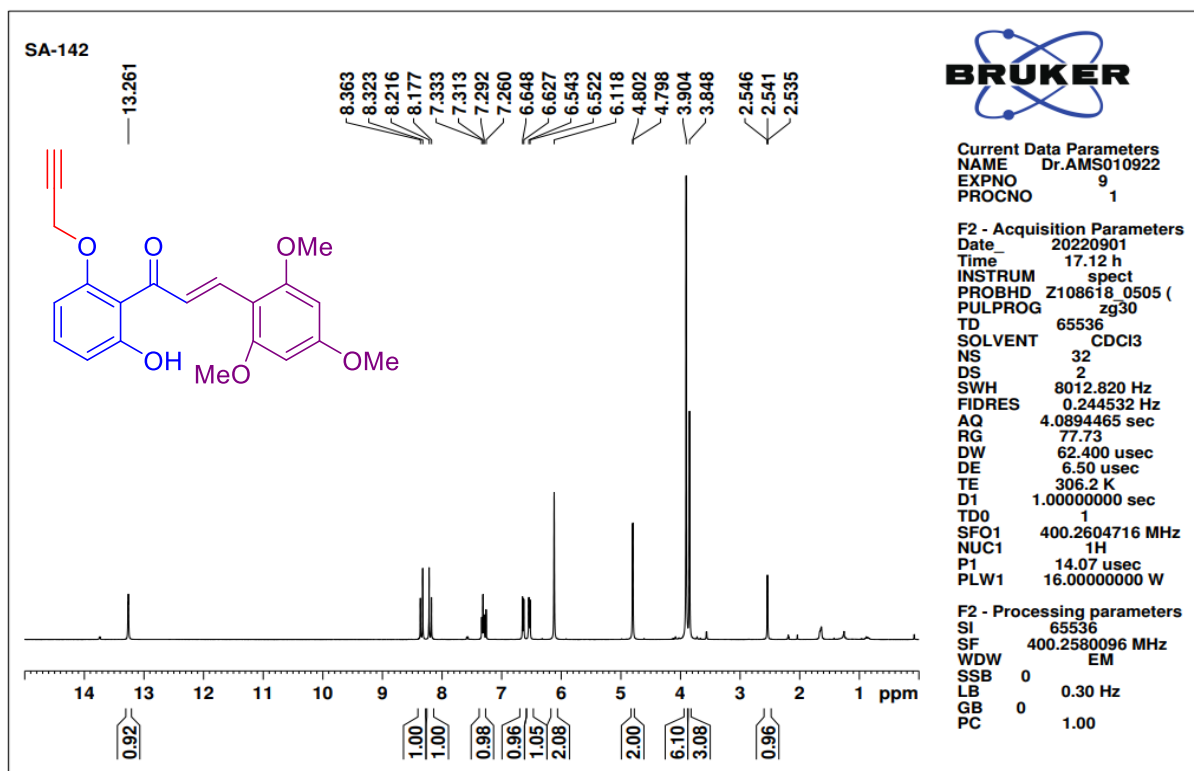

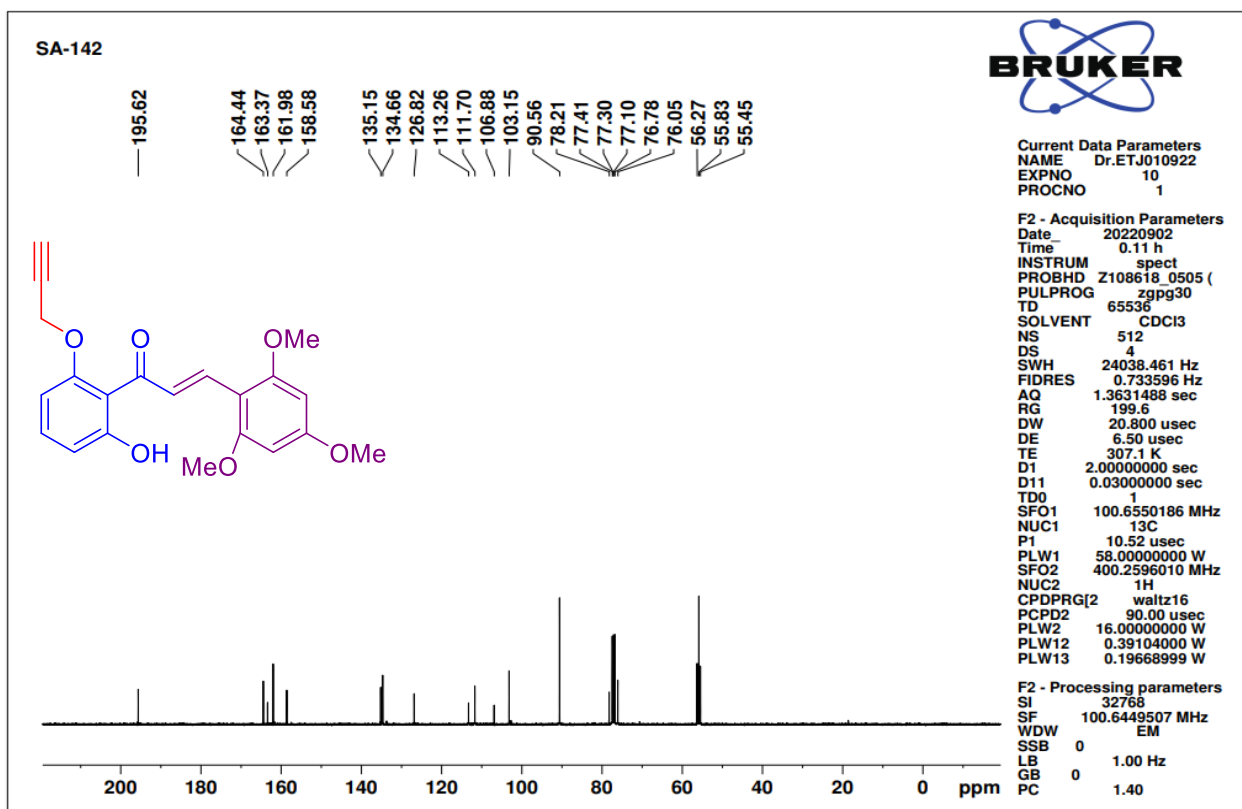Figure 17:  $^{13}\text{C}$  NMR spectrum of compound 5c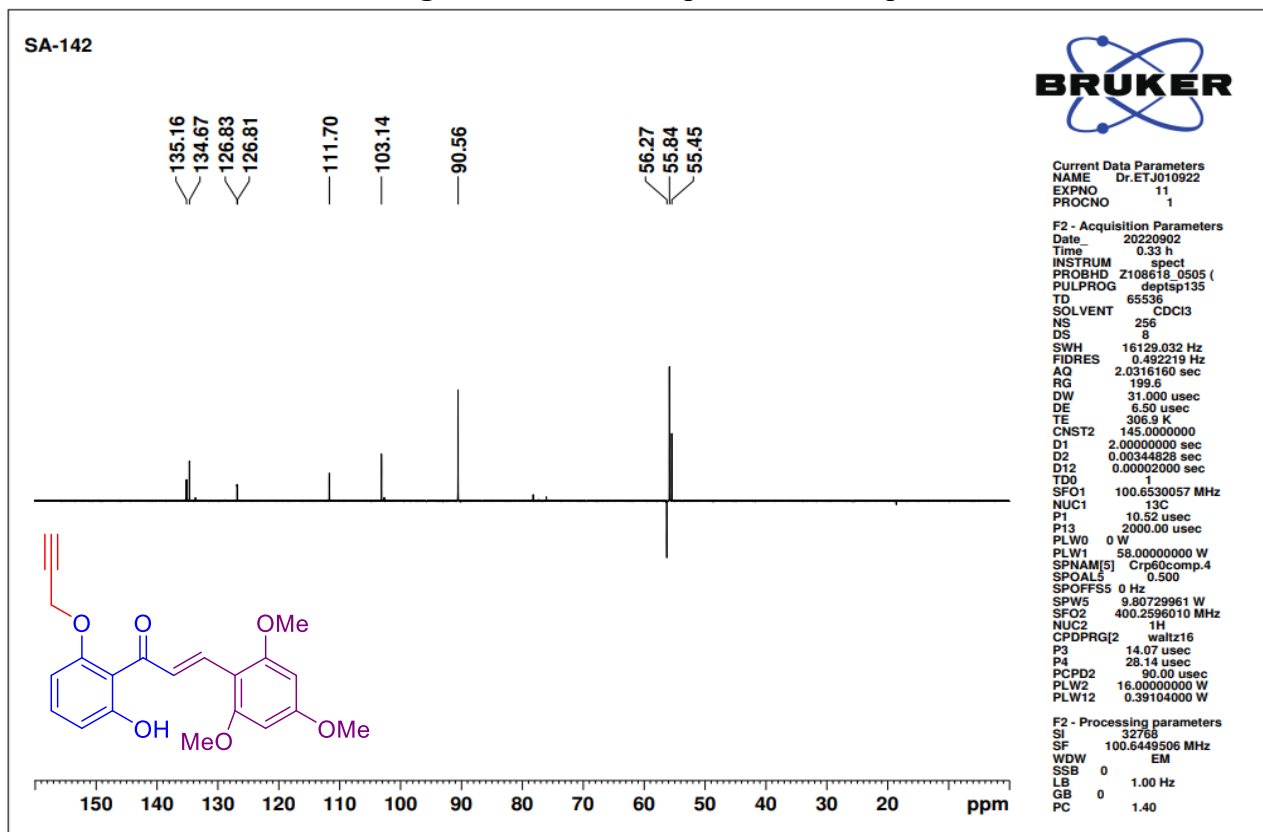

Figure 18: DEPT-135 NMR spectrum of compound 5c

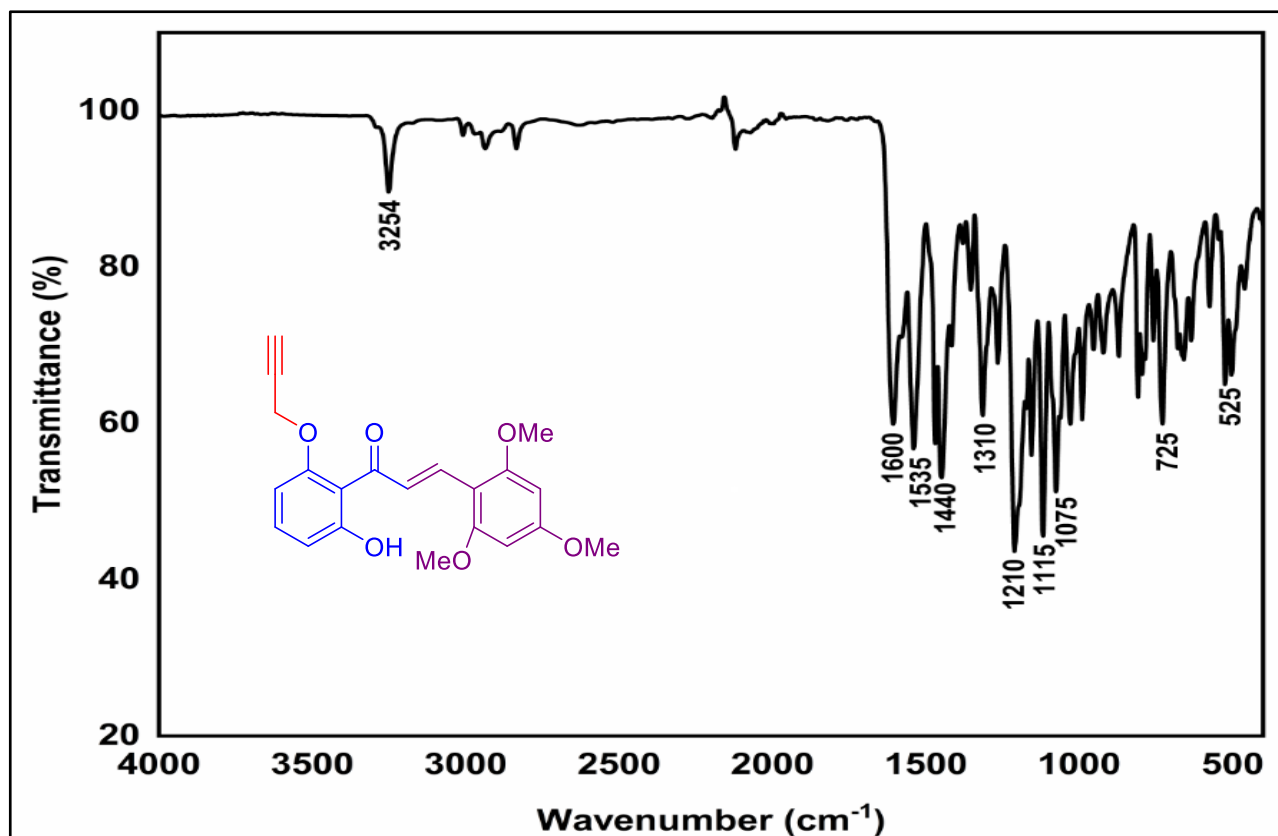

Figure 19: FT-IR spectrum of compound 5c

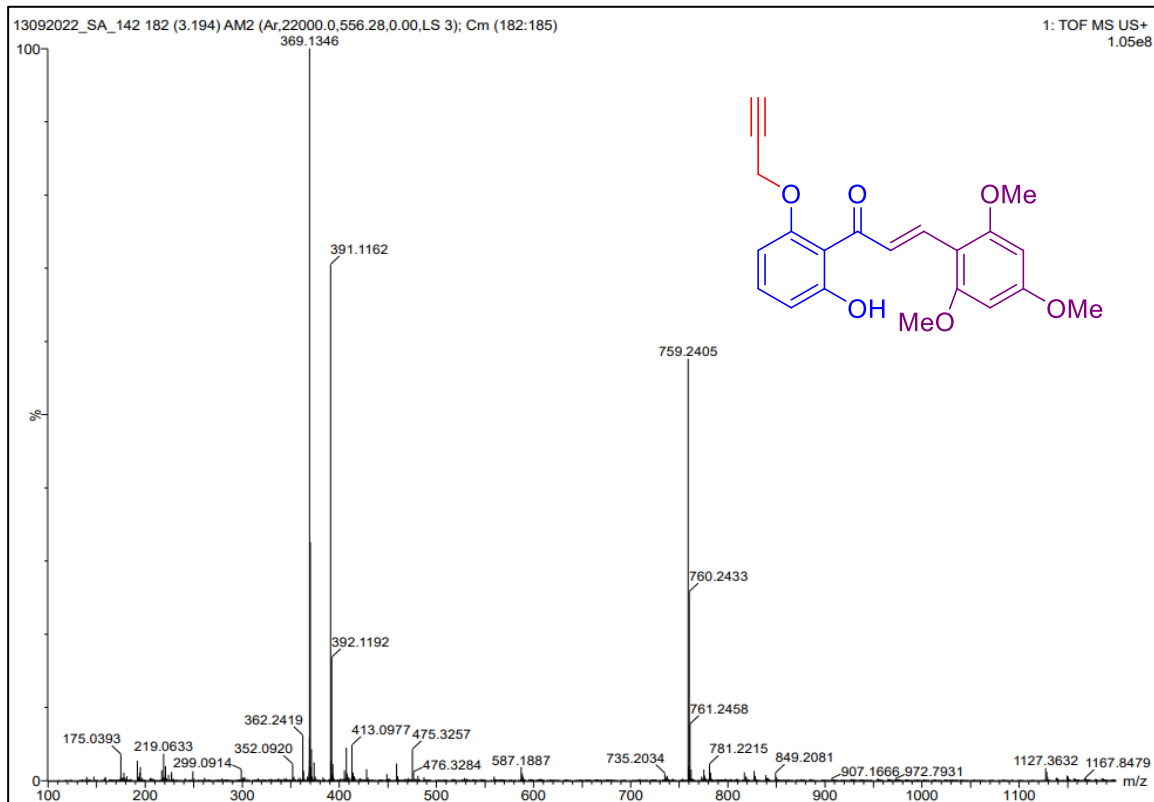

Figure 20: HRMS spectrum of compound 5c

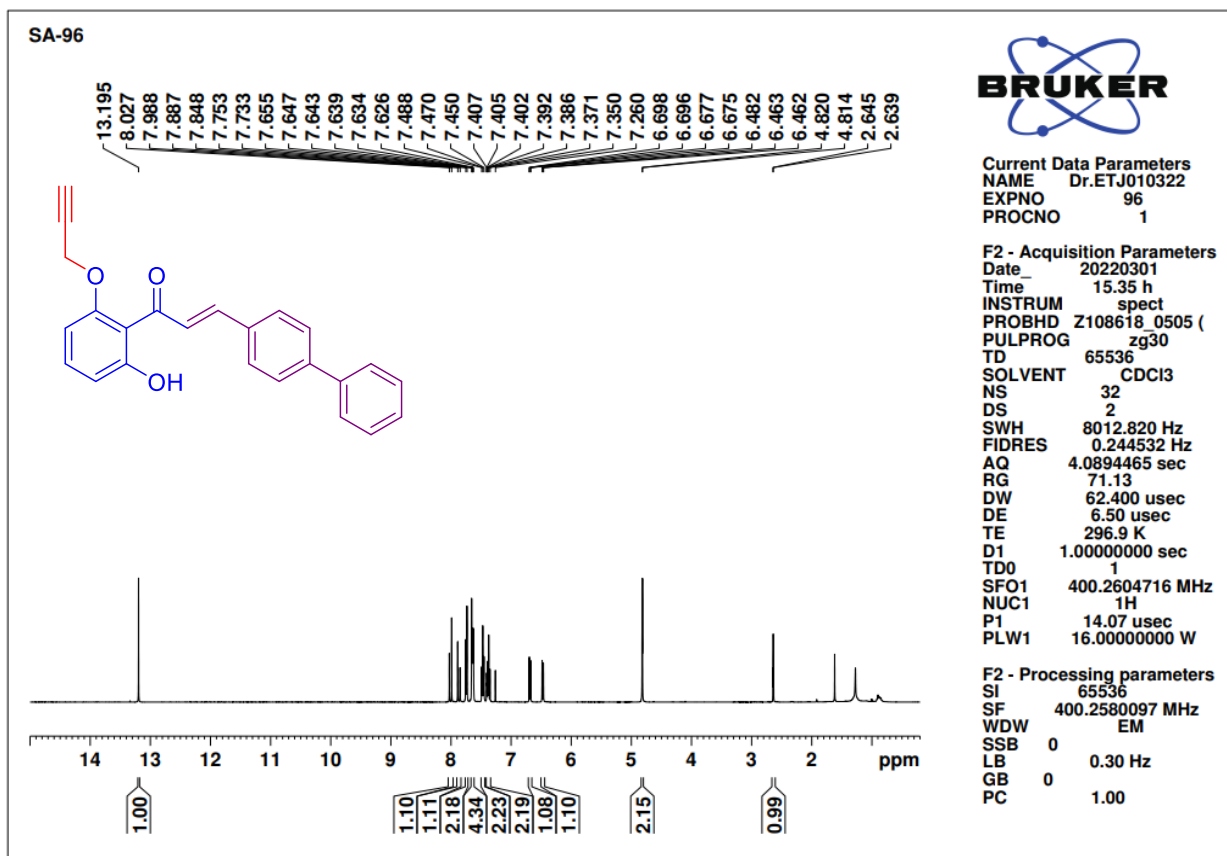Figure 21:  $^1\text{H}$  NMR spectrum of compound 5d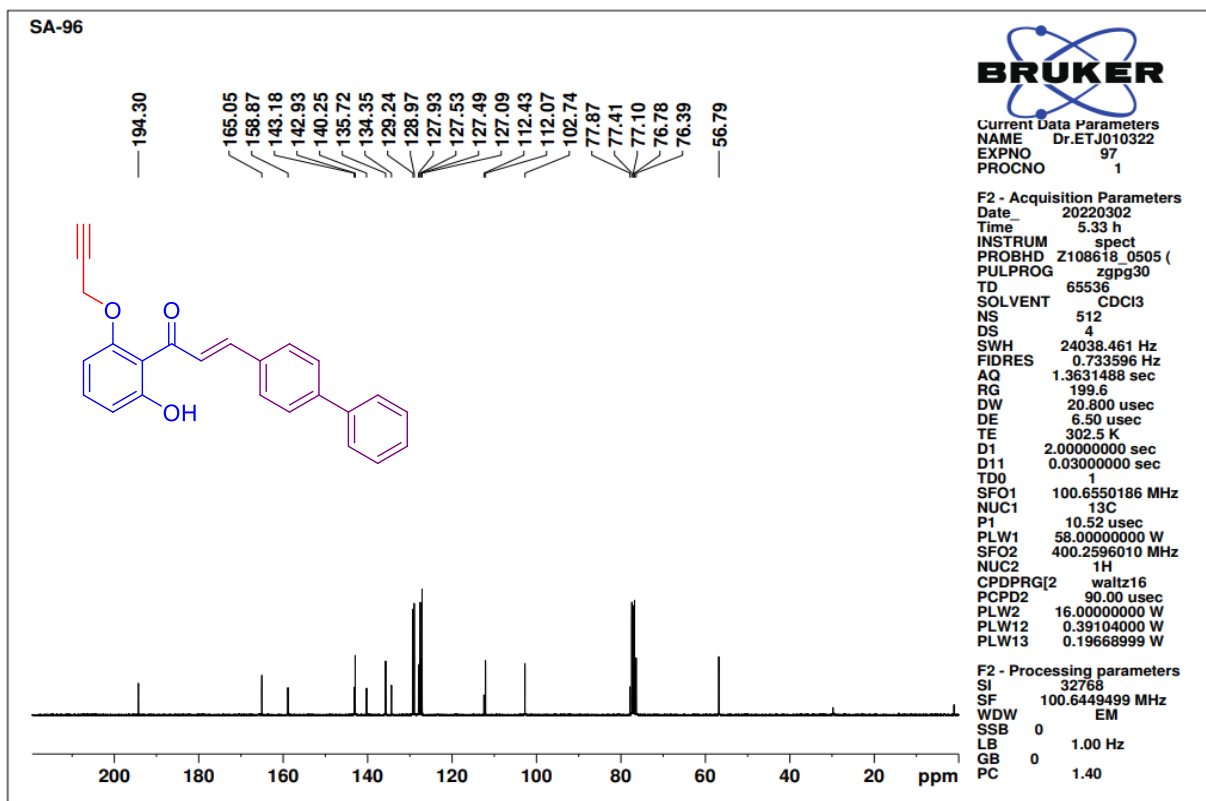Figure 22:  $^{13}\text{C}$  NMR spectrum of compound 5d

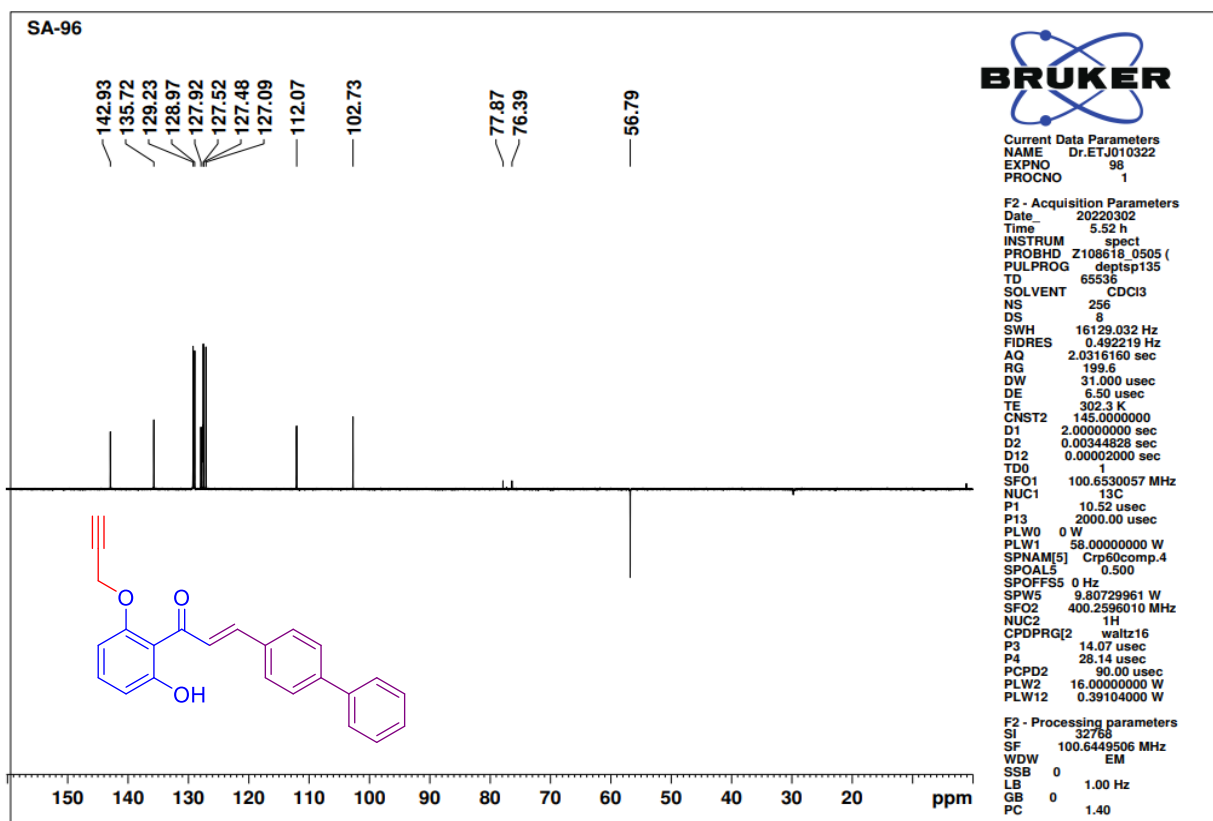

Figure 23: DEPT-135 NMR spectrum of compound 5d

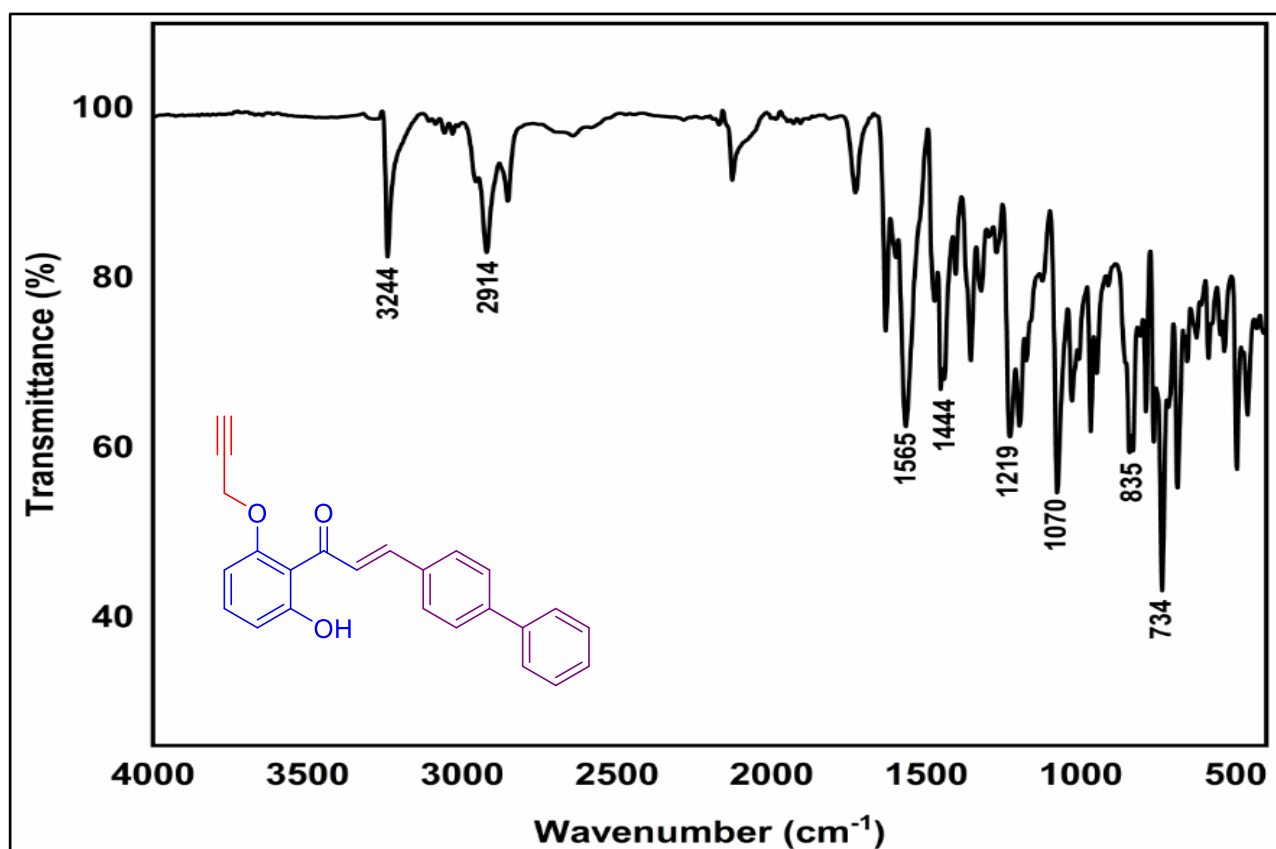

Figure 24: FT-IR spectrum of compound 5d

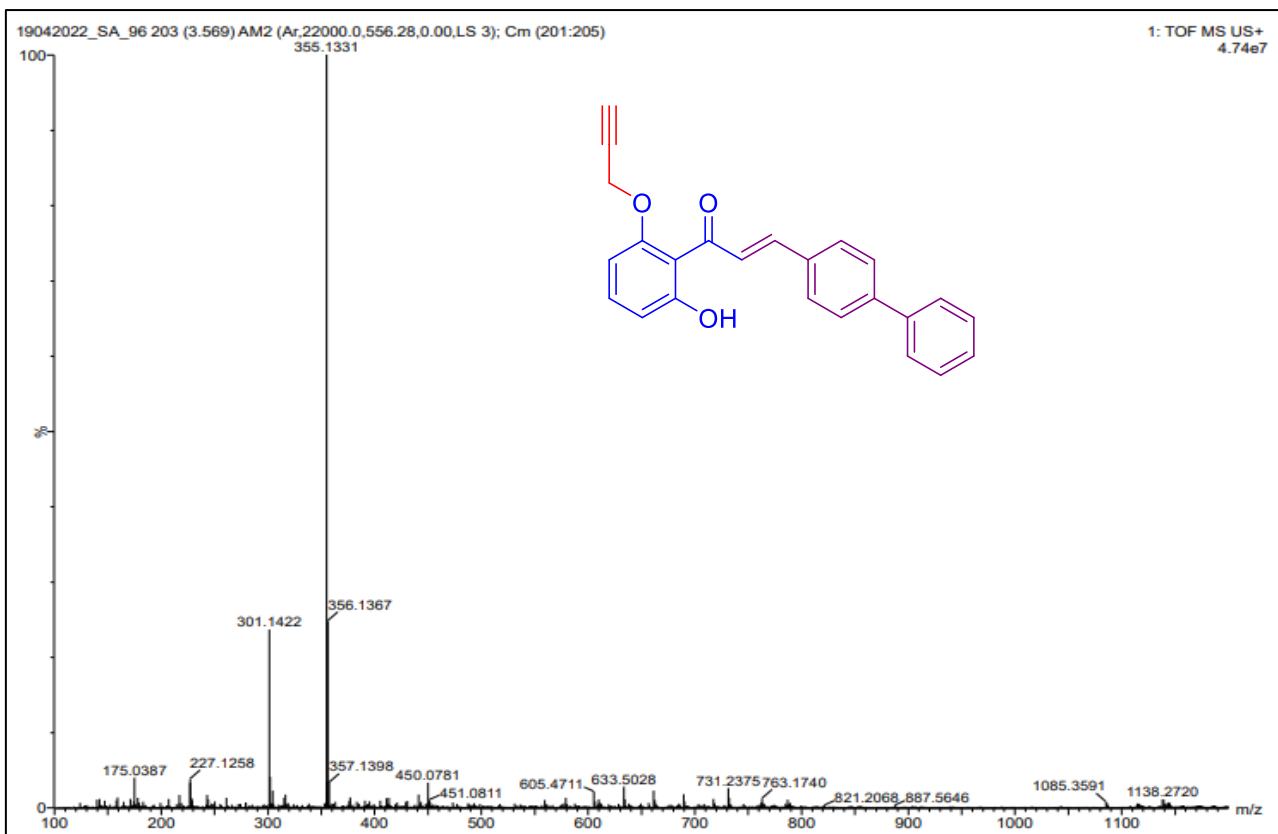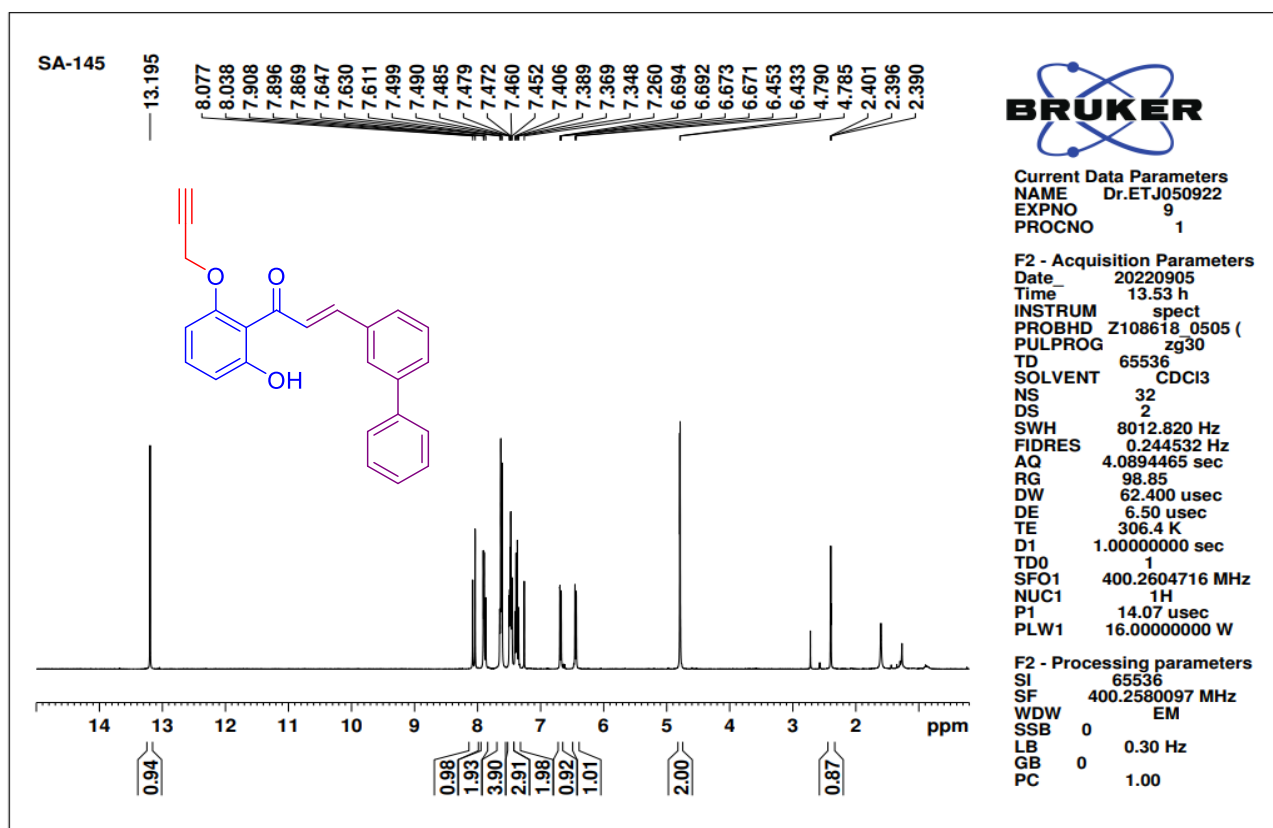

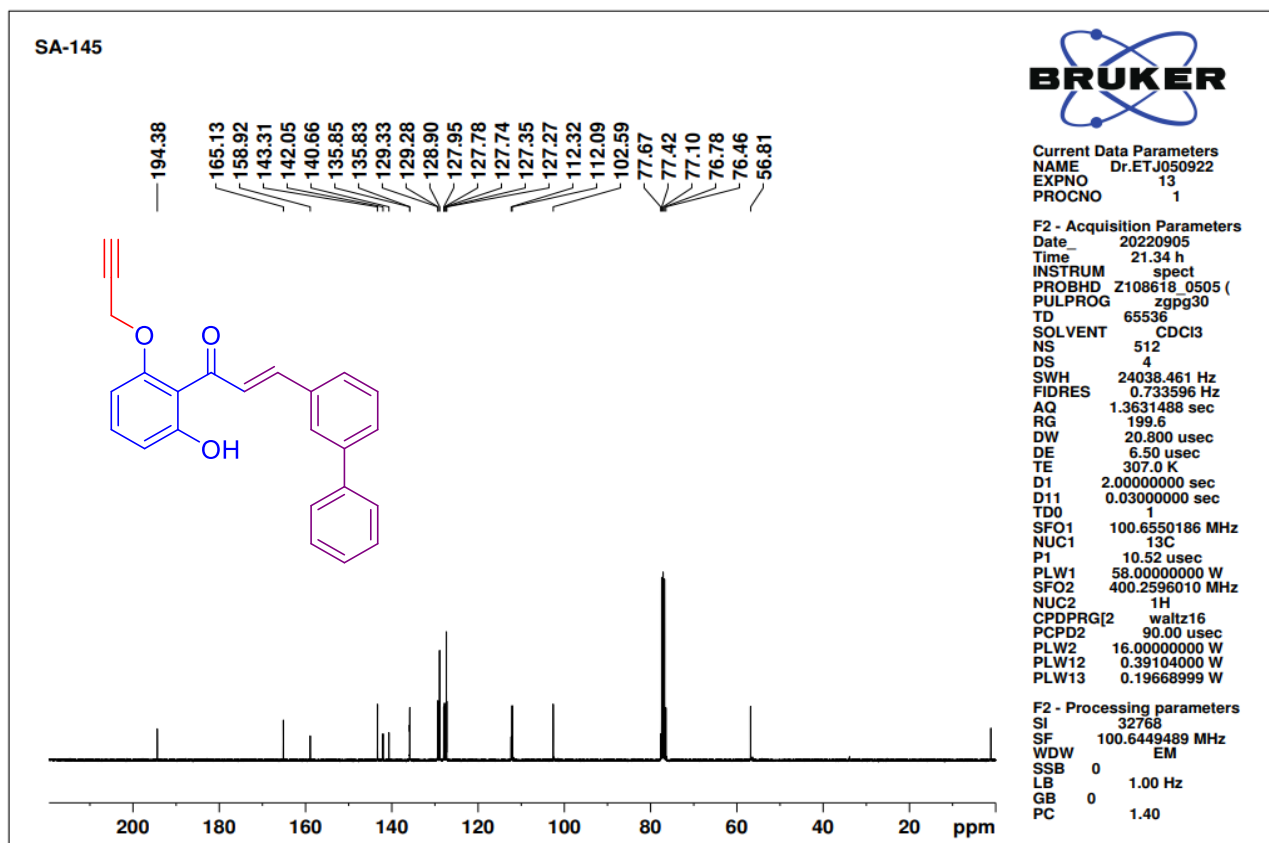Figure 27:  $^{13}\text{C}$  NMR spectrum of compound **5e**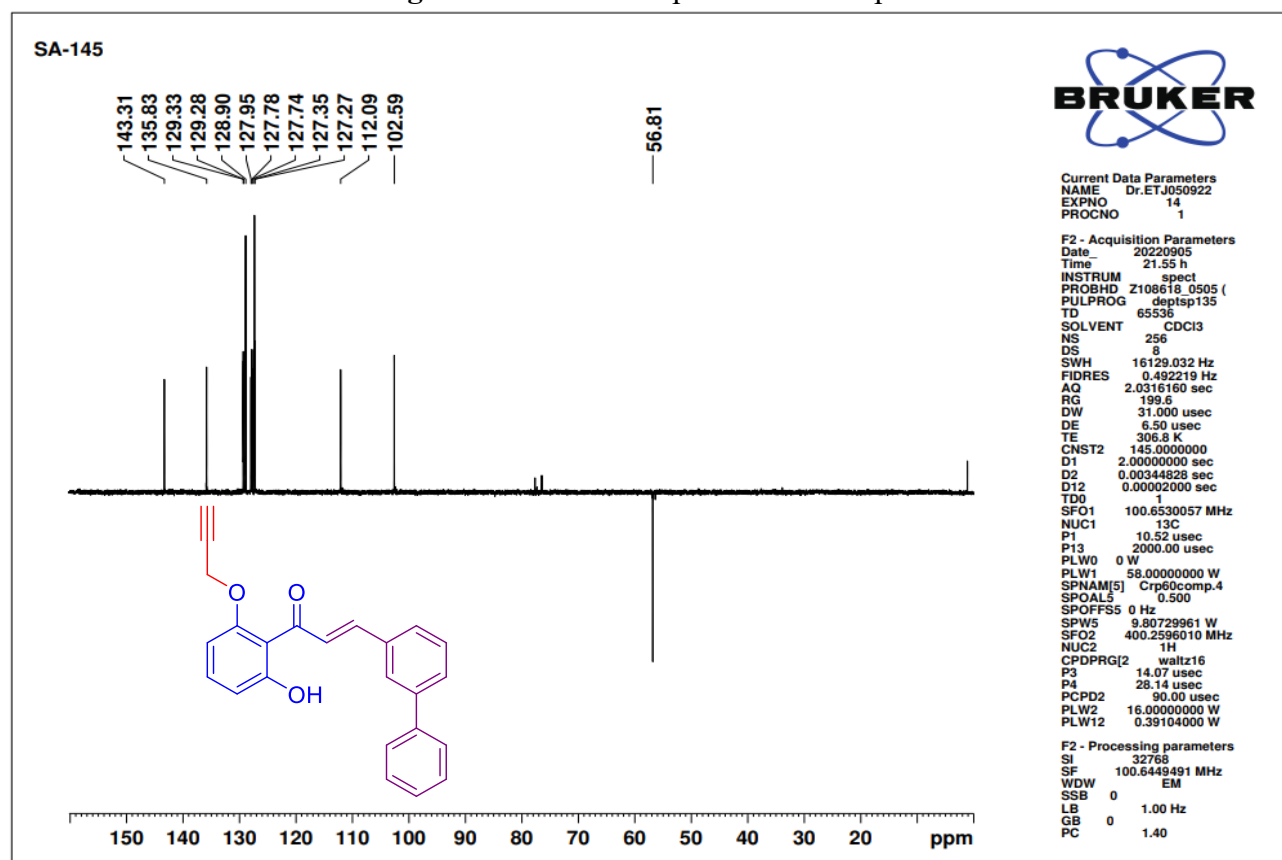Figure 28: DEPT-135 NMR spectrum of compound **5e**

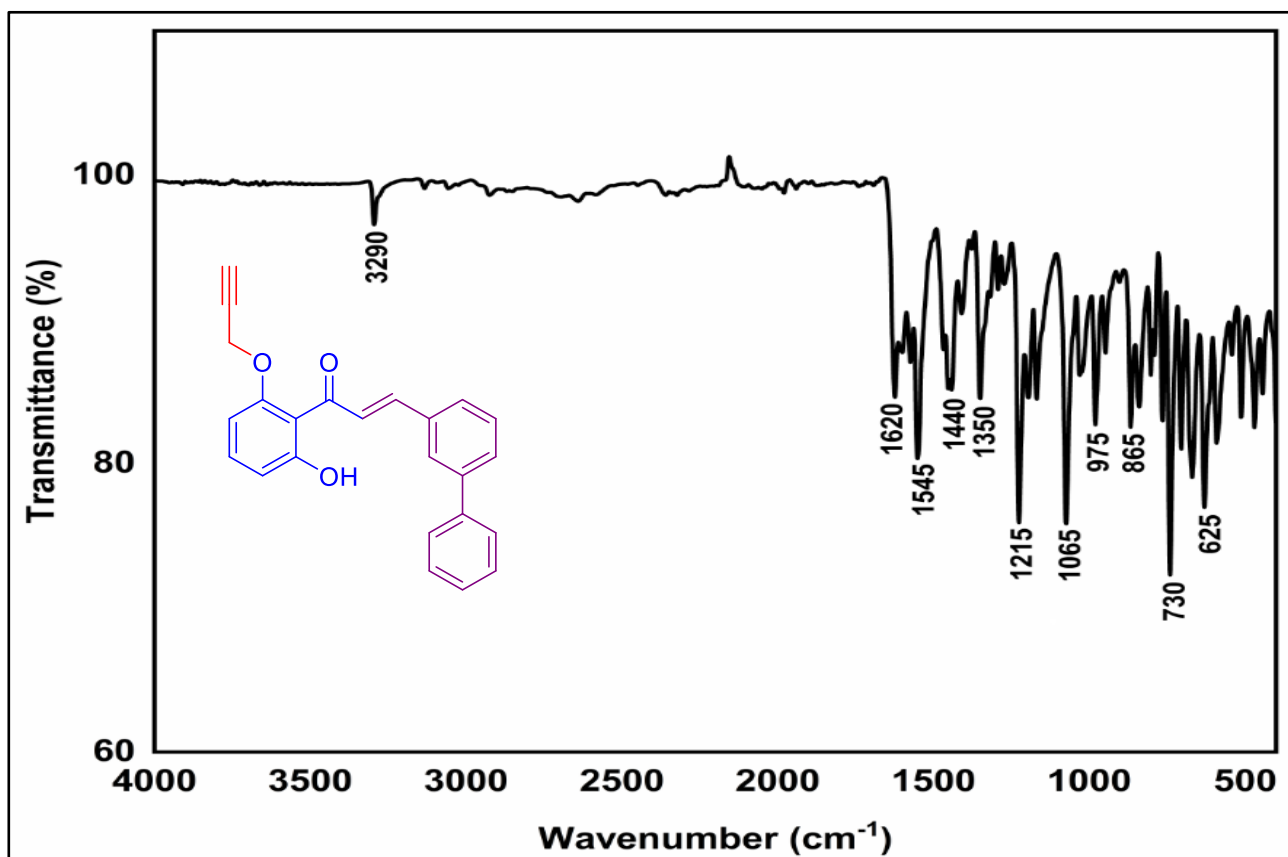

Figure 29: FT-IR spectrum of compound 5e

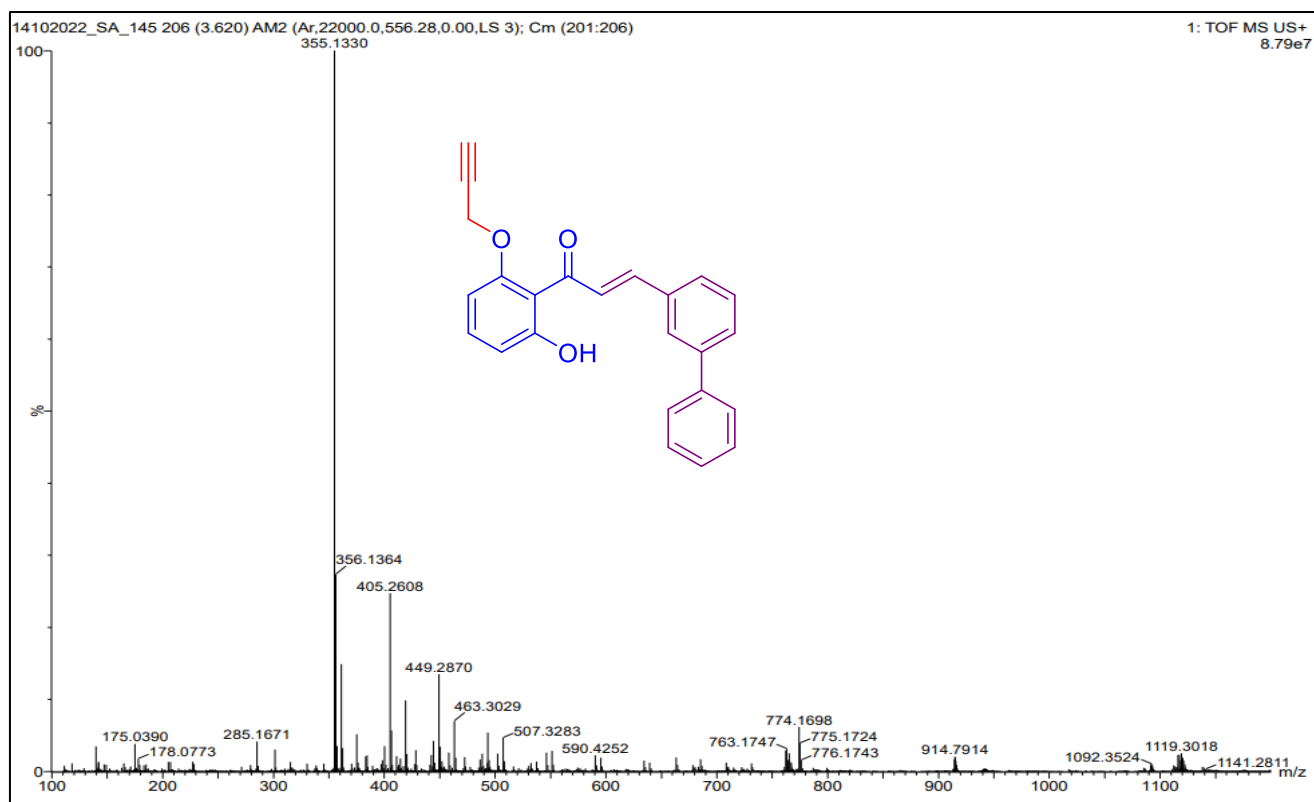

Figure 30: HRMS spectrum of compound 5e



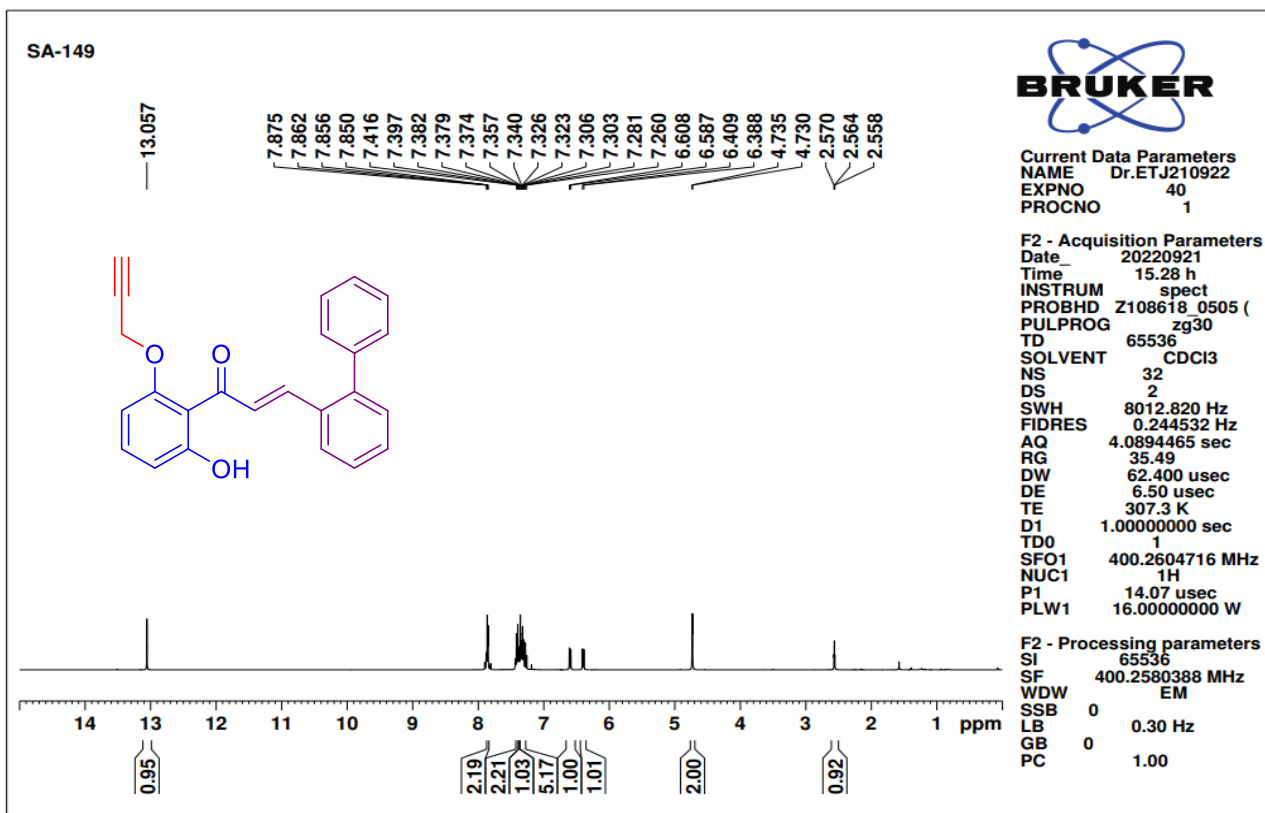Figure 31:  $^1\text{H}$  NMR spectrum of compound 5f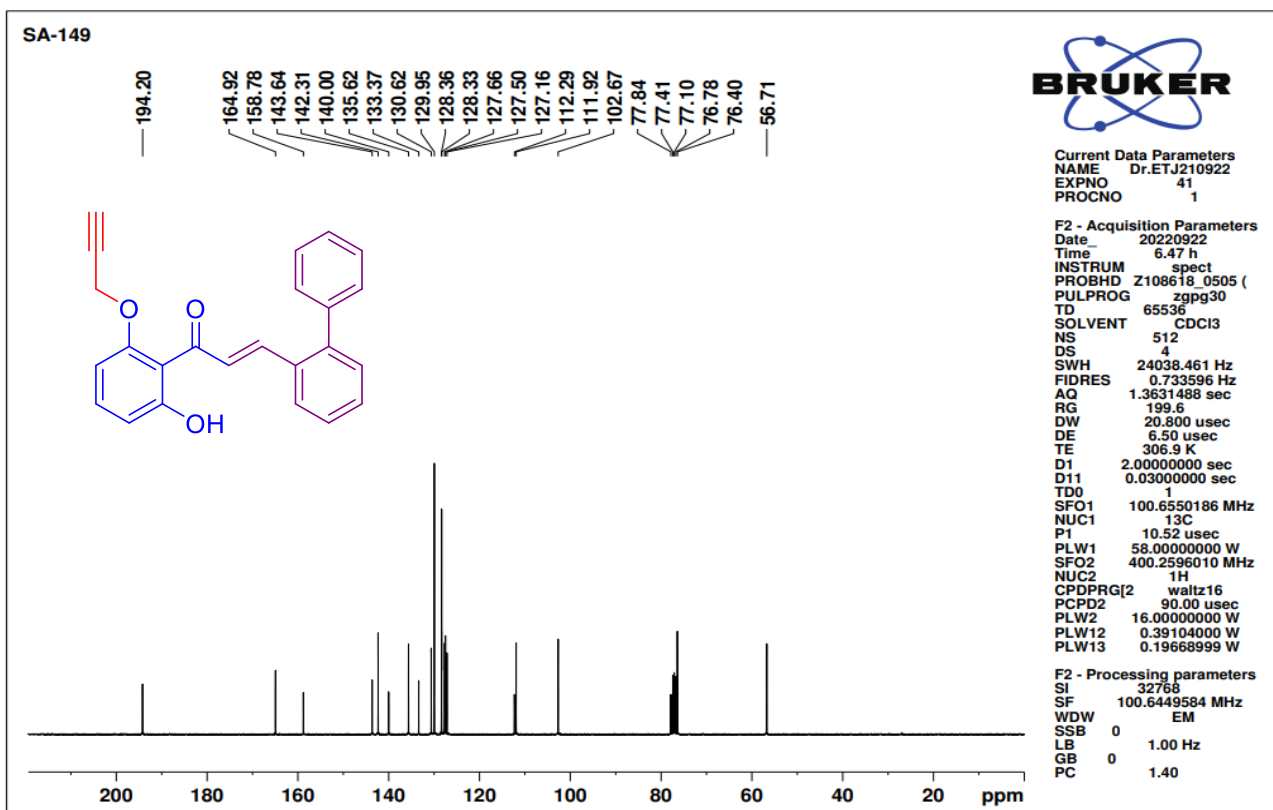Figure 32:  $^{13}\text{C}$  NMR spectrum of compound 5f

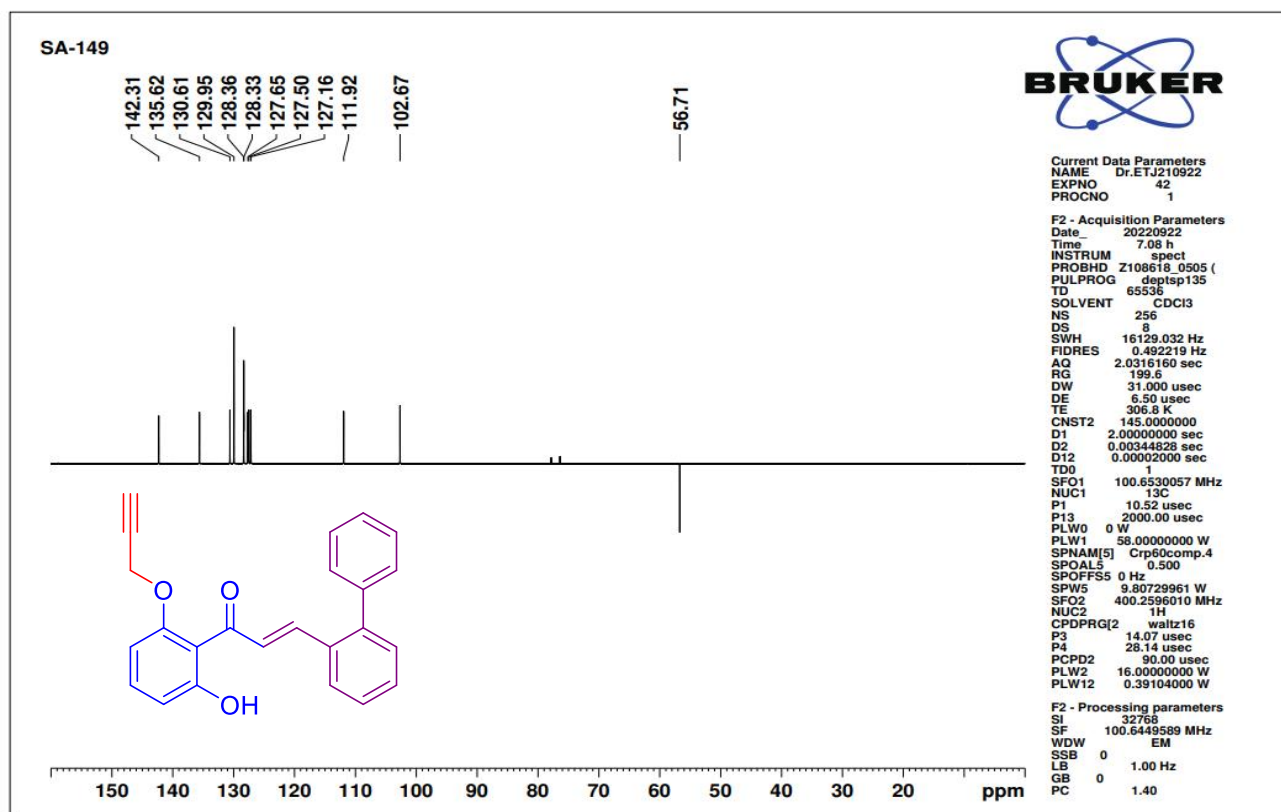

Figure 33: DEPT-135 NMR spectrum of compound 5f

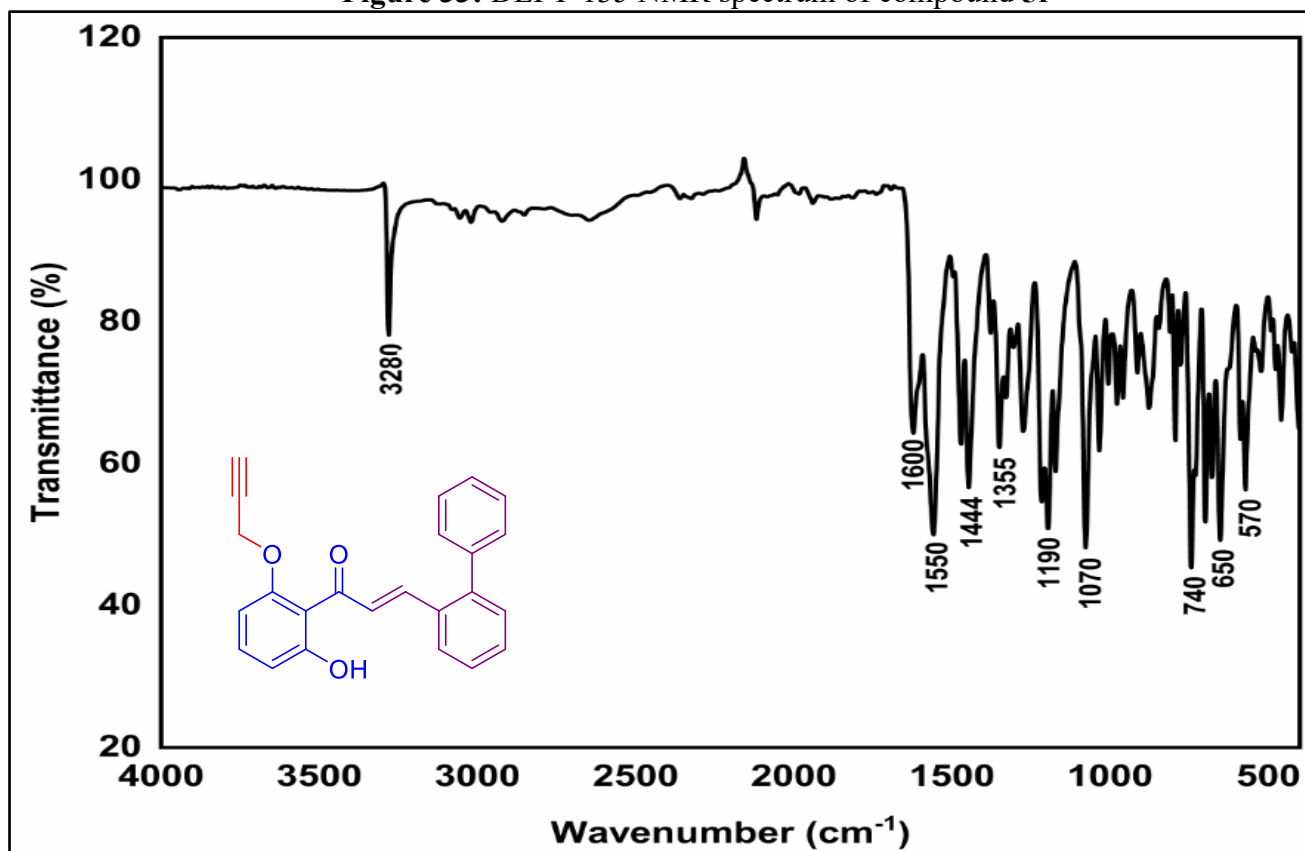

Figure 34: FT-IR spectrum of compound 5f

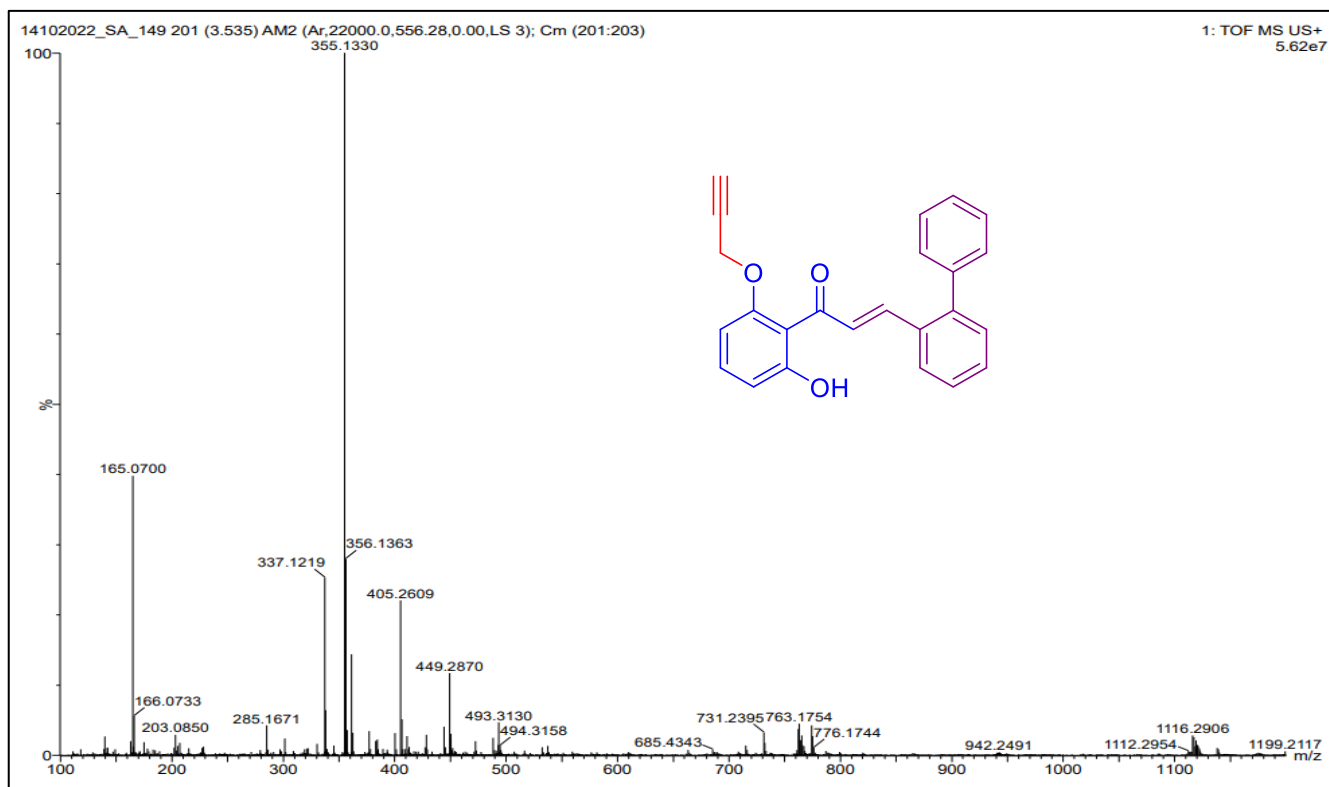

Figure 35: HRMS spectrum of compound 5f

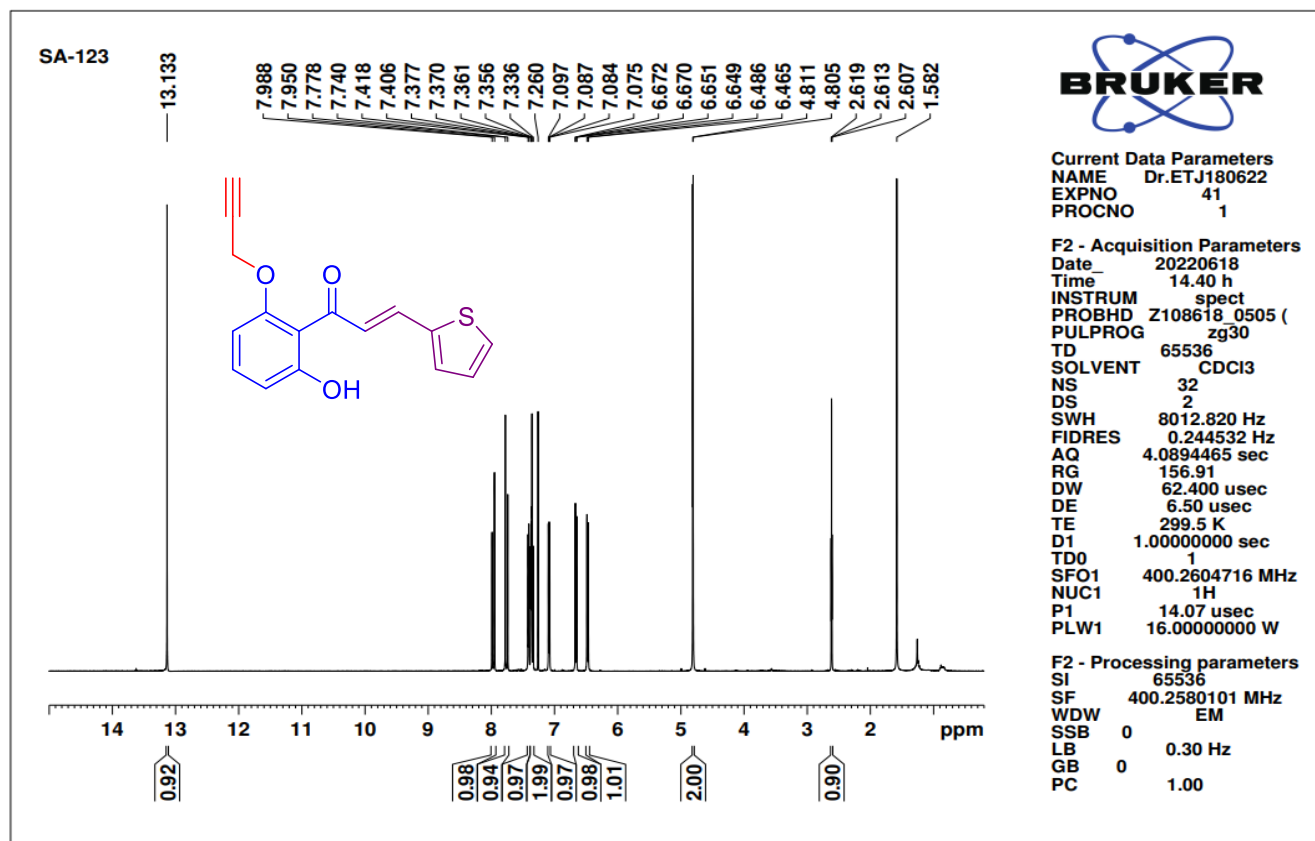Figure 36:  $^1\text{H}$  NMR spectrum of compound 5g

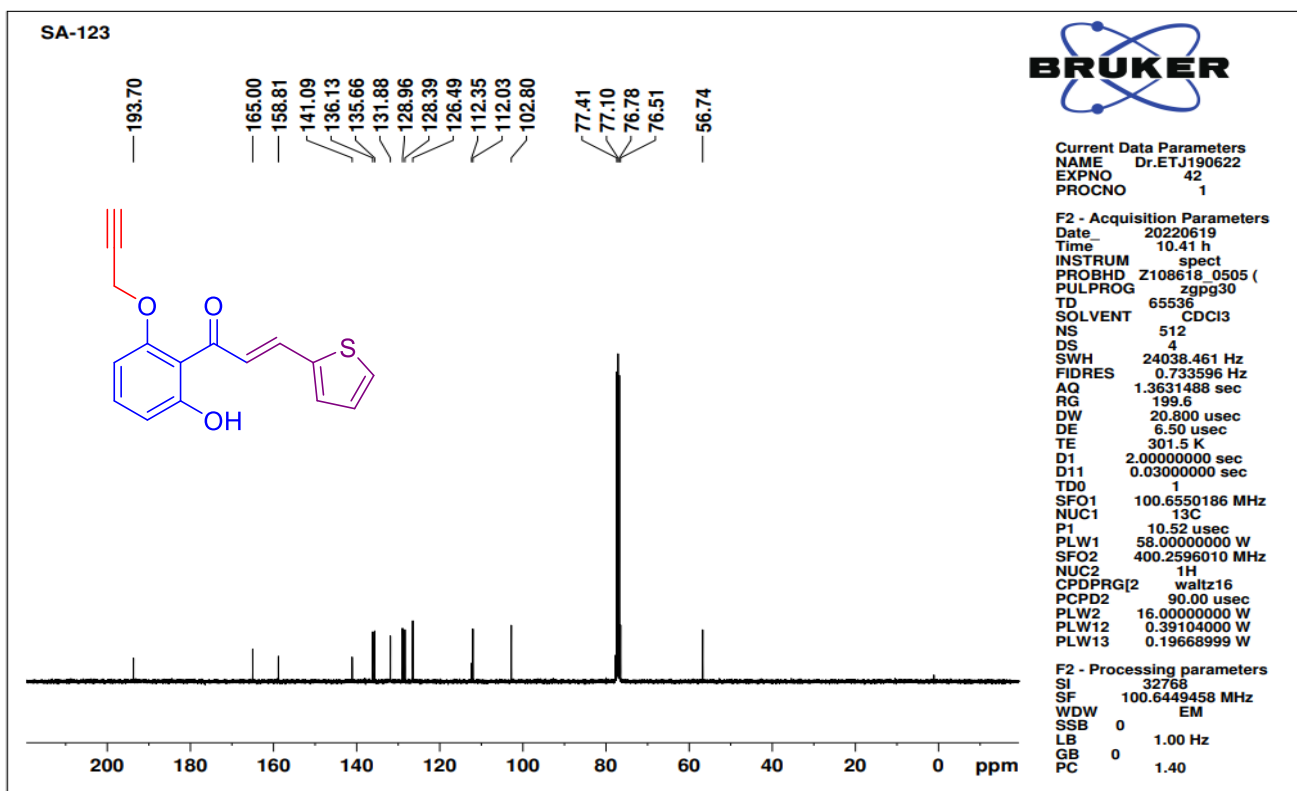Figure 37:  $^{13}\text{C}$  NMR spectrum of compound 5g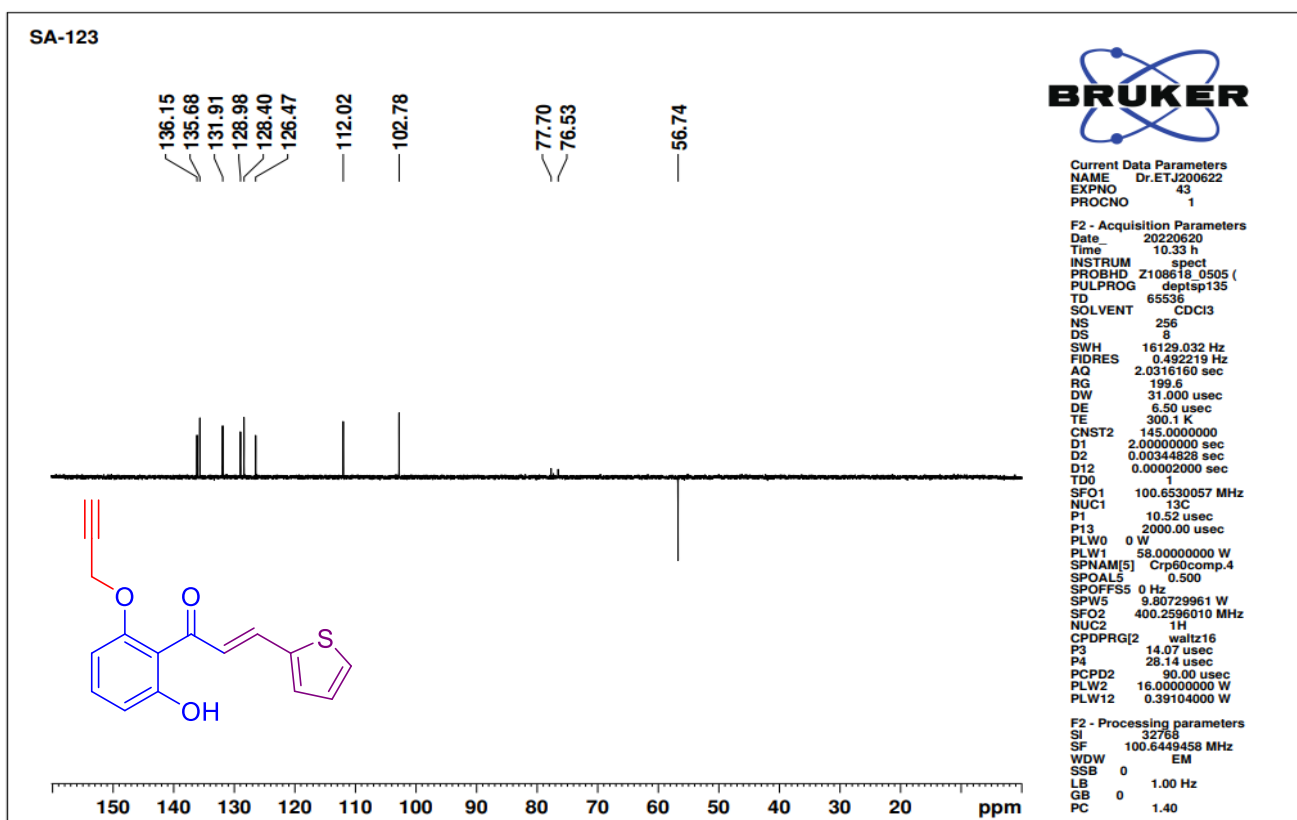

Figure 38: DEPT-135 NMR spectrum of compound 5g

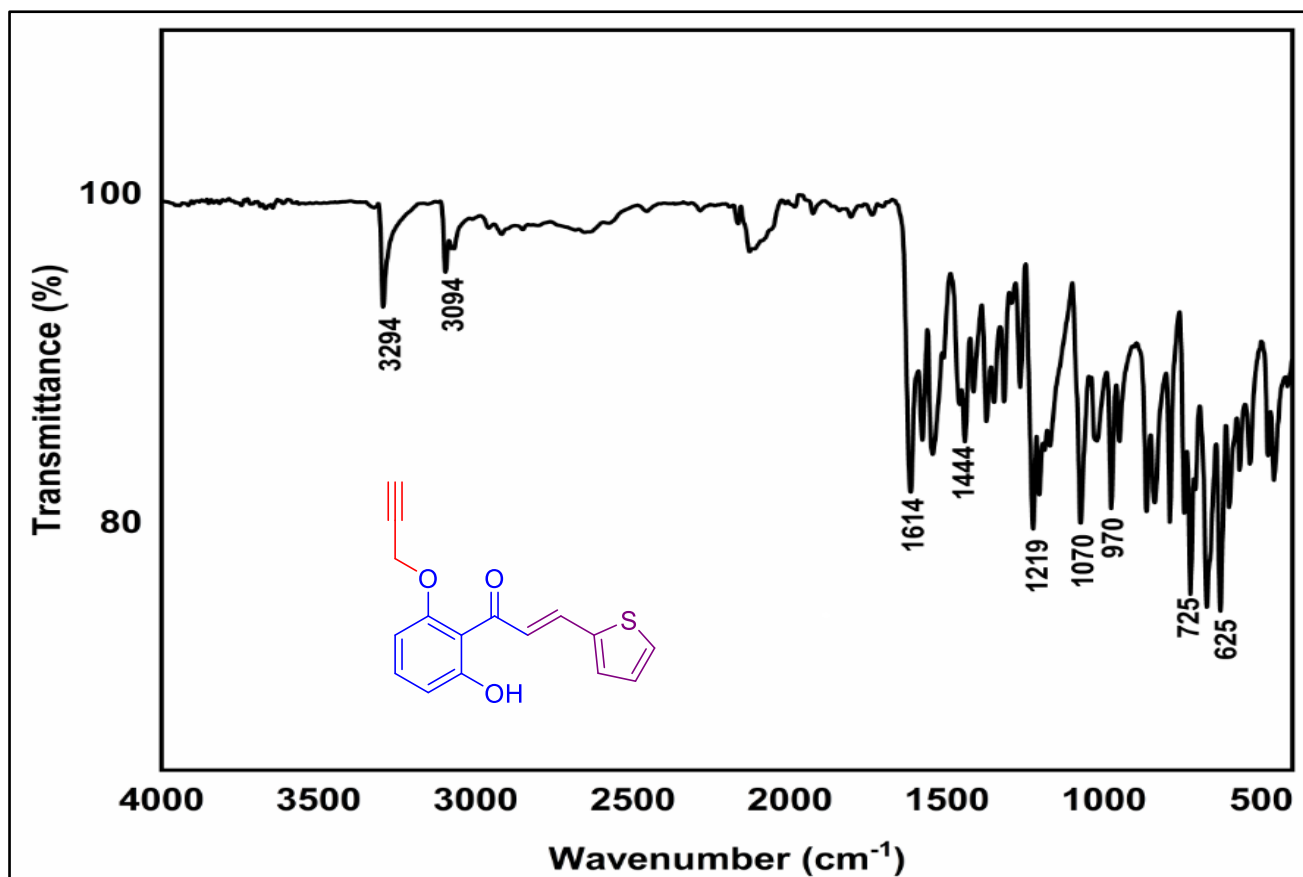**Figure 39:** FT-IR spectrum of compound 5g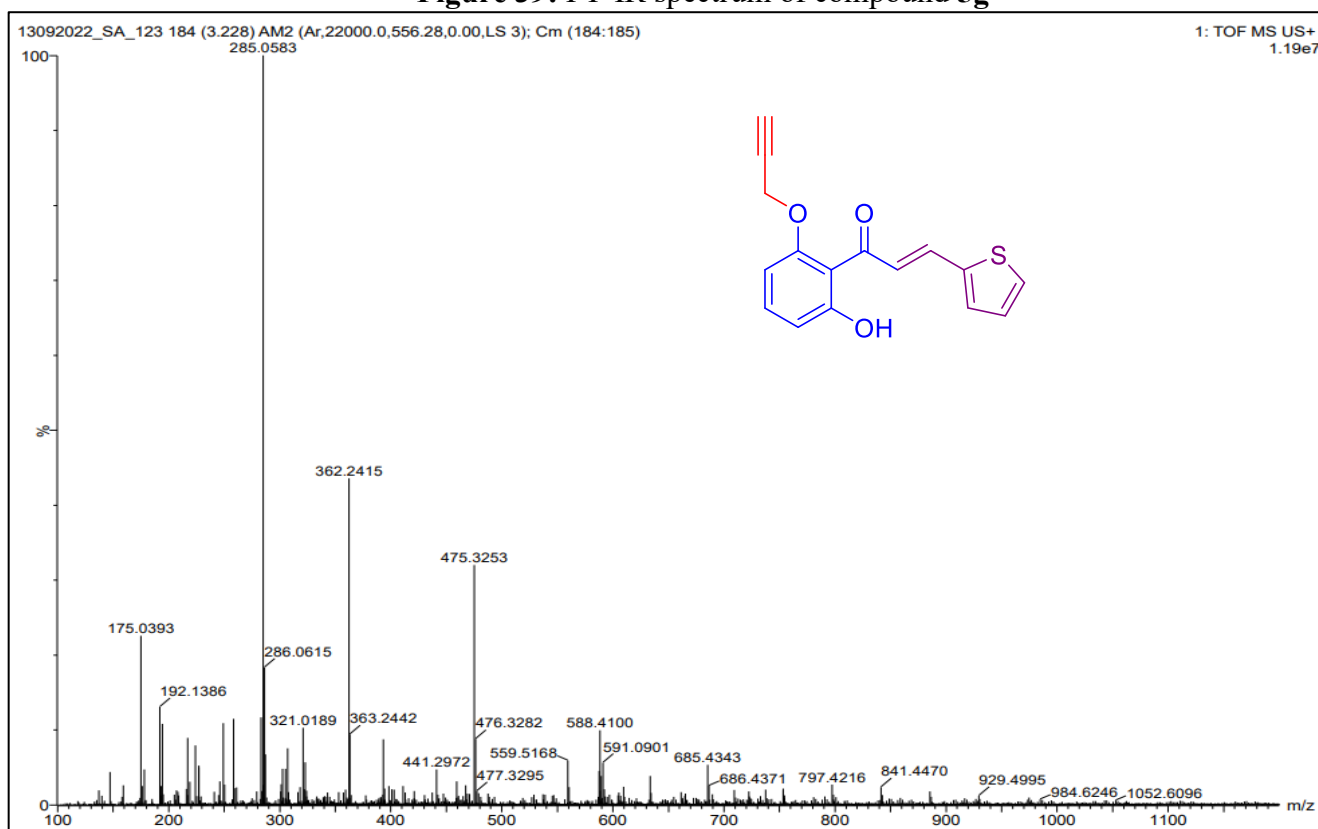**Figure 40:** HRMS spectrum of compound 5g

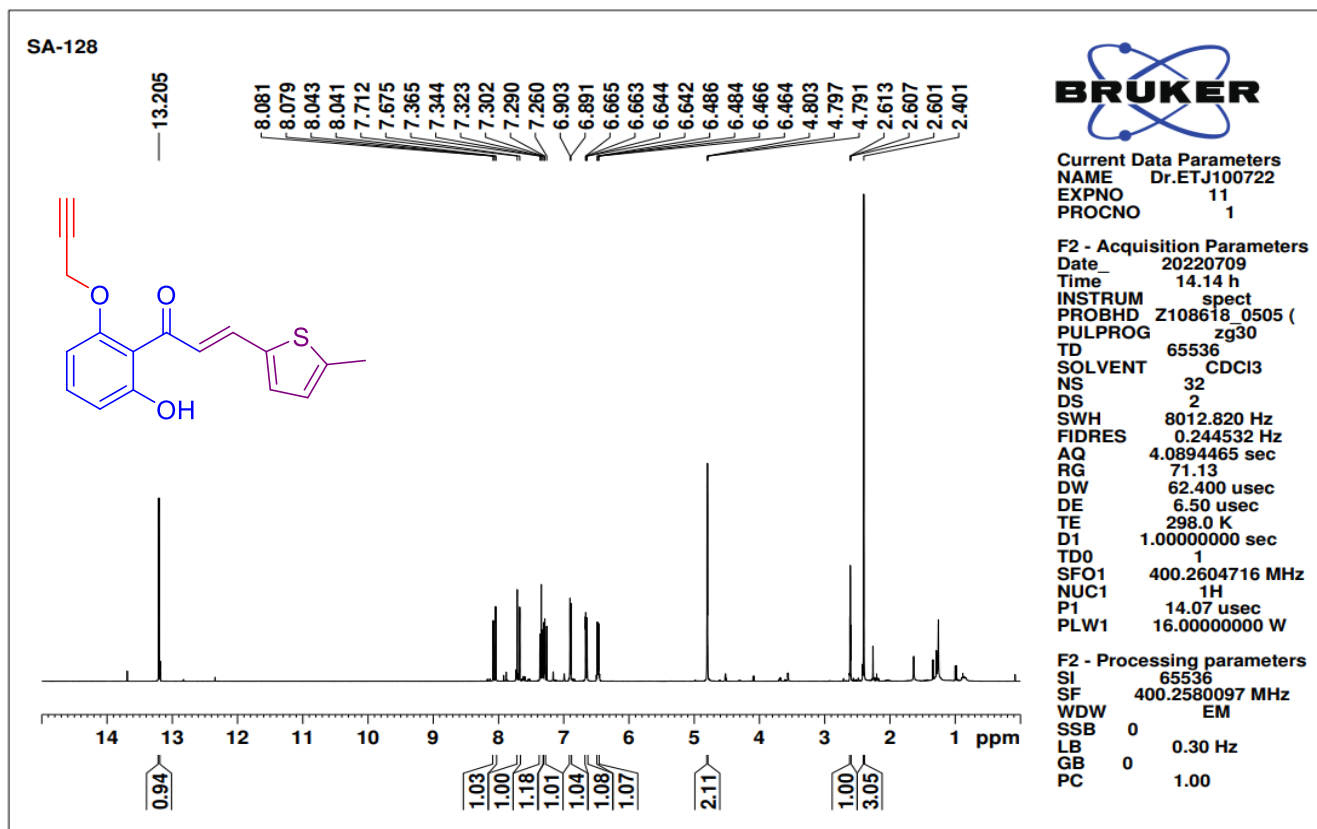Figure 41:  $^1\text{H}$  NMR spectrum of compound 5h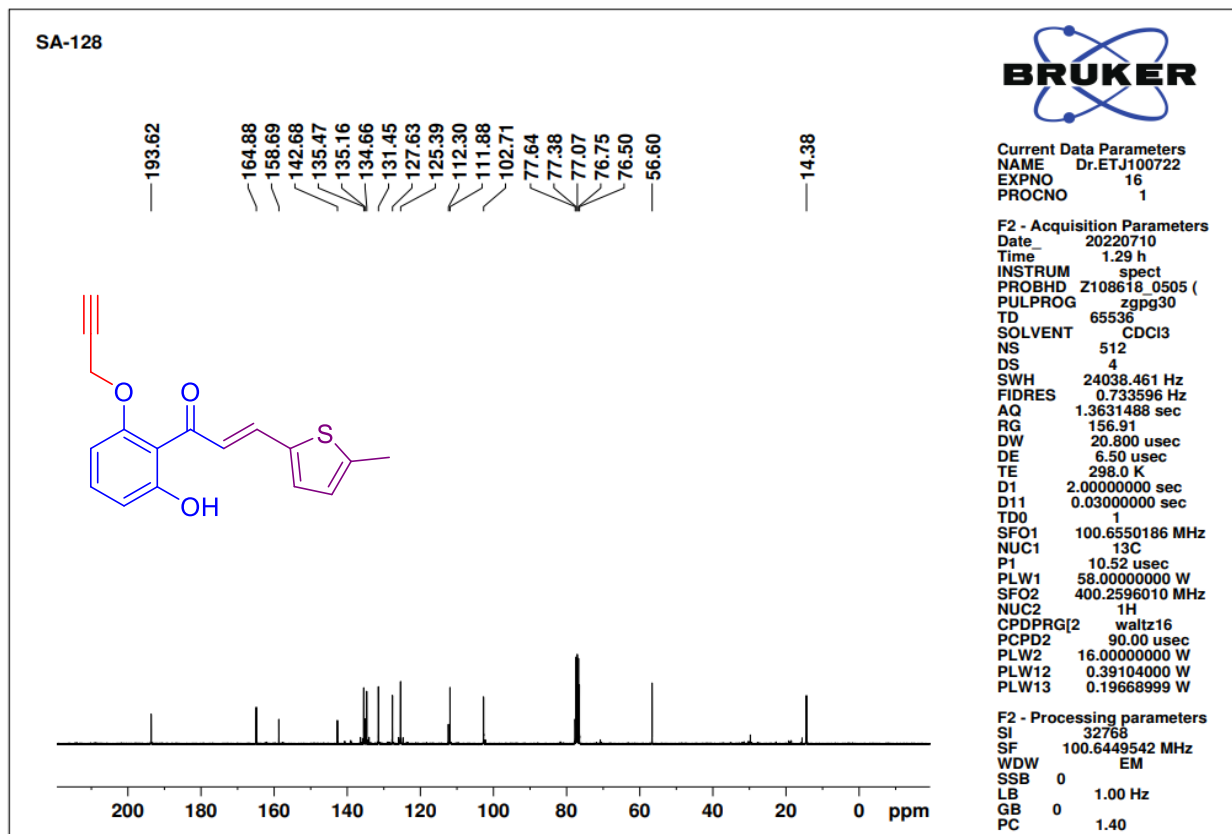Figure 42:  $^{13}\text{C}$  NMR spectrum of compound 5h

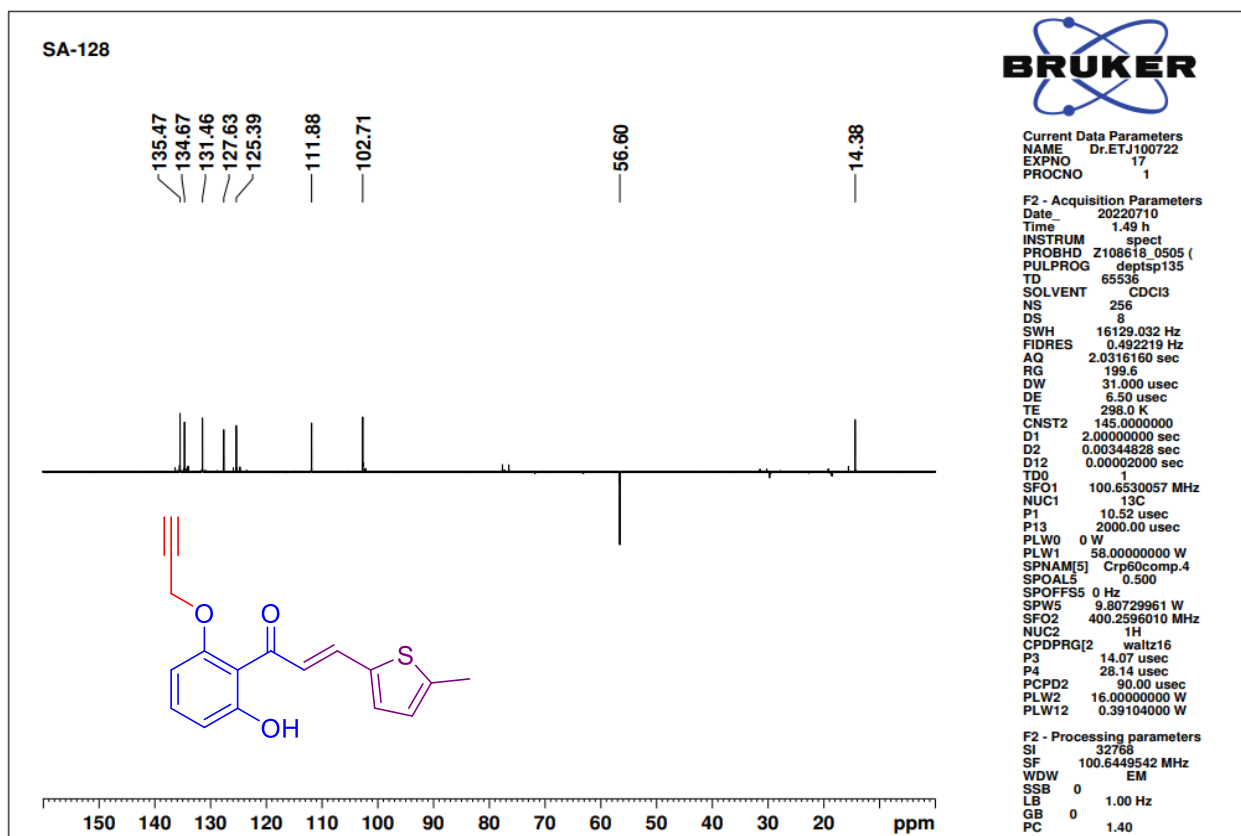

Figure 43: DEPT-135 NMR spectrum of compound 5h

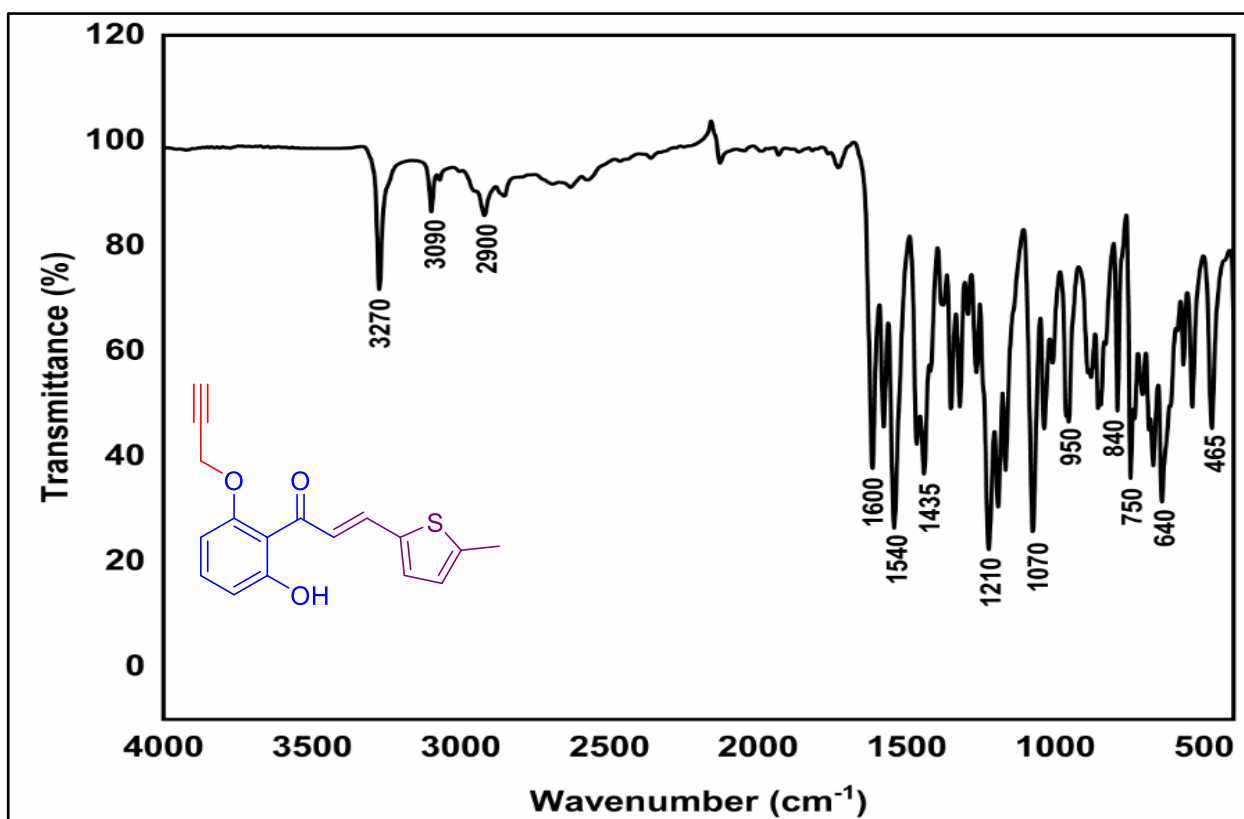

Figure 44: FT-IR spectrum of compound 5h

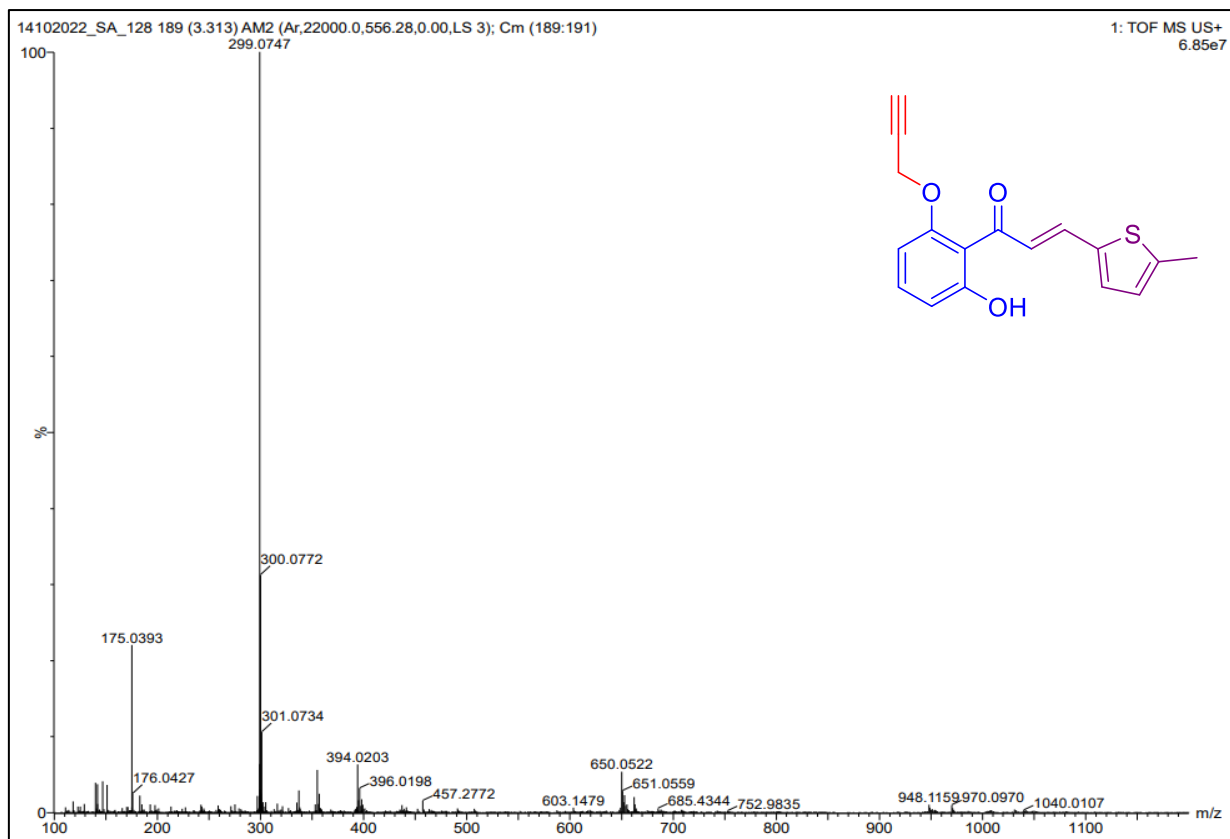

Figure 45: HRMS spectrum of compound 5h

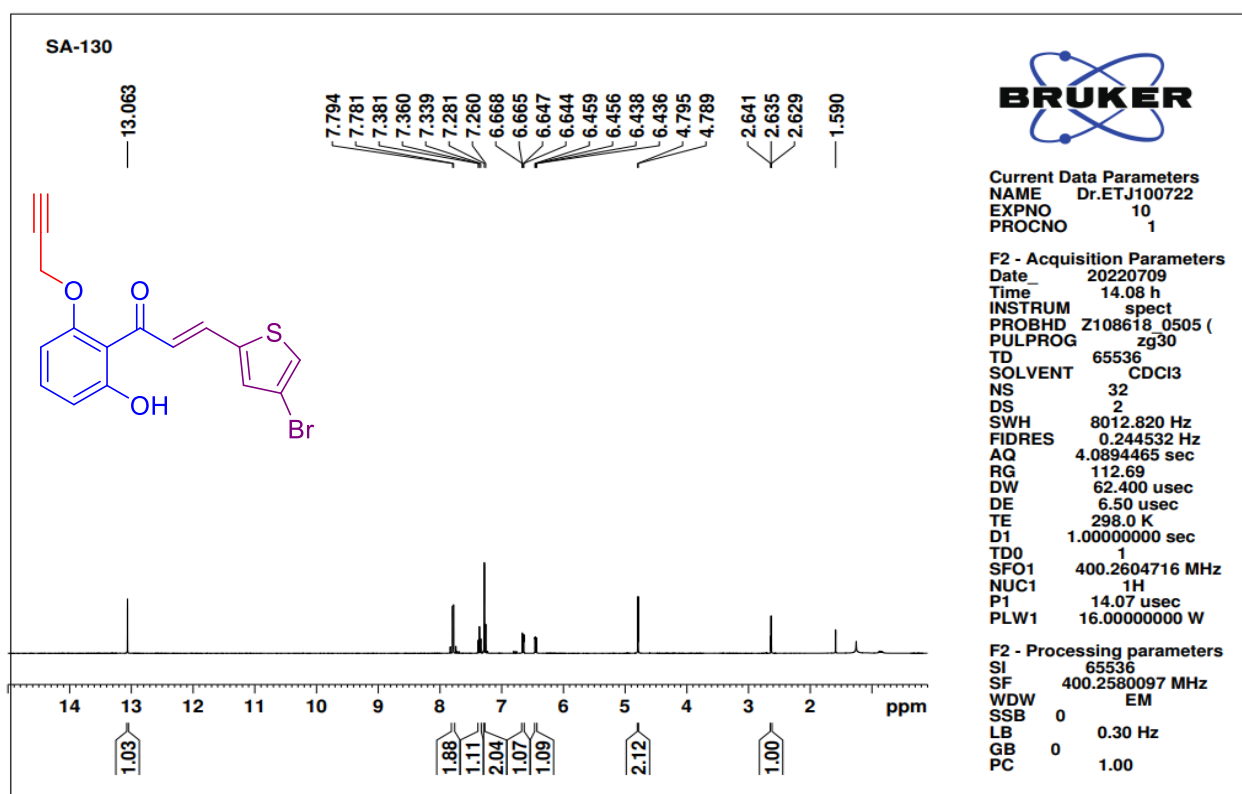Figure 46: <sup>1</sup>H NMR spectrum of compound 5i



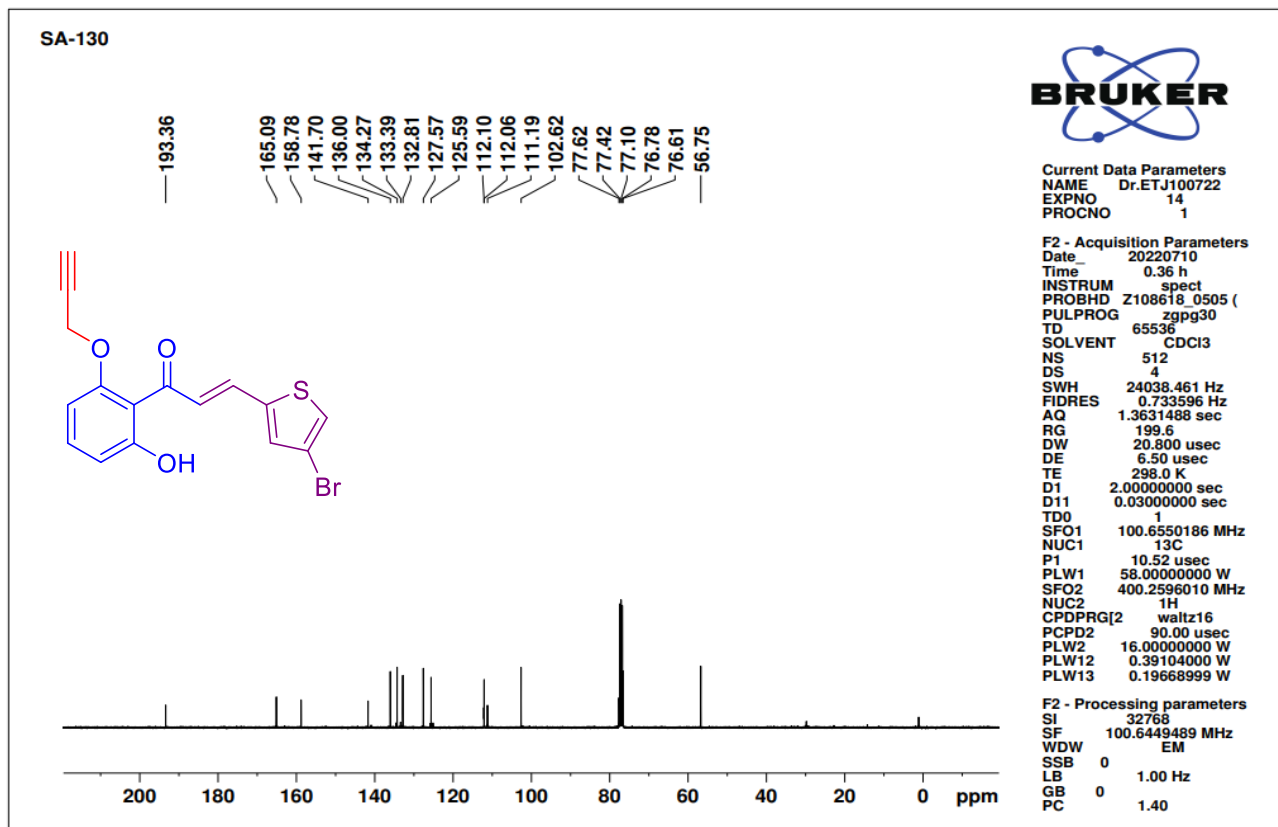Figure 47:  $^{13}\text{C}$  NMR spectrum of compound 5i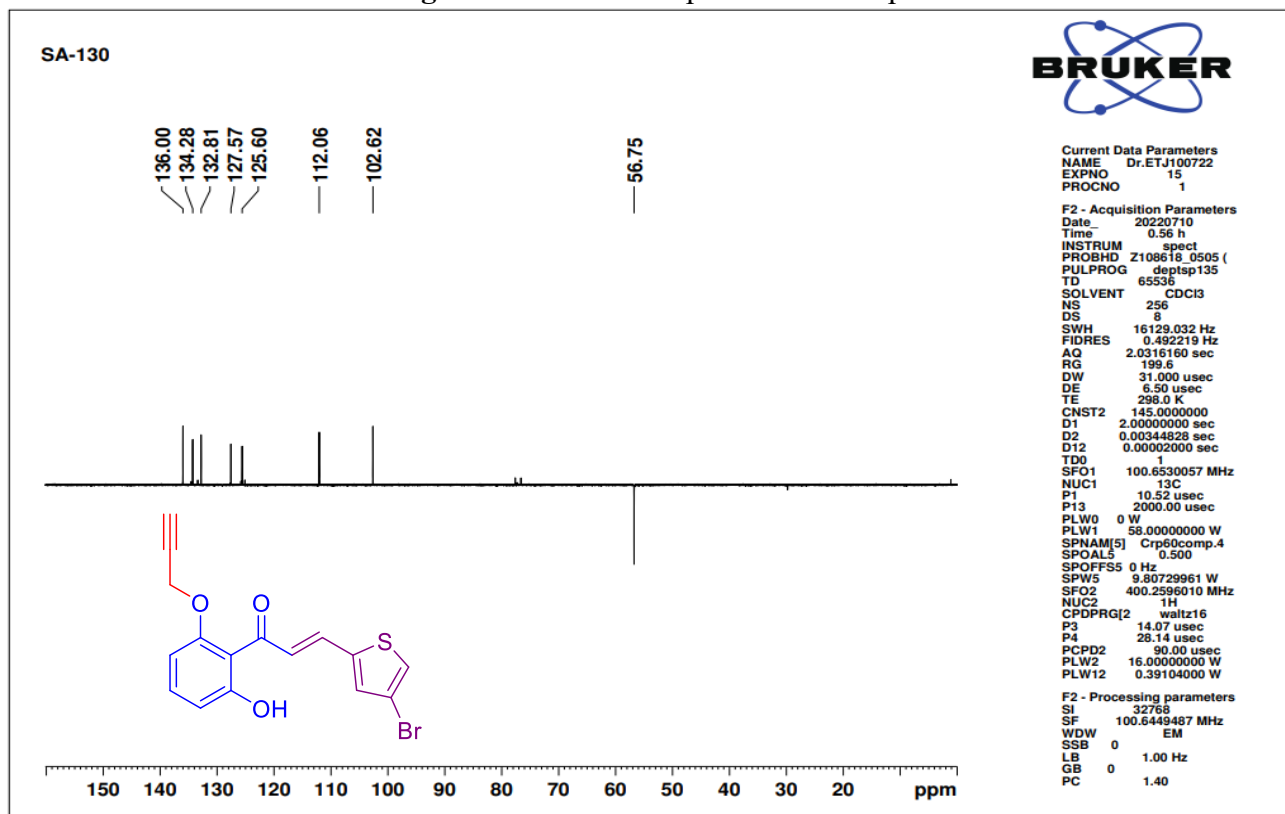

Figure 48: DEPT-135 NMR spectrum of compound 5i

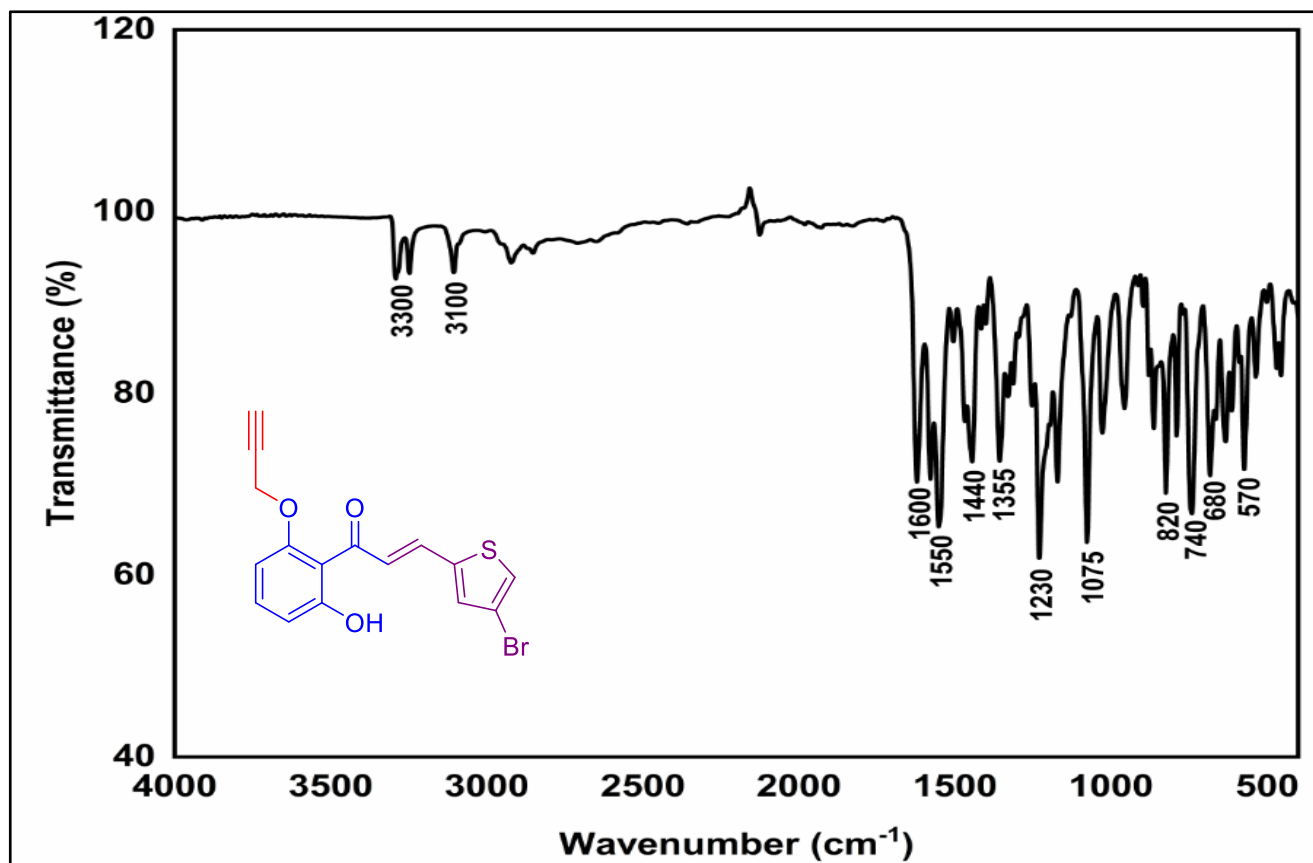Figure 49: FT-IR spectrum of compound **5i**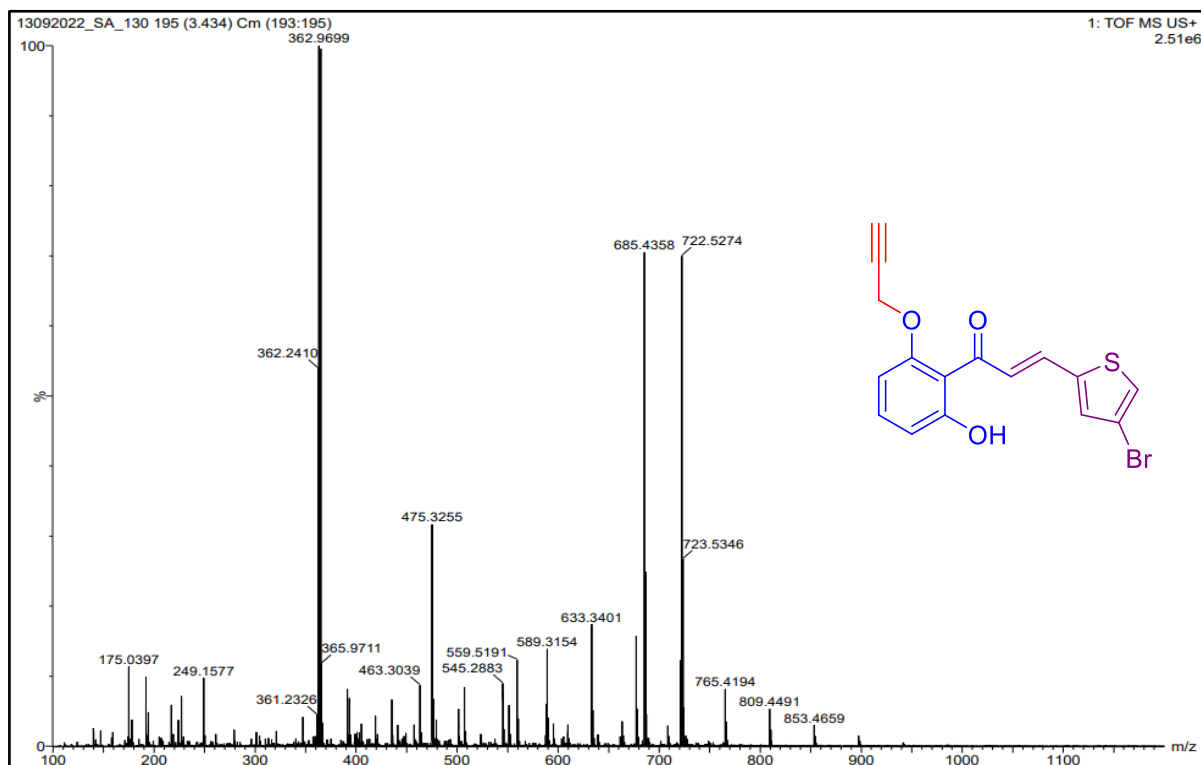Figure 50: HRMS spectrum of compound **5i**

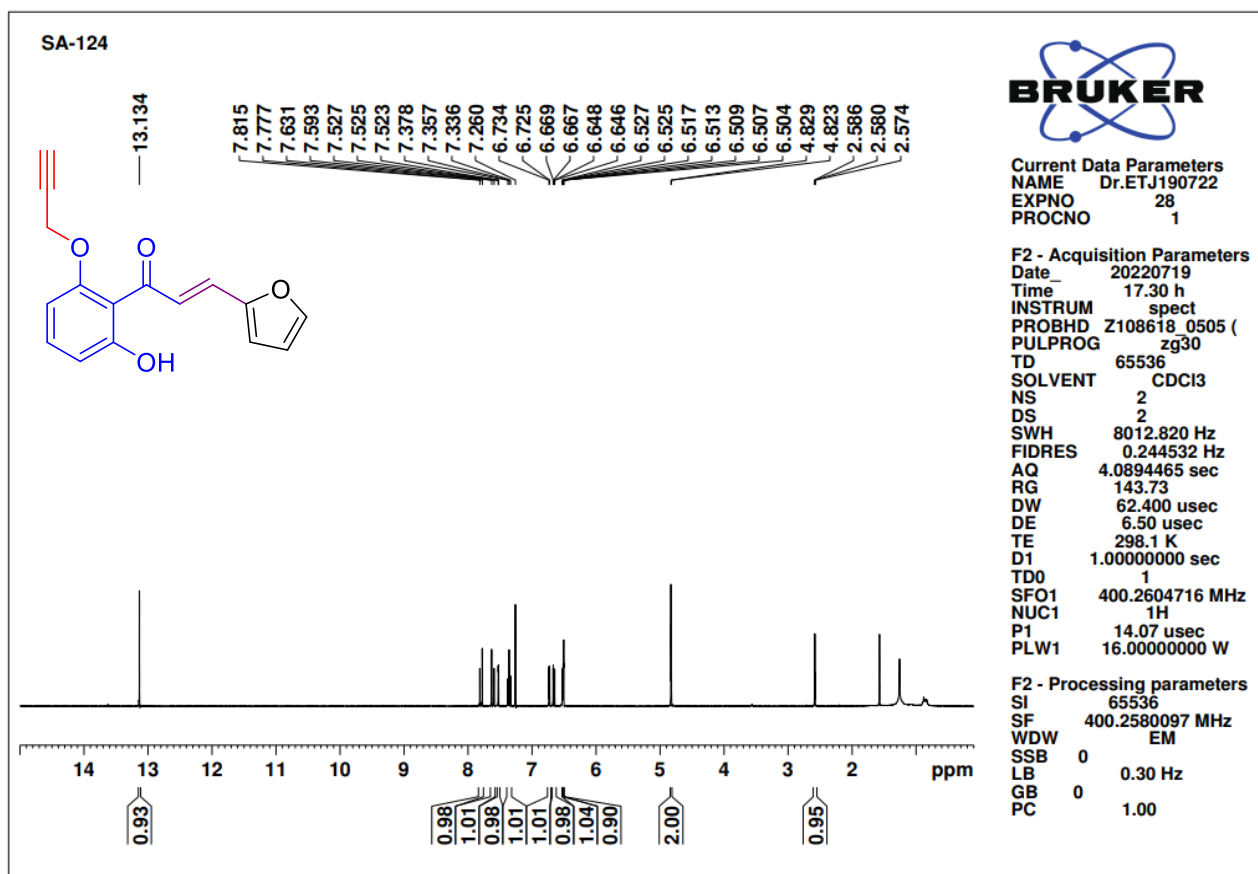Figure 51:  $^1\text{H}$  NMR spectrum of compound 5j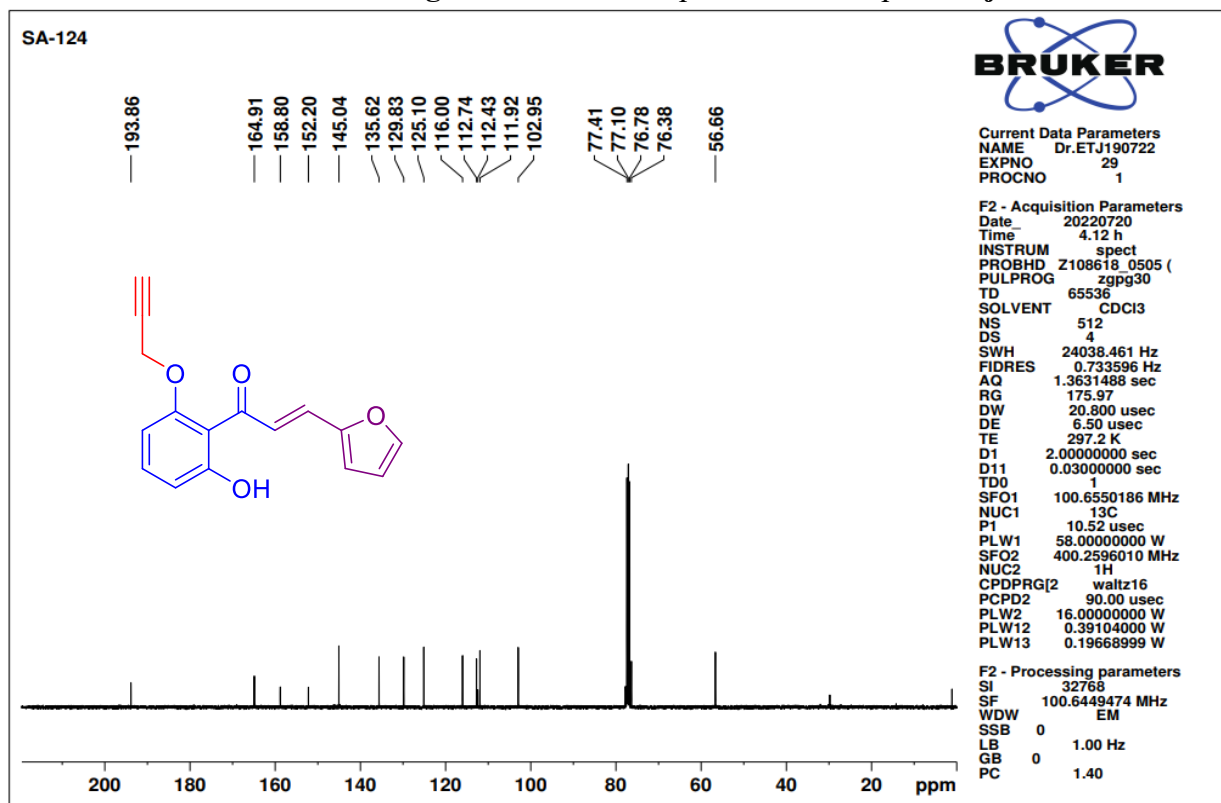Figure 52:  $^{13}\text{C}$  NMR spectrum of compound 5j

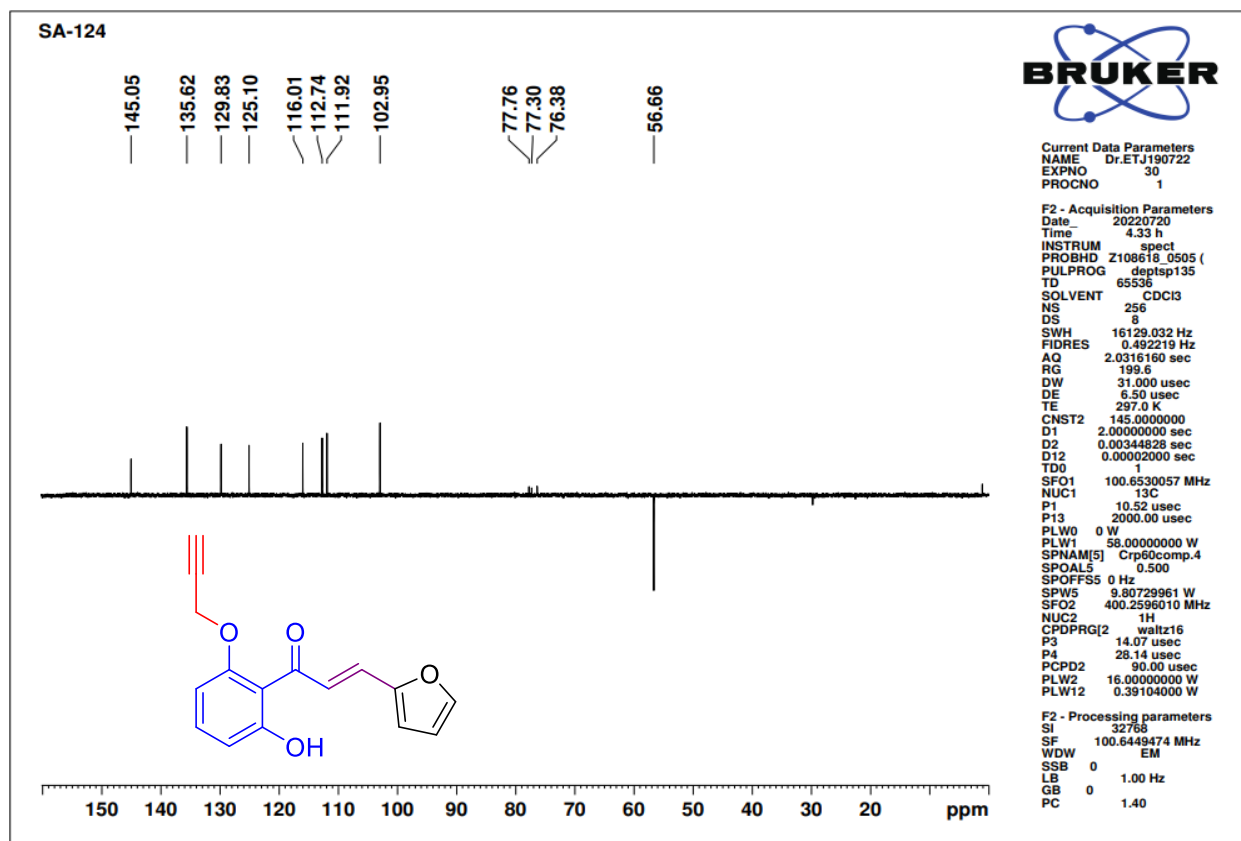

Figure 53: DEPT-135 NMR spectrum of compound 5j

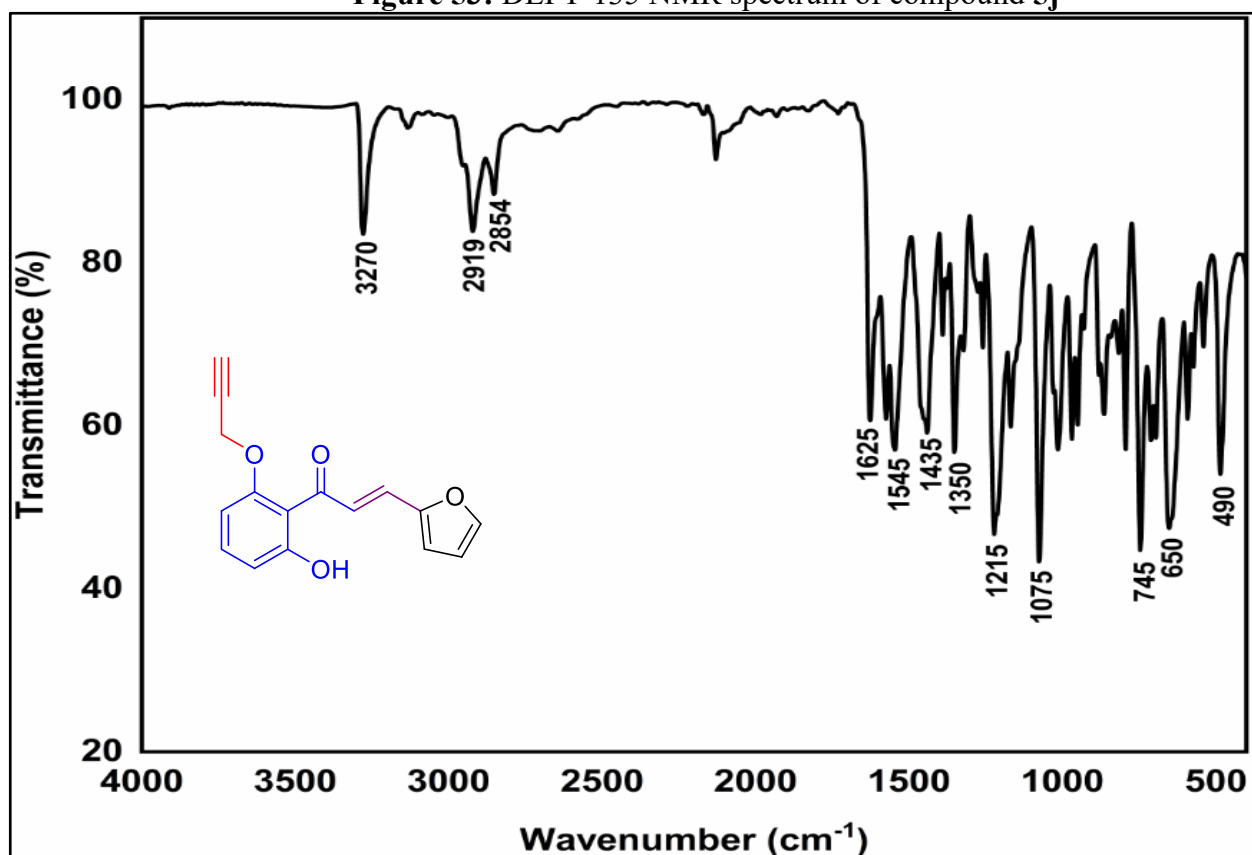

Figure 54: FT-IR spectrum of compound 5j

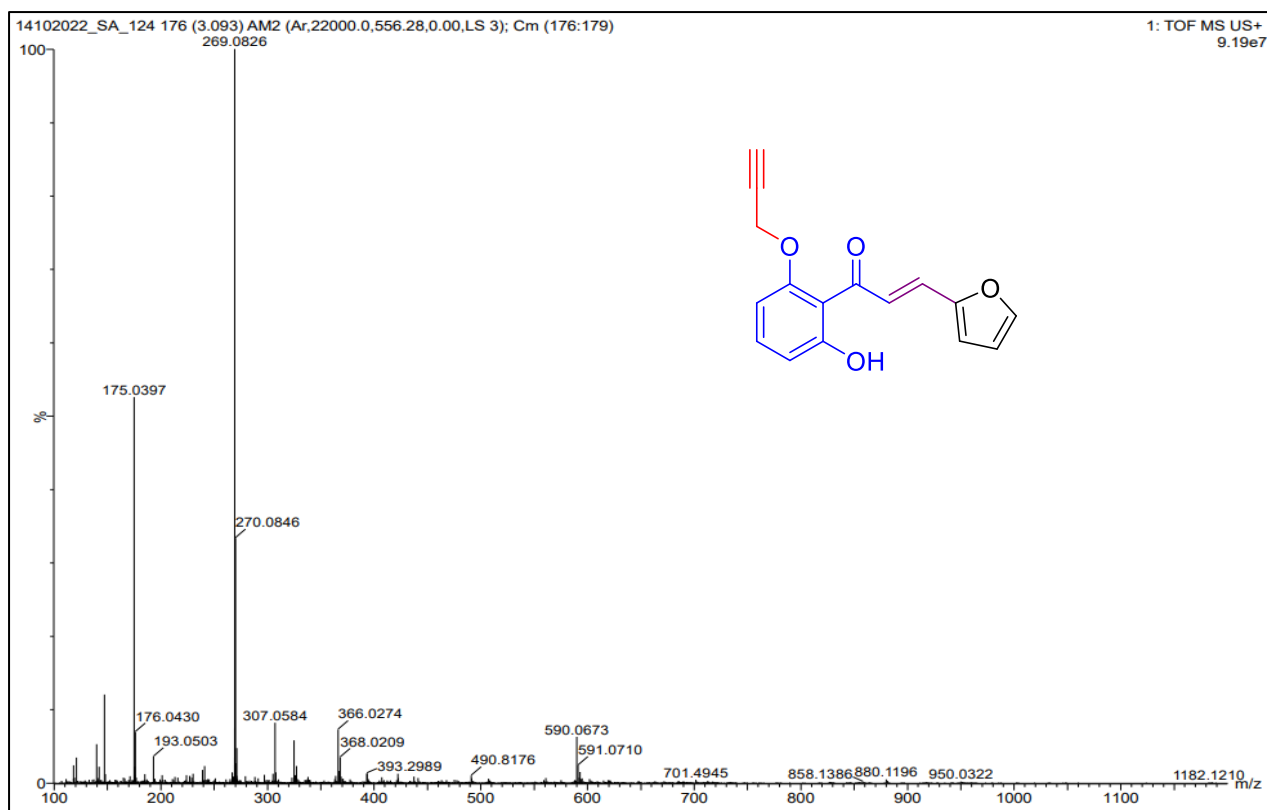

Figure 55: HRMS spectrum of compound 5j

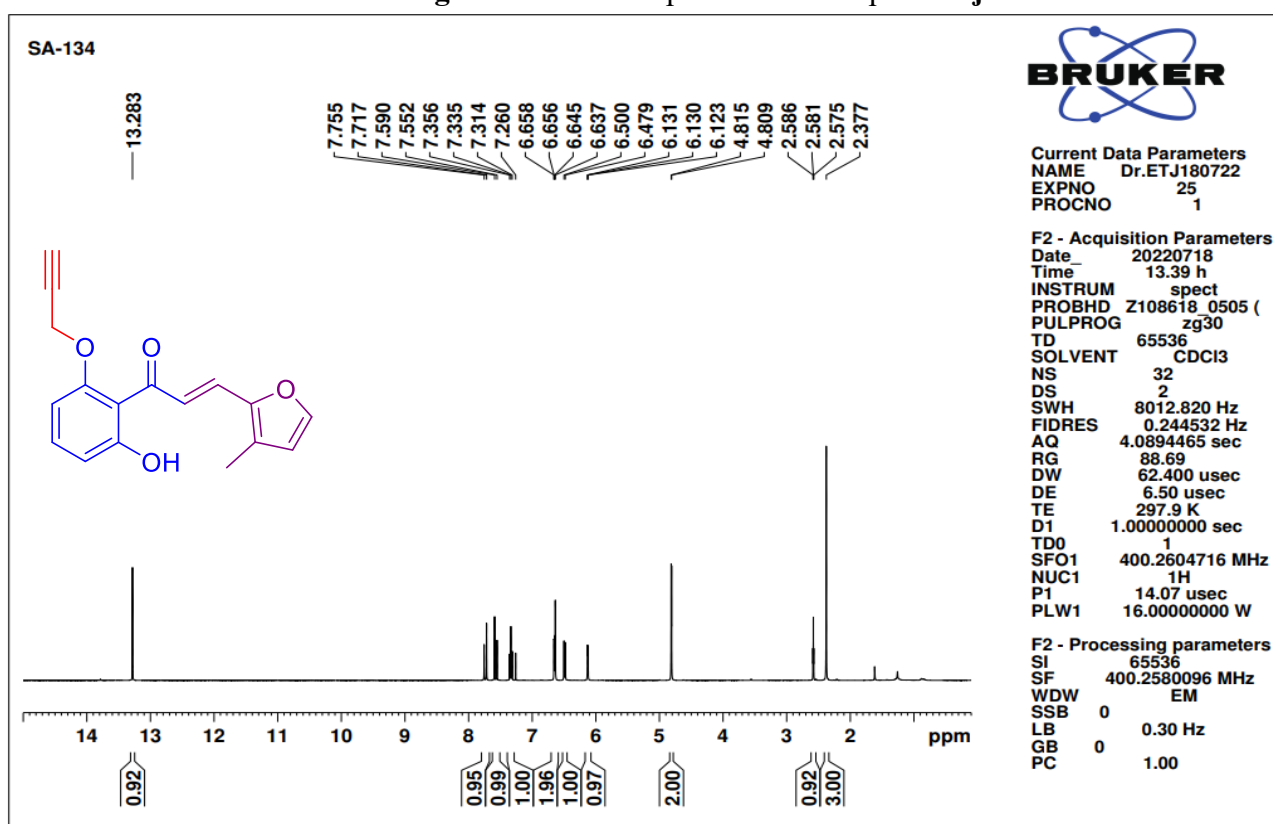Figure 56:  $^1\text{H}$  NMR spectrum of compound 5k

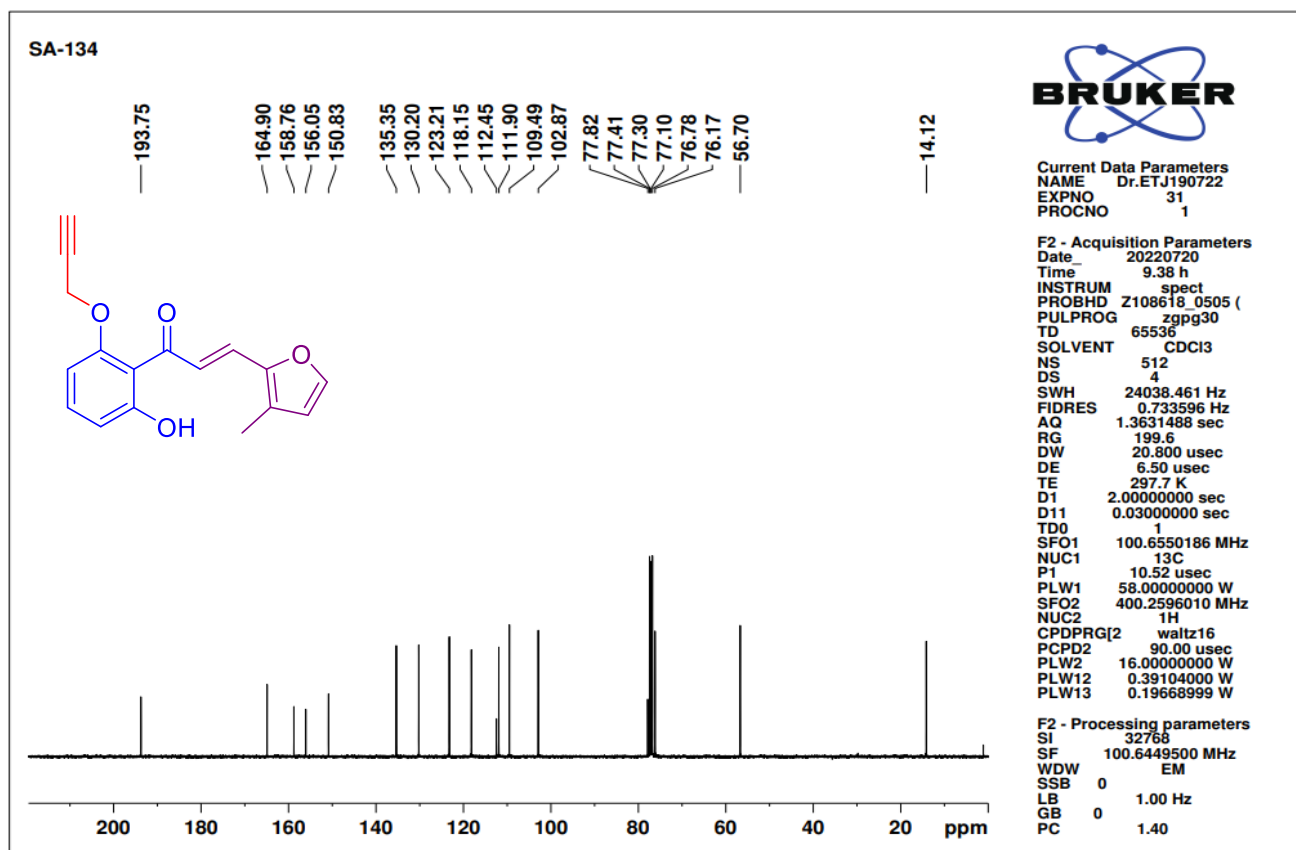Figure 57:  $^{13}\text{C}$  NMR spectrum of compound 5k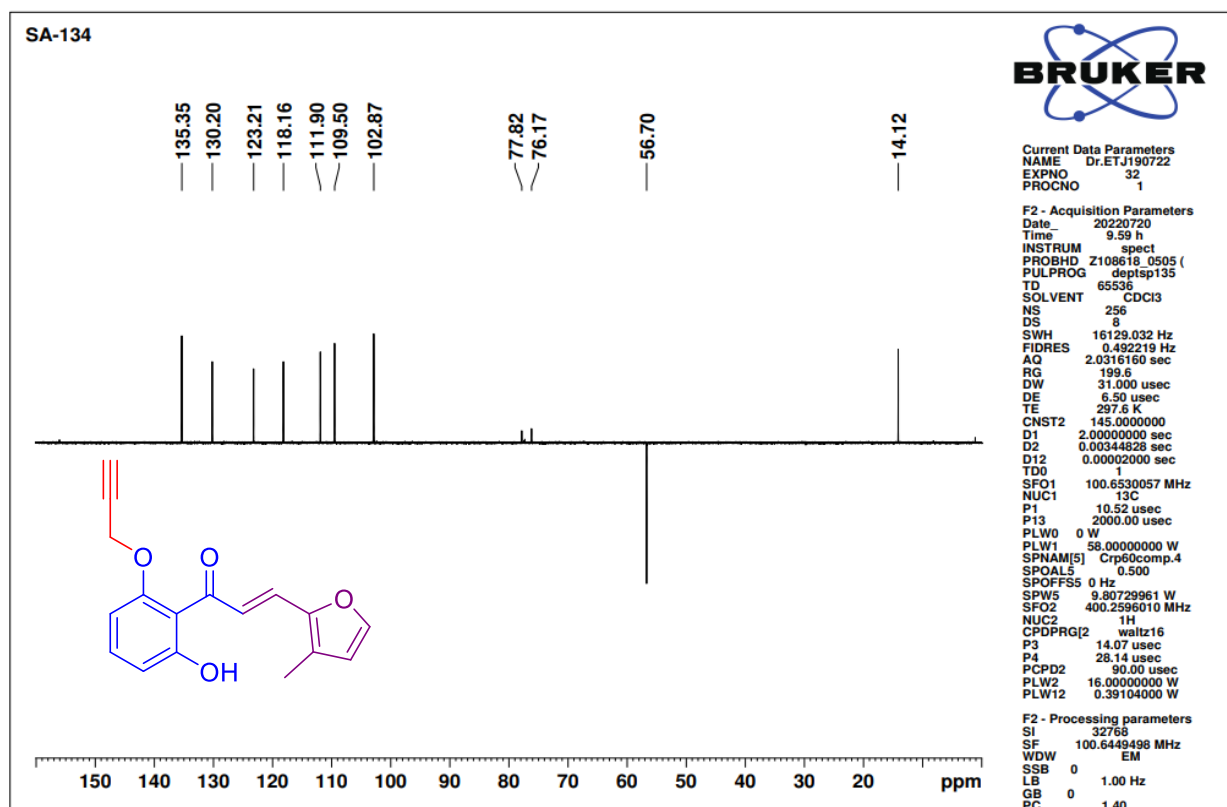

Figure 58: DEPT-135 NMR spectrum of compound 5k

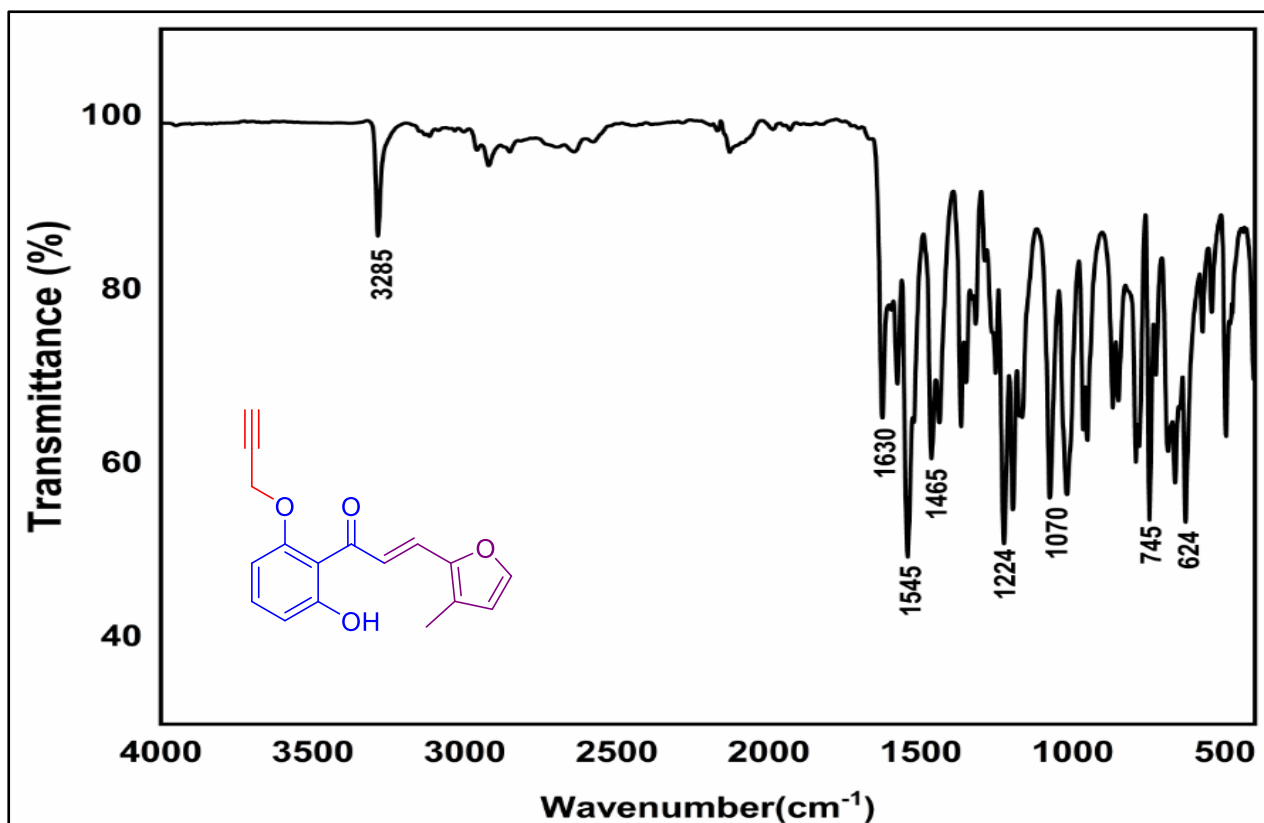**Figure 59:** FT-IR spectrum of compound 5k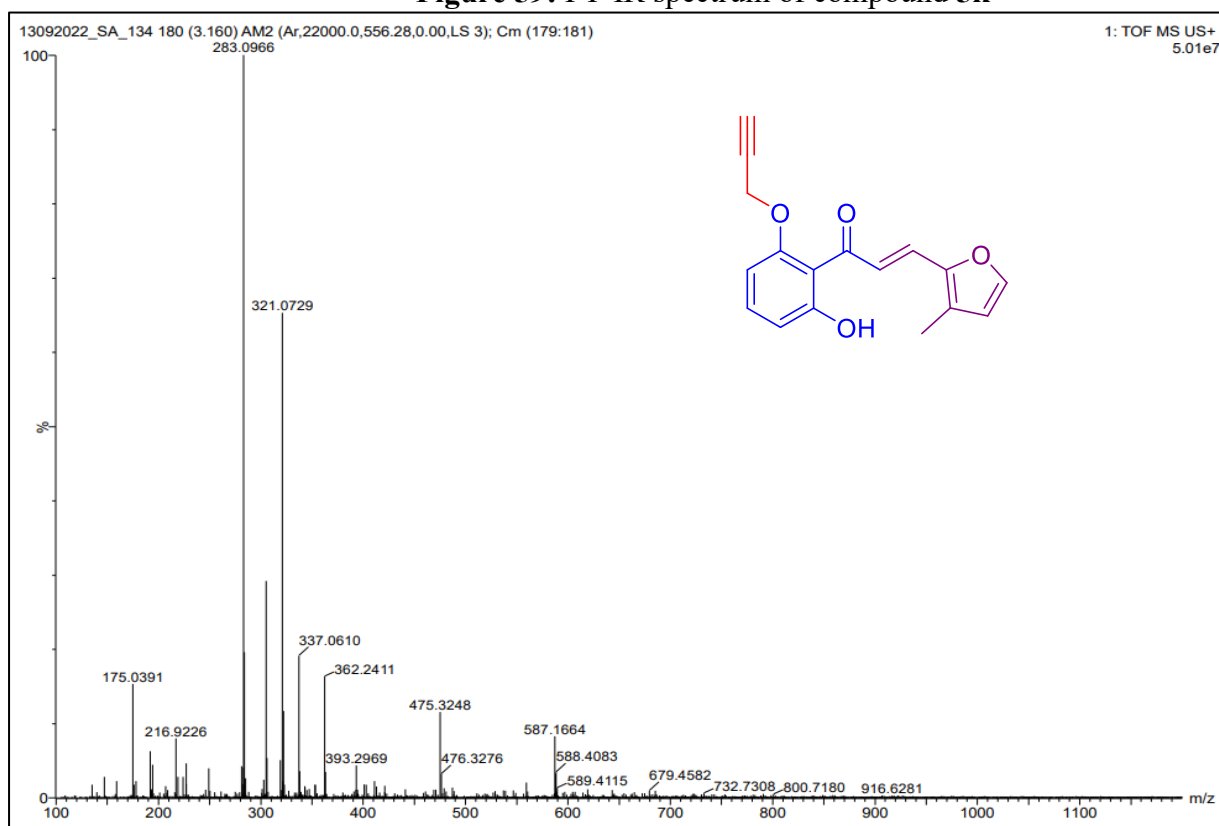**Figure 60:** HRMS spectrum of compound 5k

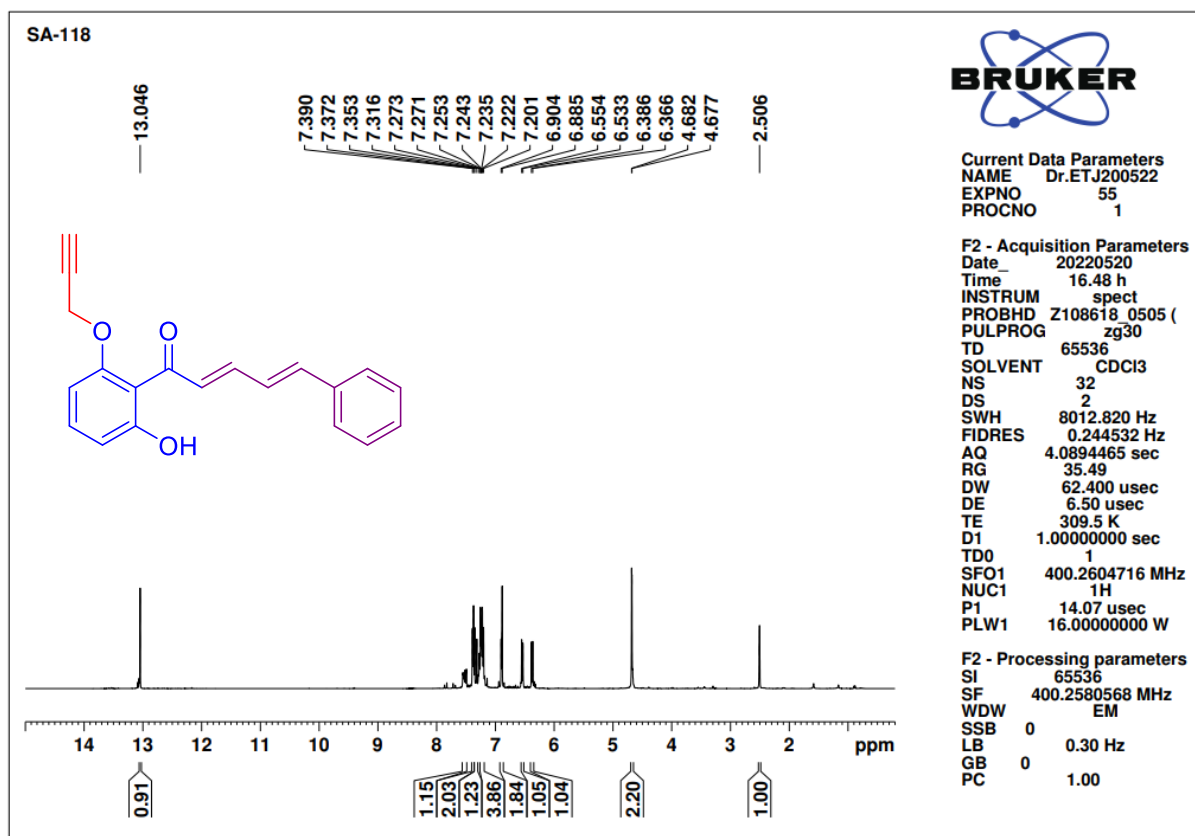Figure 61:  $^1\text{H}$  NMR spectrum of compound 5I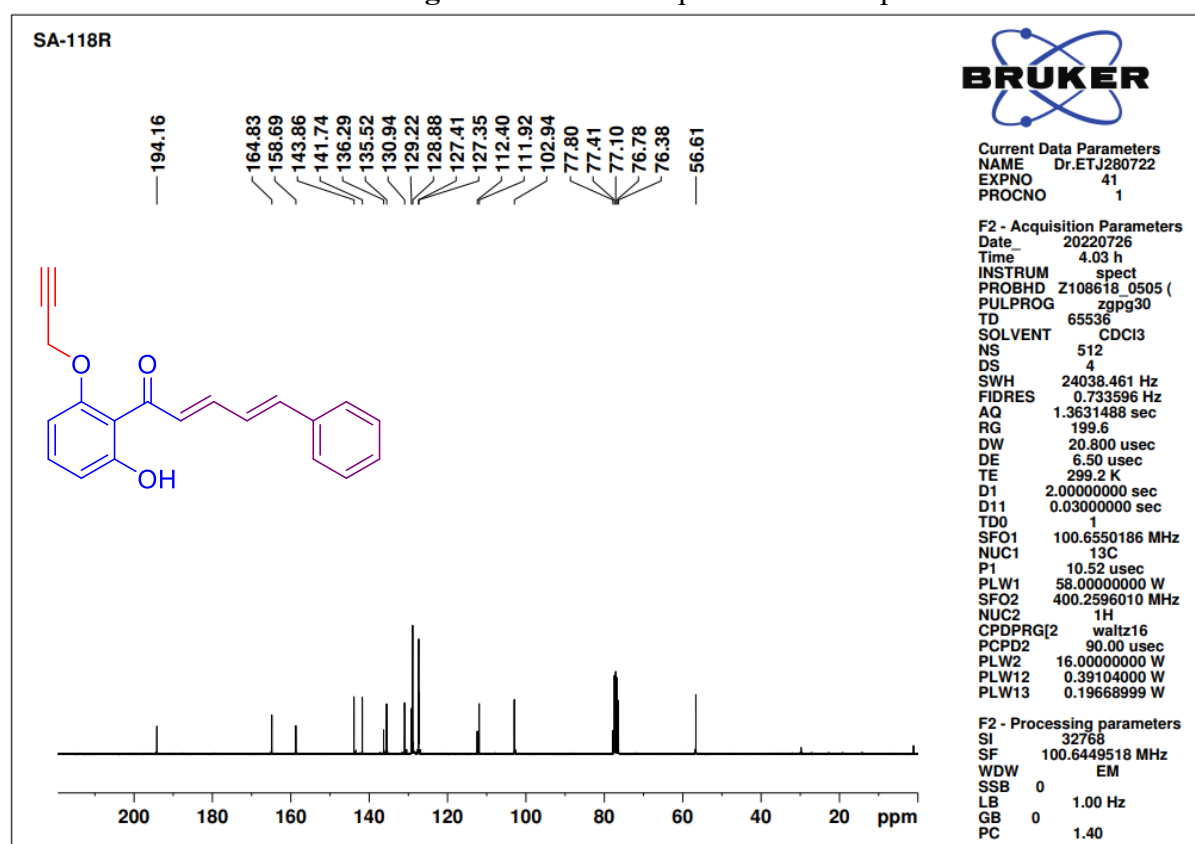Figure 62:  $^{13}\text{C}$  NMR spectrum of compound 5I



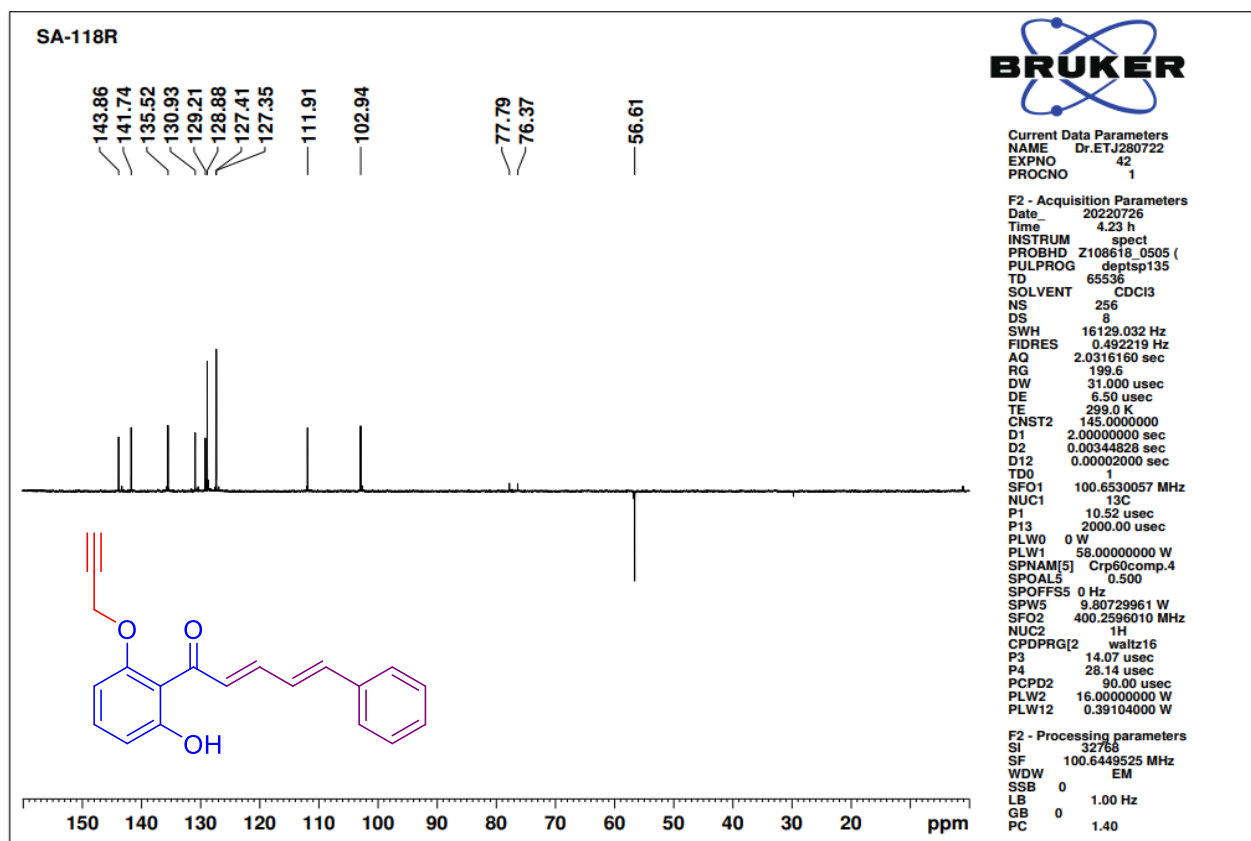

Figure 63: DEPT-135 NMR spectrum of compound 5I

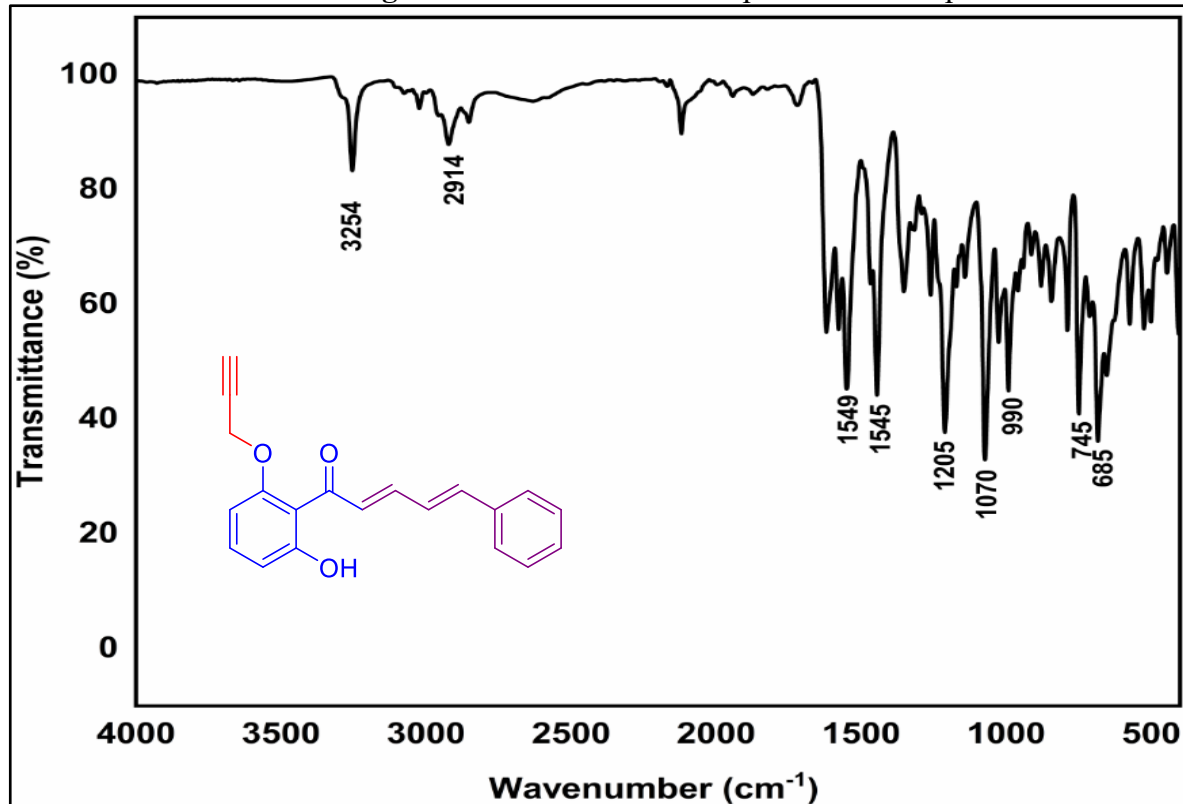

Figure 64: FT-IR spectrum of compound 5I

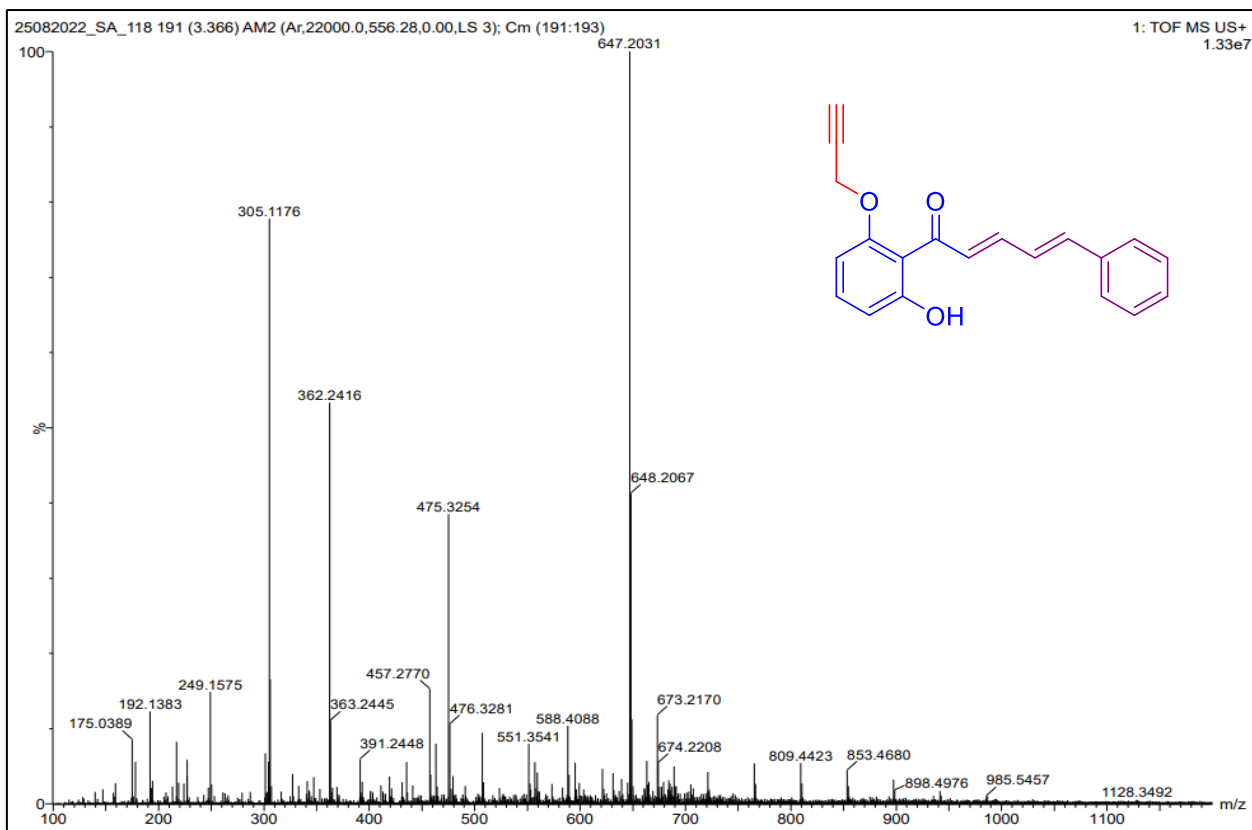

Figure 65: HRMS spectrum of compound 5l

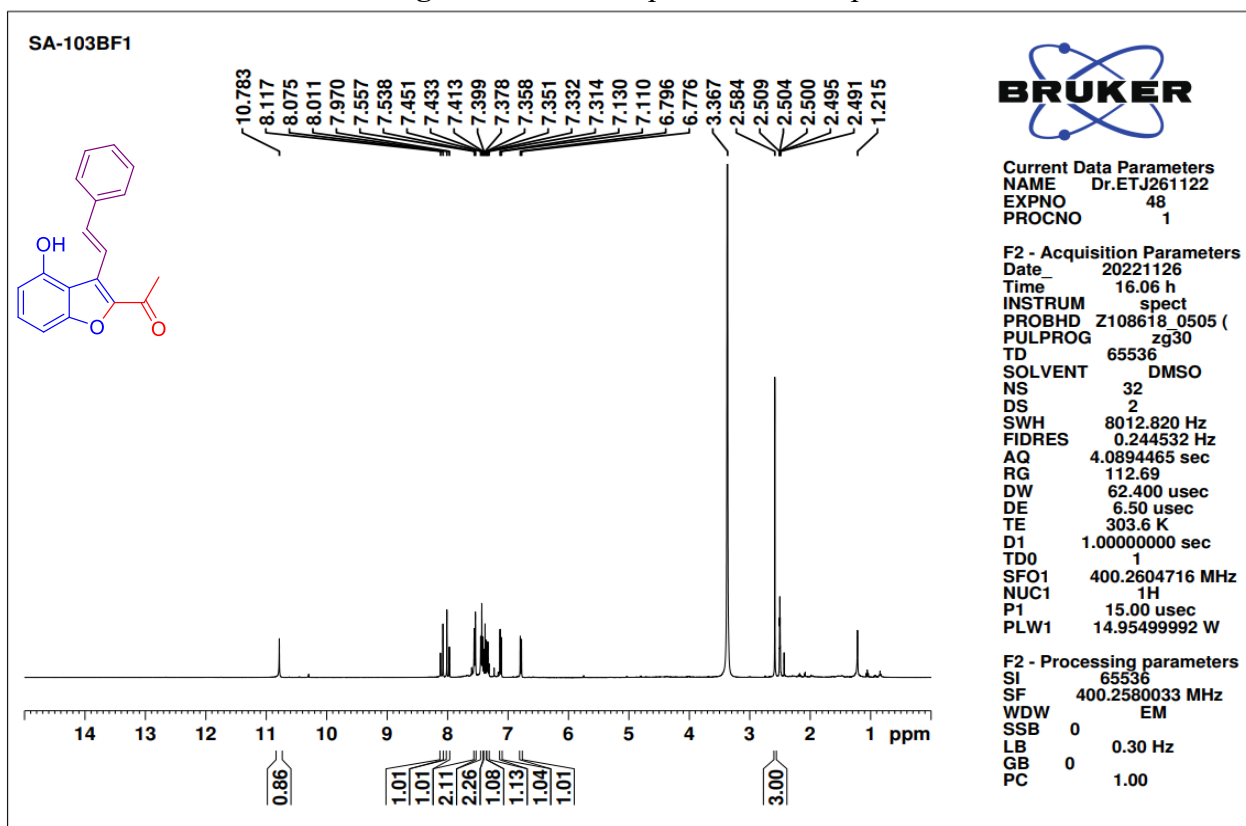Figure 66:  $^1\text{H}$  NMR spectrum of compound 6a

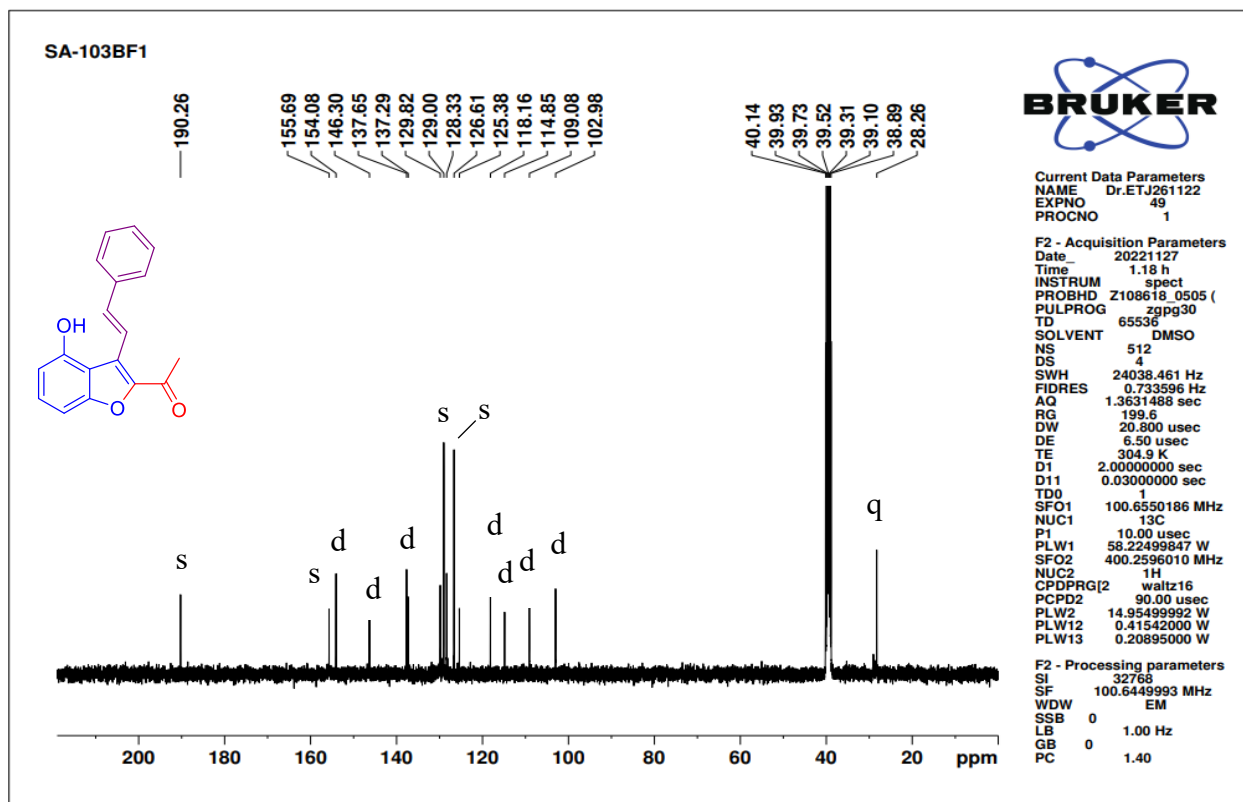Figure 67:  $^{13}\text{C}$  NMR spectrum of compound 6a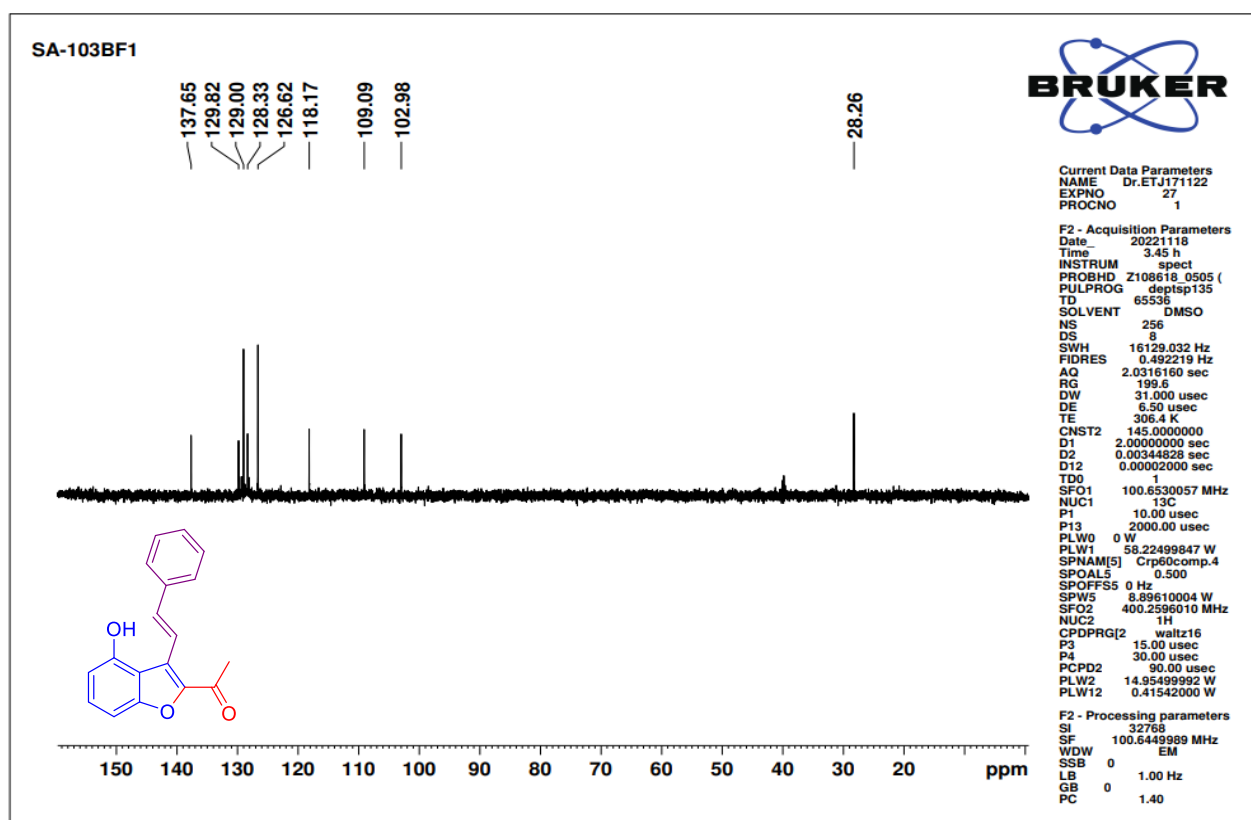

Figure 68: DEPT-135 NMR spectrum of compound 6a

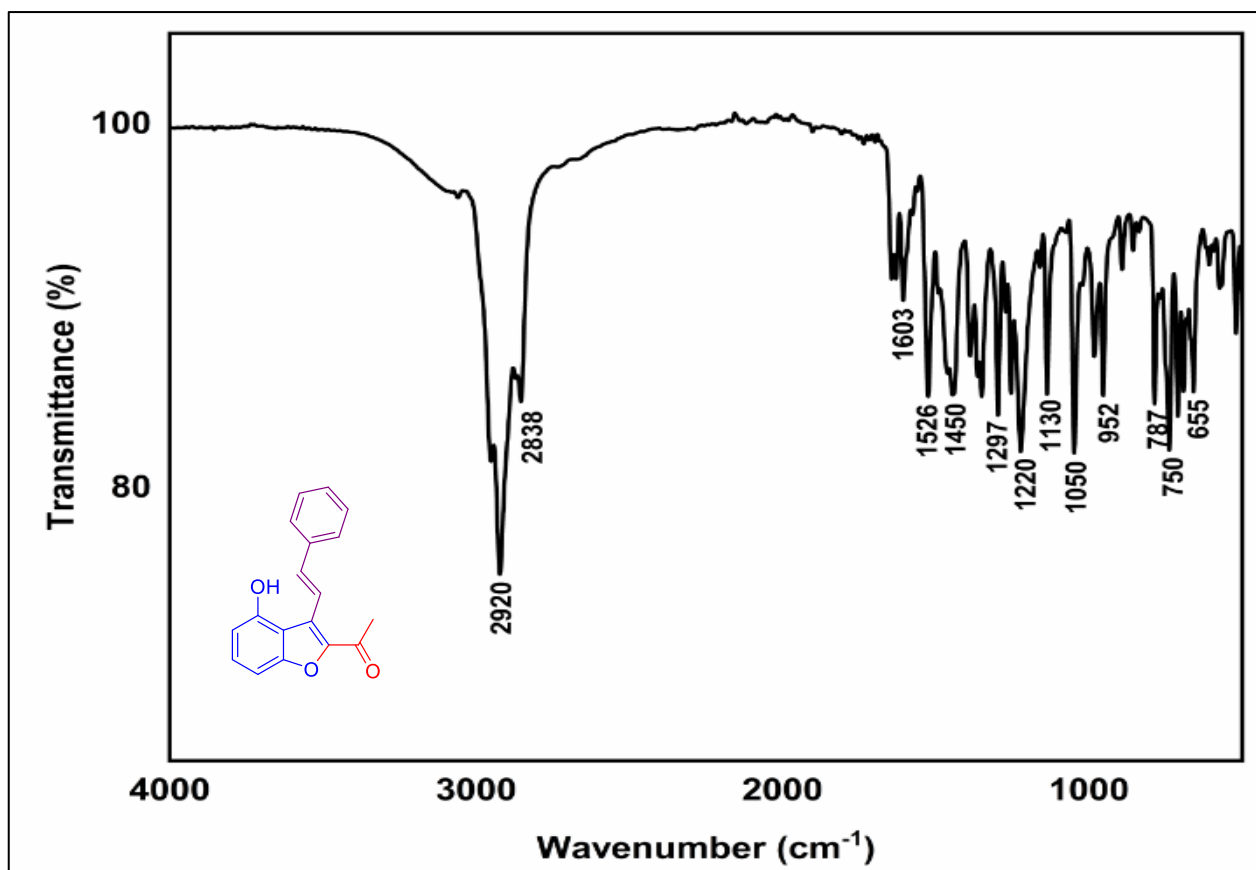

Figure 69: FT-IR spectrum of compound 6a

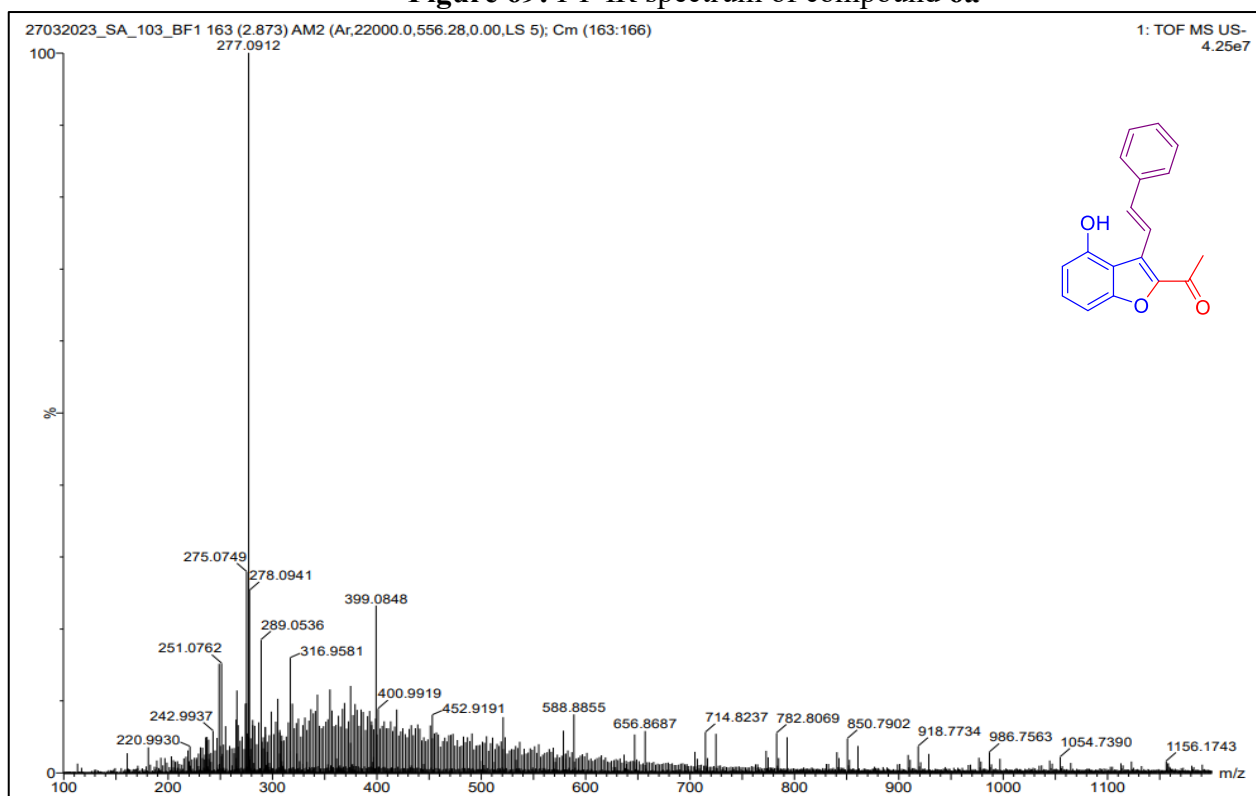

Figure 70: HRMS spectrum of compound 6a

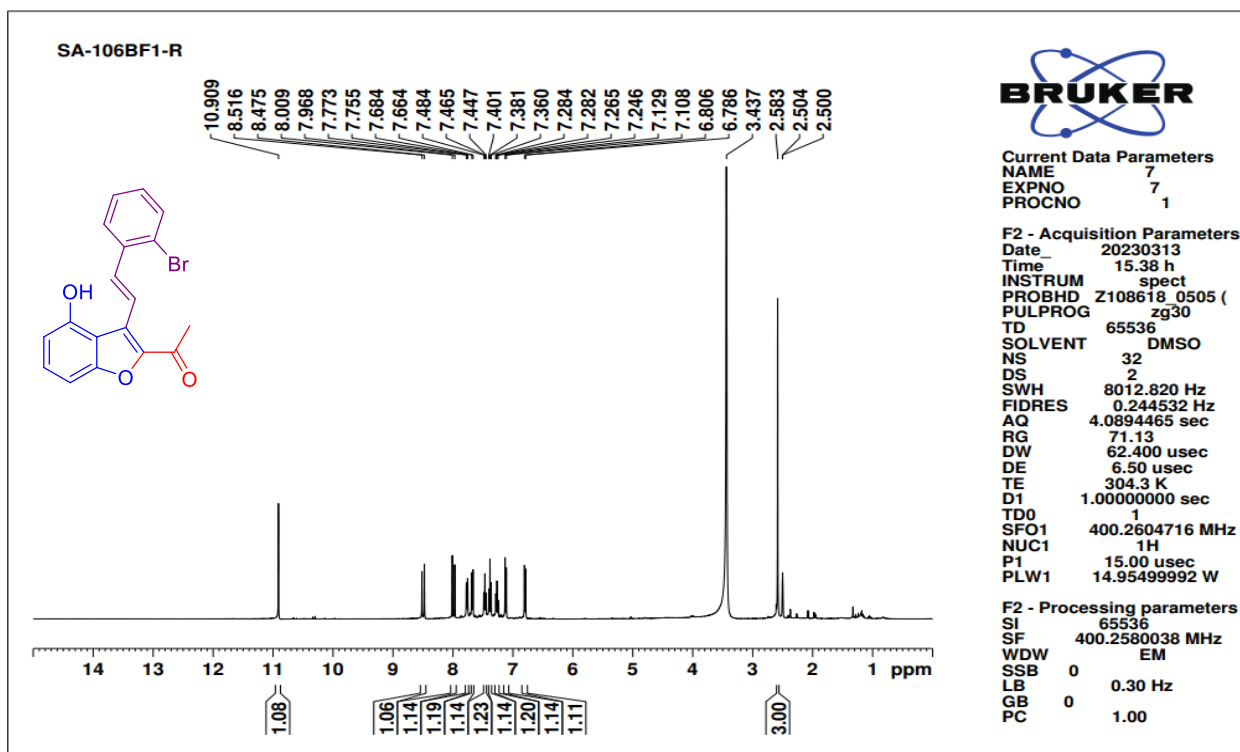Figure 71:  $^1\text{H}$  NMR spectrum of compound **6b**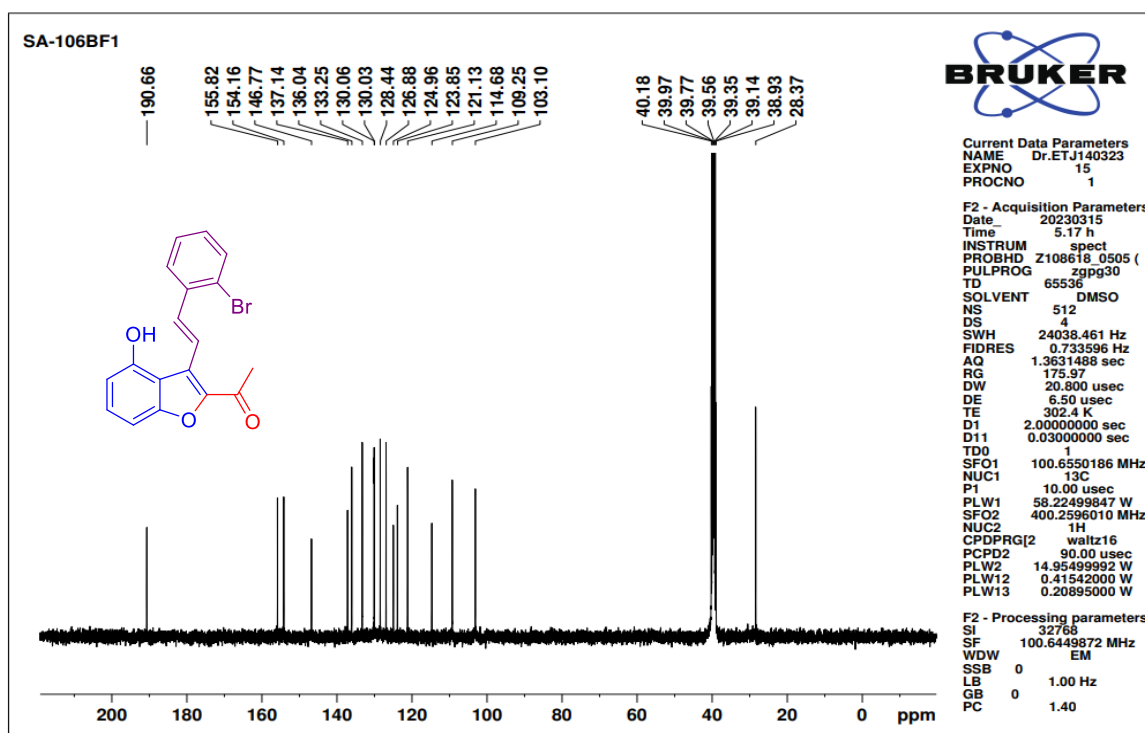Figure 72:  $^{13}\text{C}$  NMR spectrum of compound **6b**

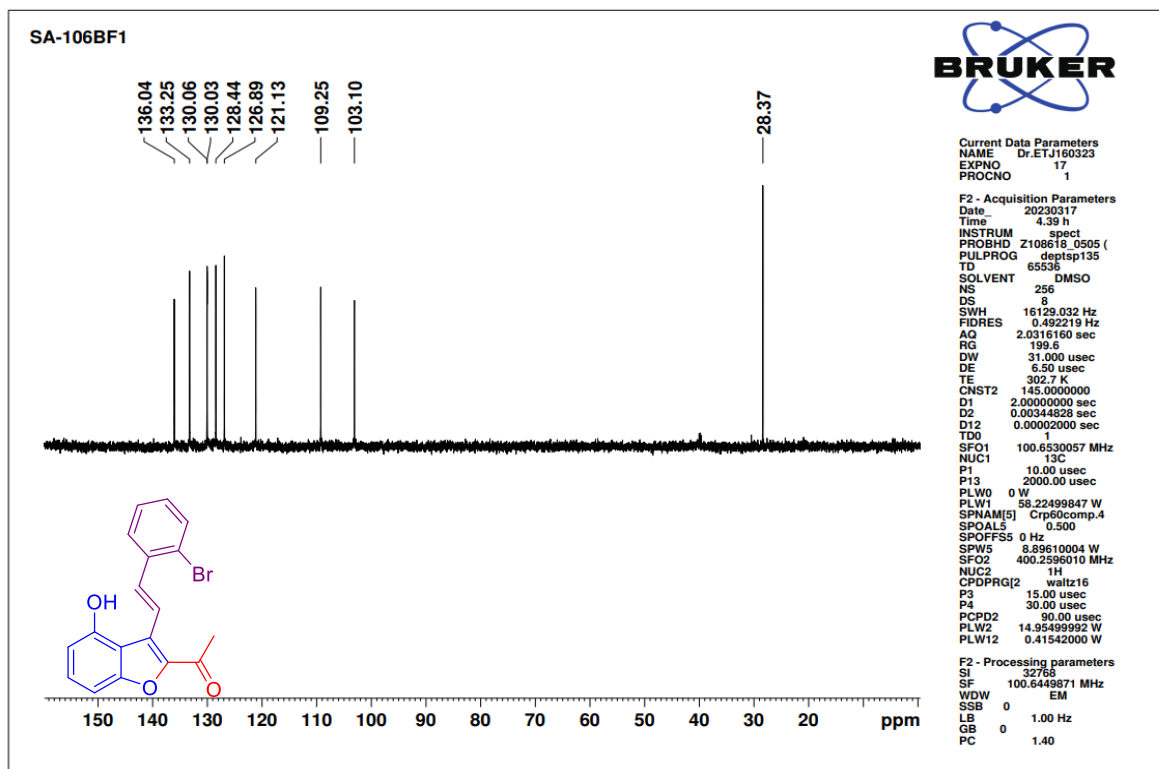Figure 73: DEPT-135 NMR spectrum of compound **6b**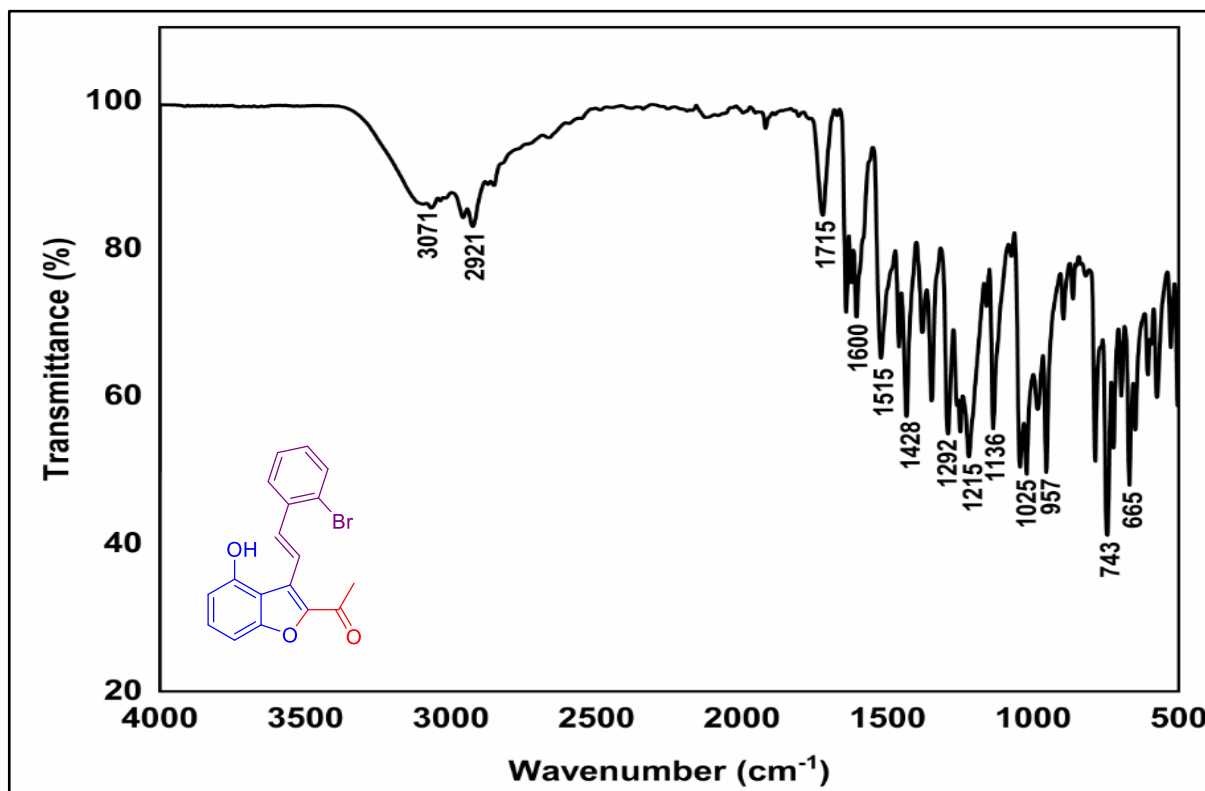Figure 74: FT-IR spectrum of compound **6b**

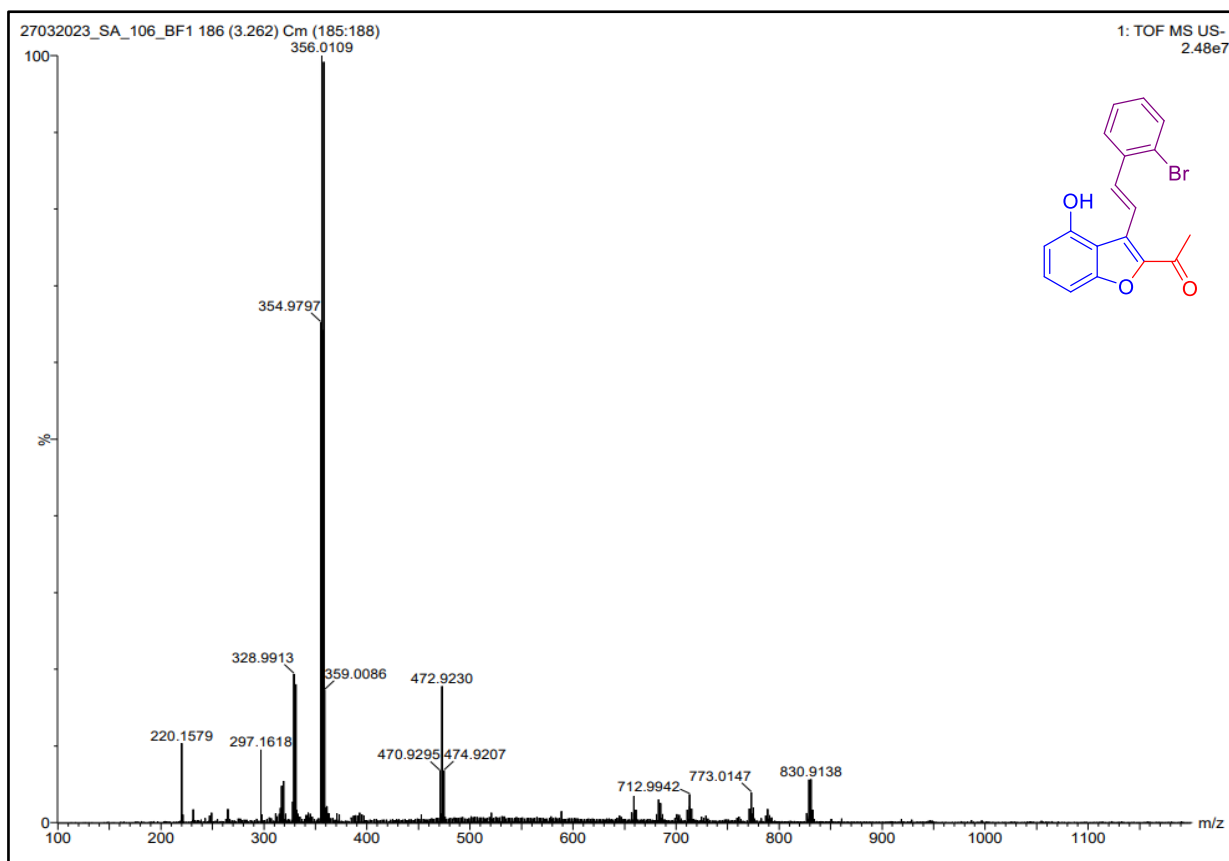

Figure 75: HRMS spectrum of compound 6b

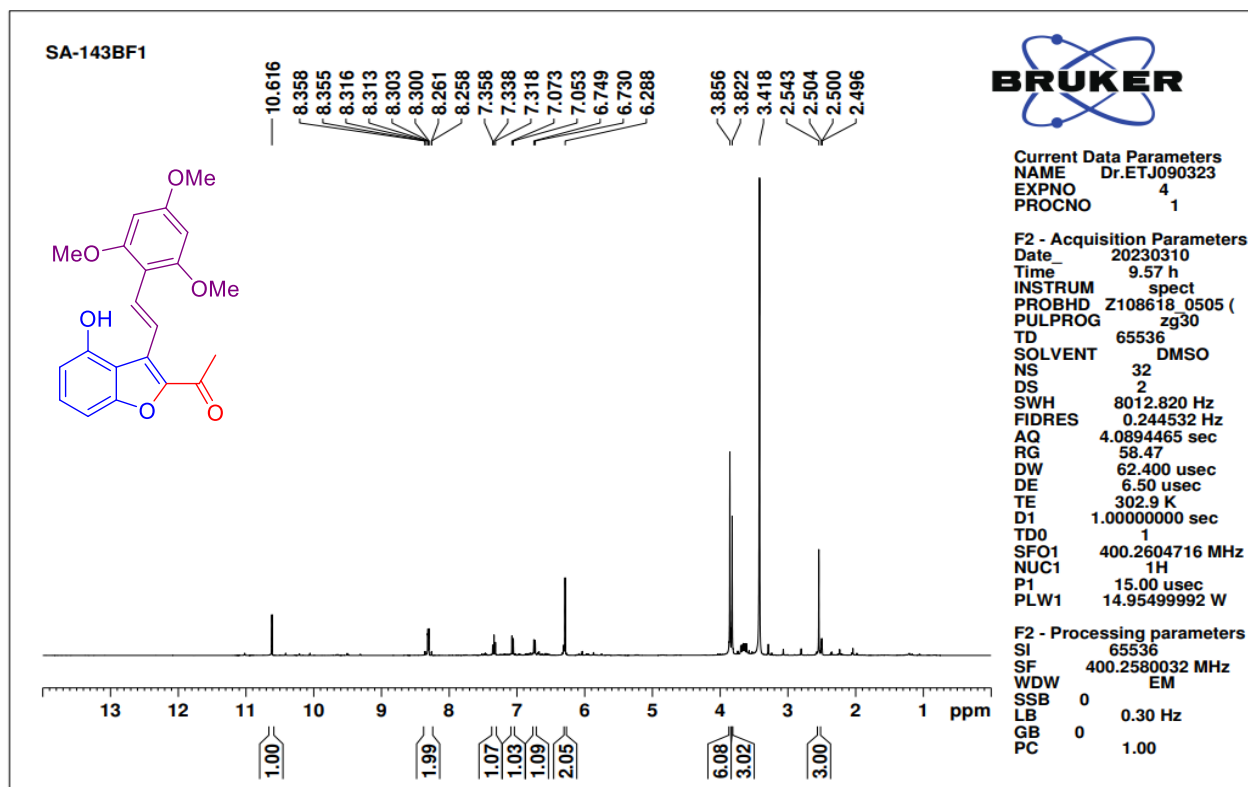Figure 76:  $^1\text{H}$  NMR spectrum of compound 6c

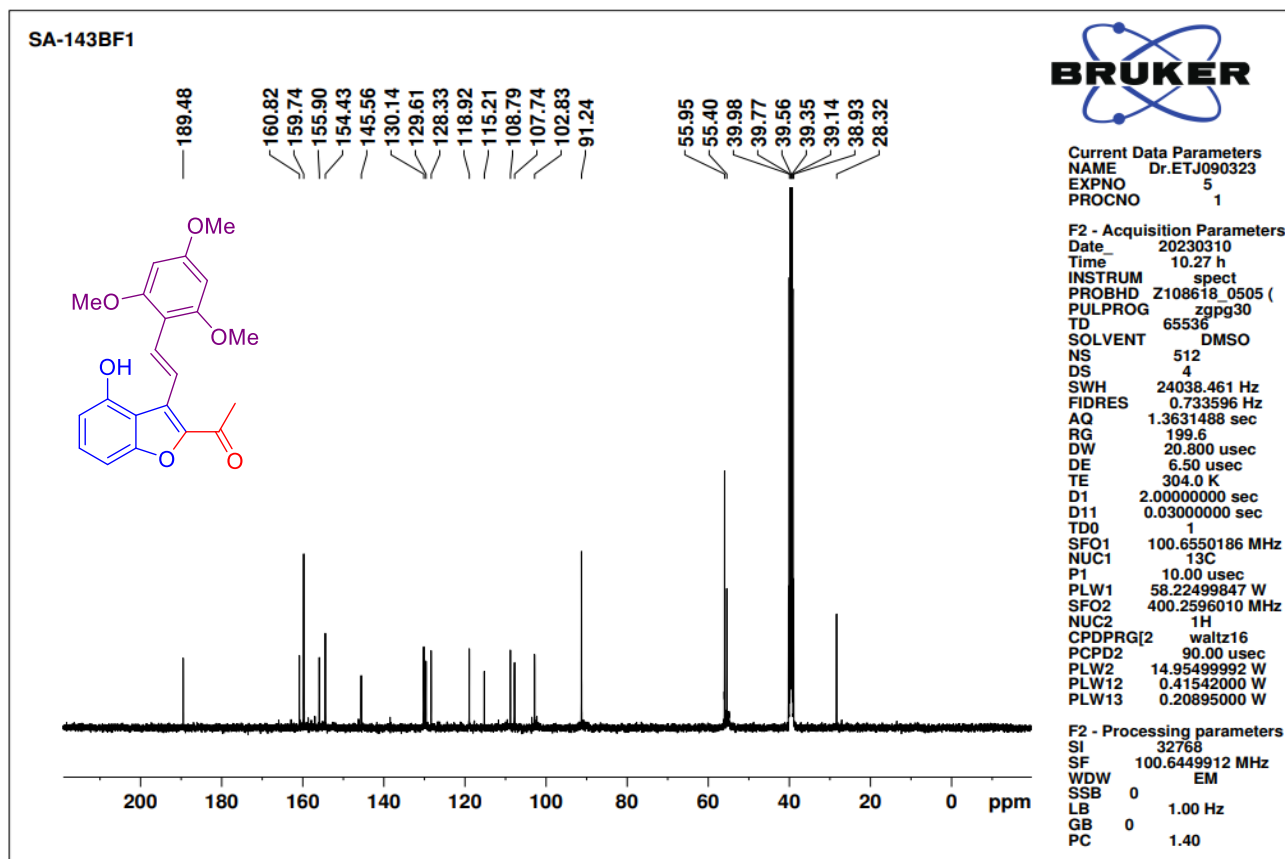Figure 77:  $^{13}\text{C}$  NMR spectrum of compound 6c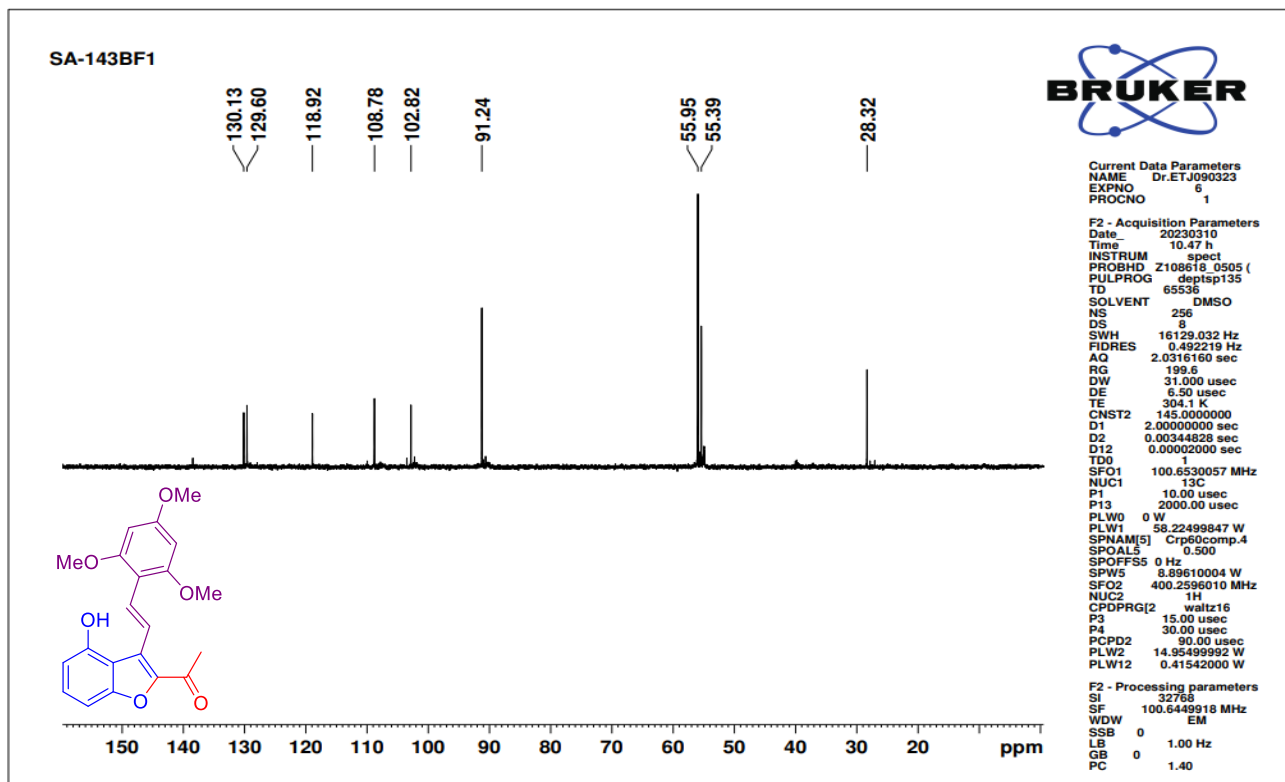

Figure 78: DEPT-135 NMR spectrum of compound 6c



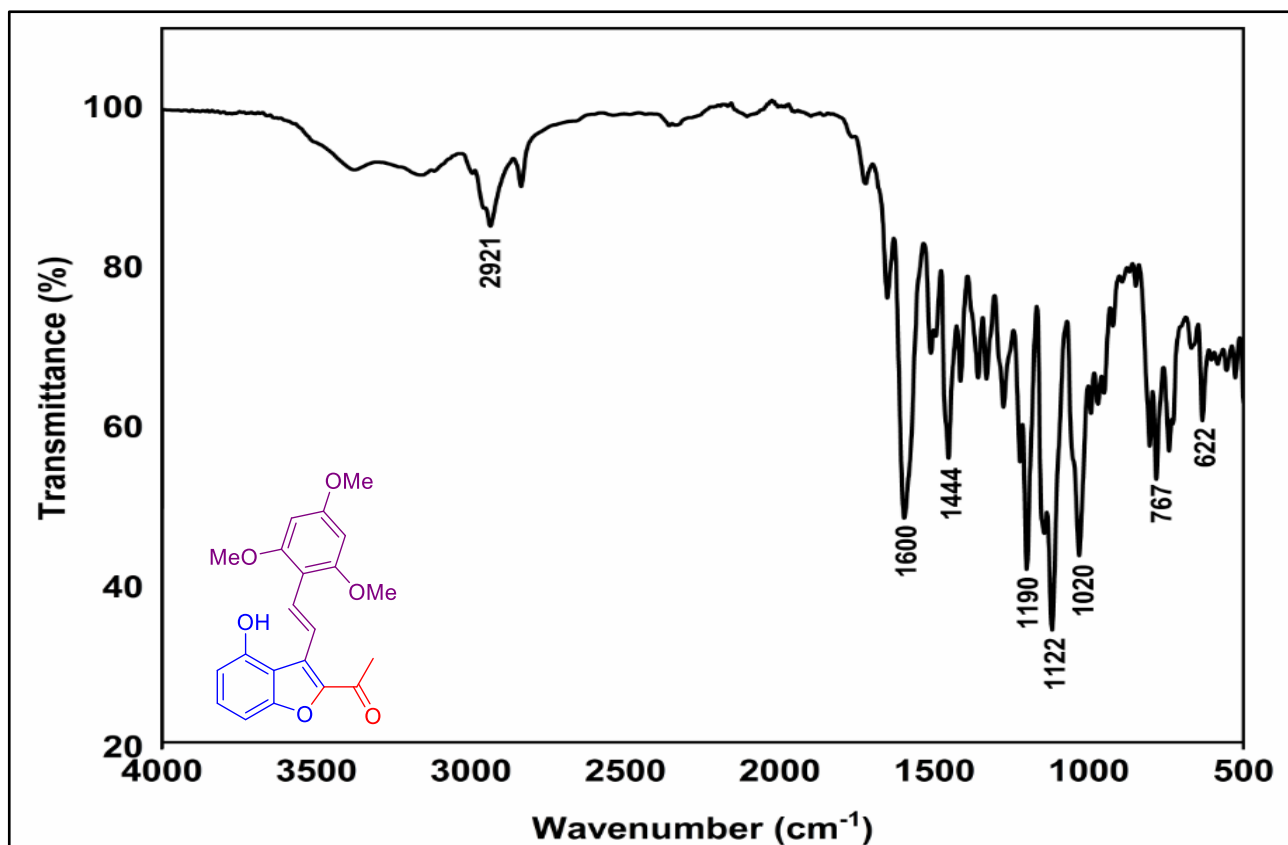

Figure 79: FT-IR spectrum of compound 6c

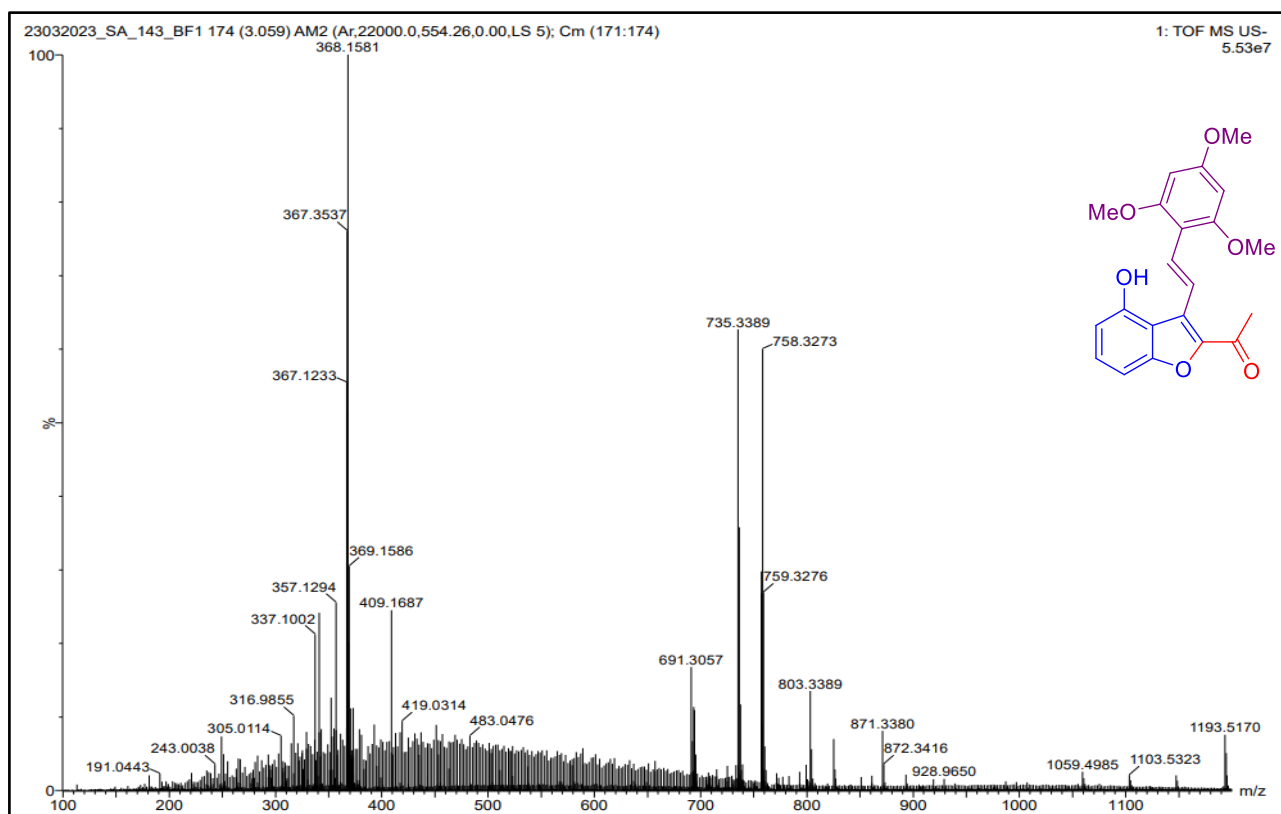

Figure 80: HRMS spectrum of compound 6c

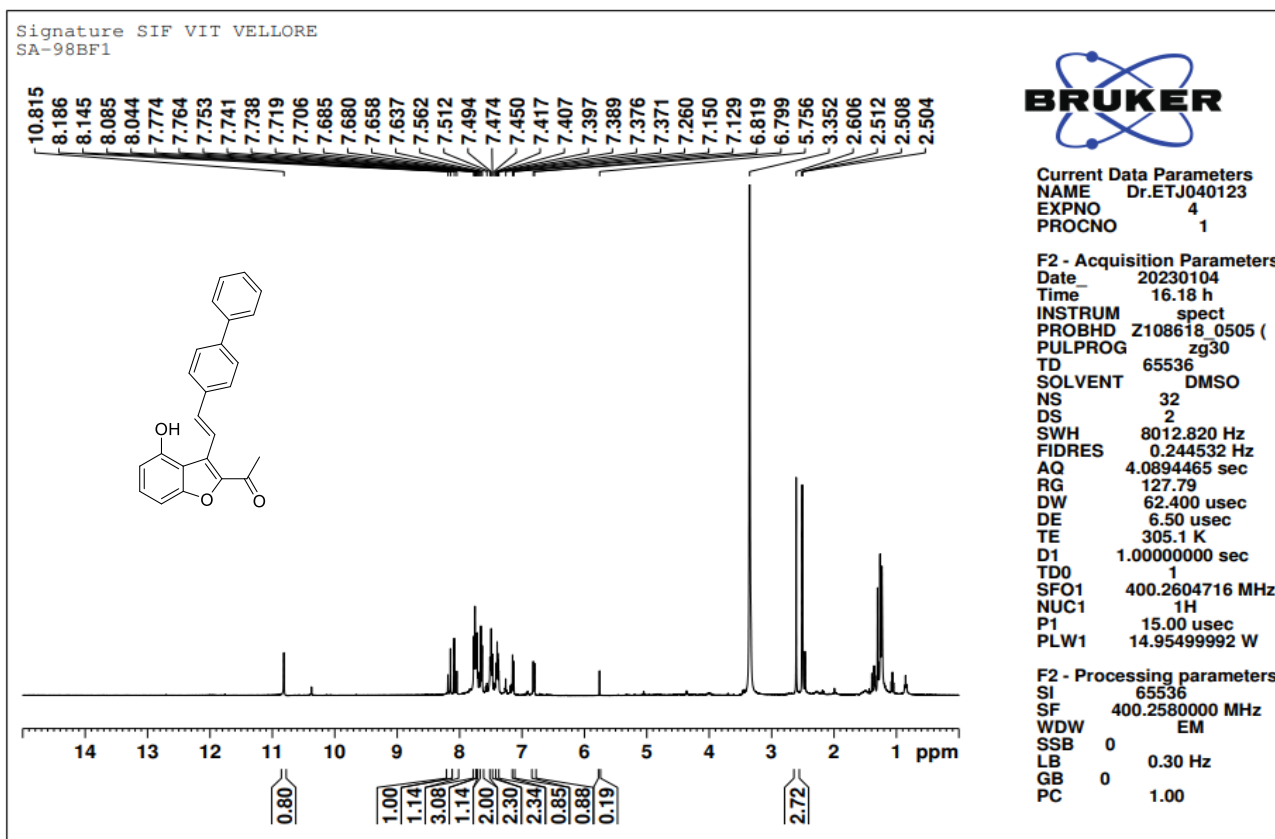Figure 81:  $^1\text{H}$  NMR spectrum of compound 6d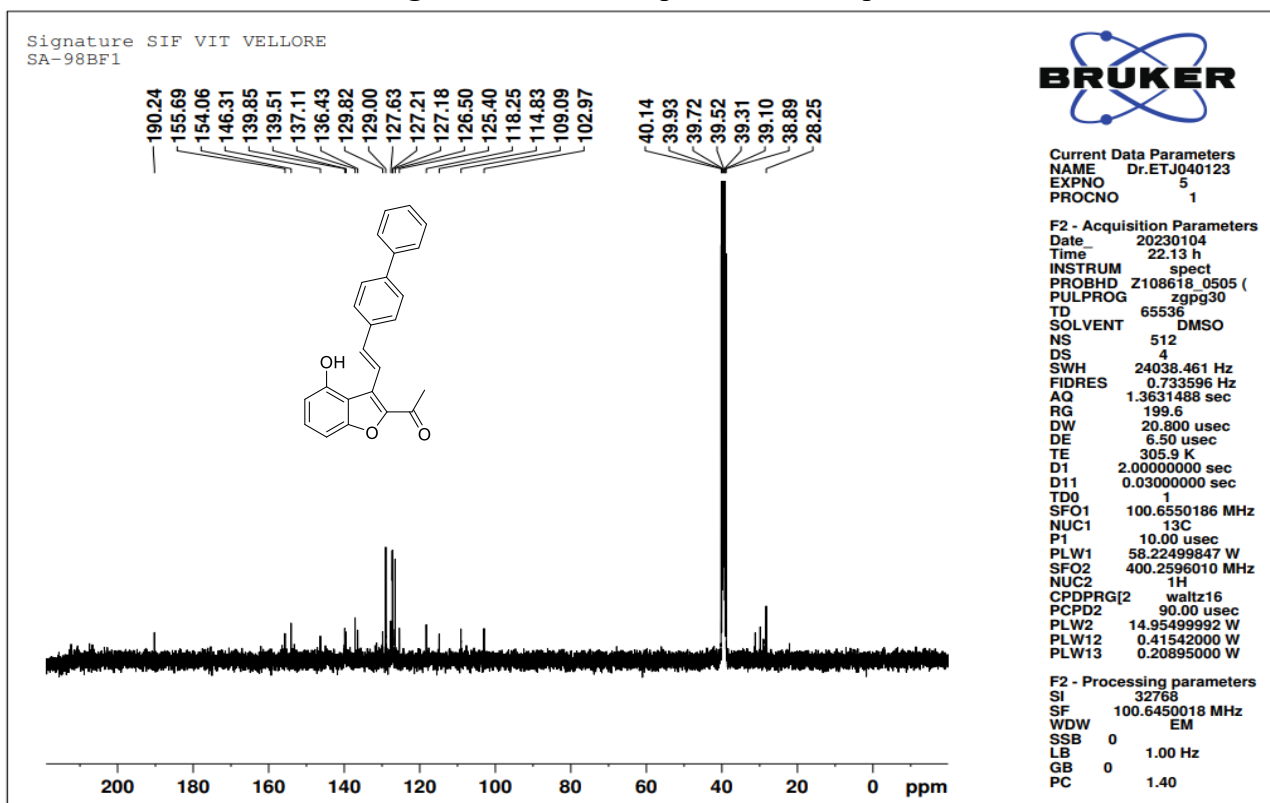Figure 82:  $^{13}\text{C}$  NMR spectrum of compound 6d

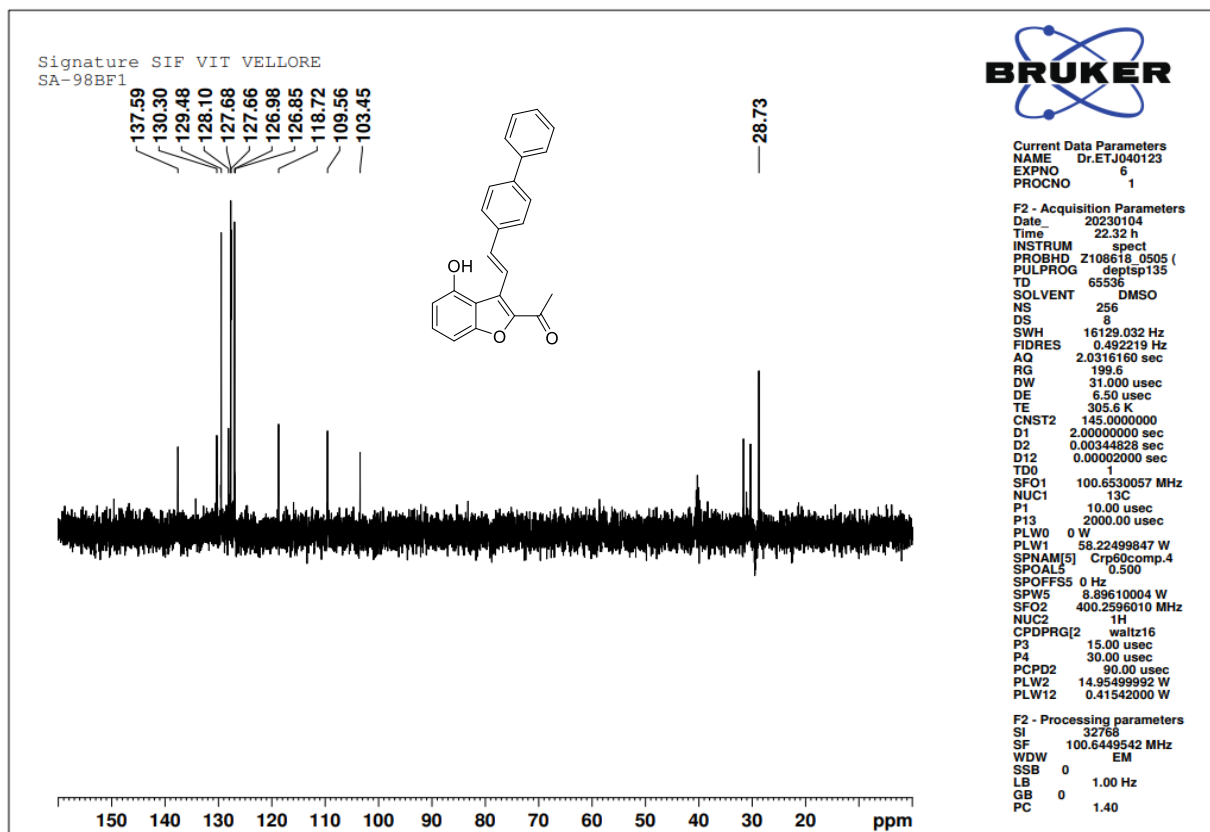

Figure 83: DEPT-135 NMR spectrum of compound 6d

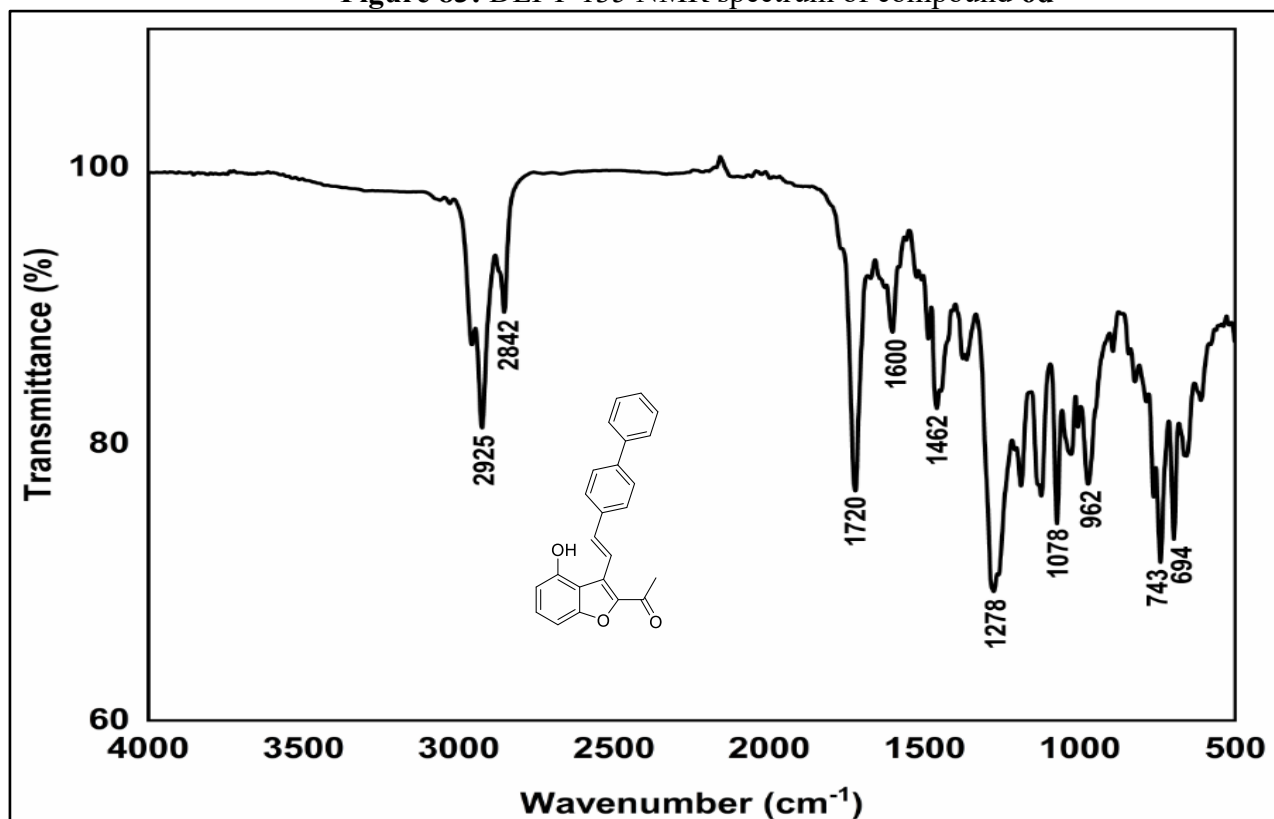

Figure 84: FT-IR spectrum of compound 6d

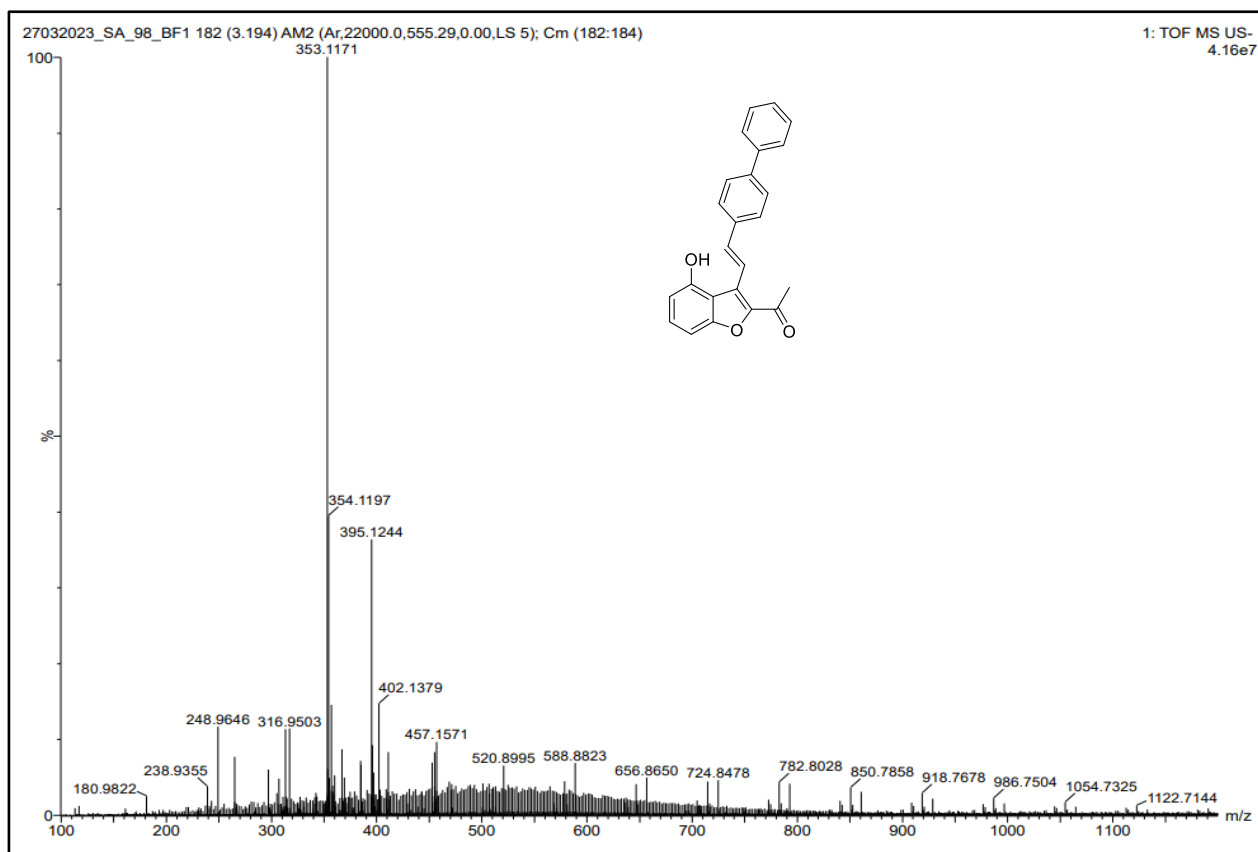

Figure 85: HRMS spectrum of compound 6d

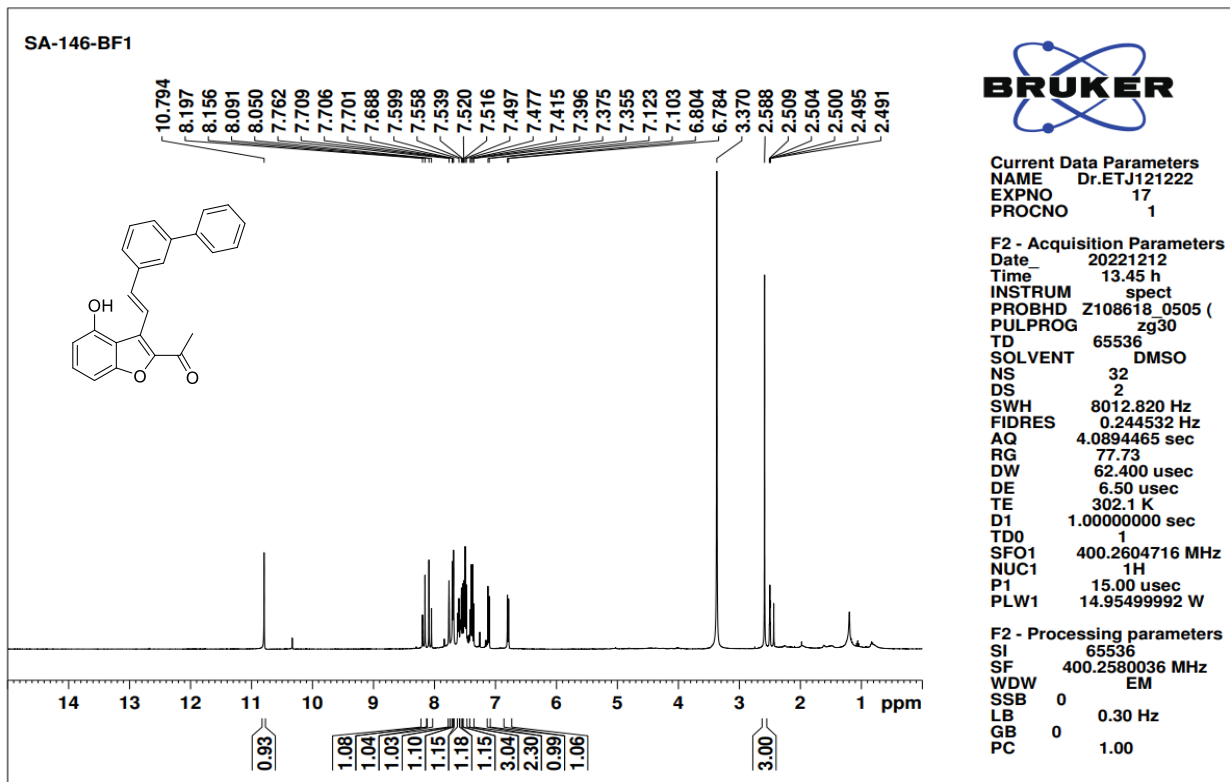Figure 86:  $^1\text{H}$  NMR spectrum of compound 6e

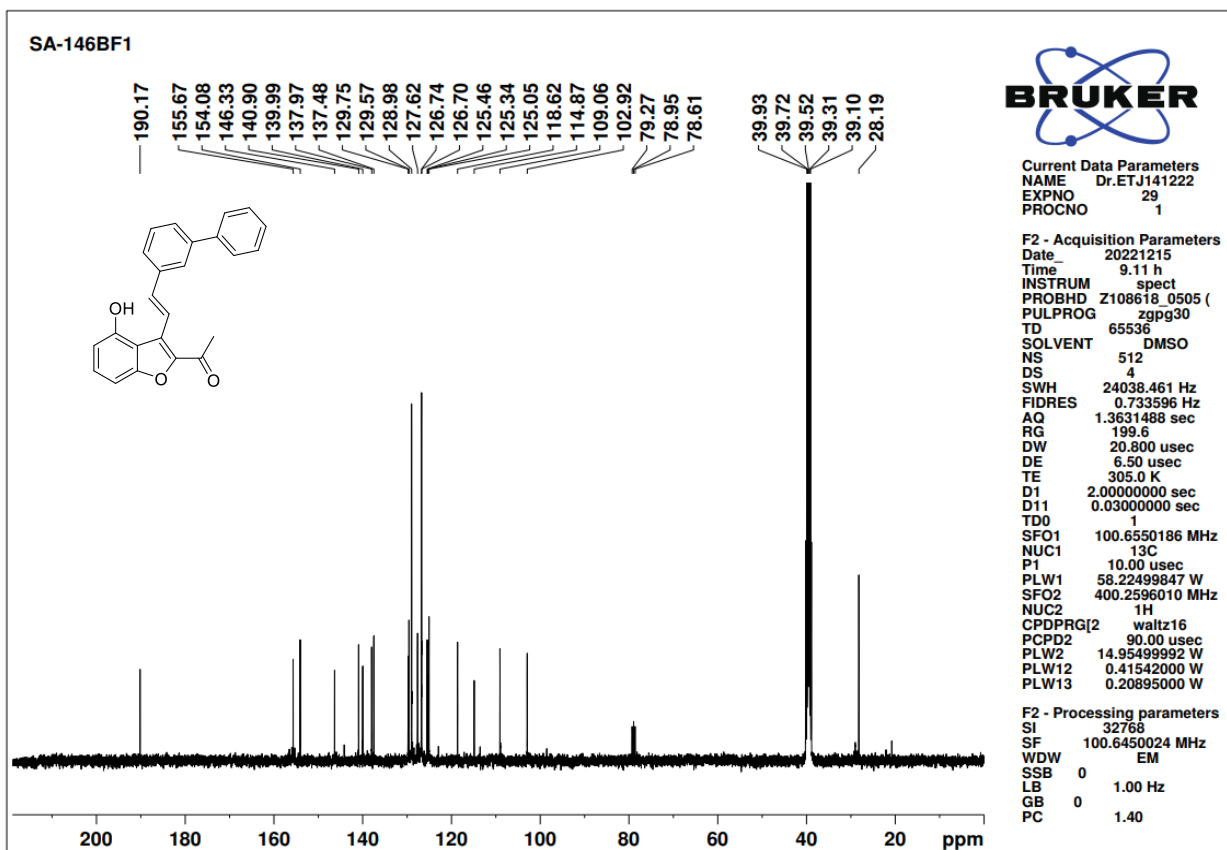Figure 87:  $^{13}\text{C}$  NMR spectrum of compound 6e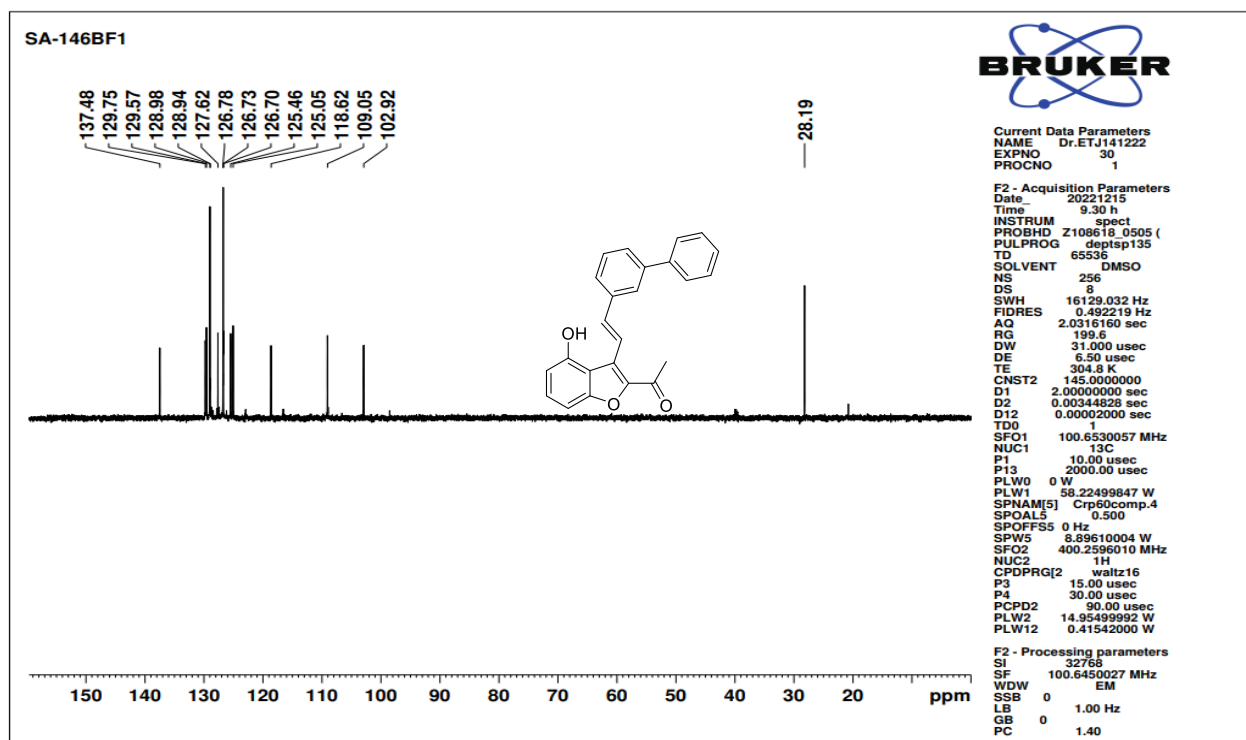

Figure 88: DEPT-135 NMR spectrum of compound 6e

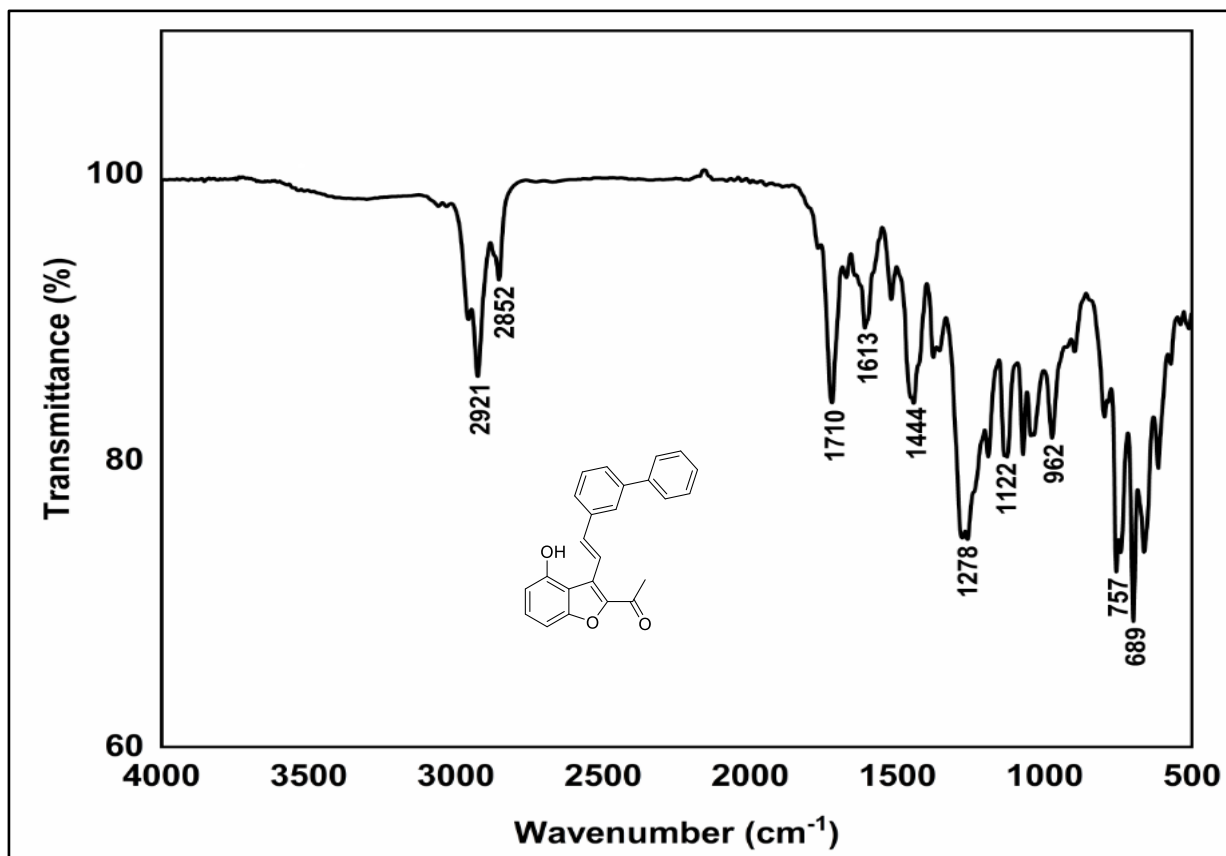**Figure 89:** FT-IR spectrum of compound **6e**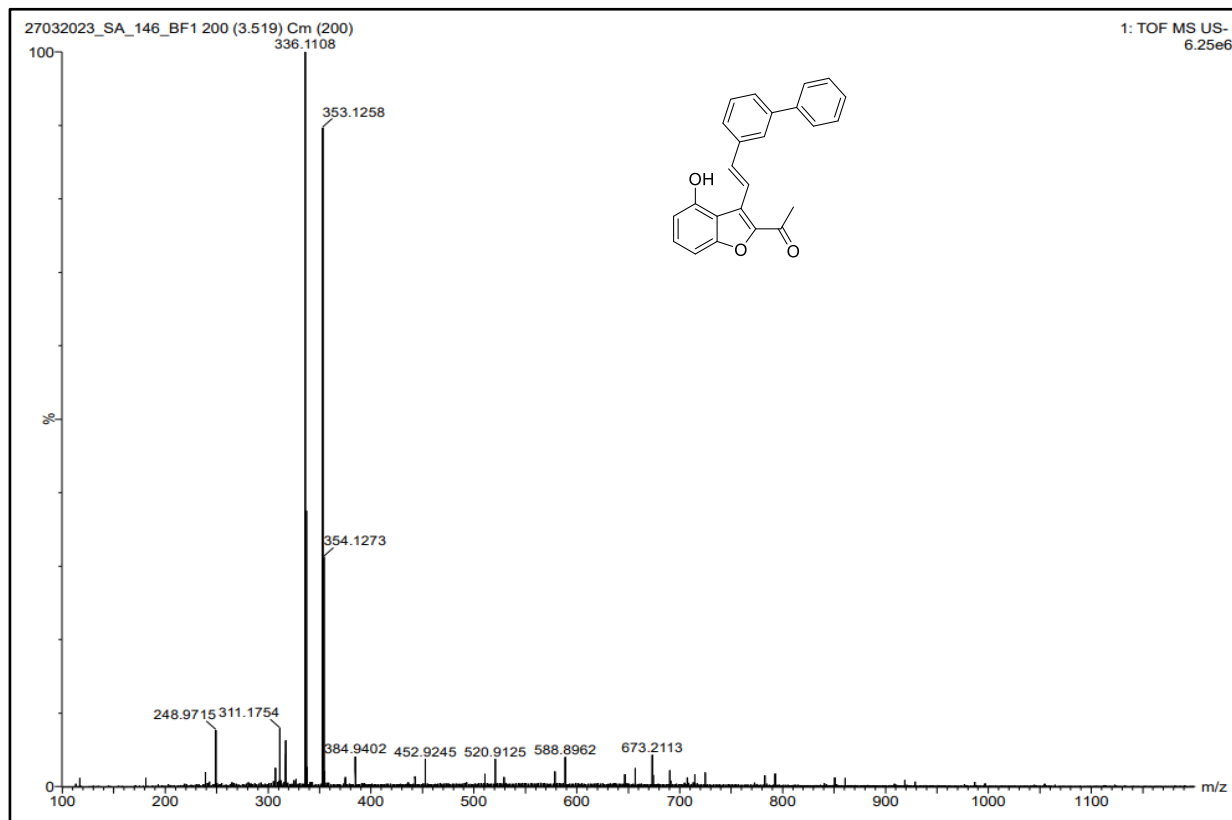**Figure 90:** HRMS spectrum of compound **6e**

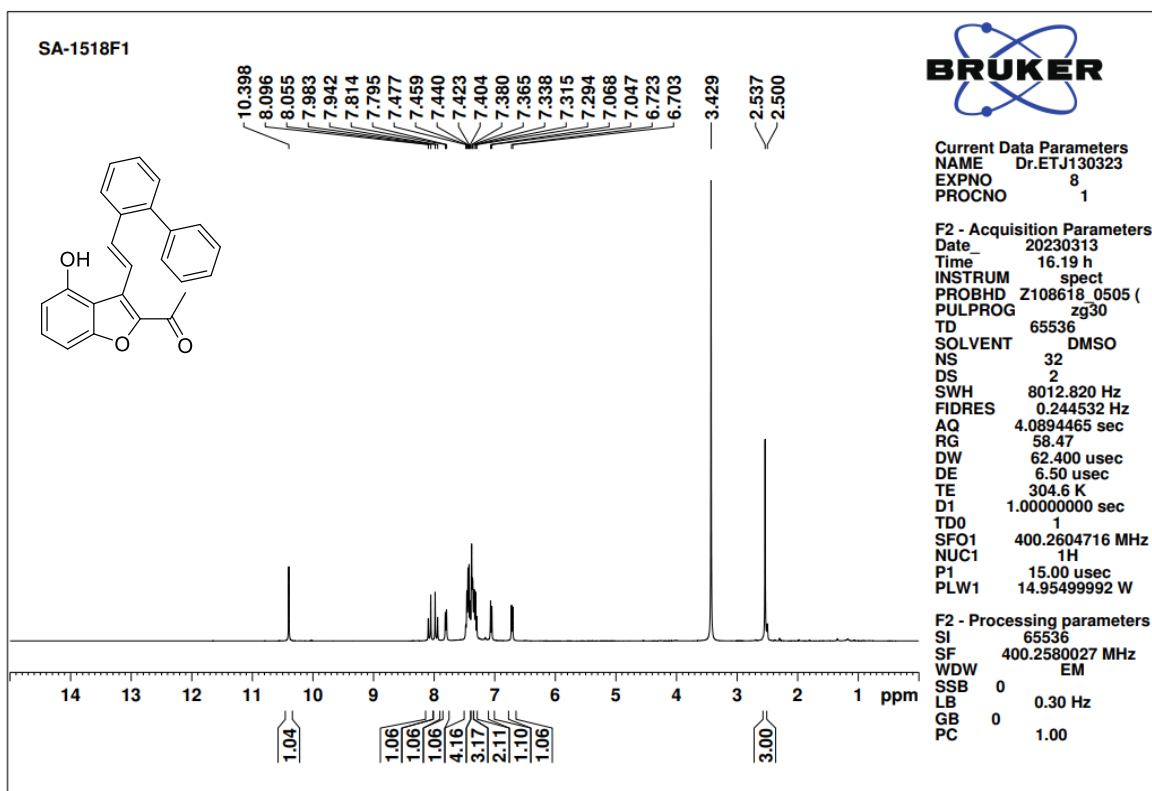Figure 91:  $^1\text{H}$  NMR spectrum of compound 6e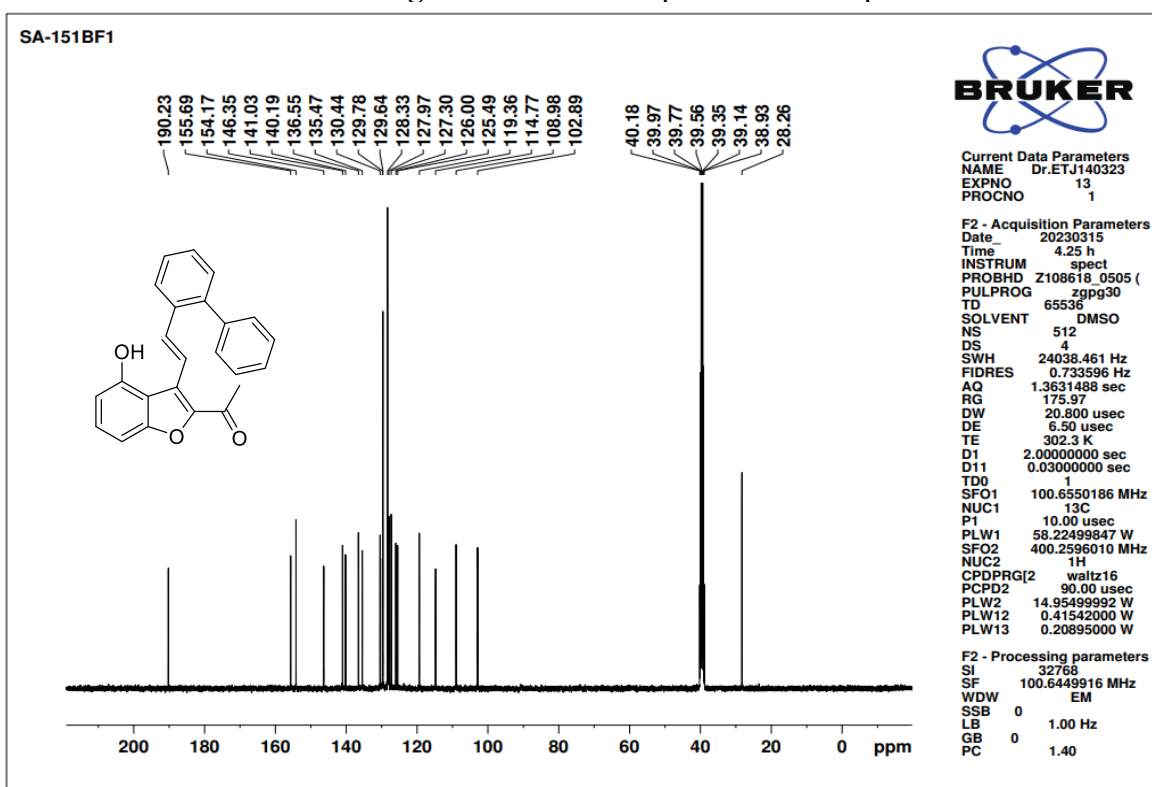Figure 92:  $^{13}\text{C}$  NMR spectrum of compound 6e

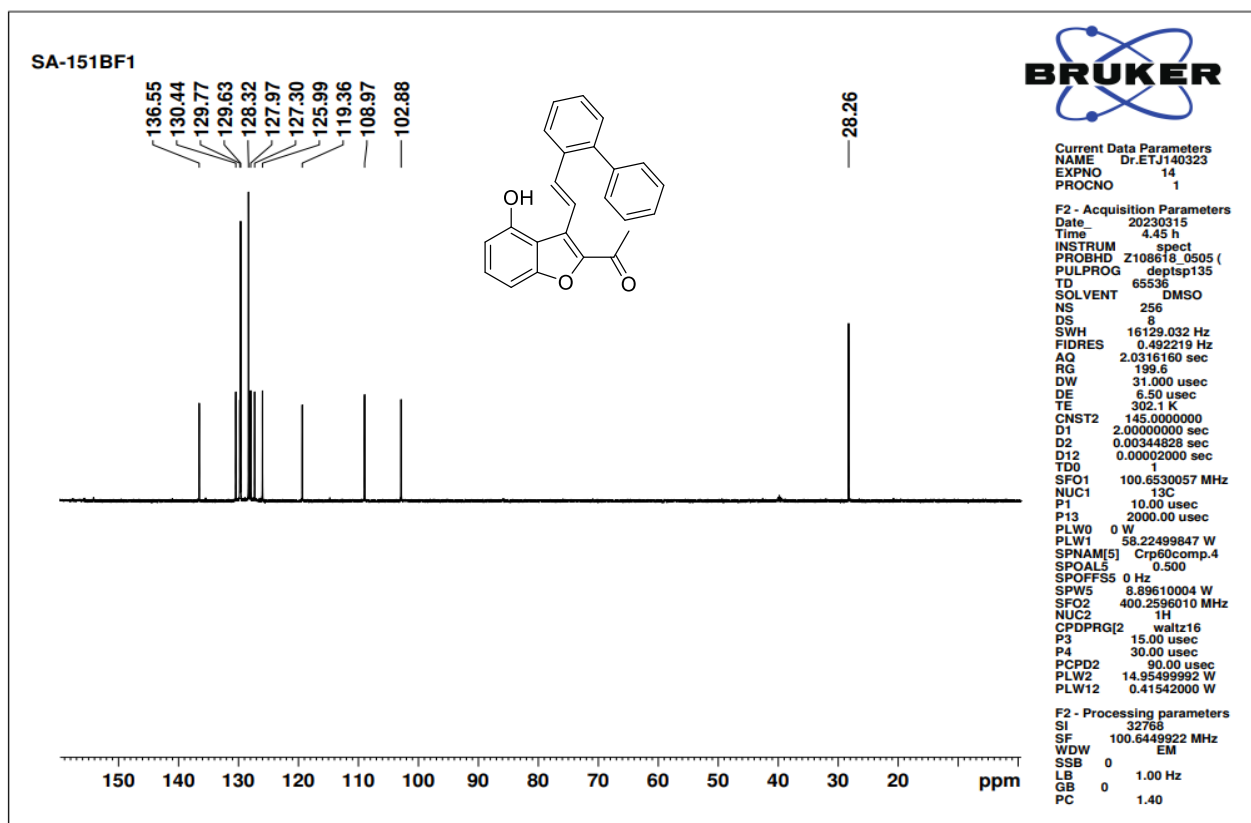

Figure 93: DEPT-135 NMR spectrum of compound 6e

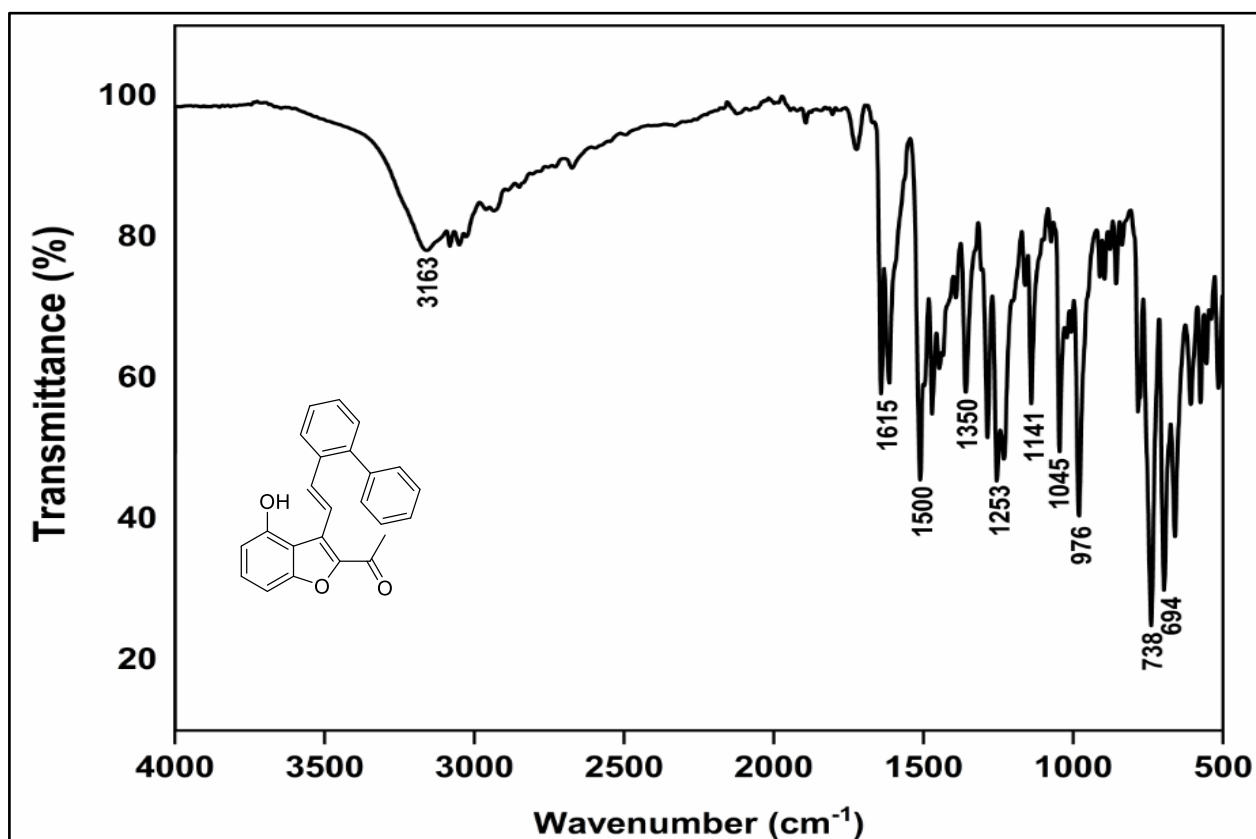

Figure 94: FT-IR spectrum of compound 6e



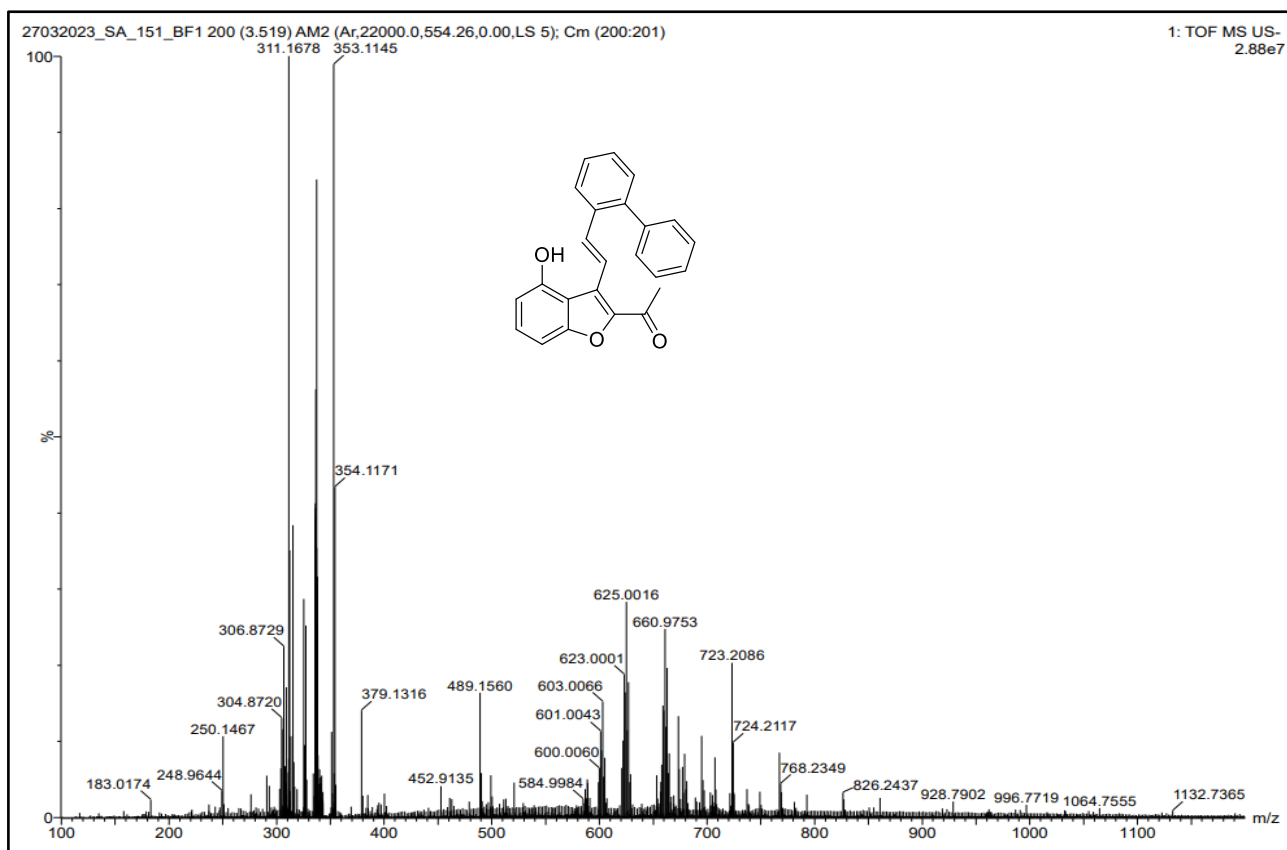

Figure 95: HRMS spectrum of compound 6e

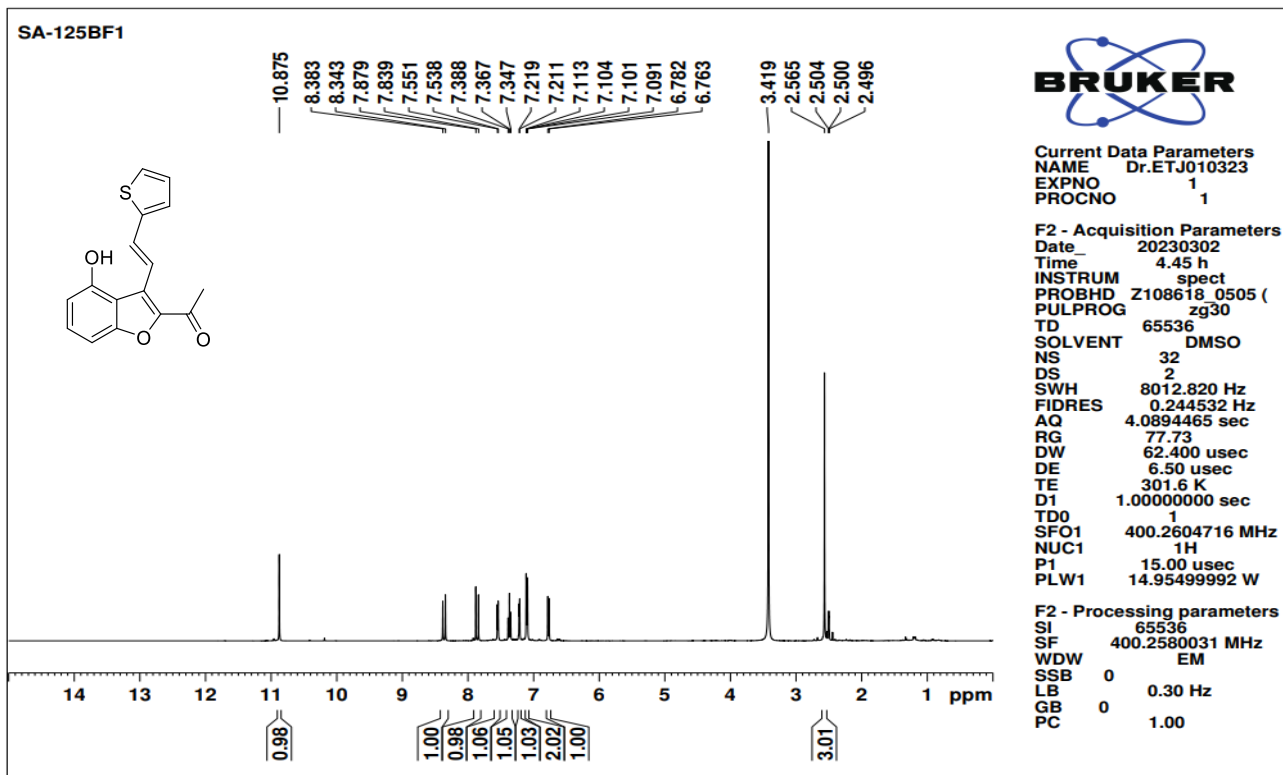Figure 96:  $^1\text{H}$  NMR spectrum of compound 6f

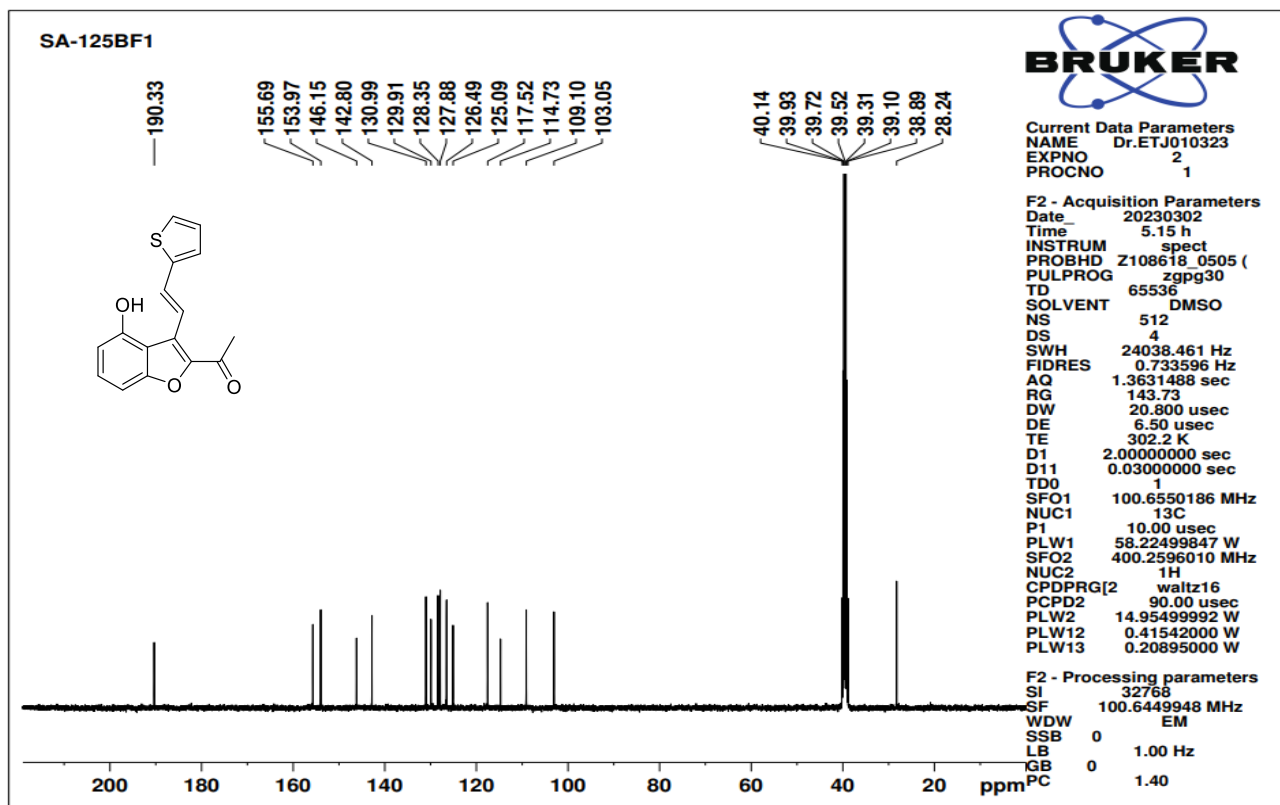Figure 97:  $^{13}\text{C}$  NMR spectrum of compound 6f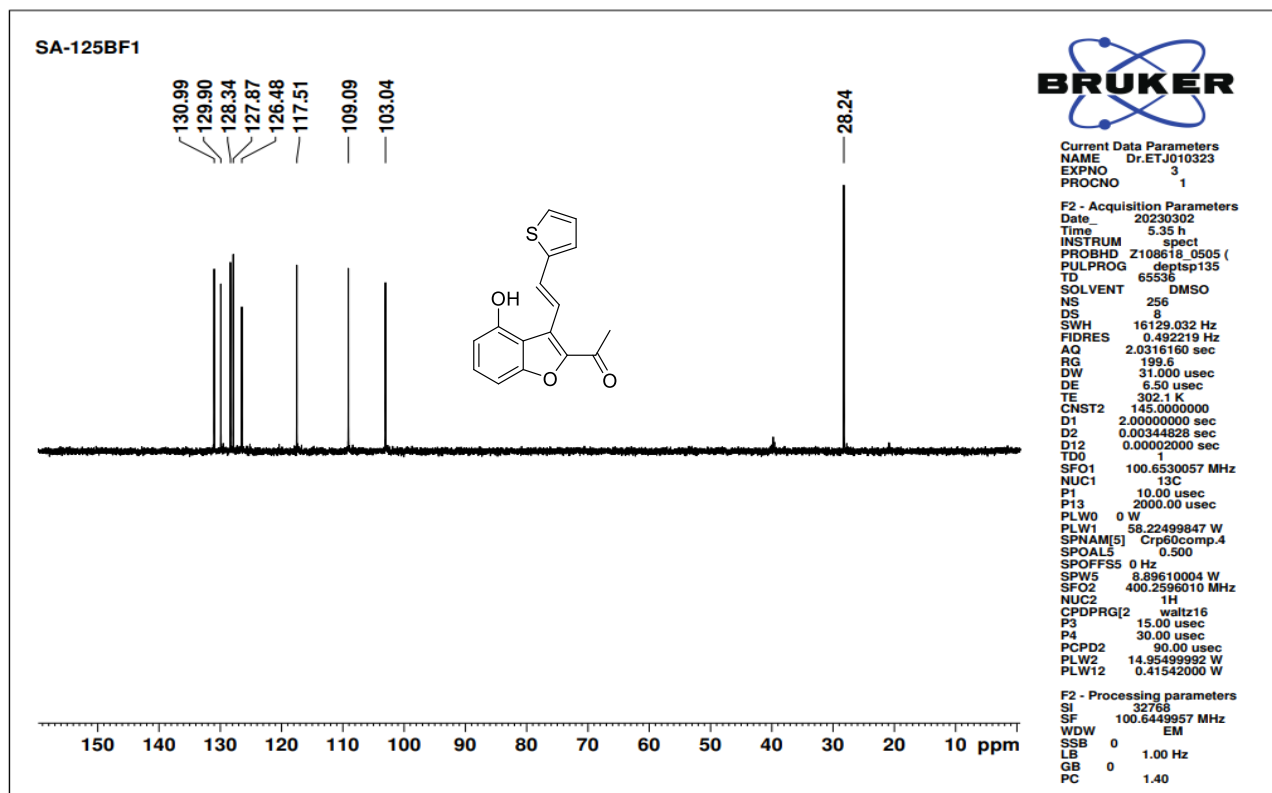

Figure 98: HRMS spectrum of compound 6f

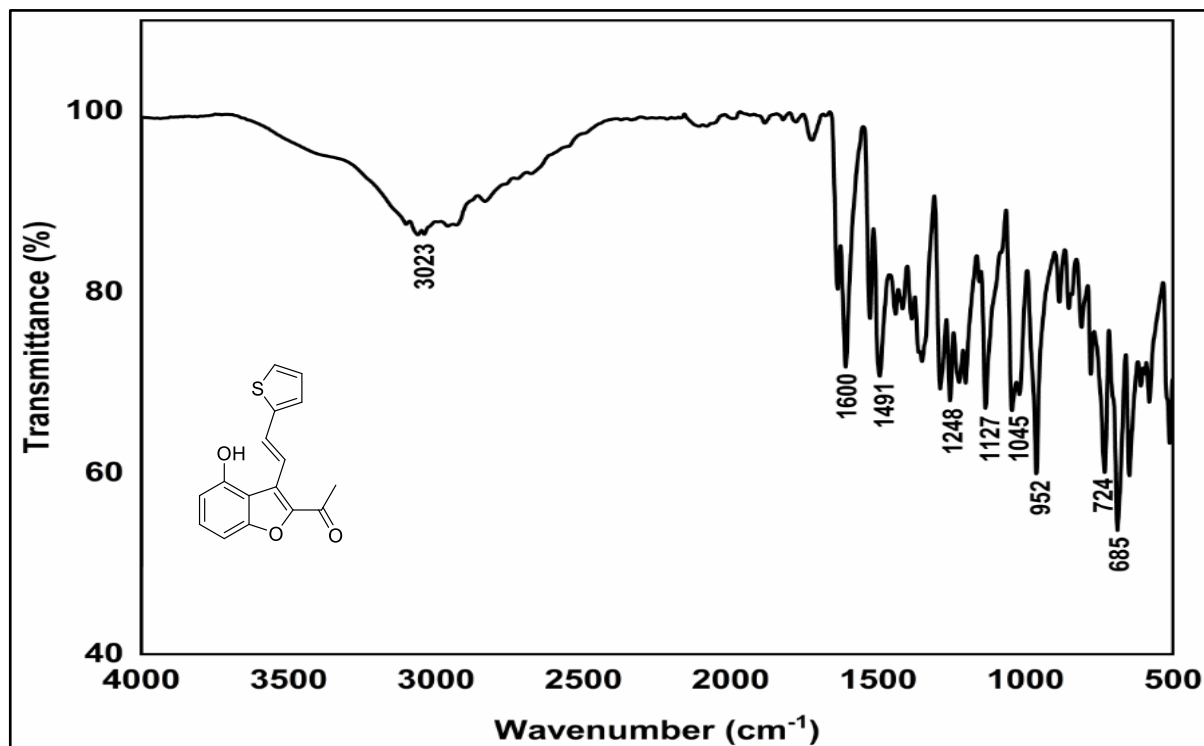

Figure 99: FT-IR spectrum of compound 6f

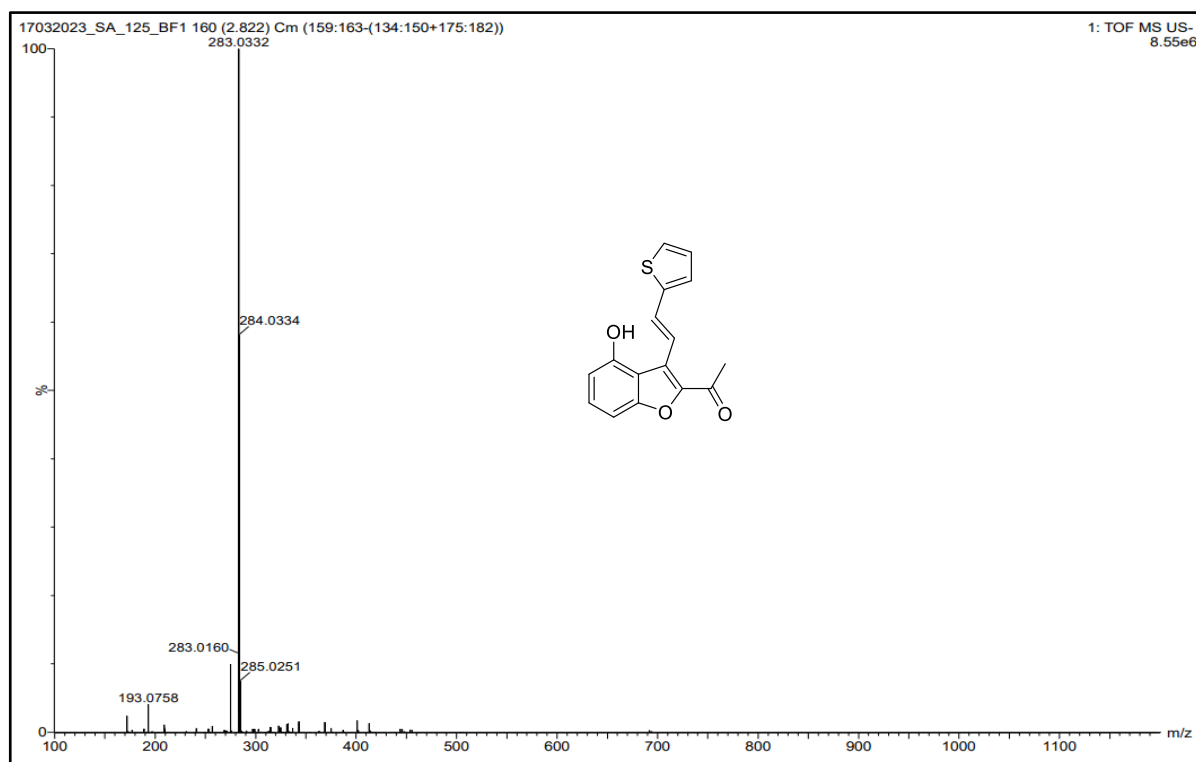

Figure 100: HRMS spectrum of compound 6g

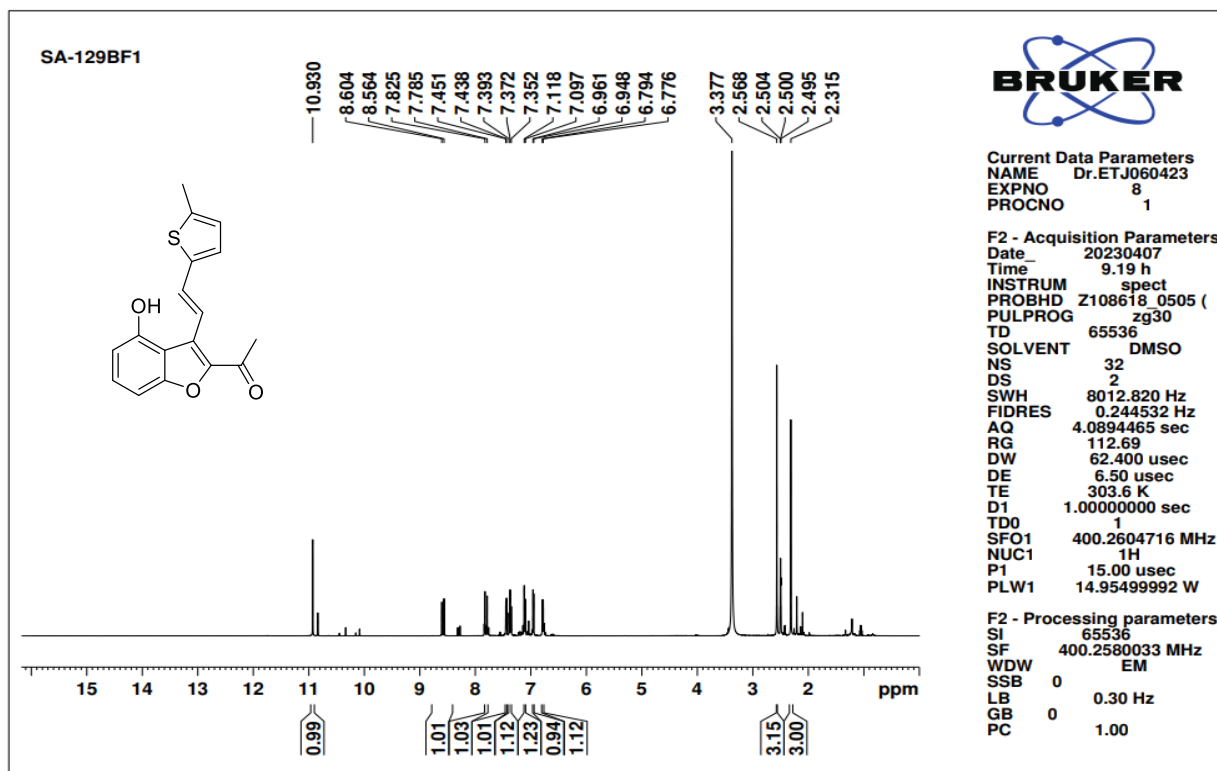Figure 101:  $^1\text{H}$  NMR spectrum of compound 6h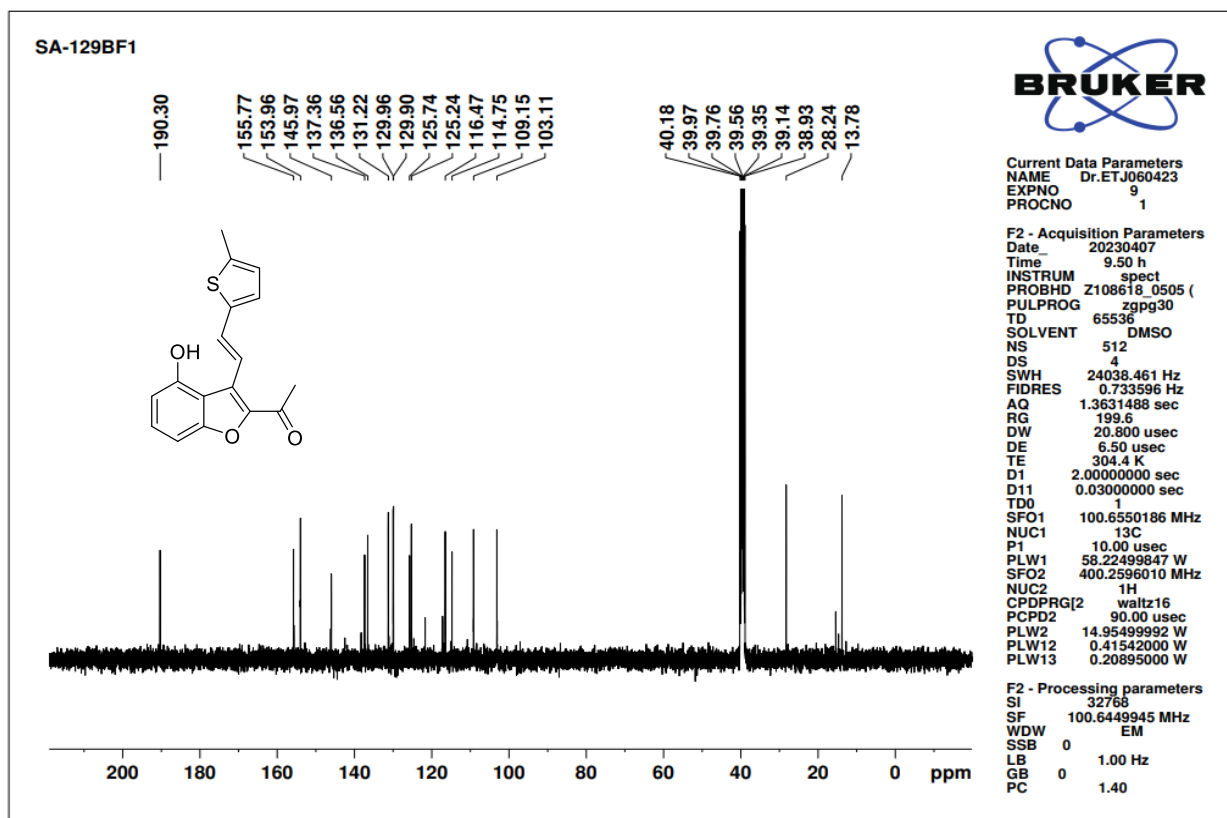Figure 102:  $^{13}\text{C}$  NMR spectrum of compound 6h

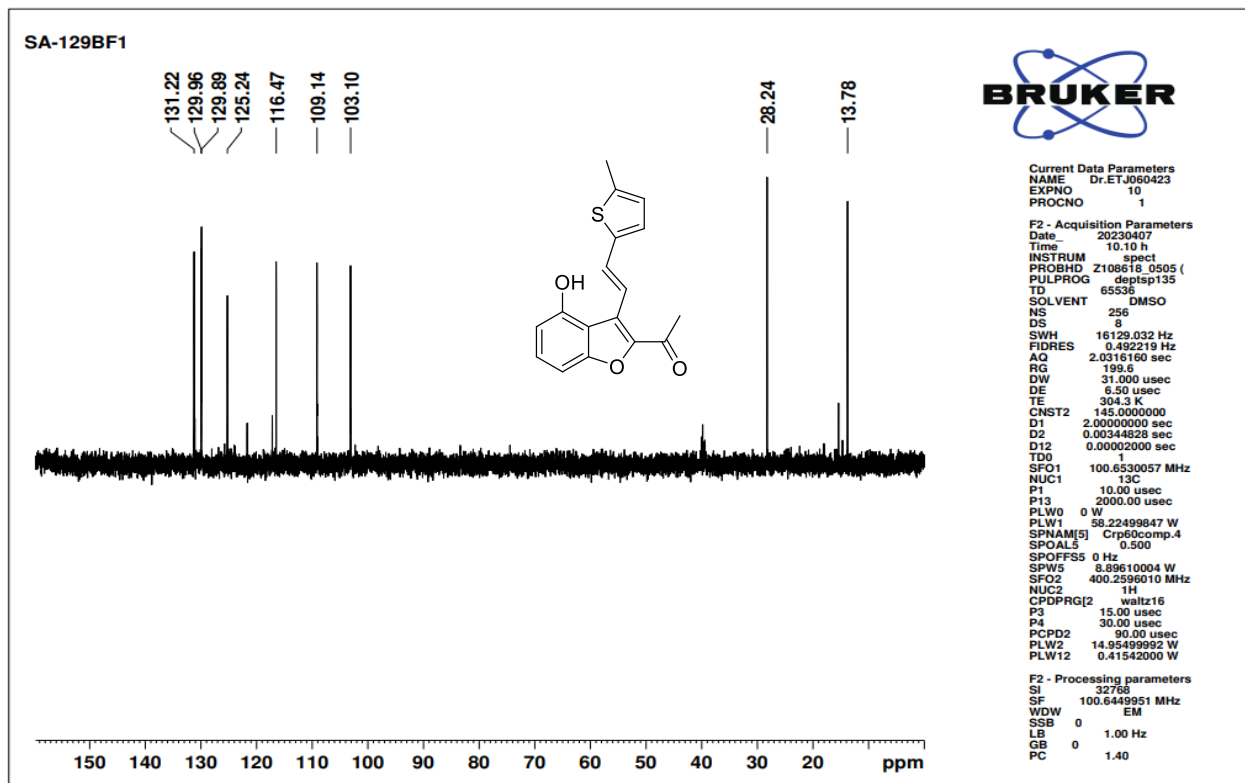

Figure 103: DEPT-135 NMR spectrum of compound 6h

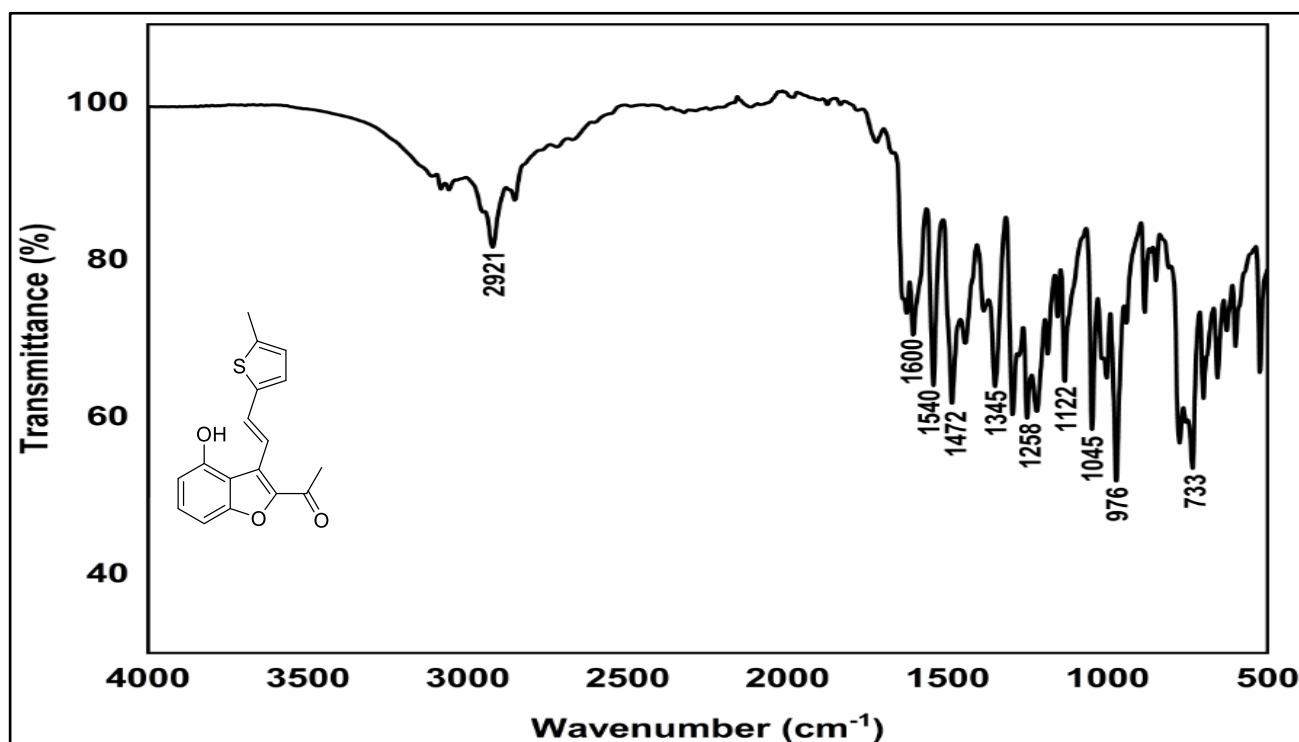

Figure 104: FT-IR spectrum of compound 6h

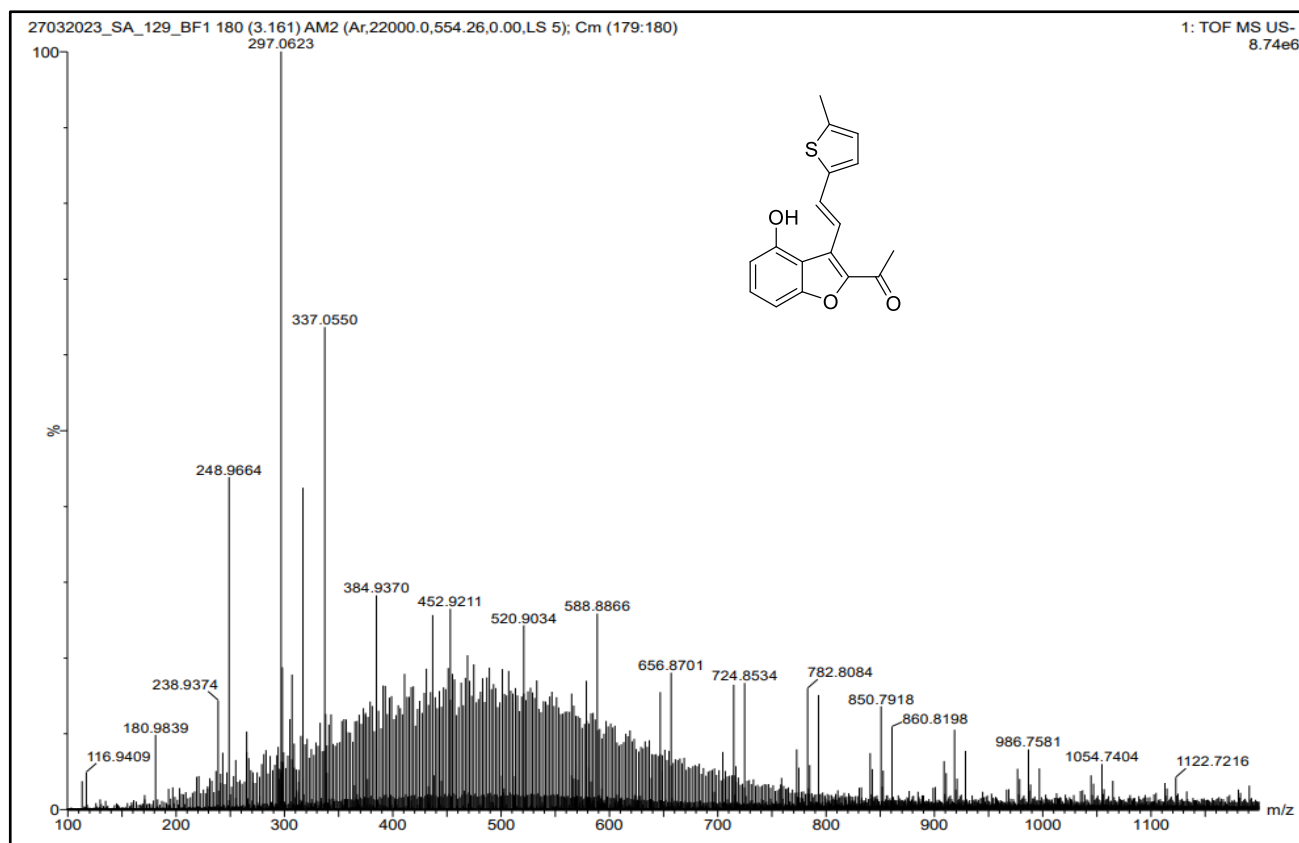

Figure 105: HRMS spectrum of compound 6h

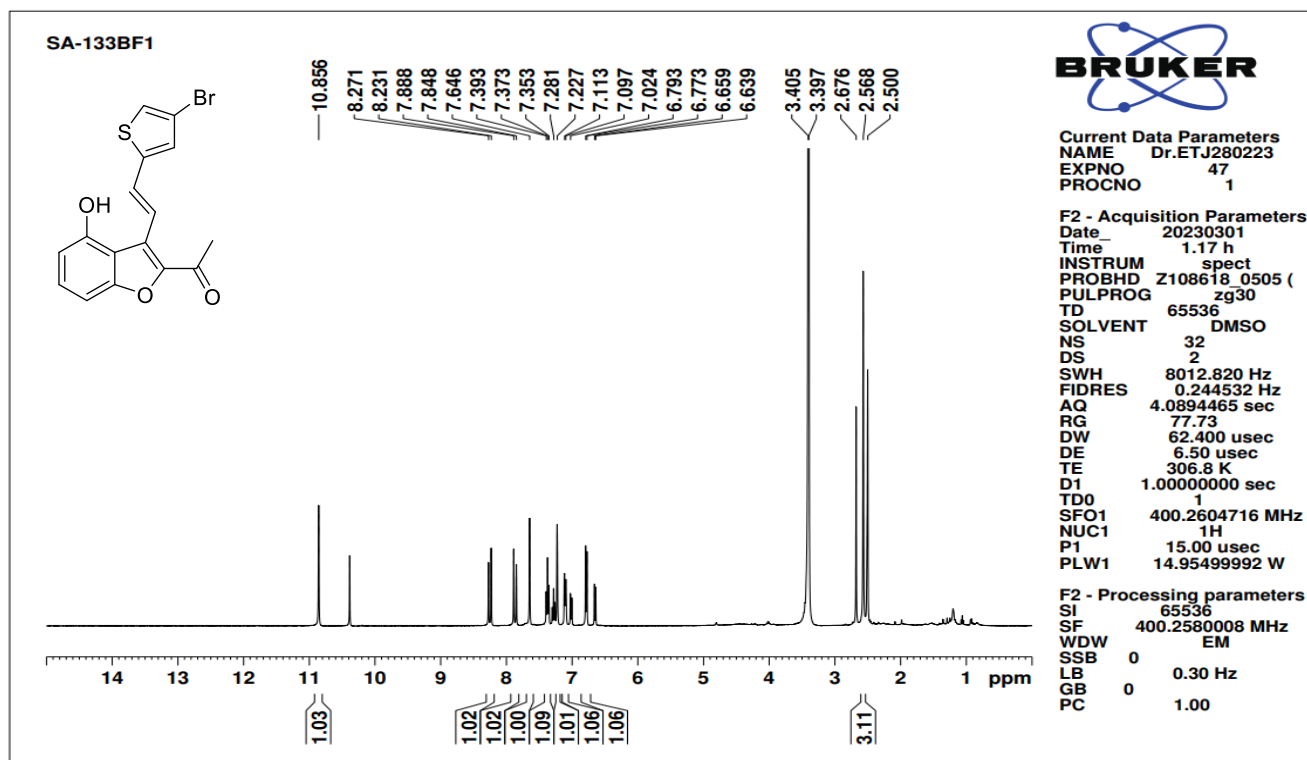Figure 106: <sup>1</sup>H NMR spectrum of compound 6i

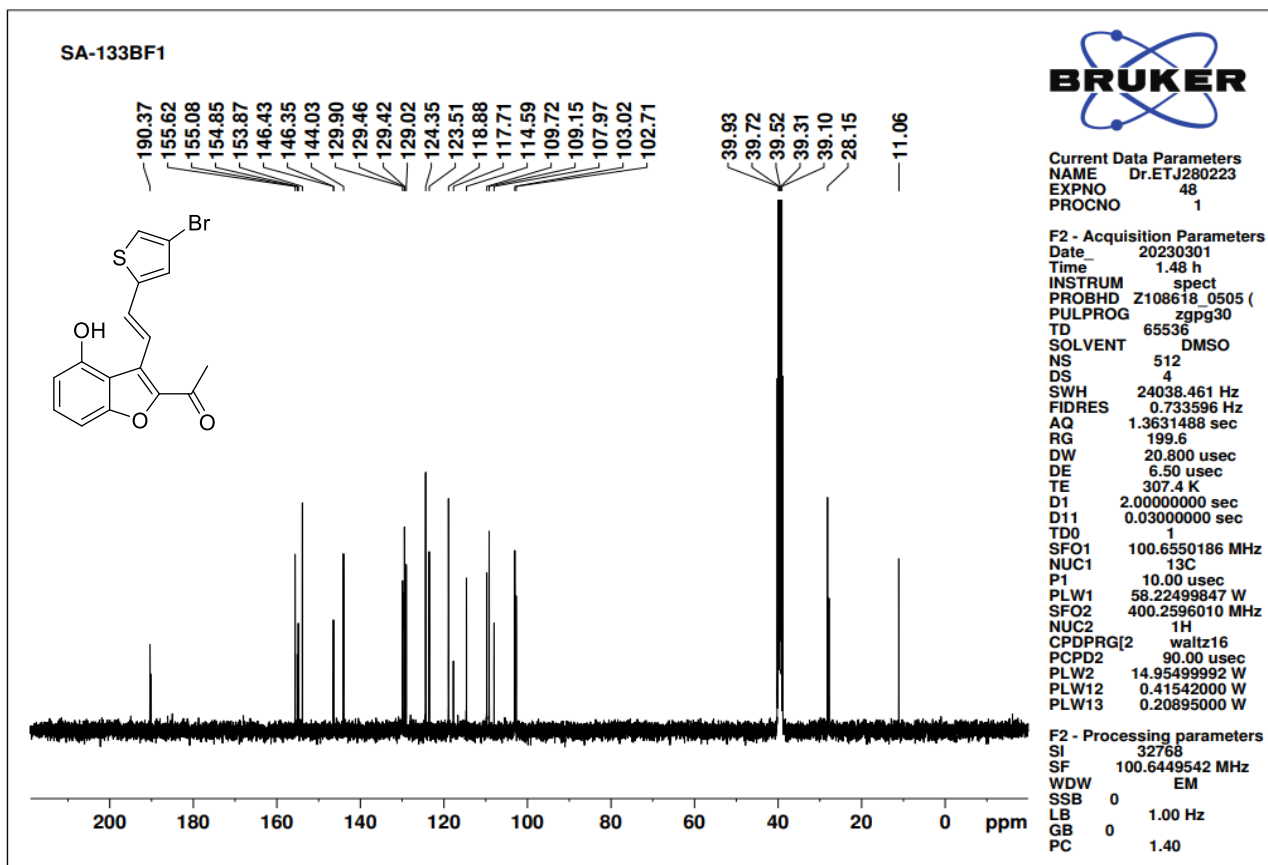Figure 107:  $^{13}\text{C}$  NMR spectrum of compound **6i**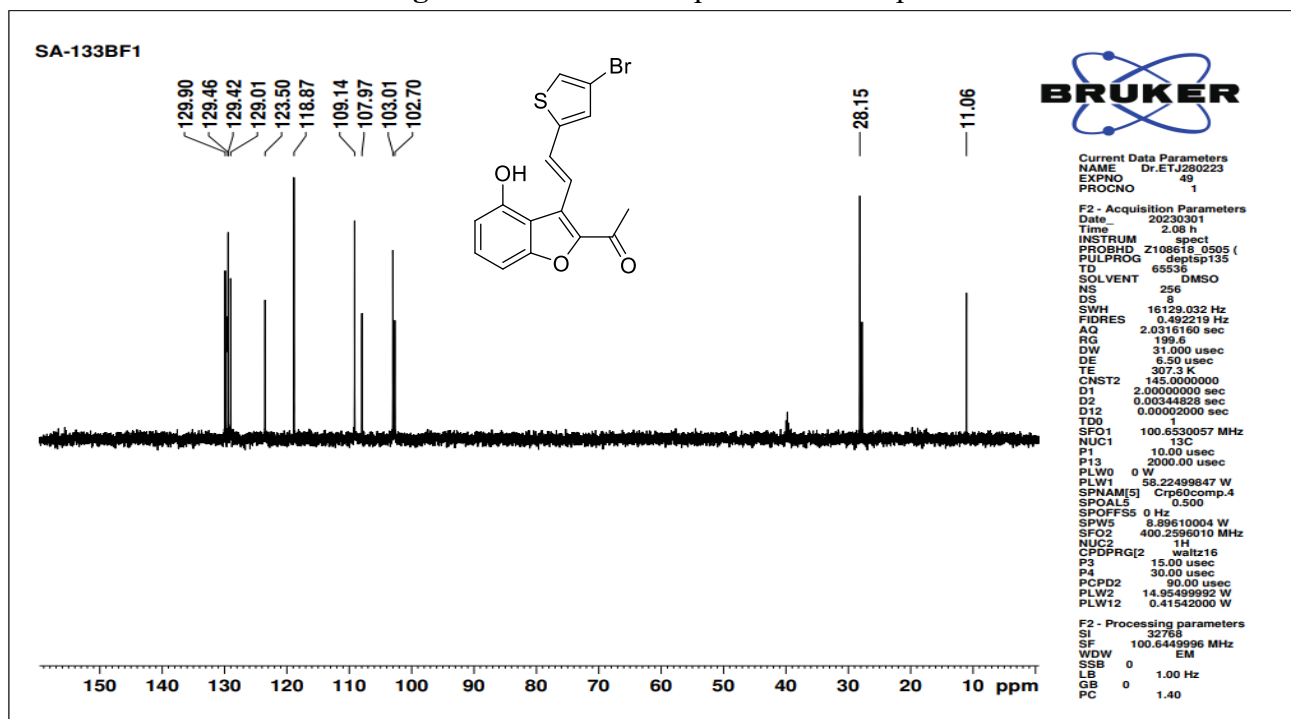Figure 108: DEPT-135 NMR spectrum of compound **6i**

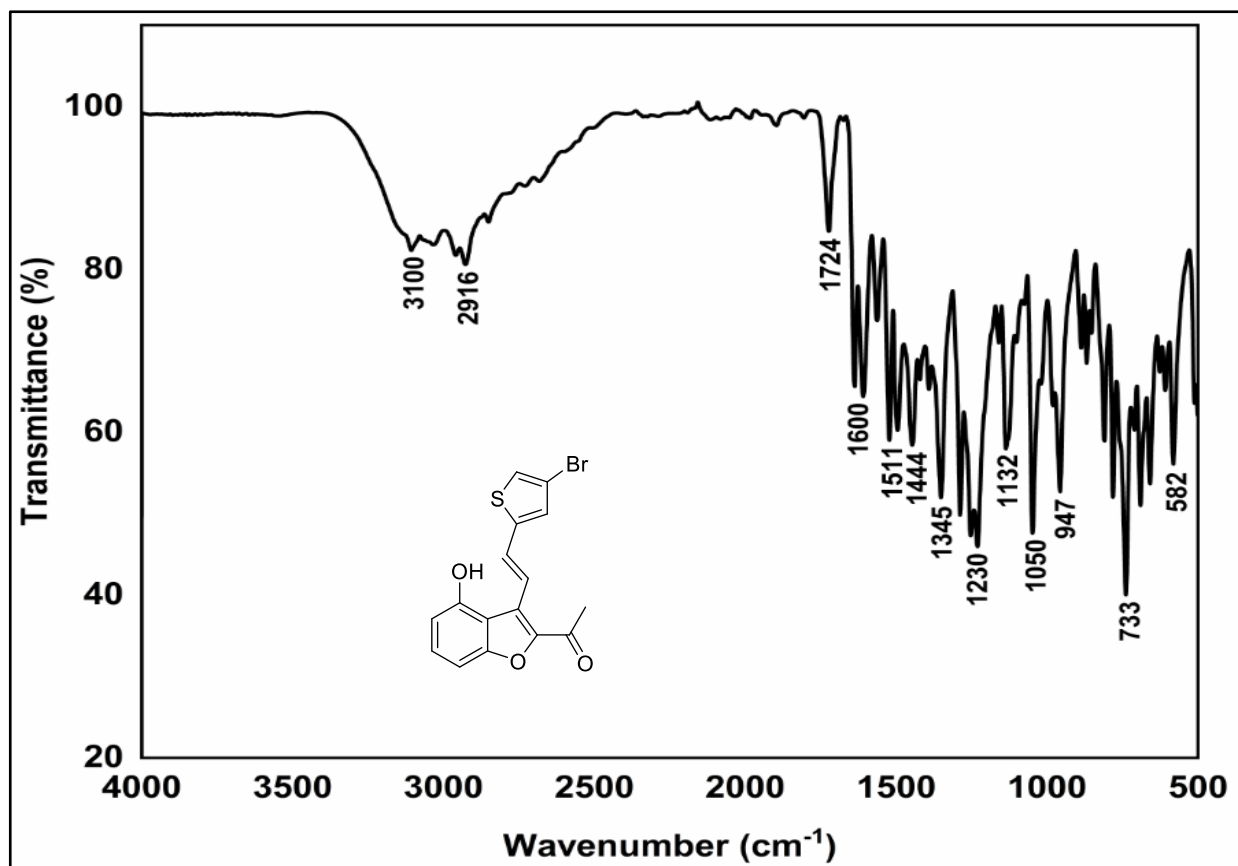

Figure 108: FT-IR spectrum of compound 6i

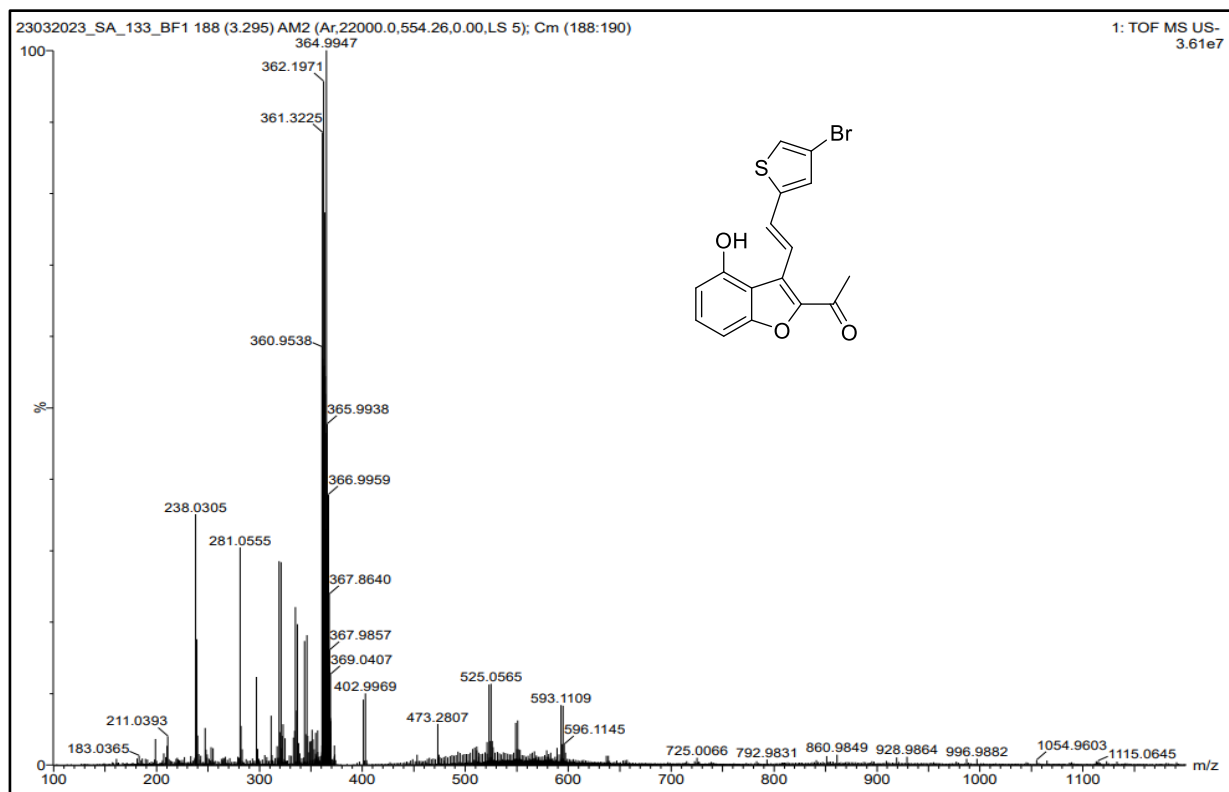

Figure 109: HRMS spectrum of compound 6i



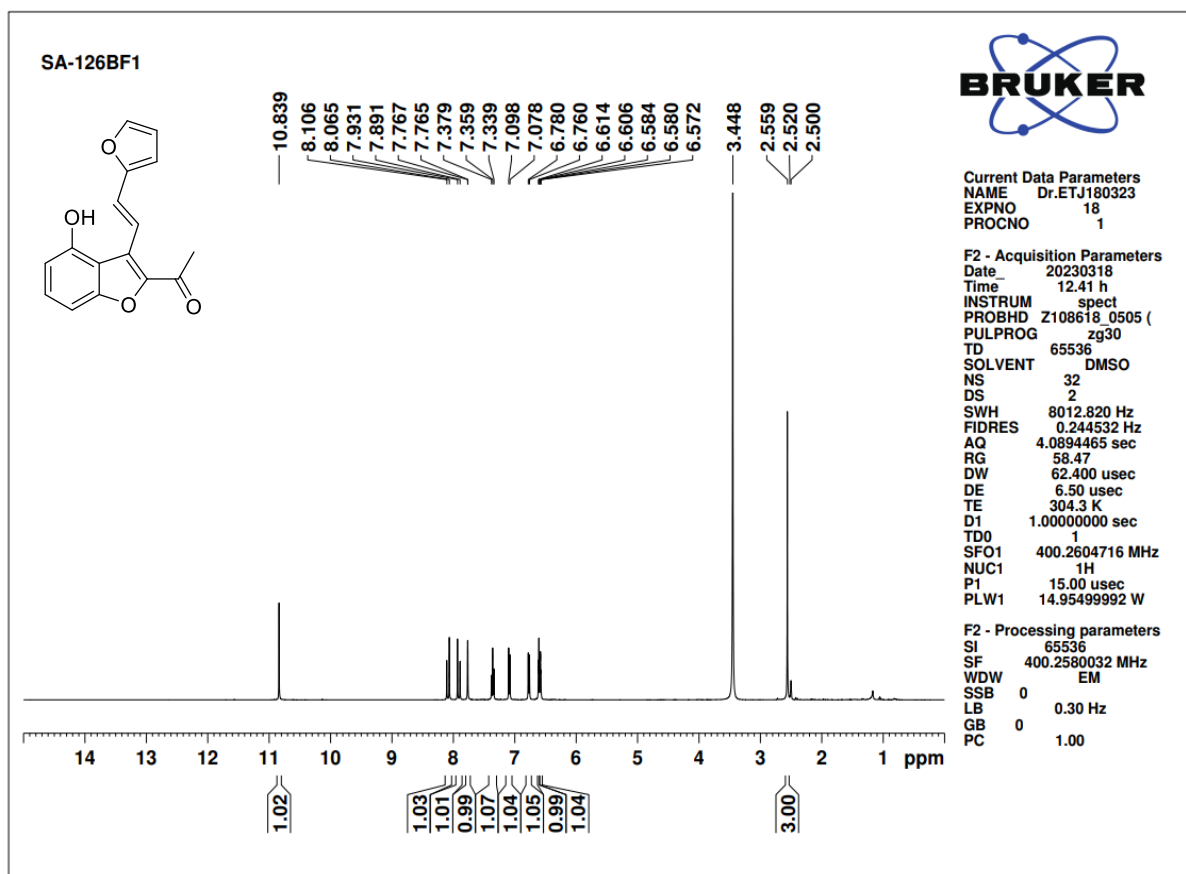Figure 110:  $^1\text{H}$  NMR spectrum of compound 6j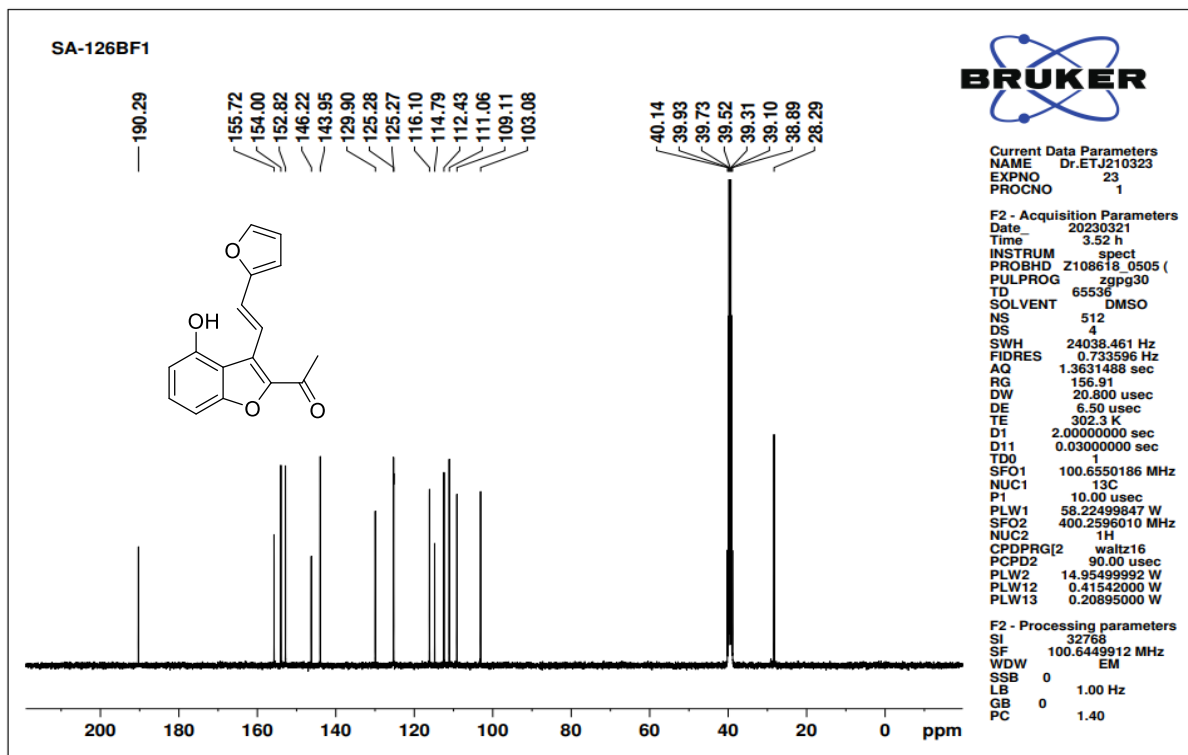Figure 111:  $^{13}\text{C}$  NMR spectrum of compound 6j

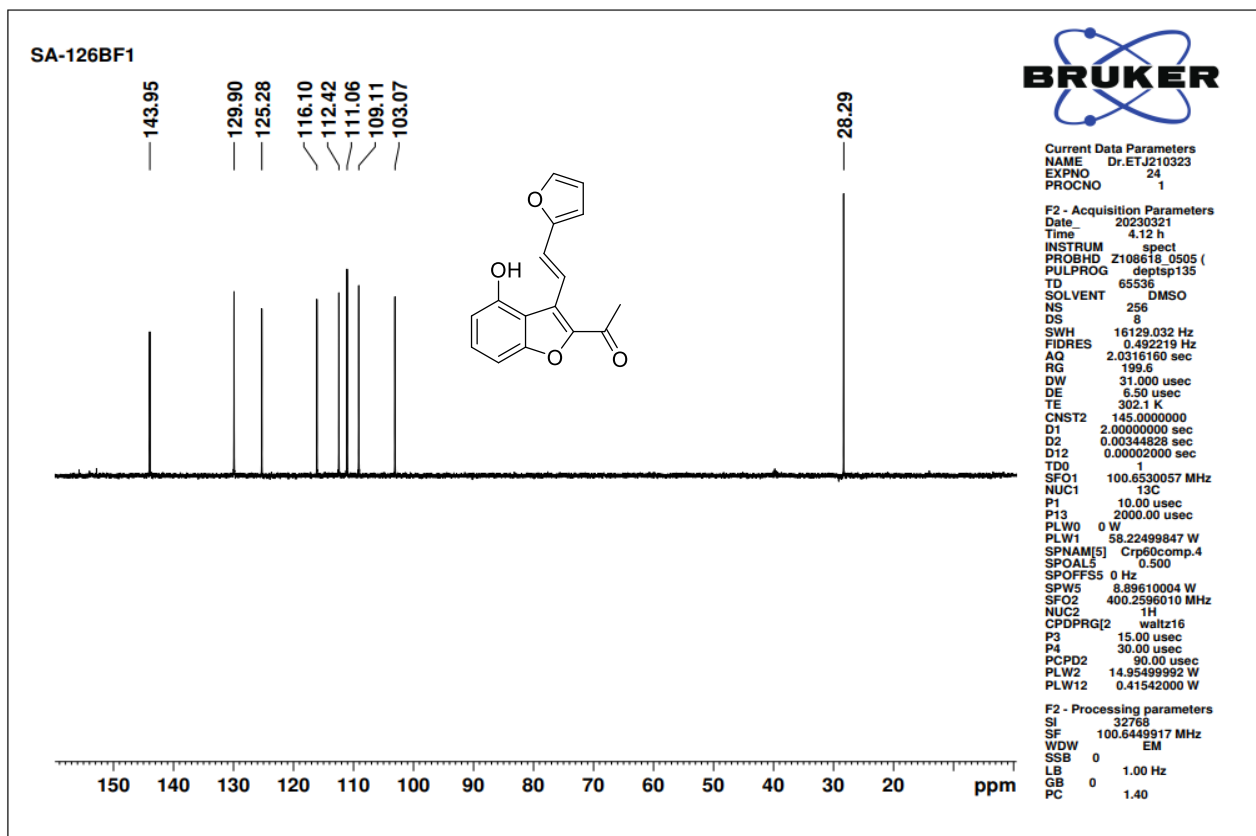

Figure 112: DEPT-135 NMR spectrum of compound 6j

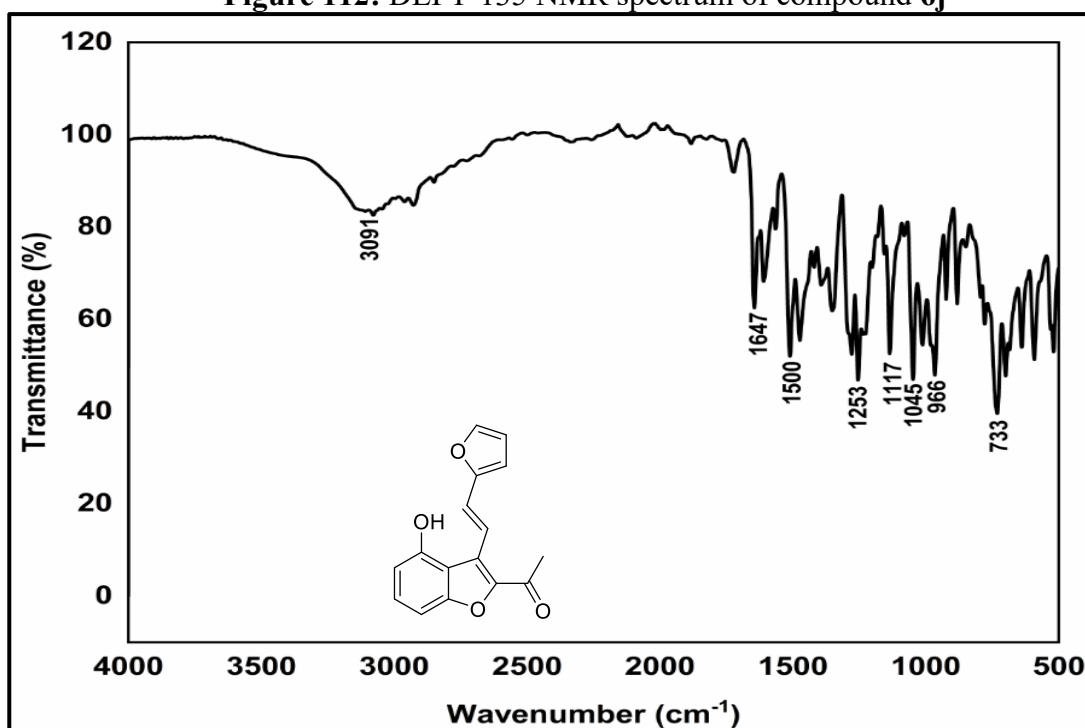

Figure 113: FT-IR spectrum of compound 6j

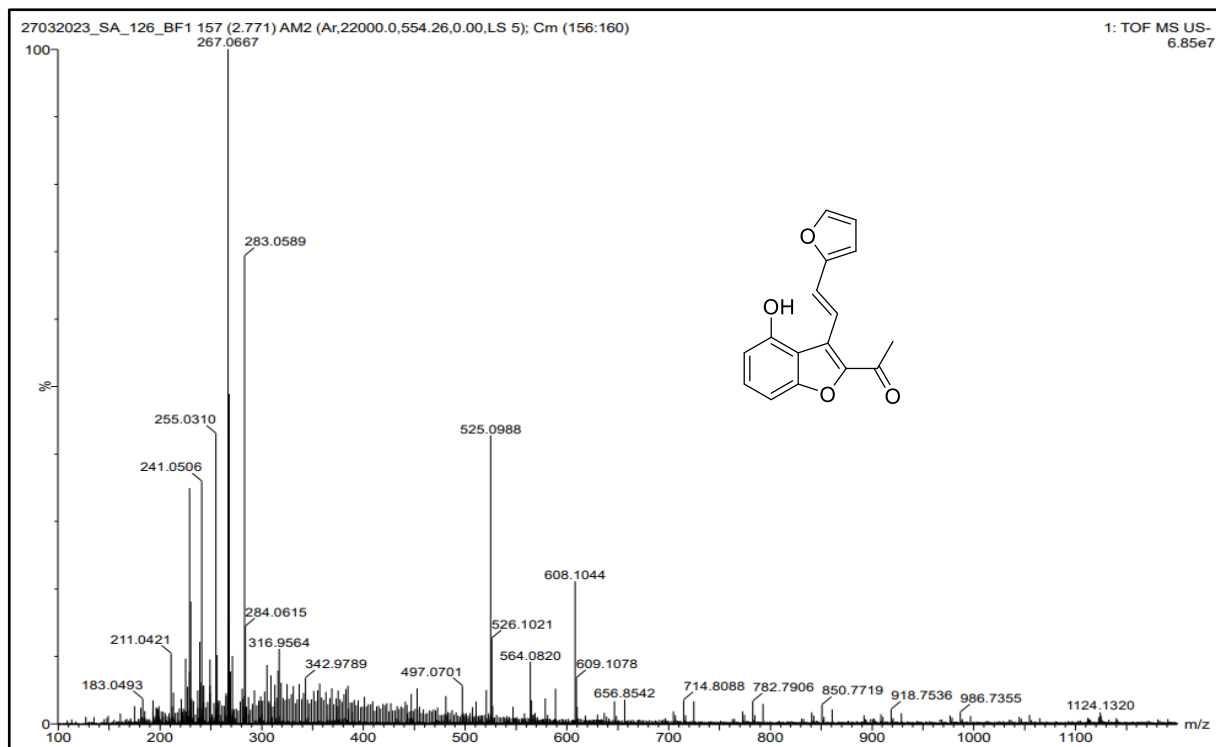

Figure 114: HRMS spectrum of compound 6j

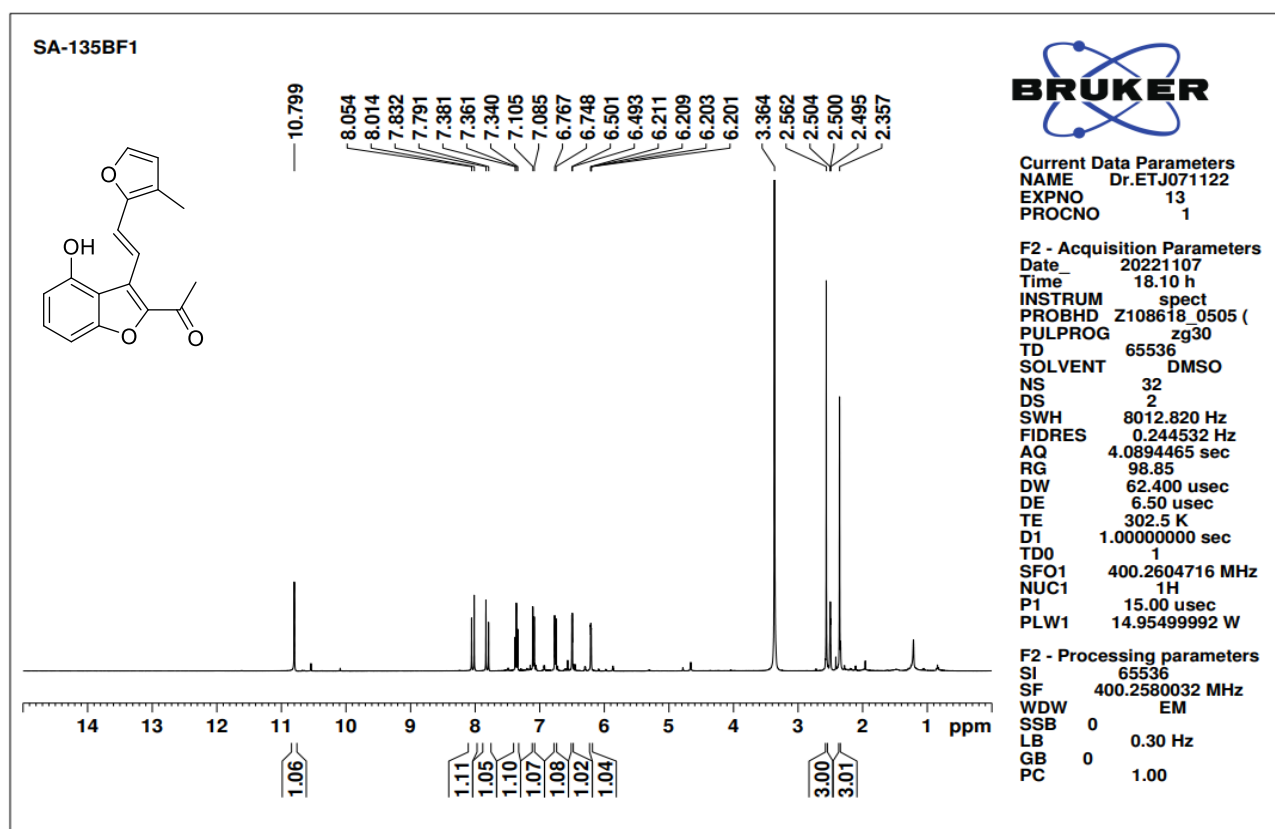Figure 115: <sup>1</sup>H NMR spectrum of compound 6k

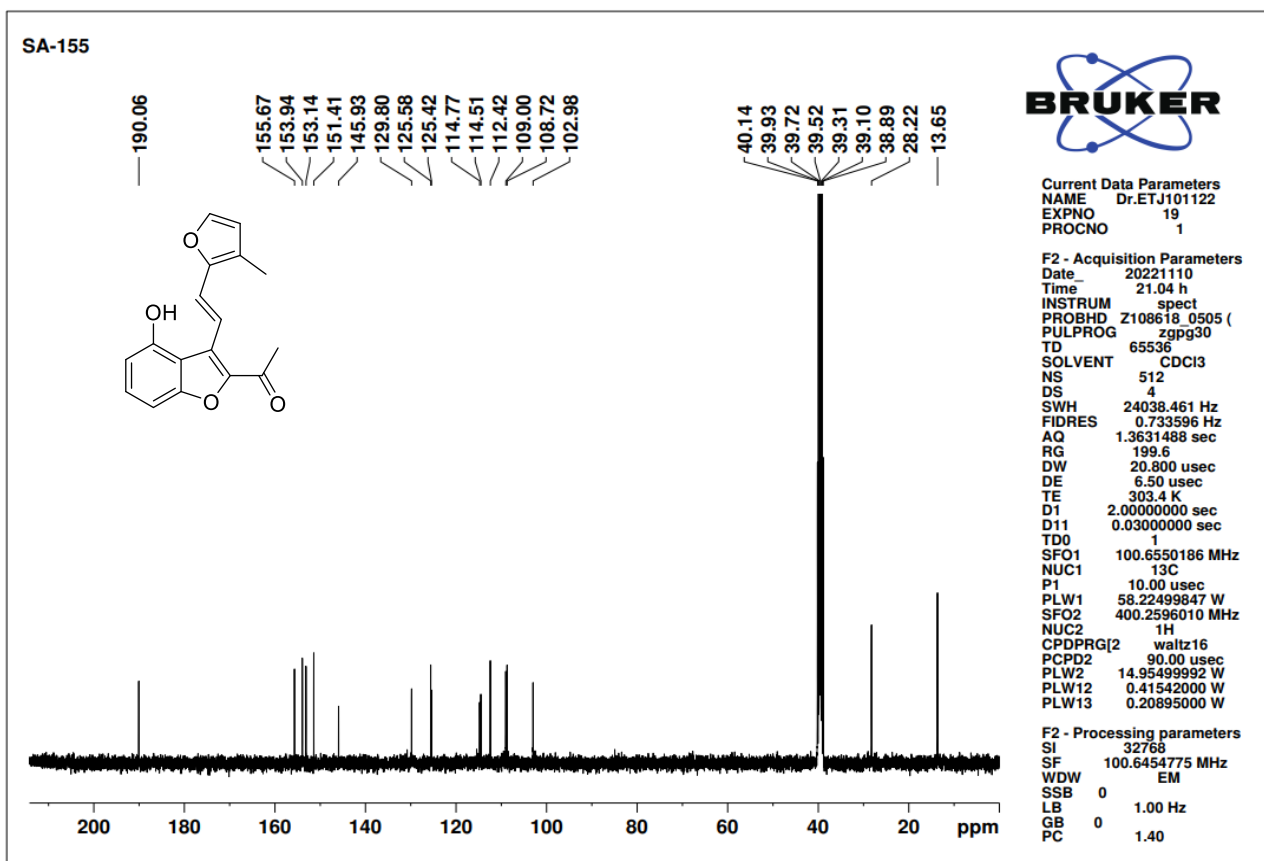Figure 116:  $^{13}\text{C}$  NMR spectrum of compound 6k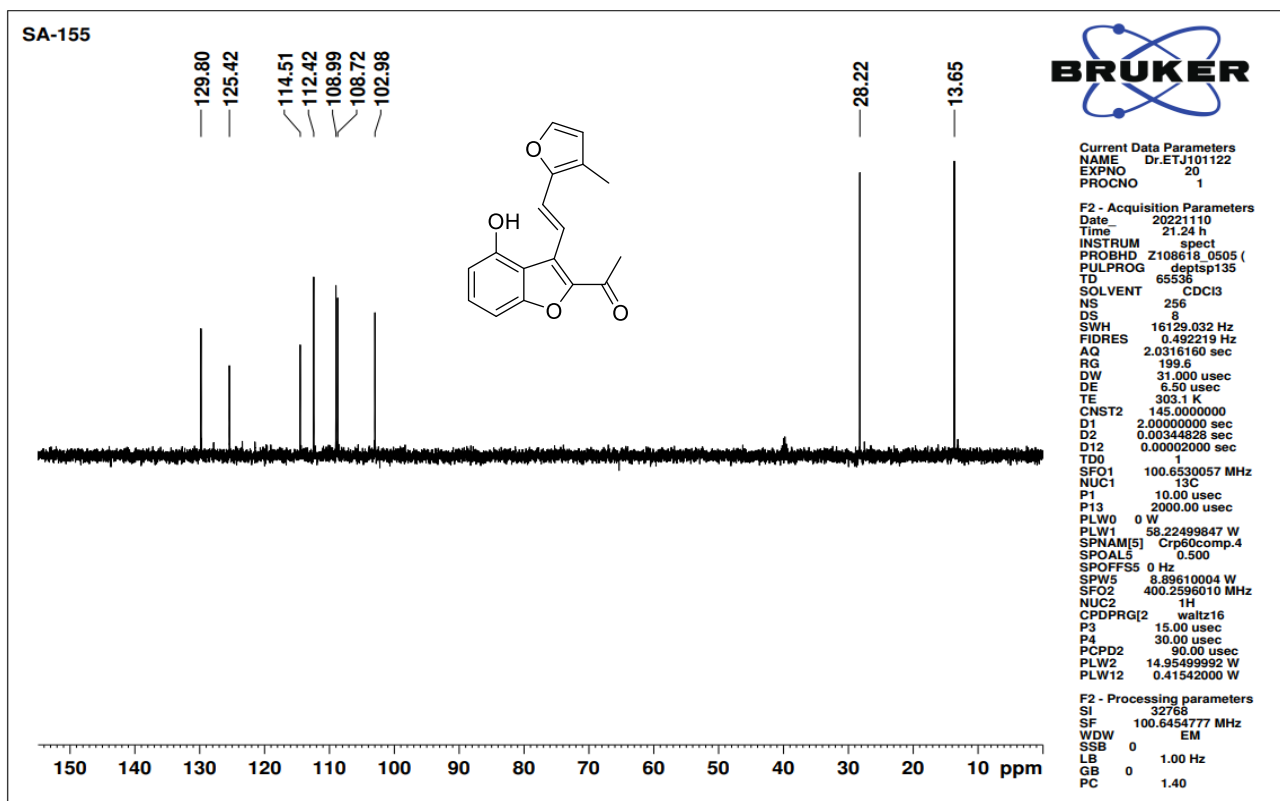

Figure 117: DEPT-135 NMR spectrum of compound 6k

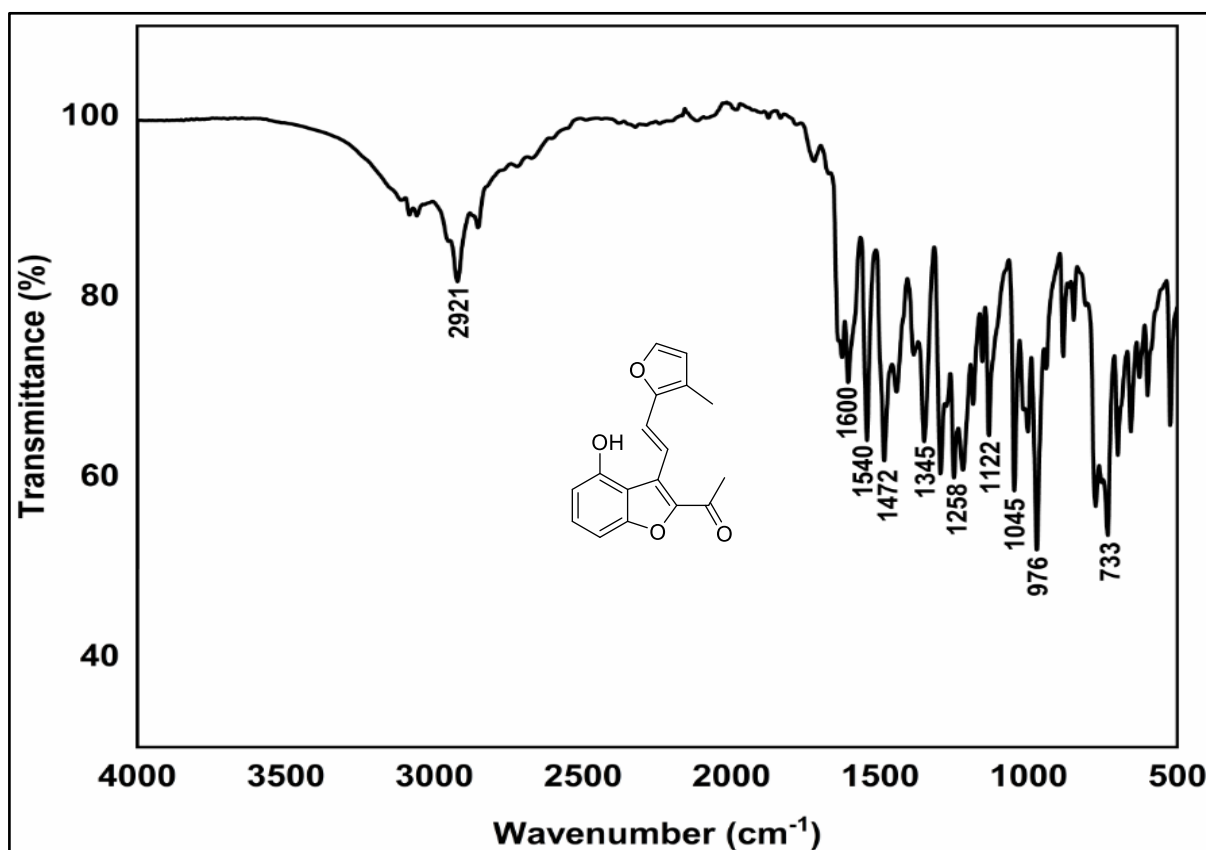

Figure 118: FT-IR spectrum of compound 6k

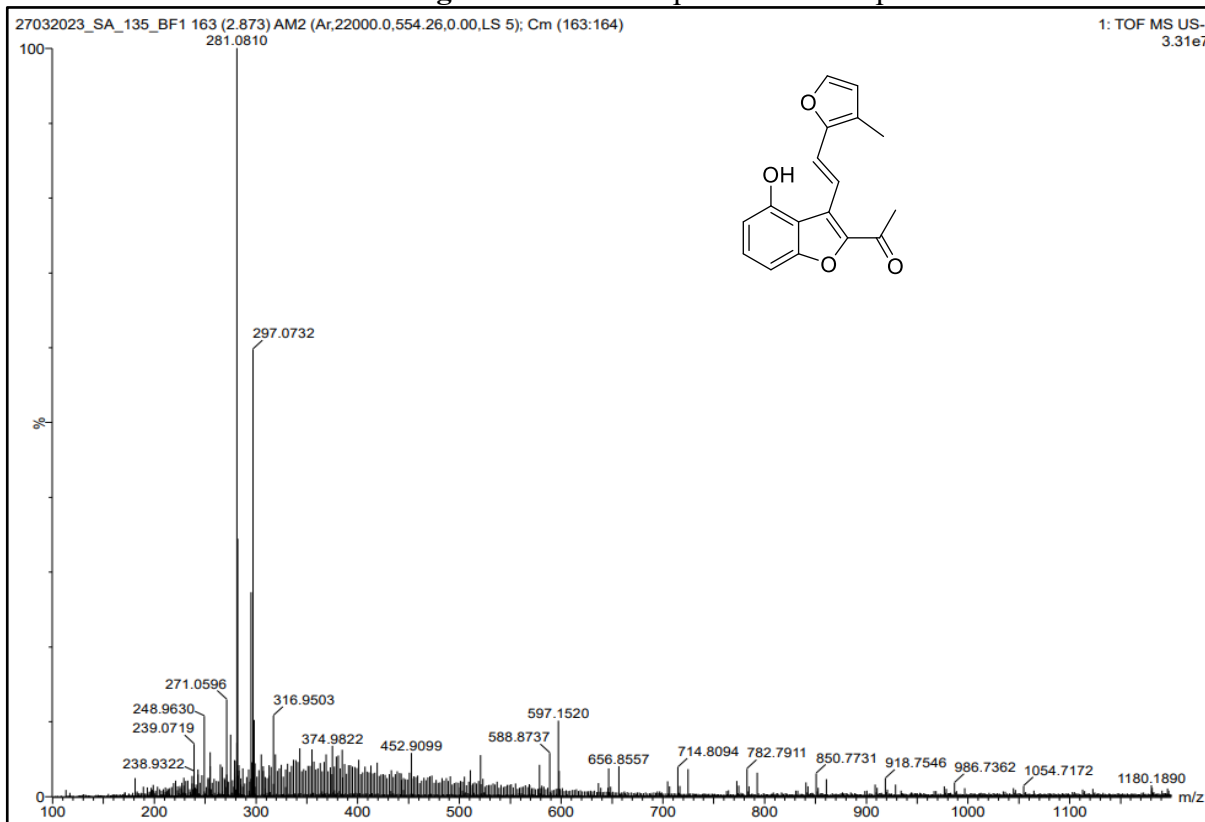

Figure 119: HRMS spectrum of compound 6k

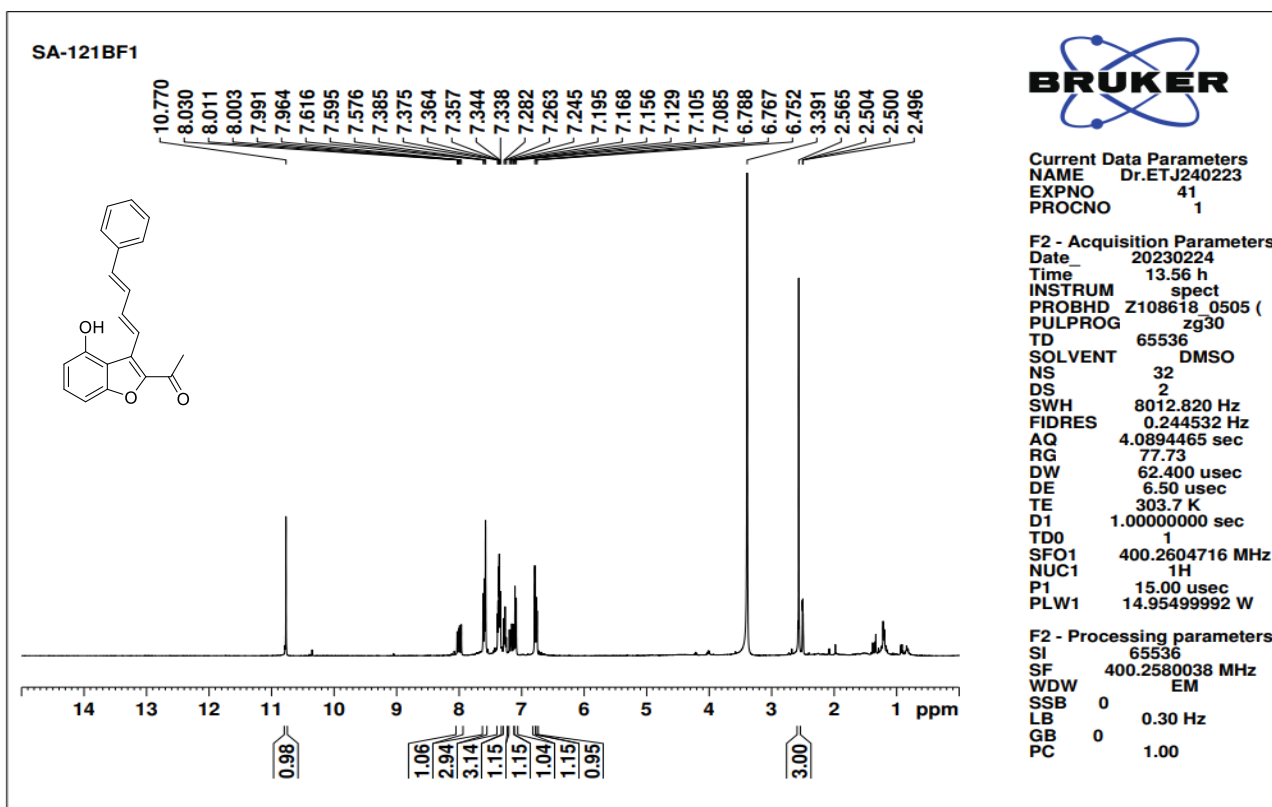Figure 120:  $^1\text{H}$  NMR spectrum of compound 6l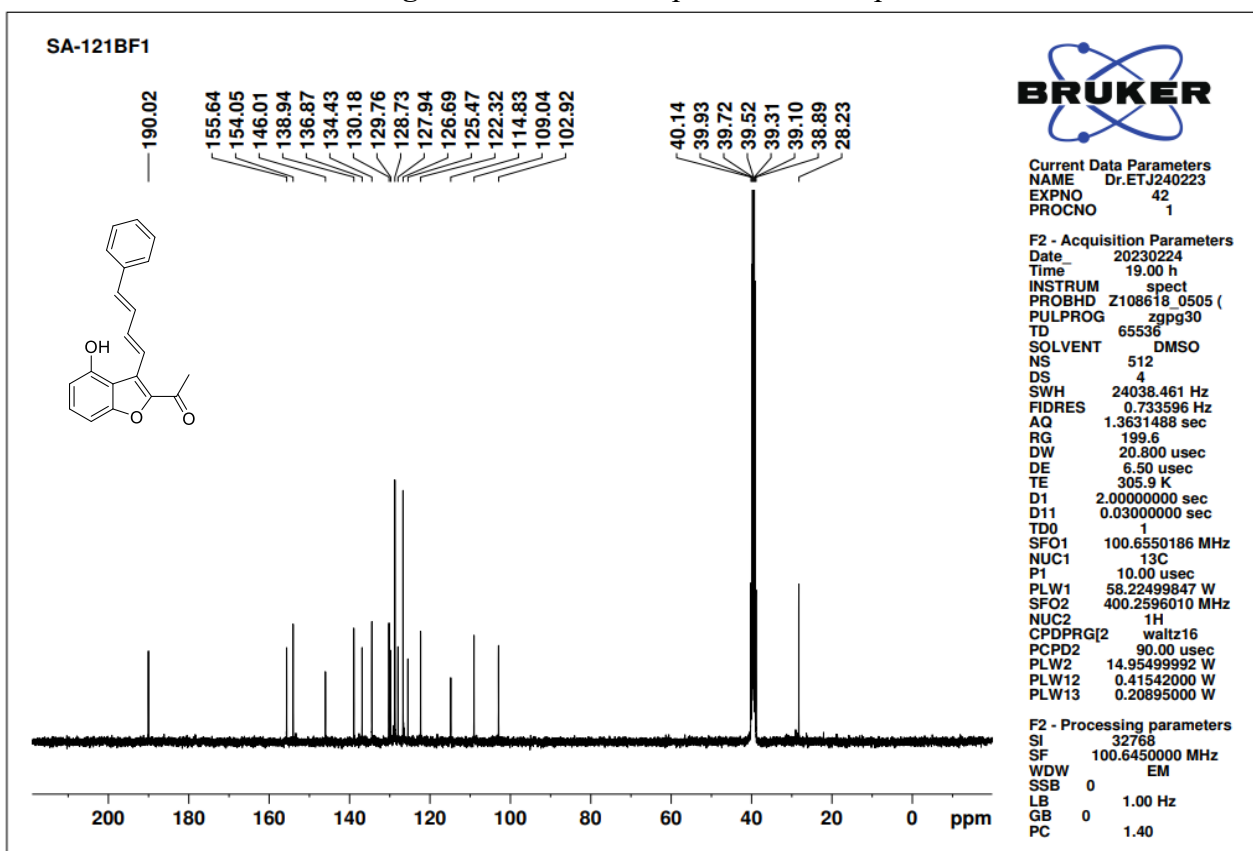Figure 121:  $^{13}\text{C}$  NMR spectrum of compound 6l

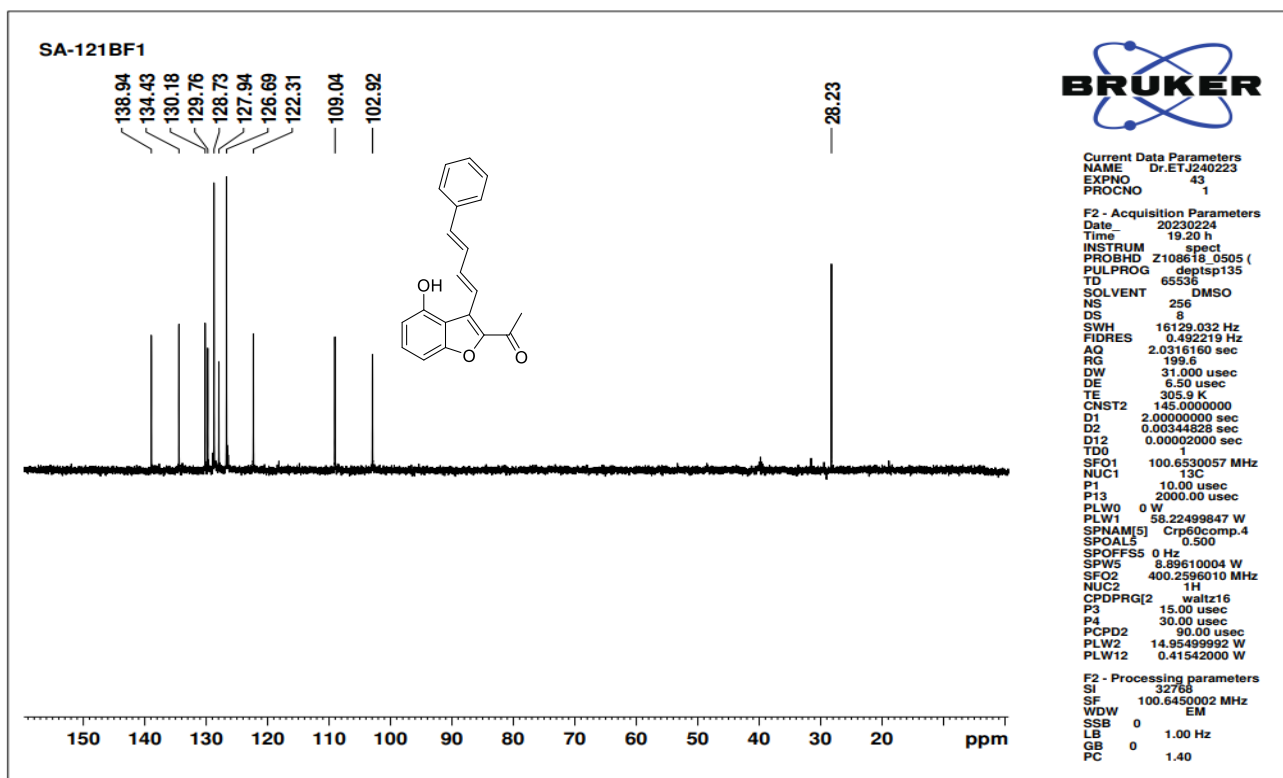

Figure 122: DEPT-135 NMR spectrum of compound 6l

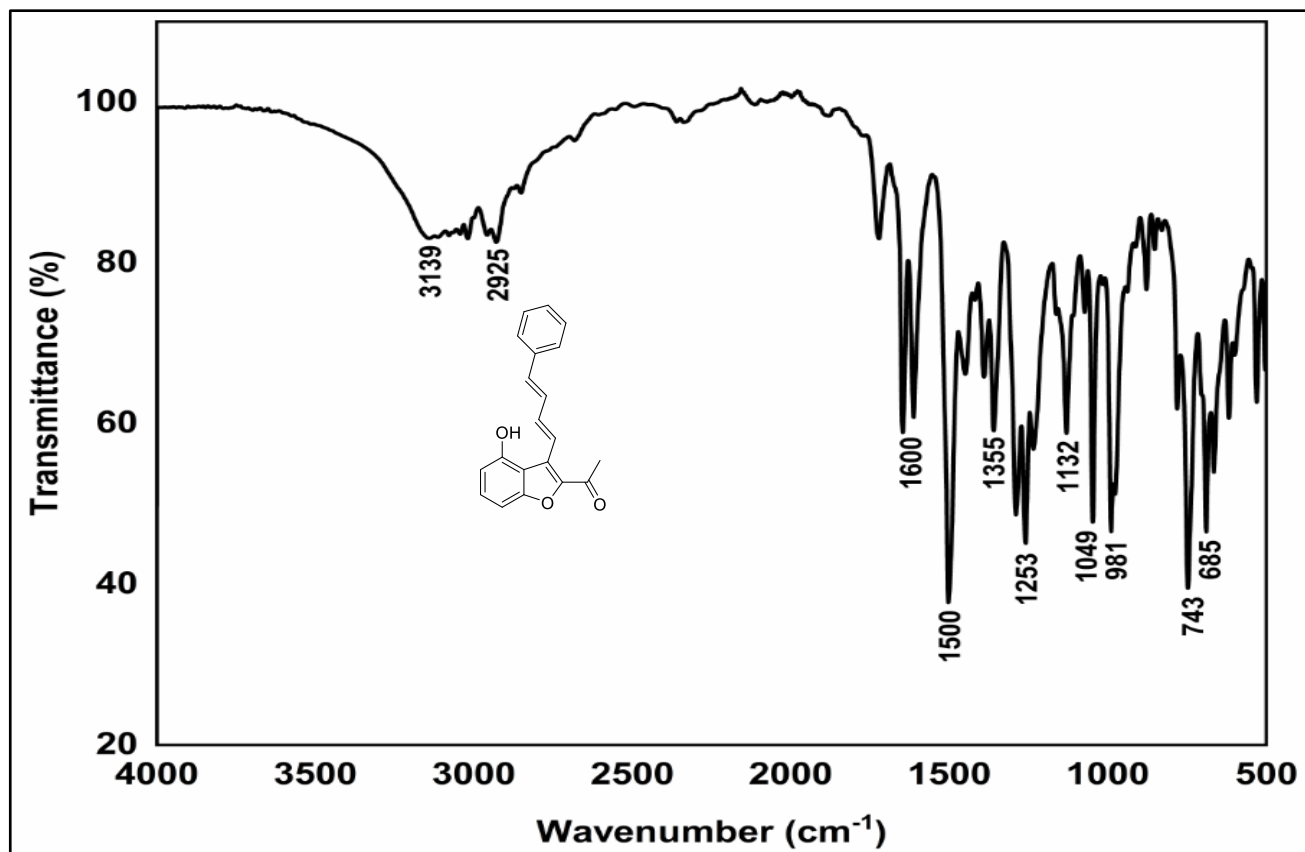

Figure 123: FT-IR spectrum of compound 6l

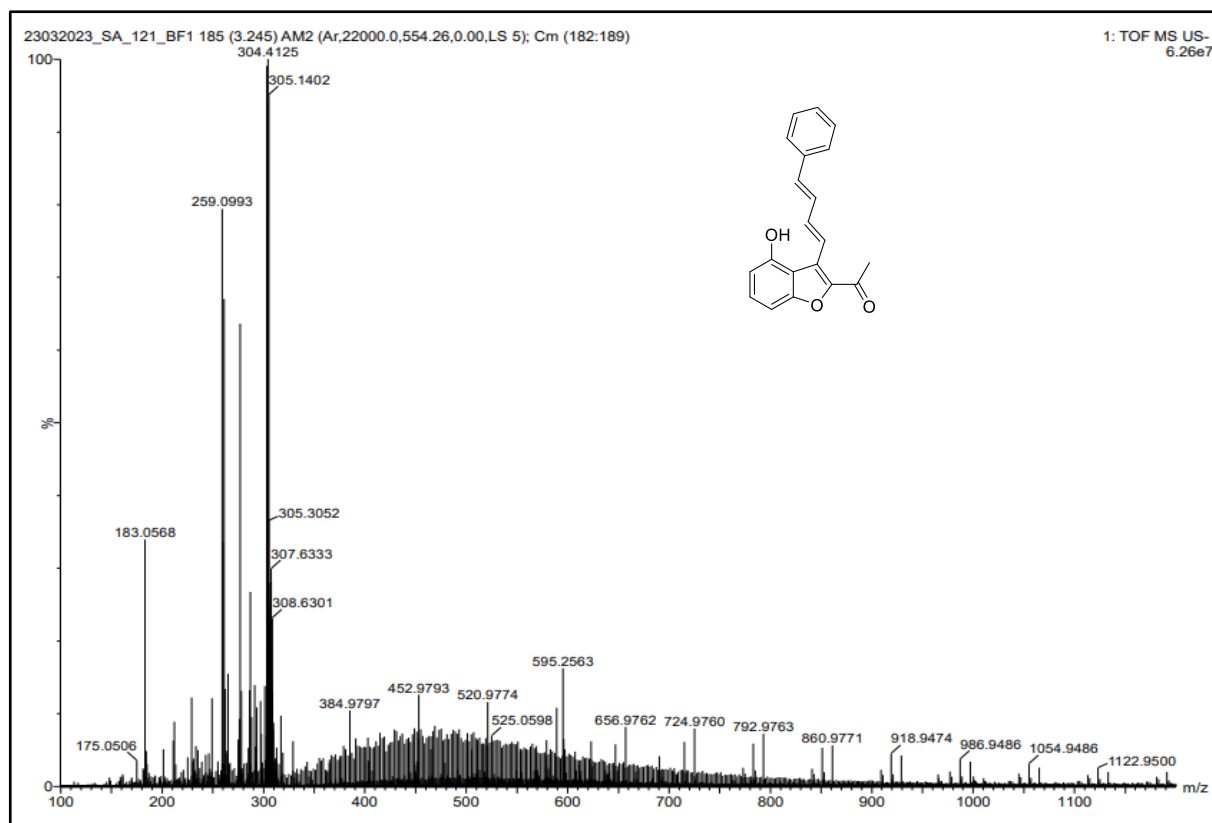

Figure 124: HRMS spectrum of compound 6l

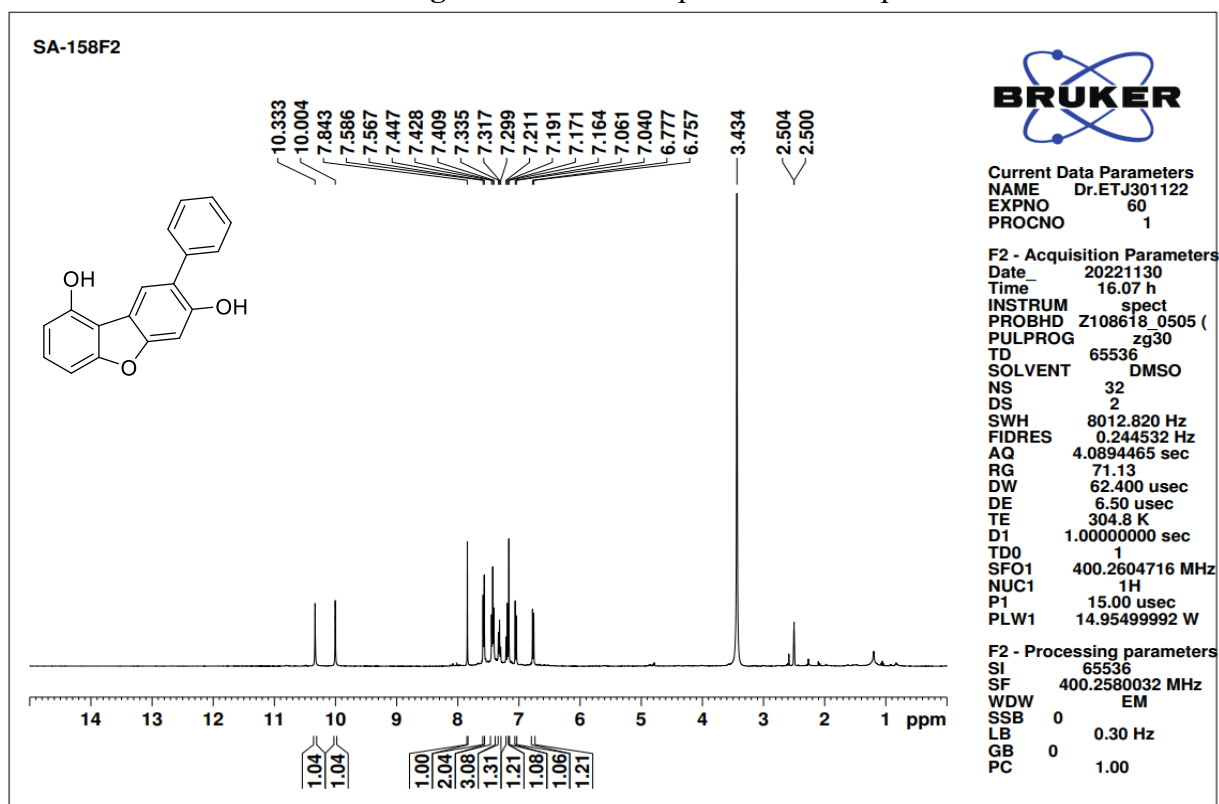Figure 125: <sup>1</sup>H NMR spectrum of compound 7a



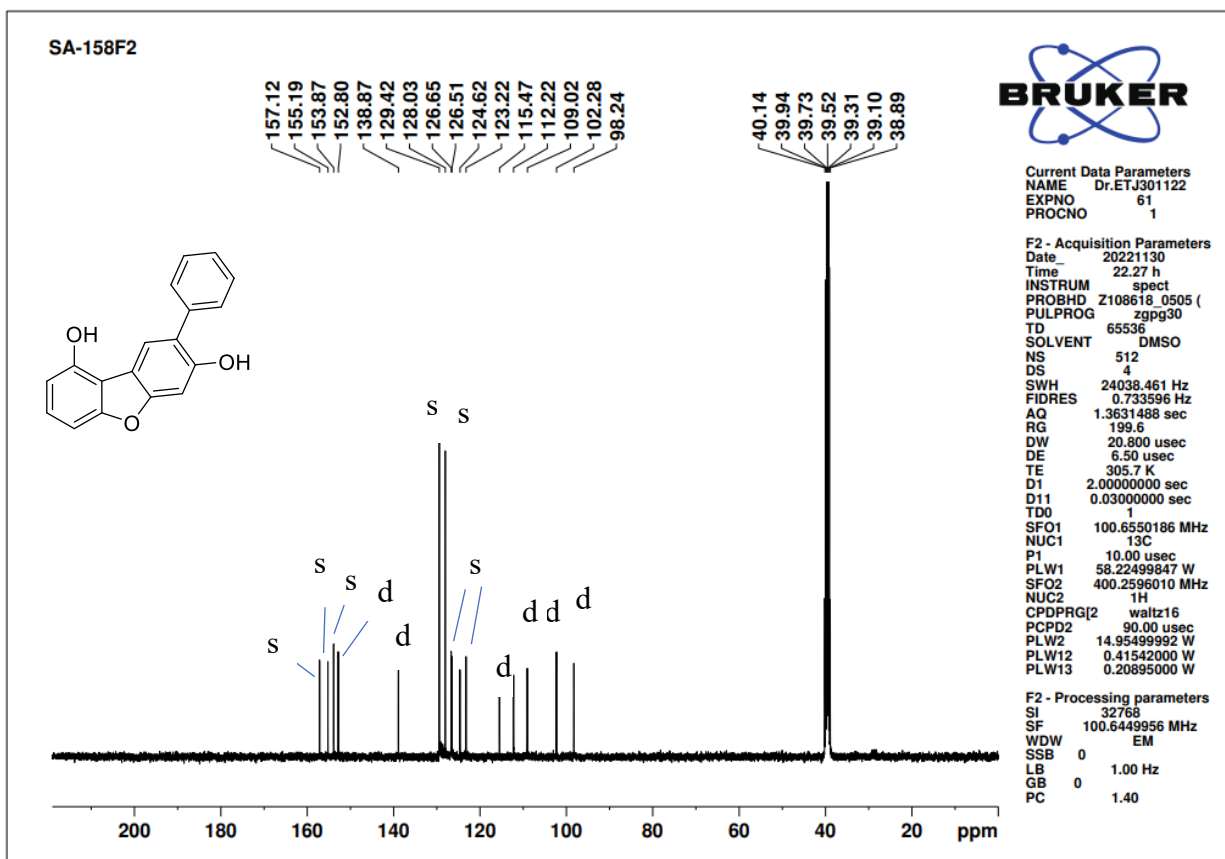Figure 126:  $^{13}\text{C}$  NMR spectrum of compound 7a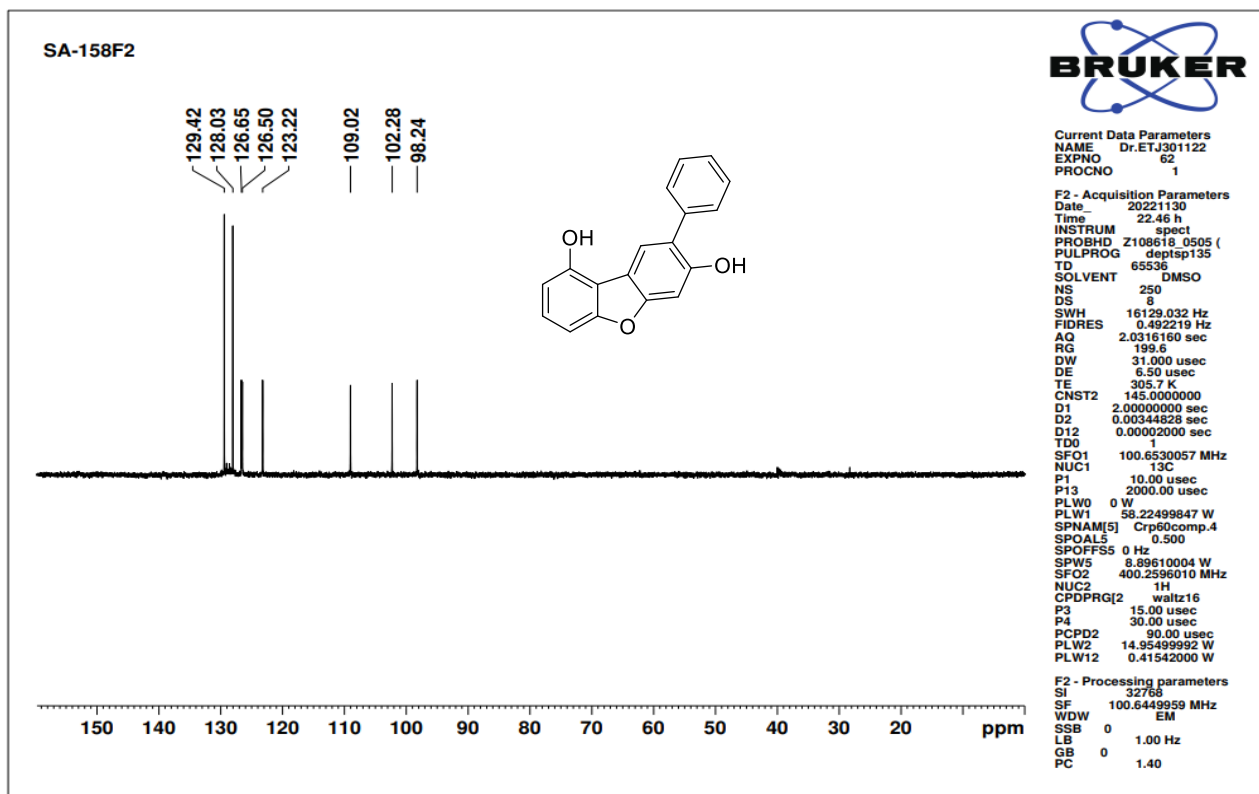

Figure 127: DEPT-135 NMR spectrum of compound 7a

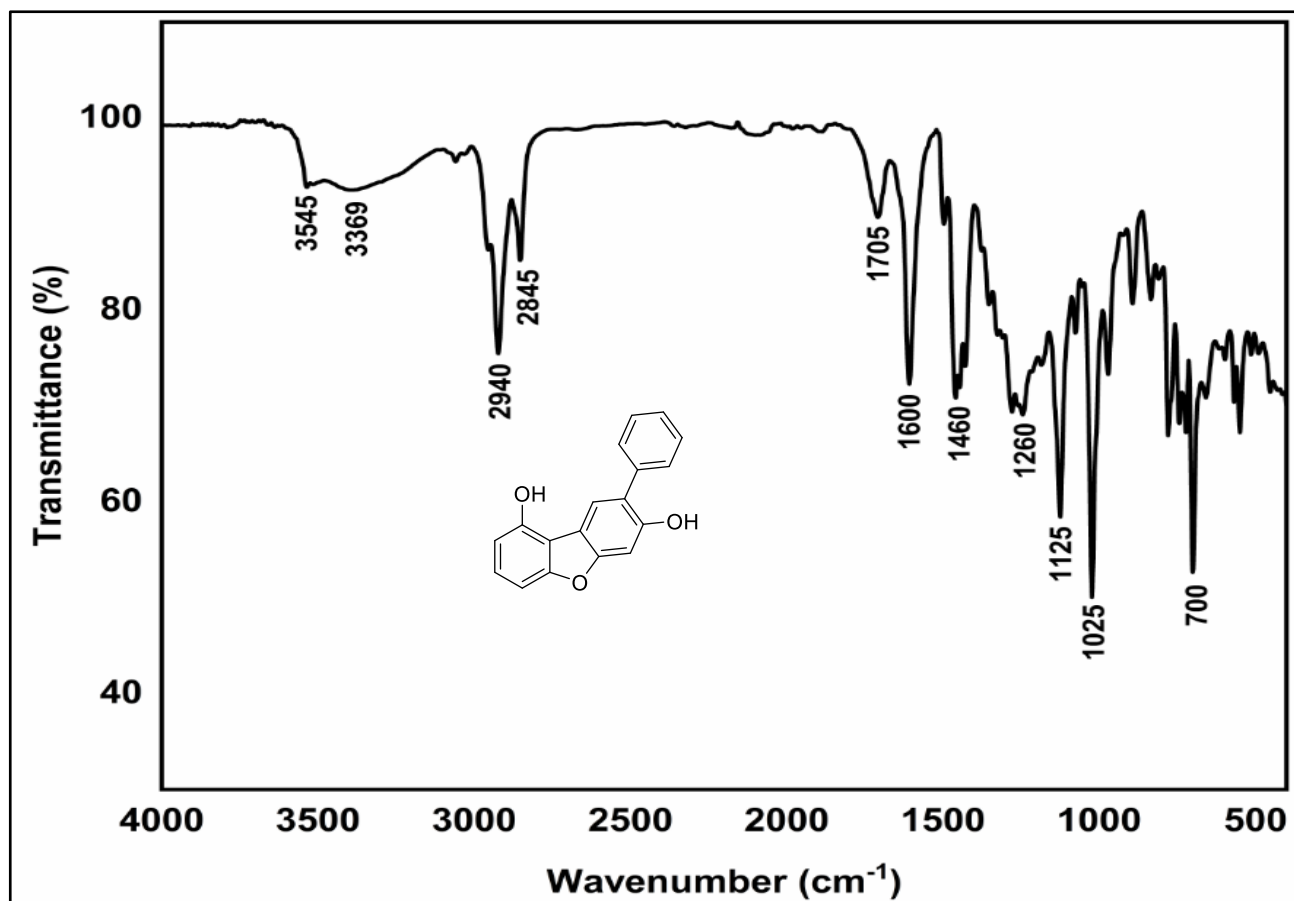

Figure 128: FT-IR spectrum of compound 7a

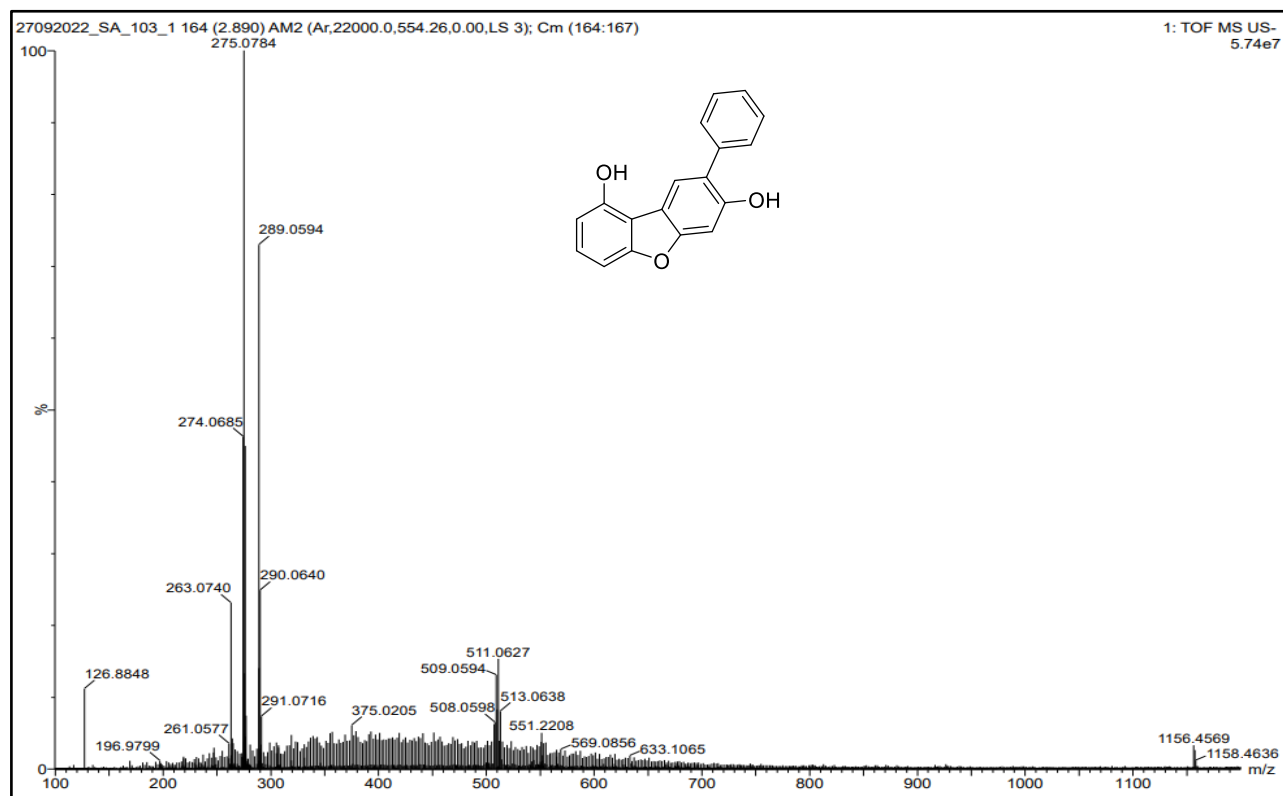

Figure 129: HRMS spectrum of compound 7a

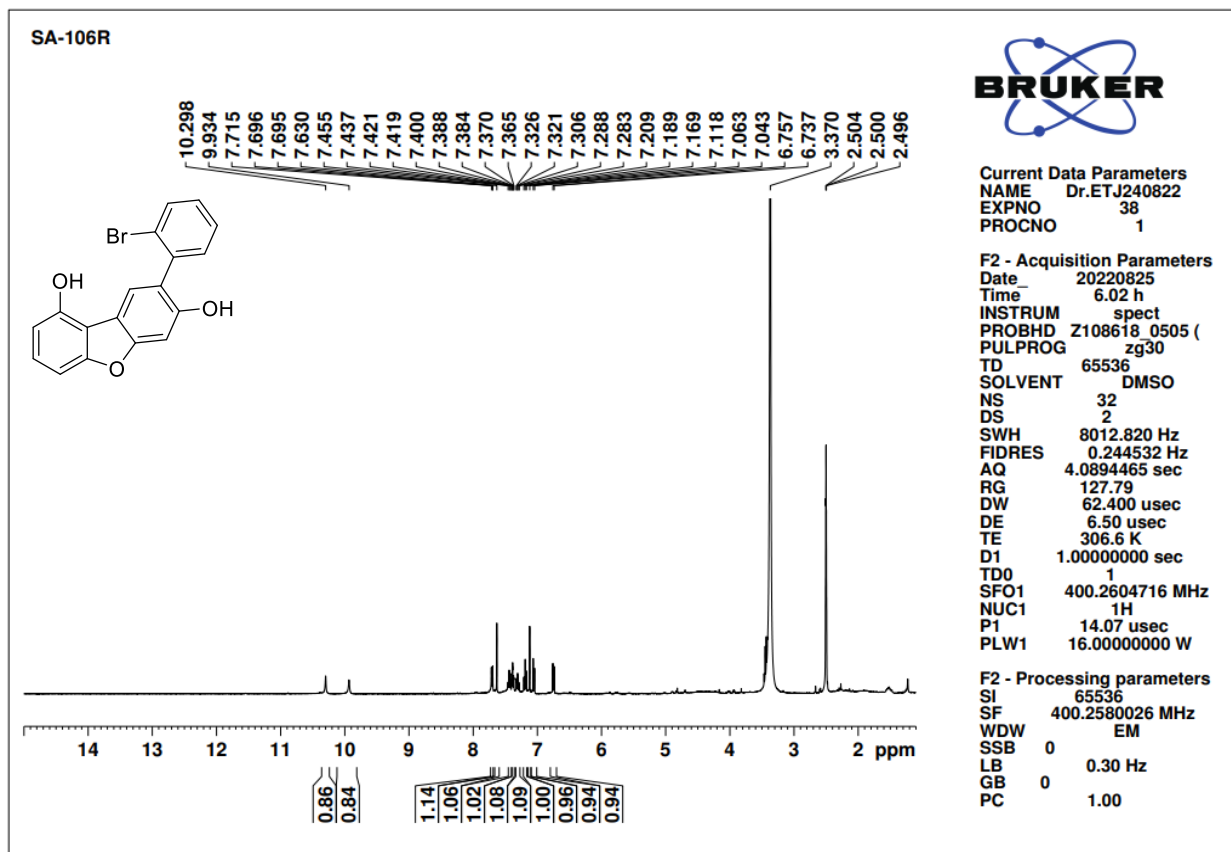Figure 130:  $^1\text{H}$  NMR spectrum of compound 7b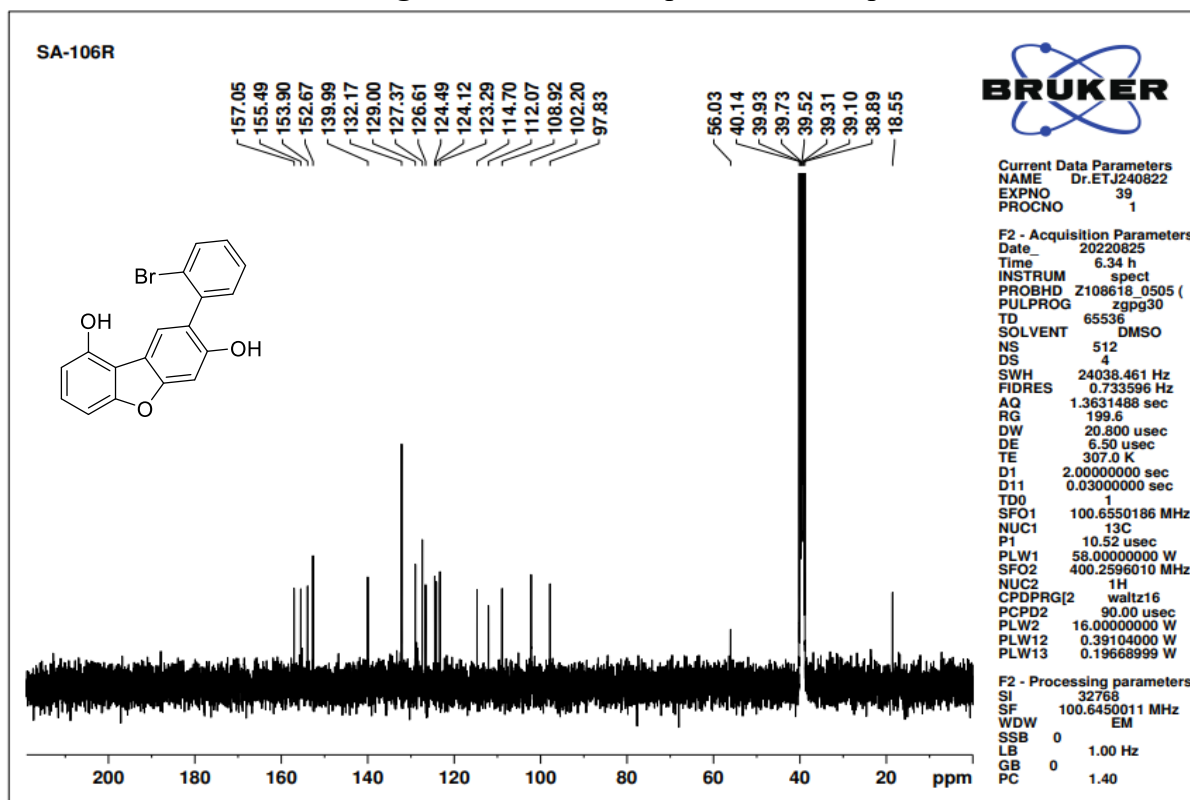Figure 131:  $^{13}\text{C}$  NMR spectrum of compound 7b

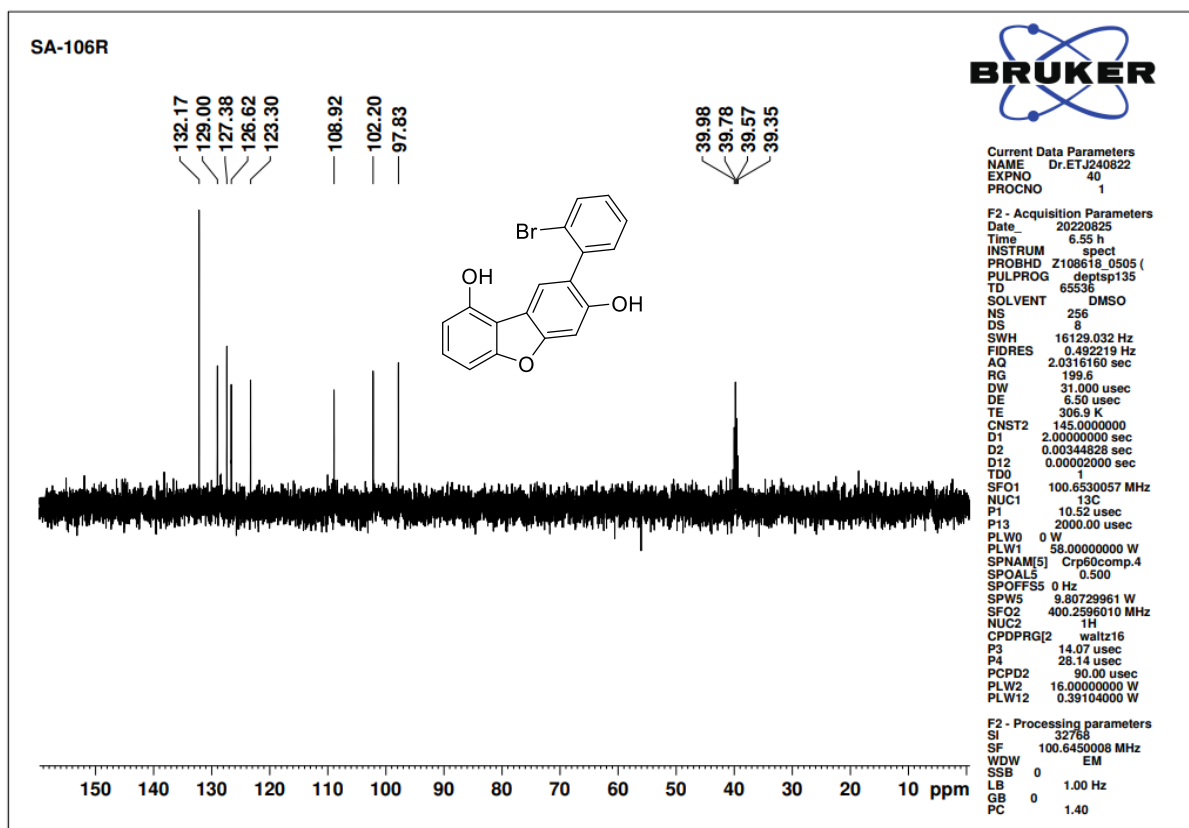

Figure 132: DEPT-135 NMR spectrum of compound 7b

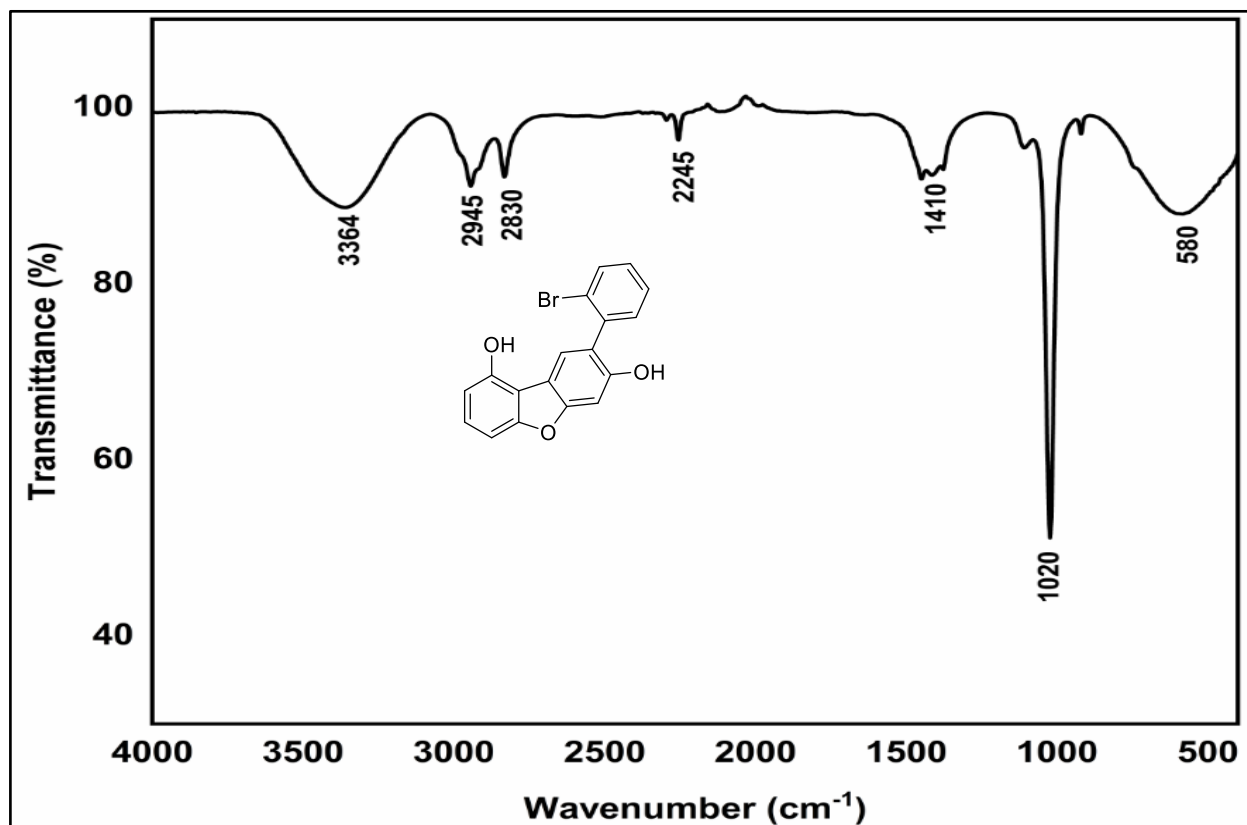

Figure 133: FT-IR spectrum of compound 7b

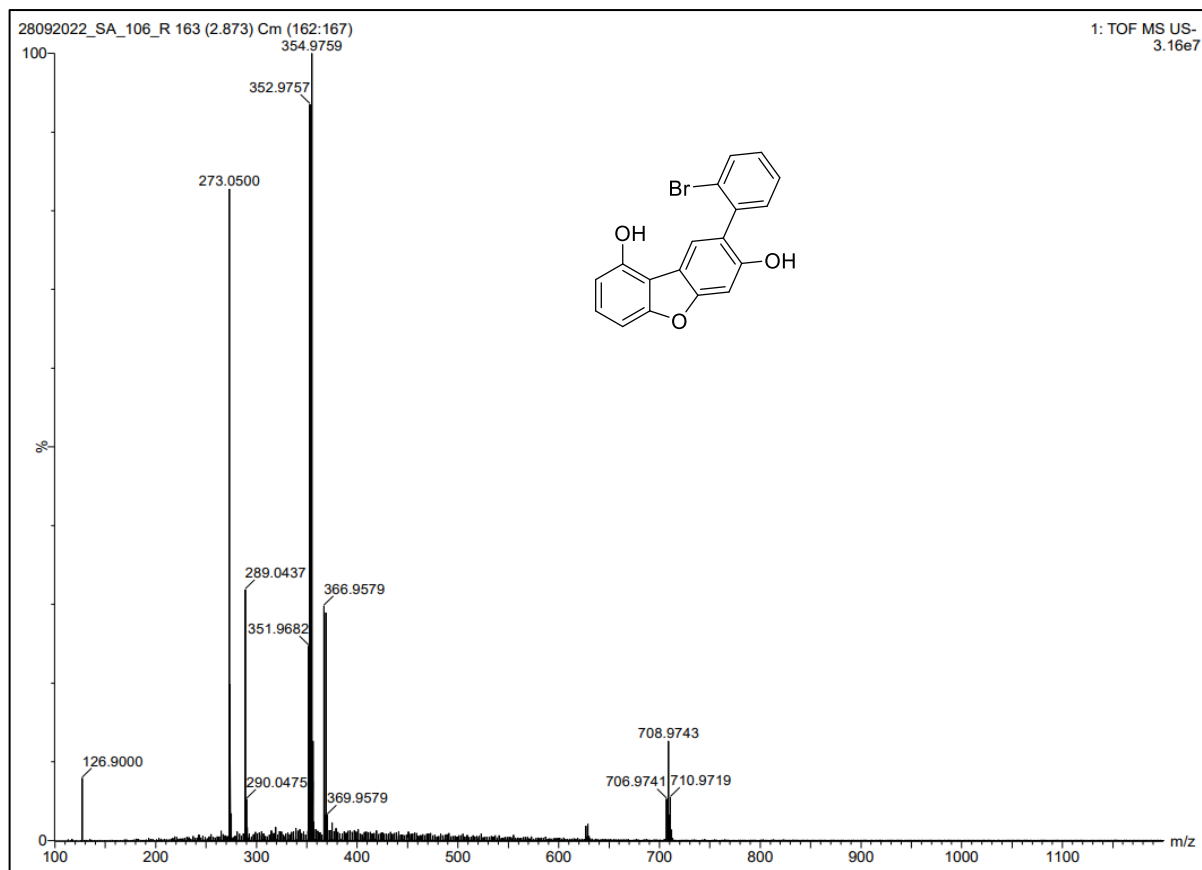

Figure 134: HRMS spectrum of compound 7b

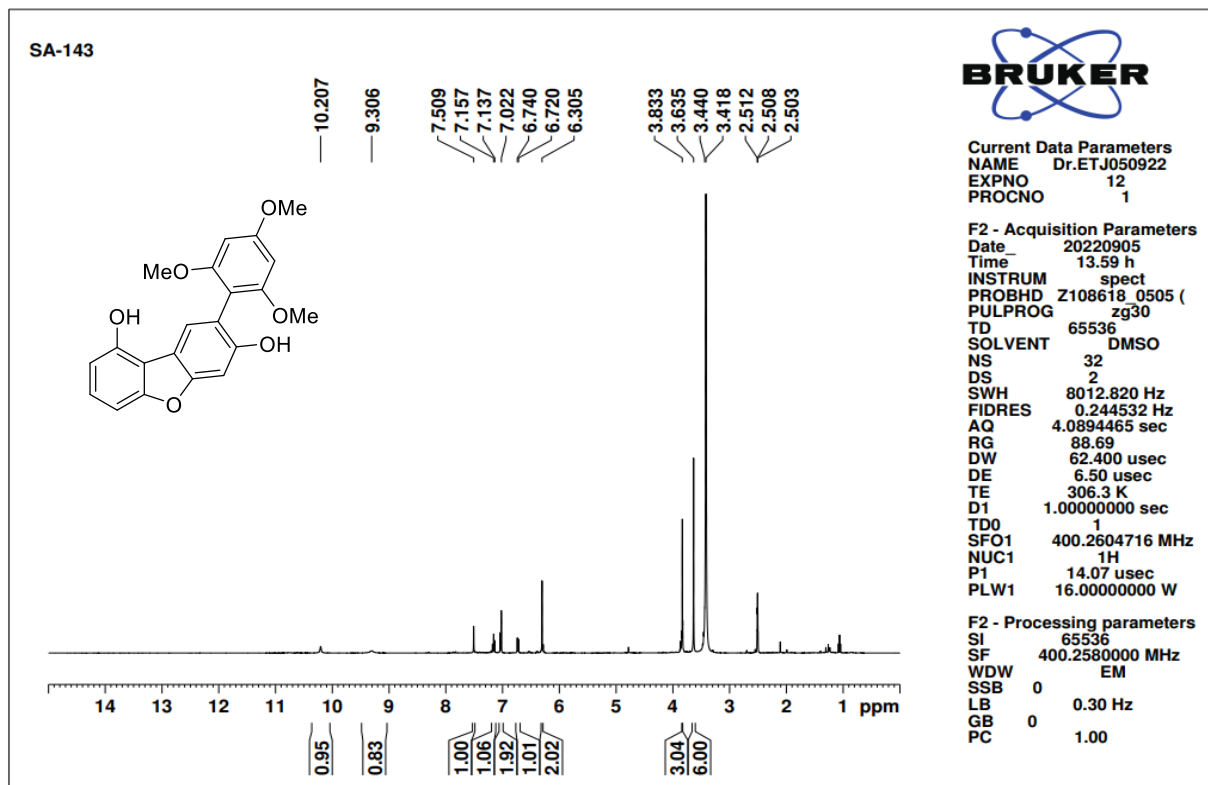Figure 135:  $^1\text{H}$  NMR spectrum of compound 7c

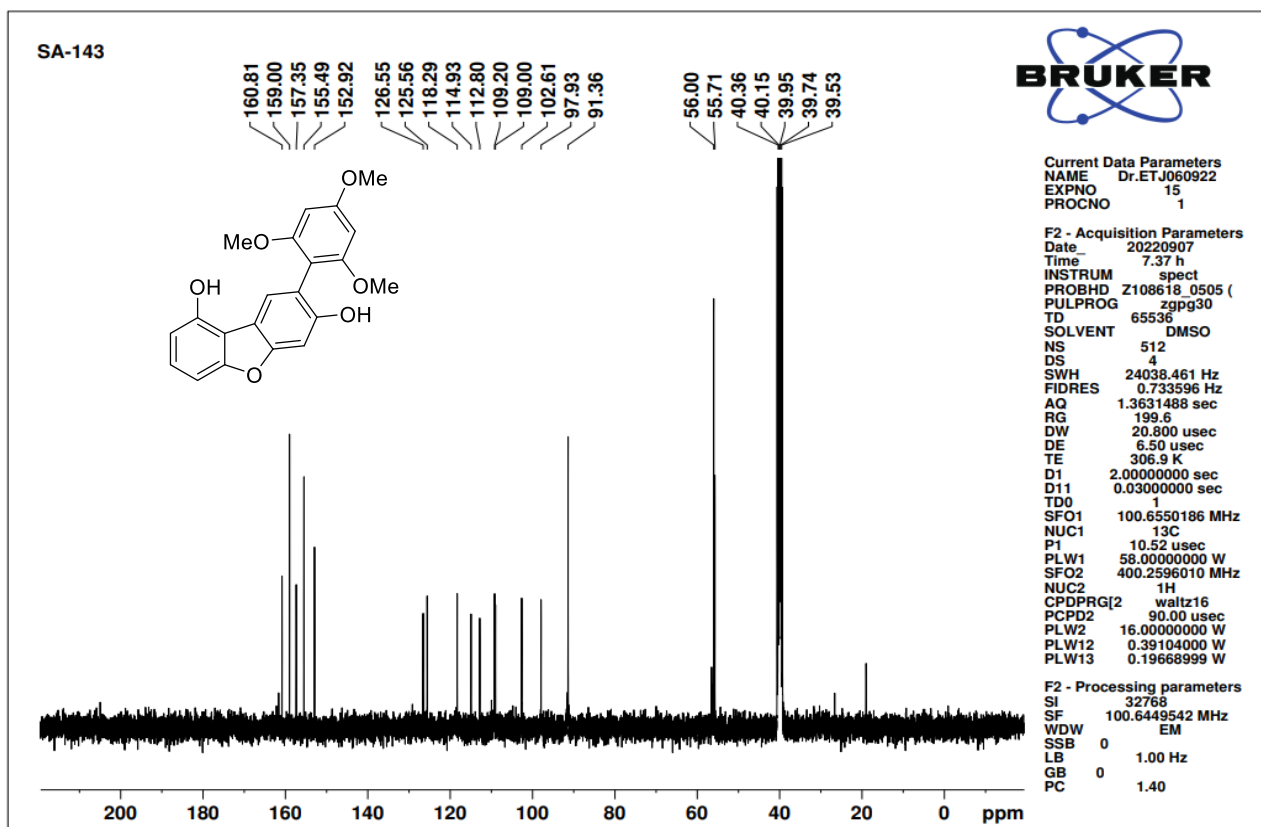Figure 136:  $^{13}\text{C}$  NMR spectrum of compound 7c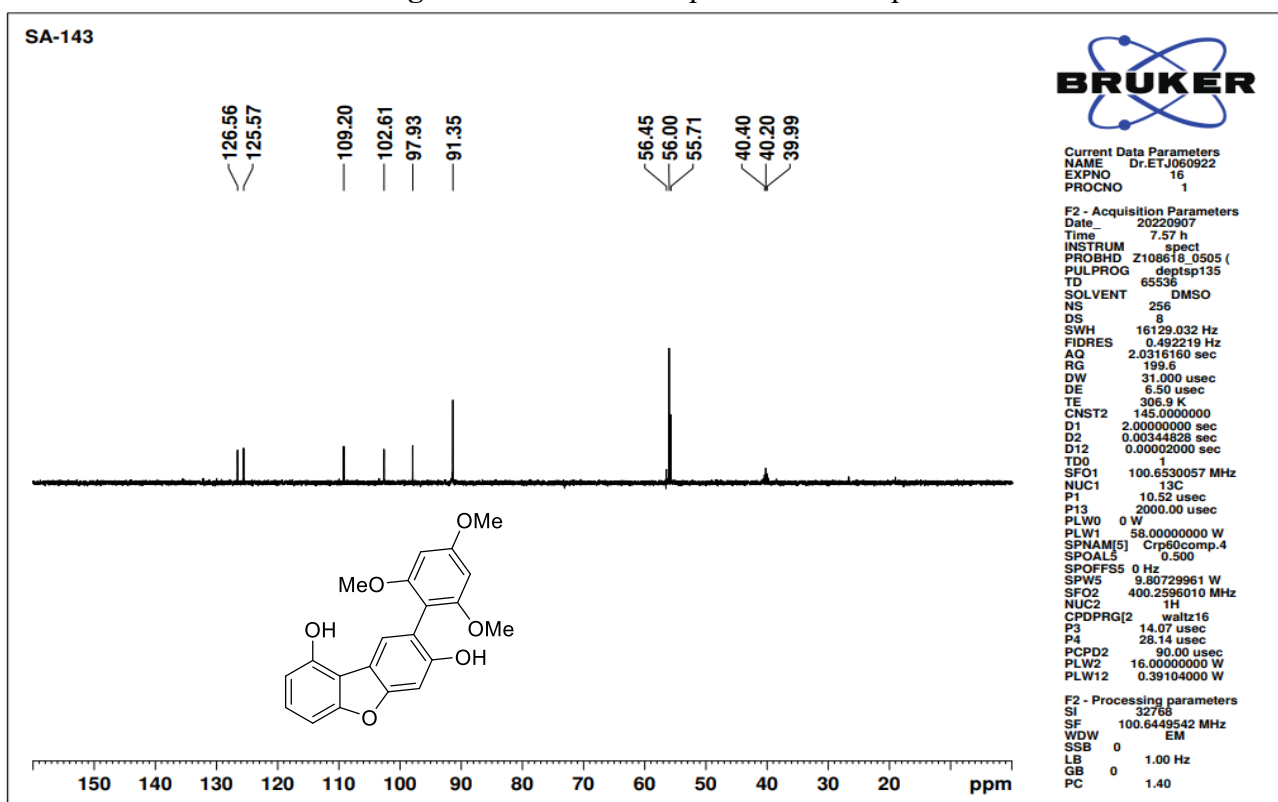

Figure 137: DEPT-135 NMR spectrum of compound 7c

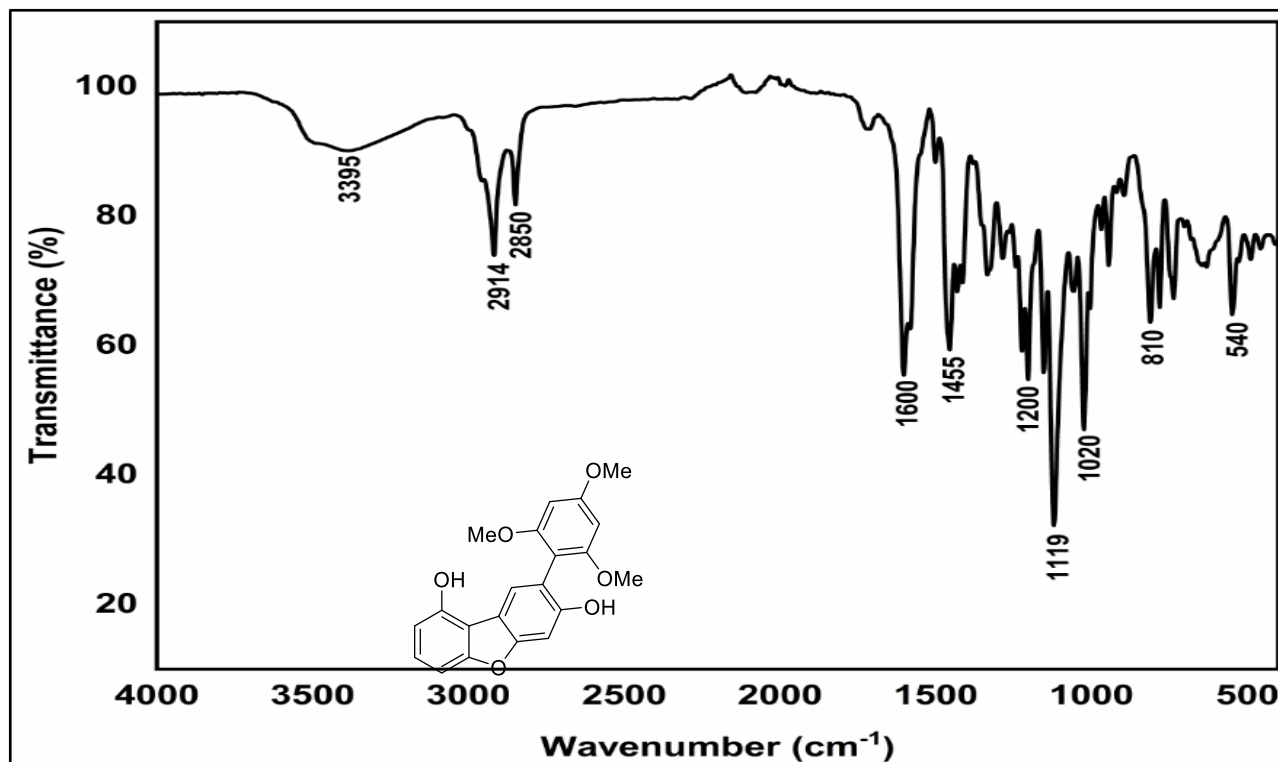**Figure 138:** FT-IR spectrum of compound 7c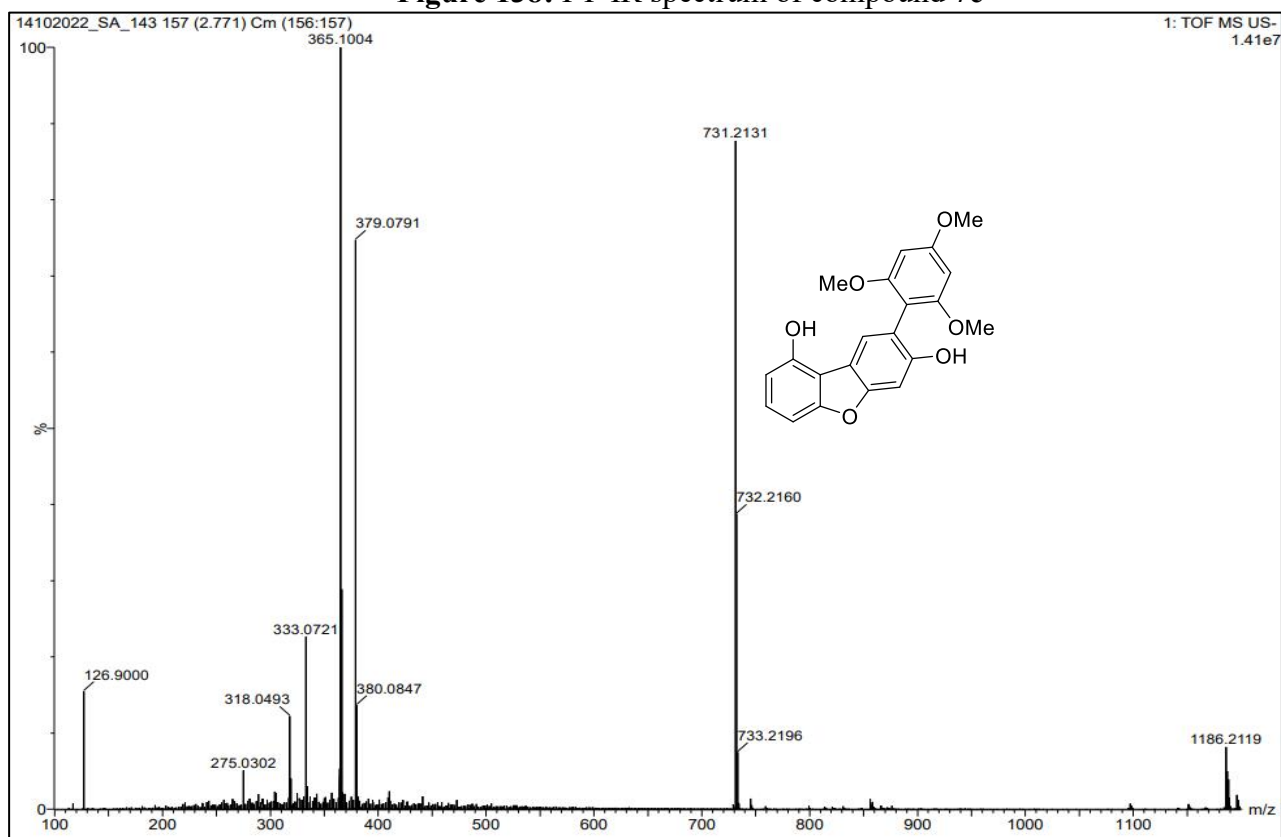**Figure 139:** HRMS spectrum of compound 7c

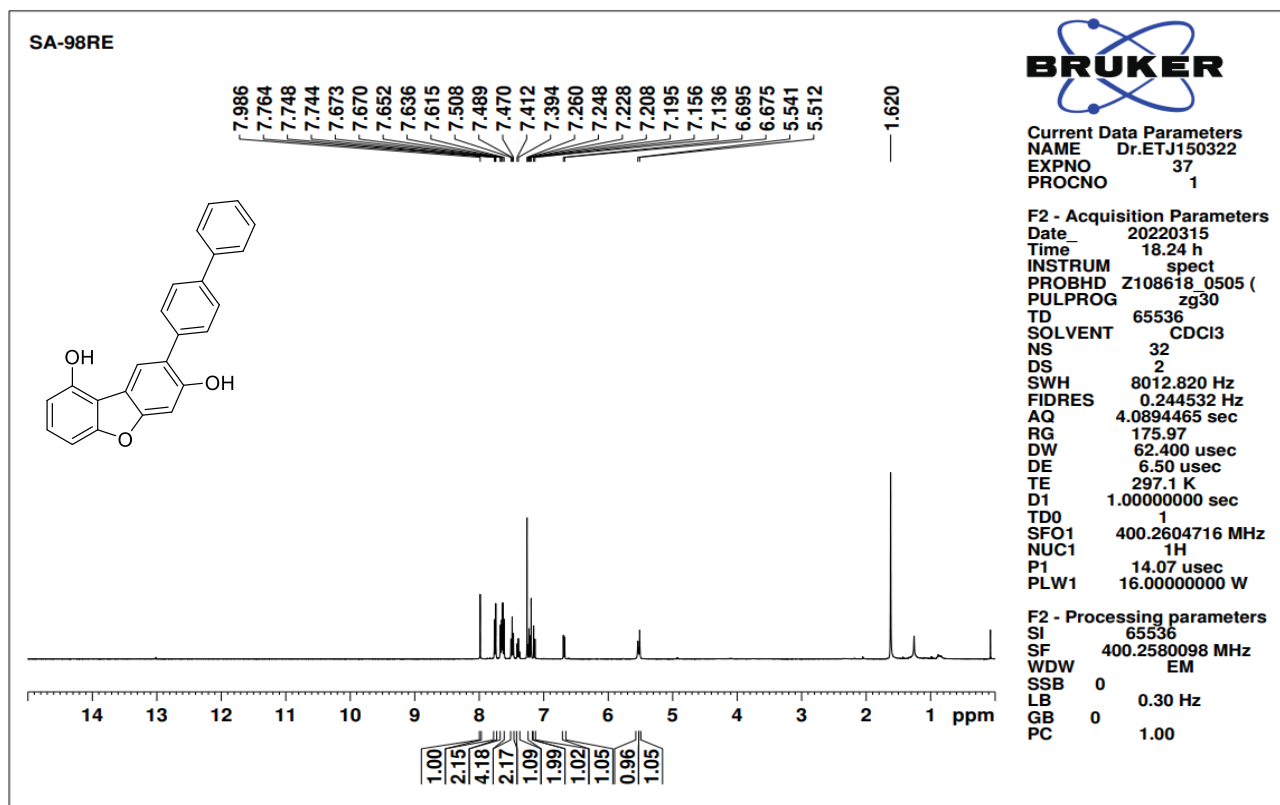Figure 140:  $^1\text{H}$  NMR spectrum of compound 7d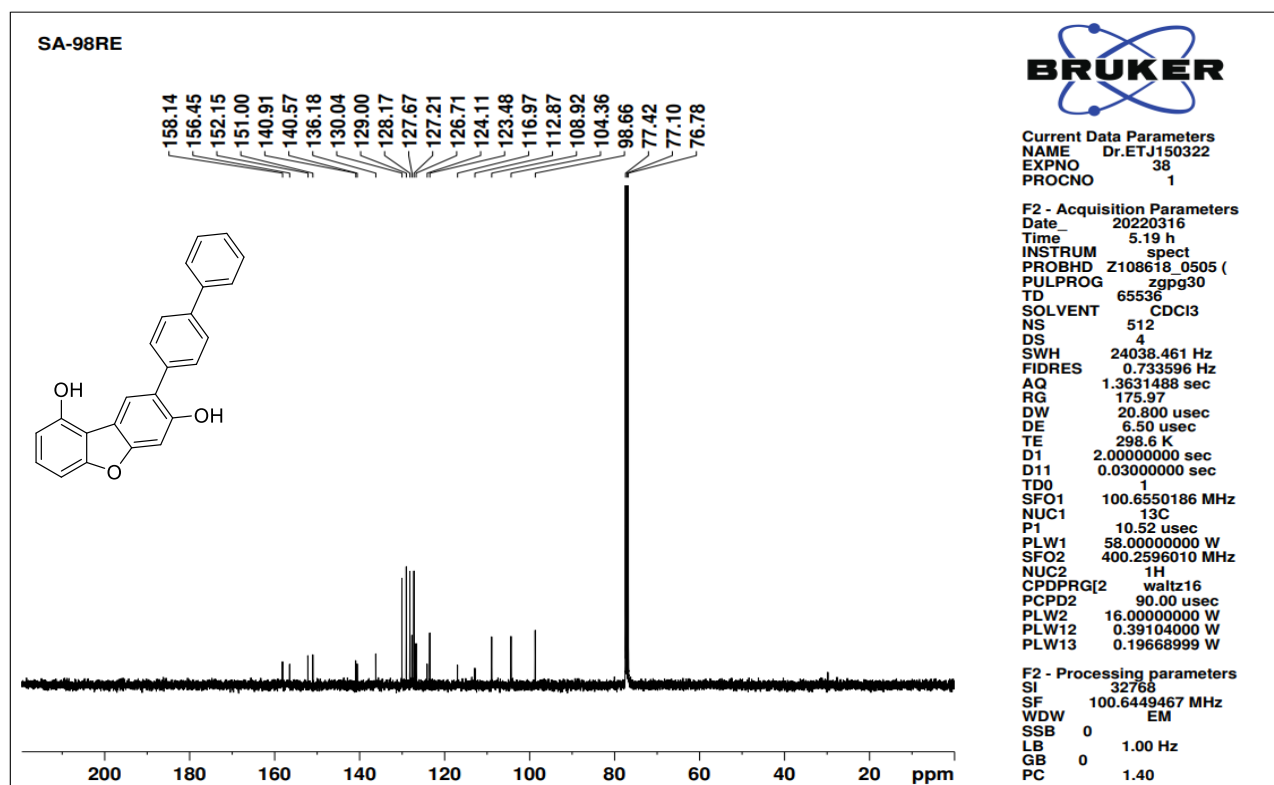Figure 141:  $^{13}\text{C}$  NMR spectrum of compound 7d



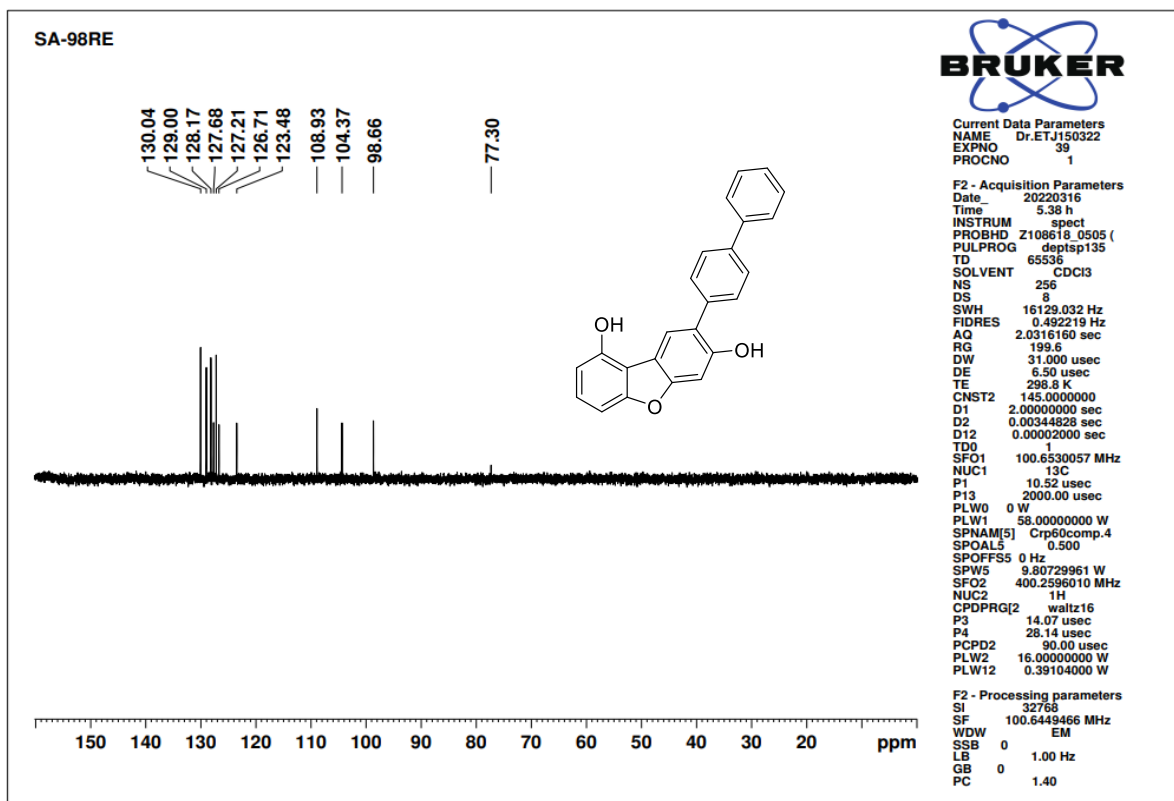

Figure 142: DEPT-135 NMR spectrum of compound 7d

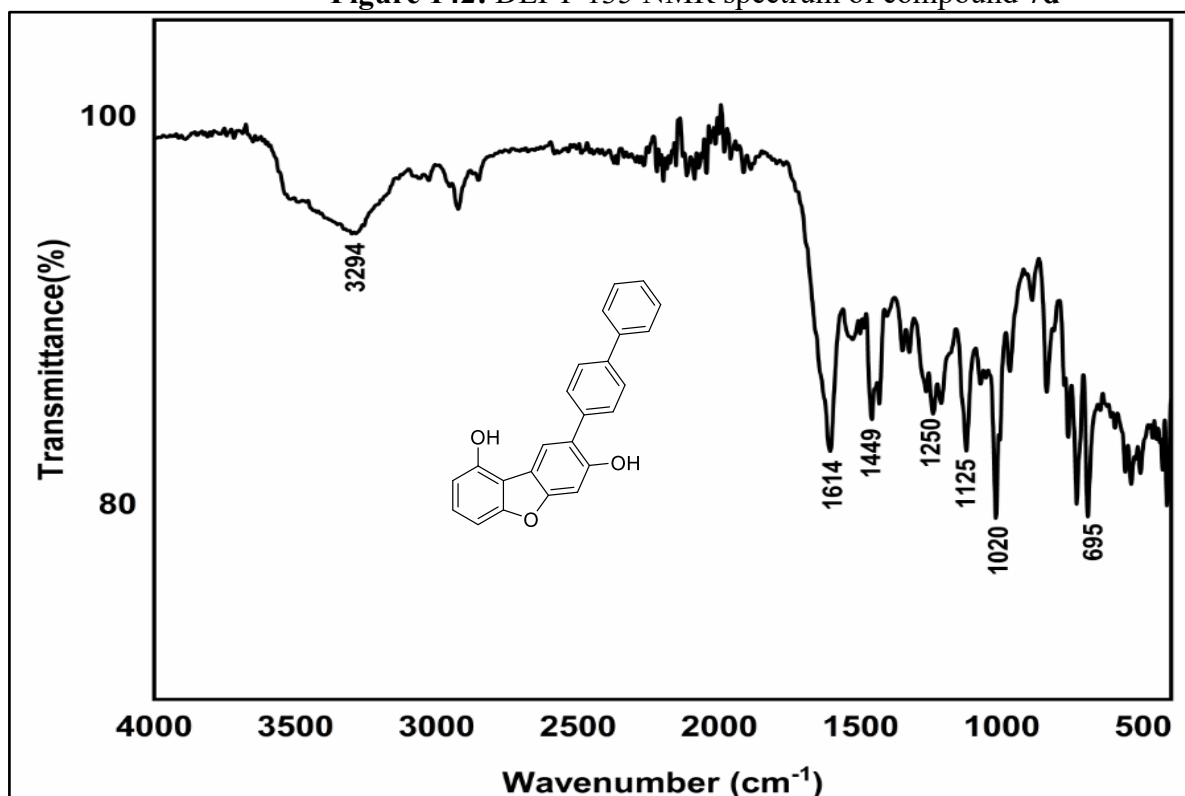

Figure 143: FT-IR spectrum of compound 7d

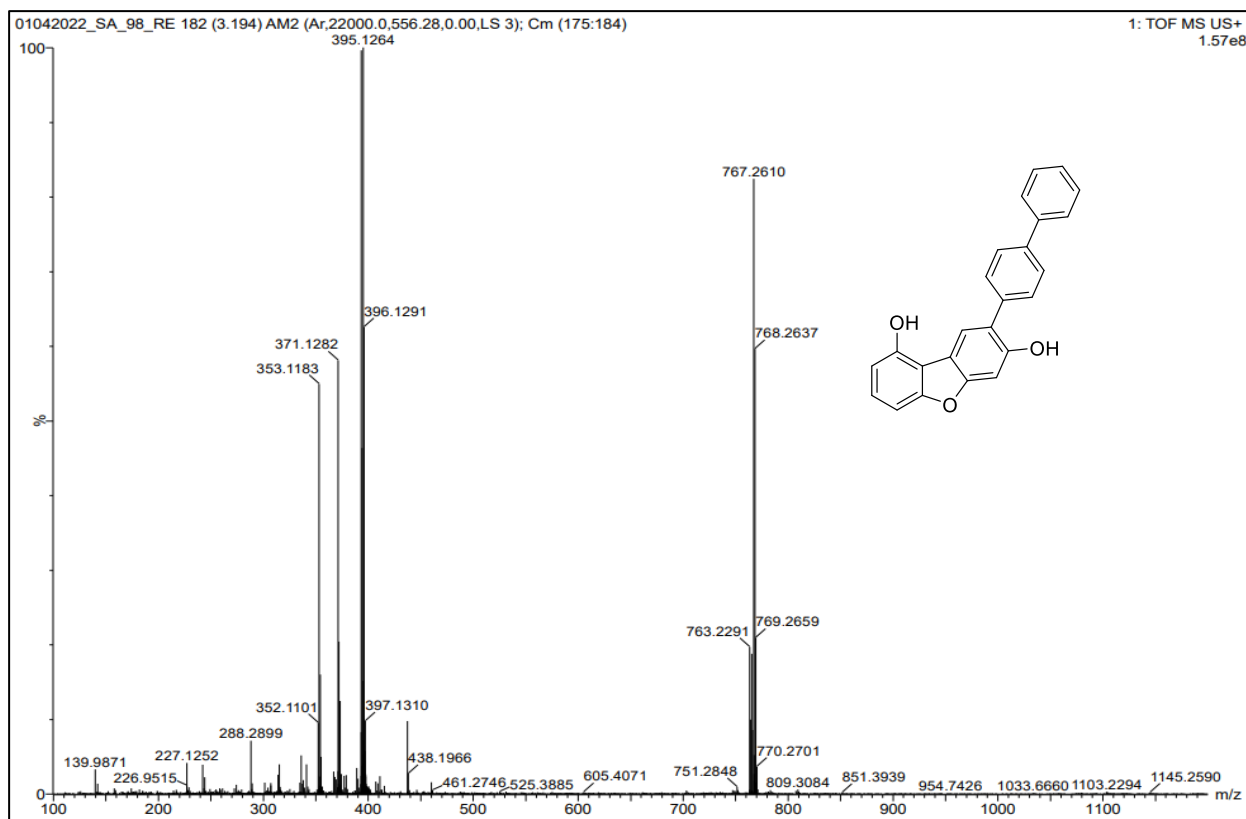

Figure 144: HRMS spectrum of compound 7d

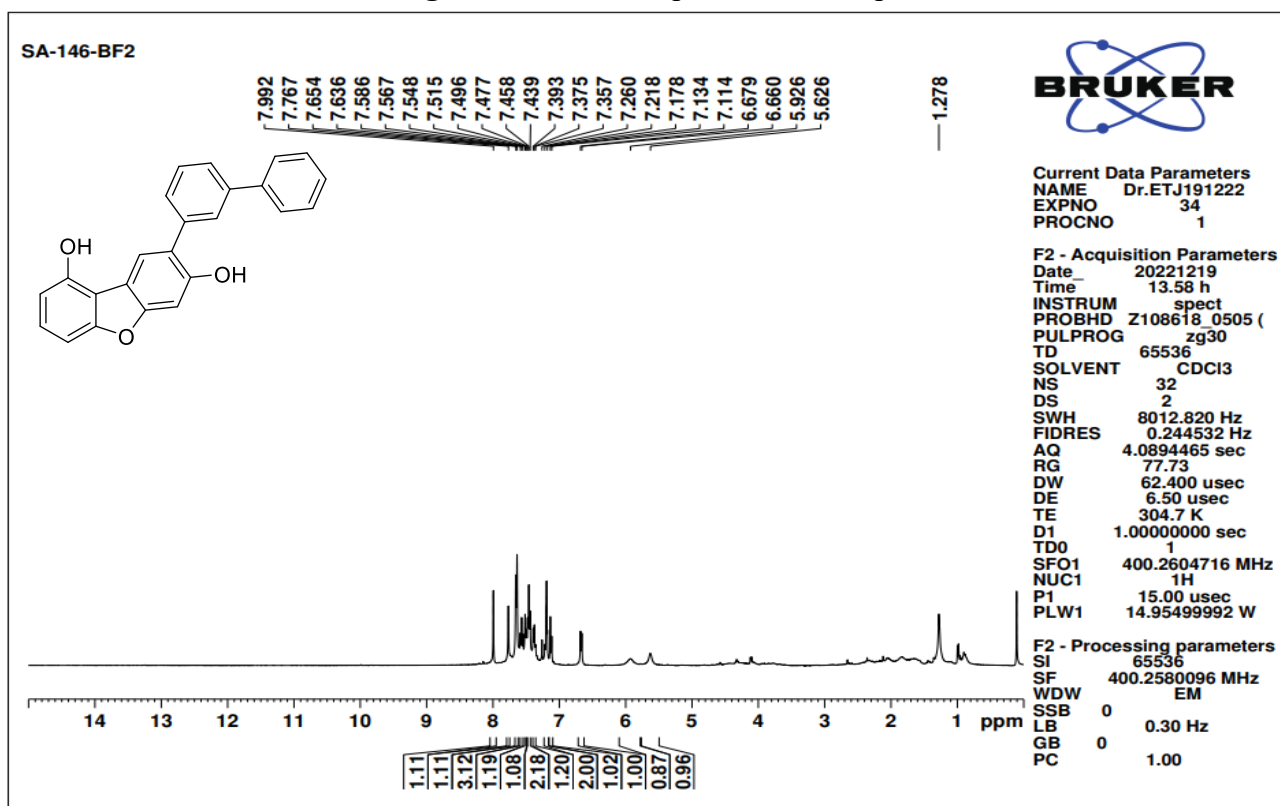Figure 145:  $^1\text{H}$  NMR spectrum of compound 7e

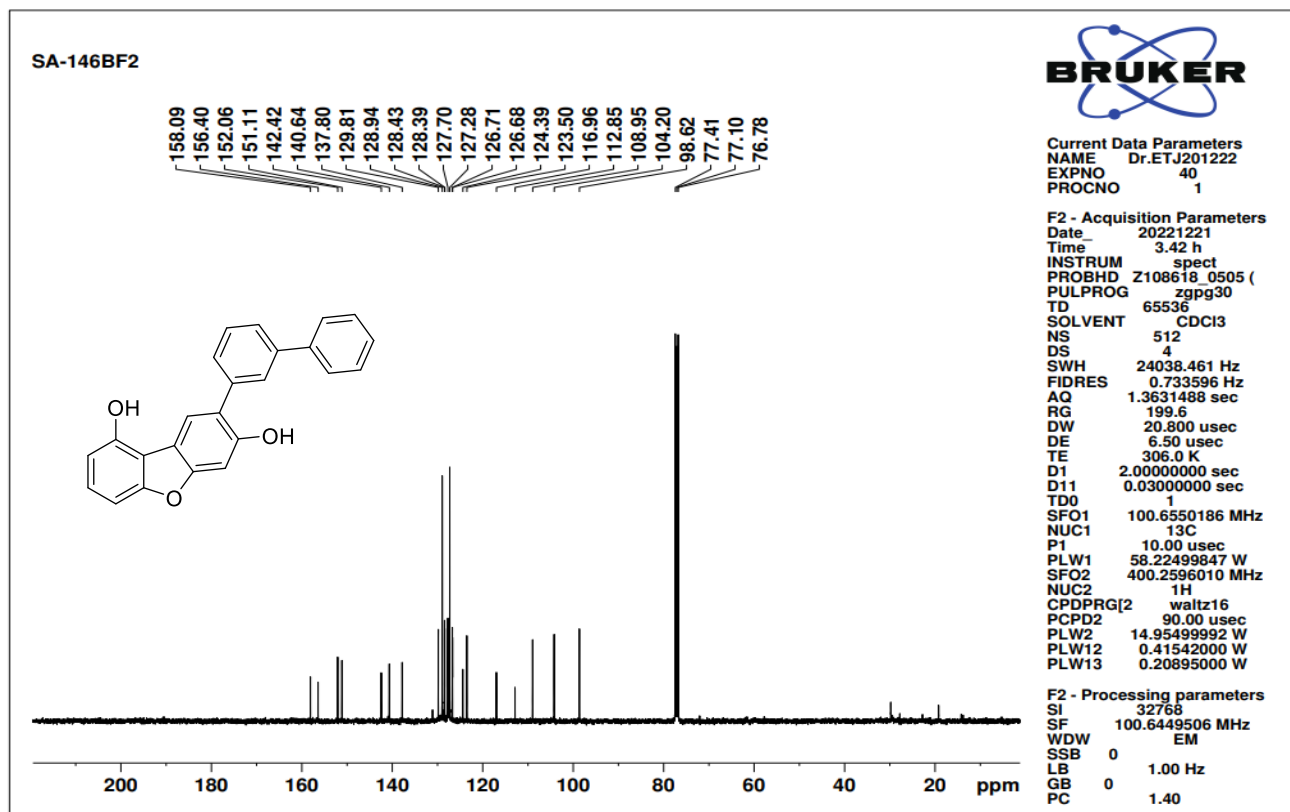Figure 146:  $^{13}\text{C}$  NMR spectrum of compound 7e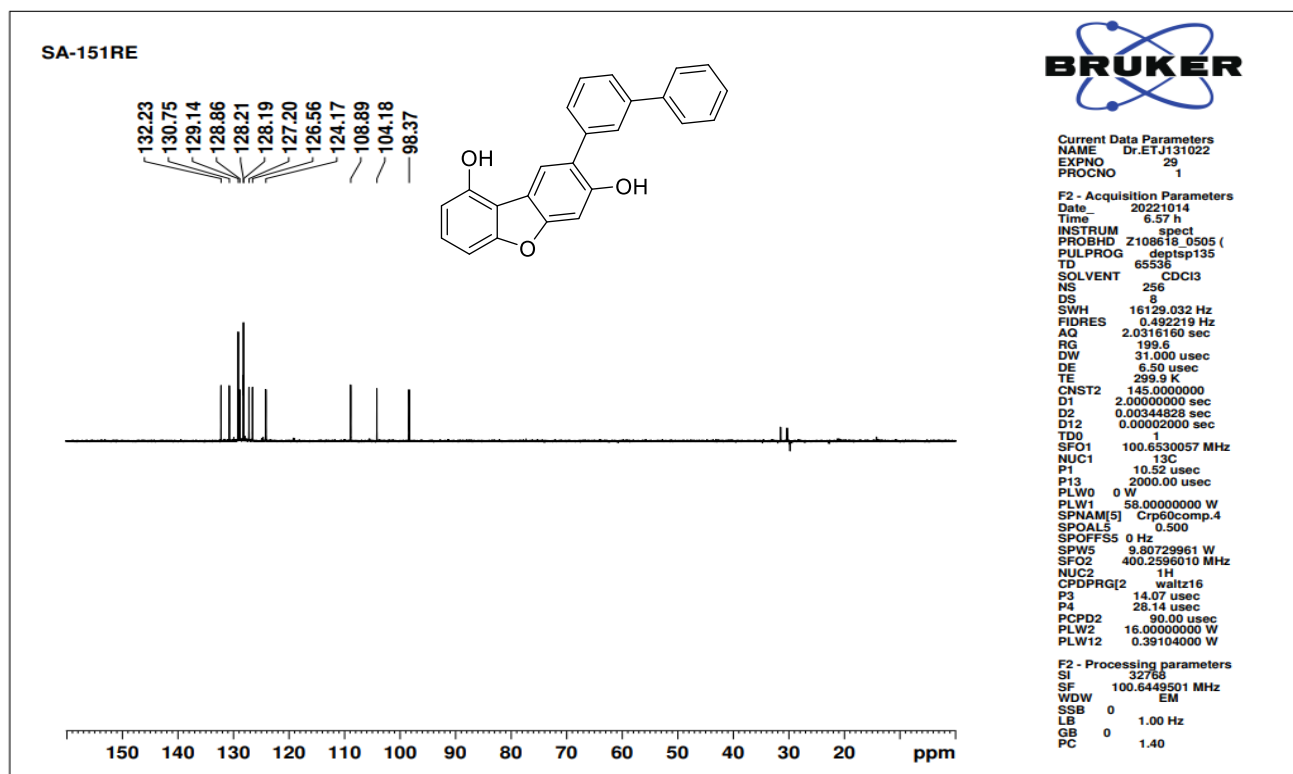

Figure 147: DEPT-135 NMR spectrum of compound 7e

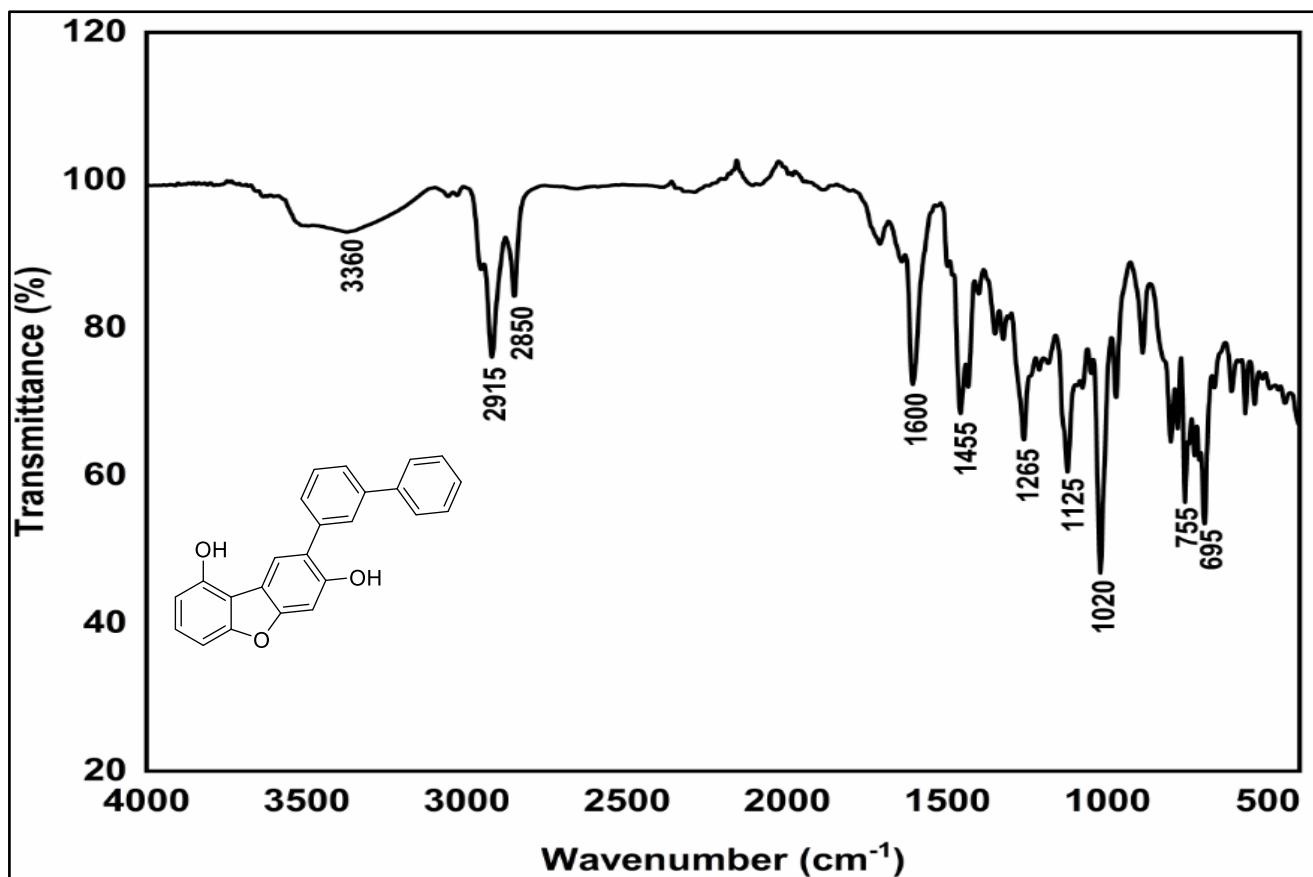

Figure 148: FT-IR spectrum of compound 7e

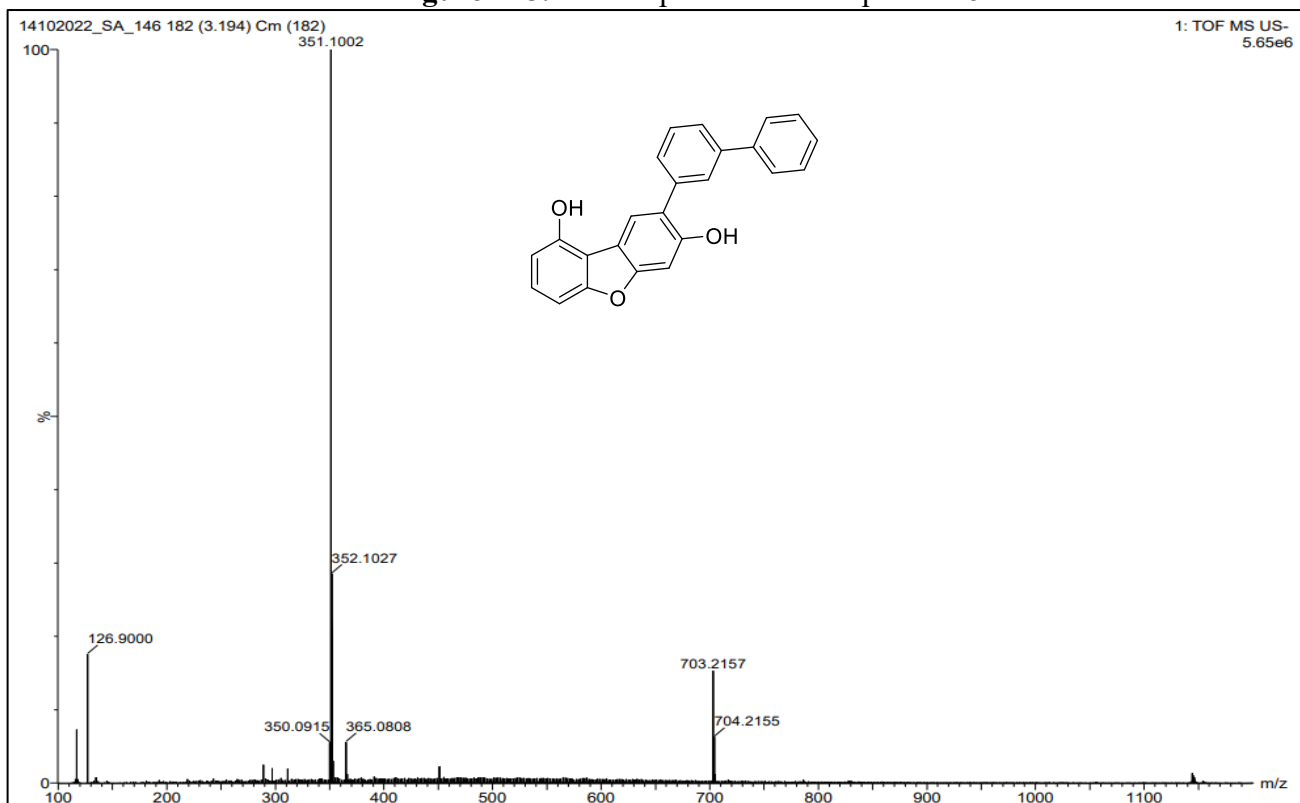

Figure 149: HRMS spectrum of compound 7e

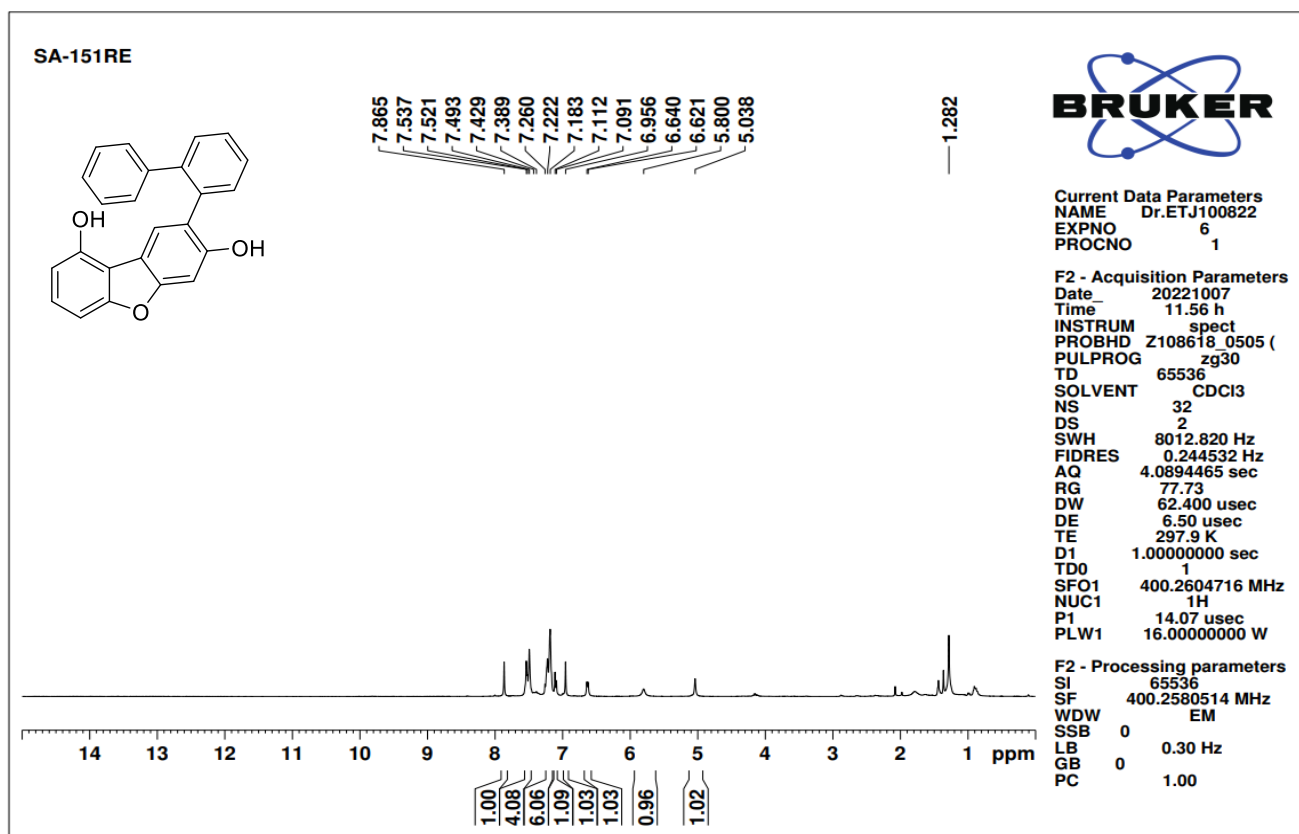Figure 150:  $^1\text{H}$  NMR spectrum of compound 7f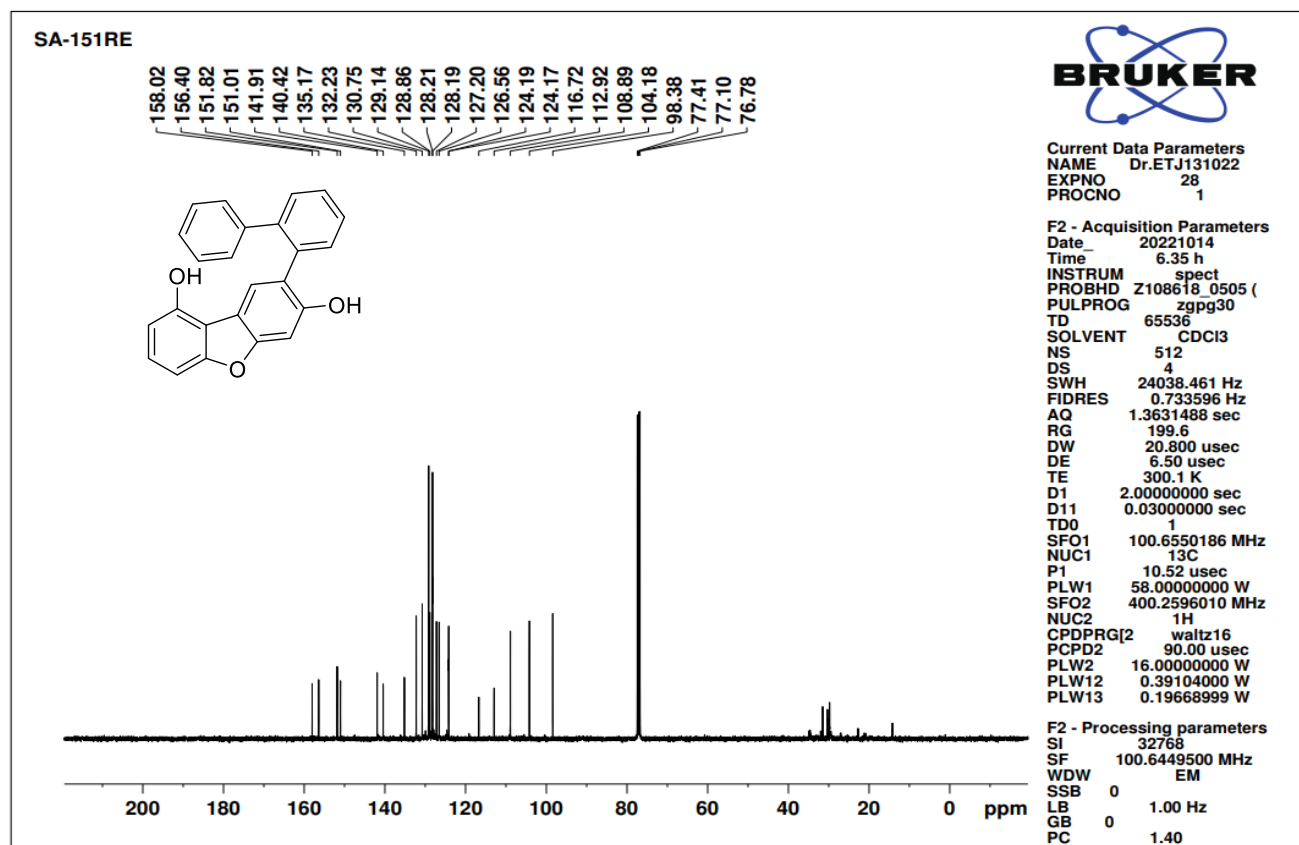Figure 151:  $^{13}\text{C}$  NMR spectrum of compound 7f

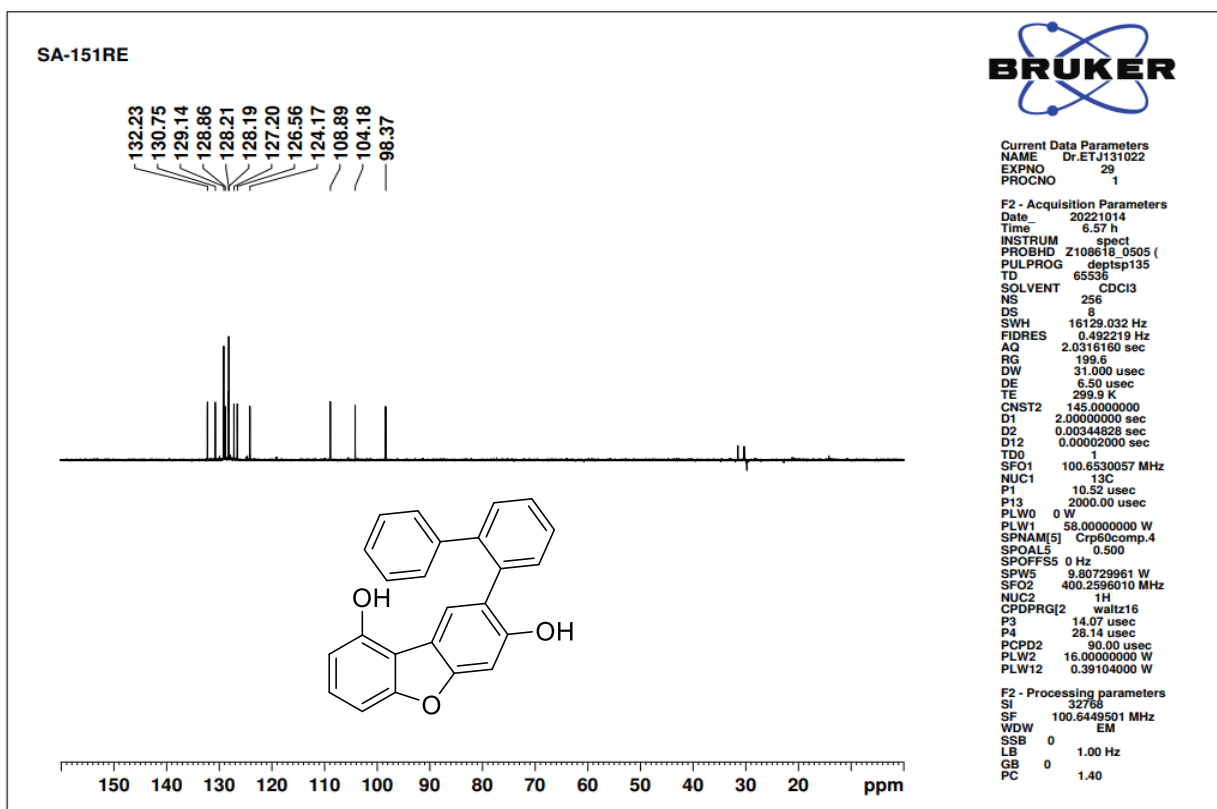

Figure 152: DEPT-135 NMR spectrum of compound 7f

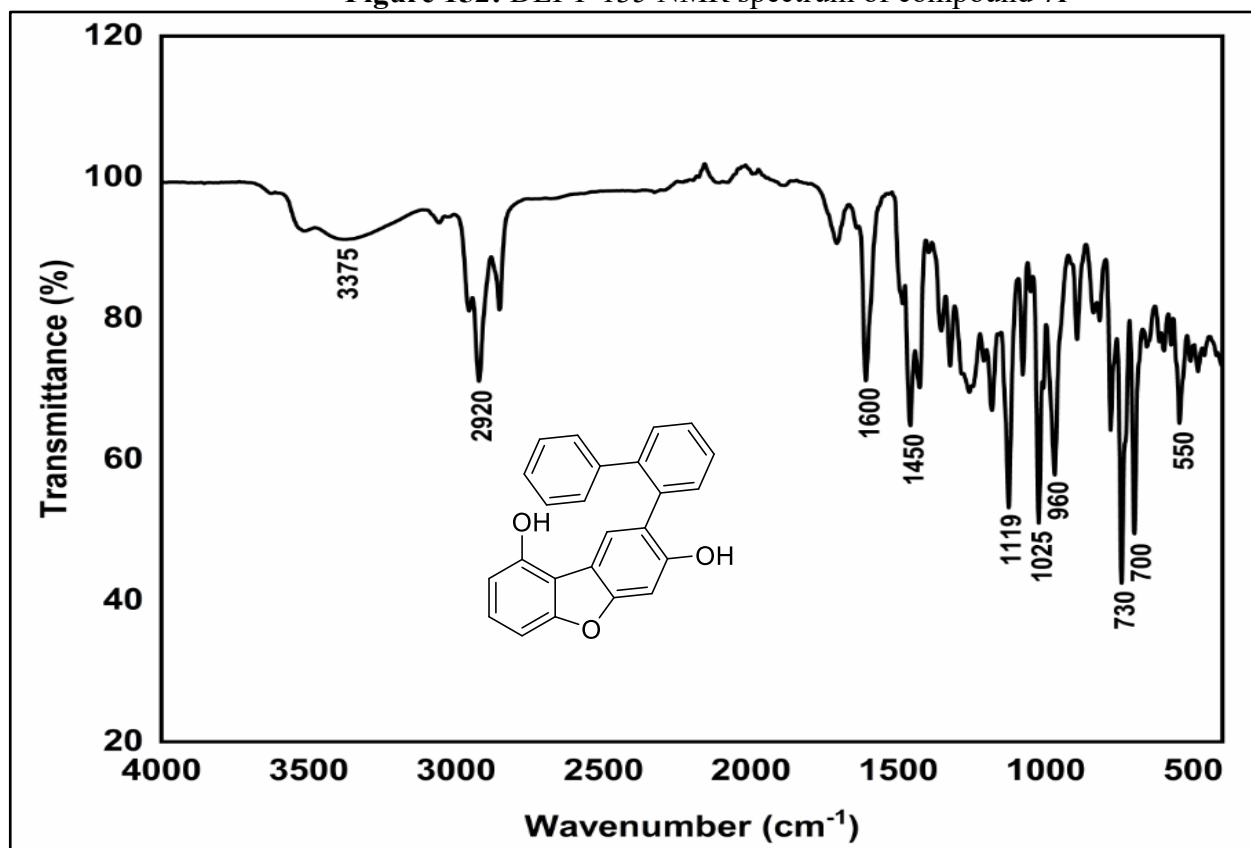

Figure 153: FT-IR spectrum of compound 7f

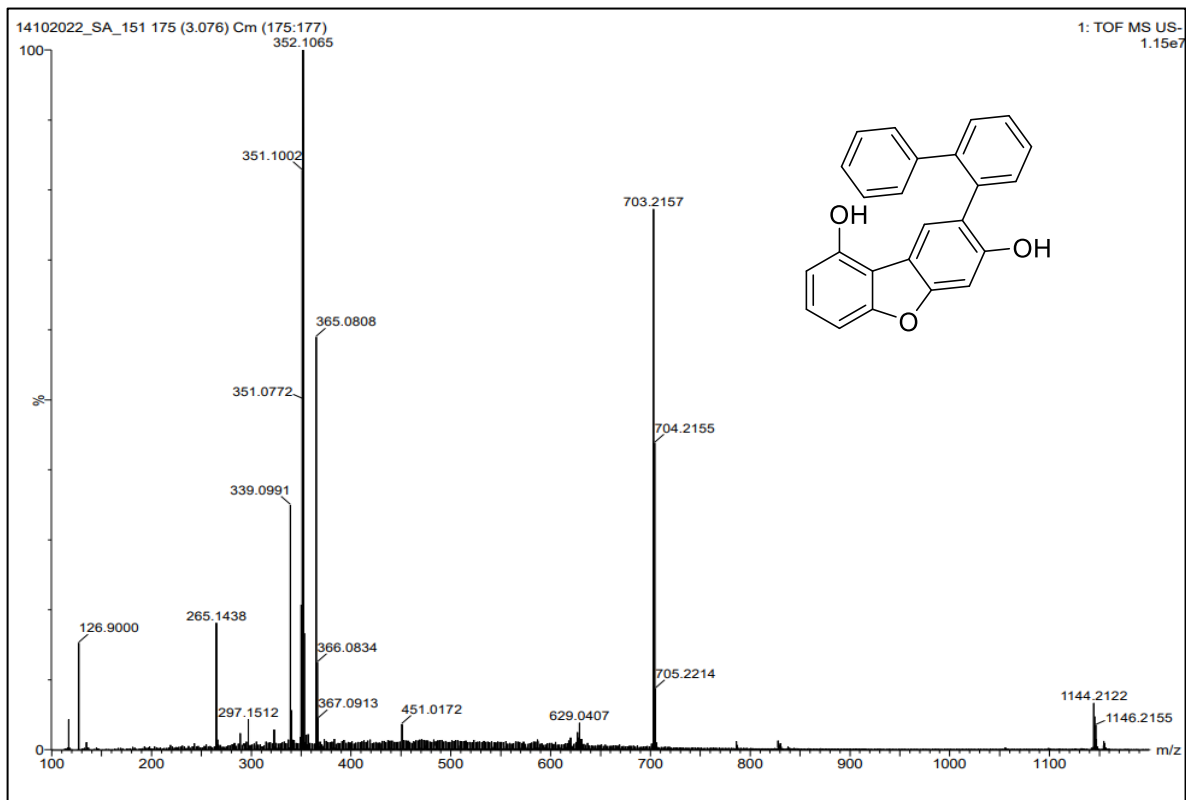

Figure 154: HRMS spectrum of compound 7f

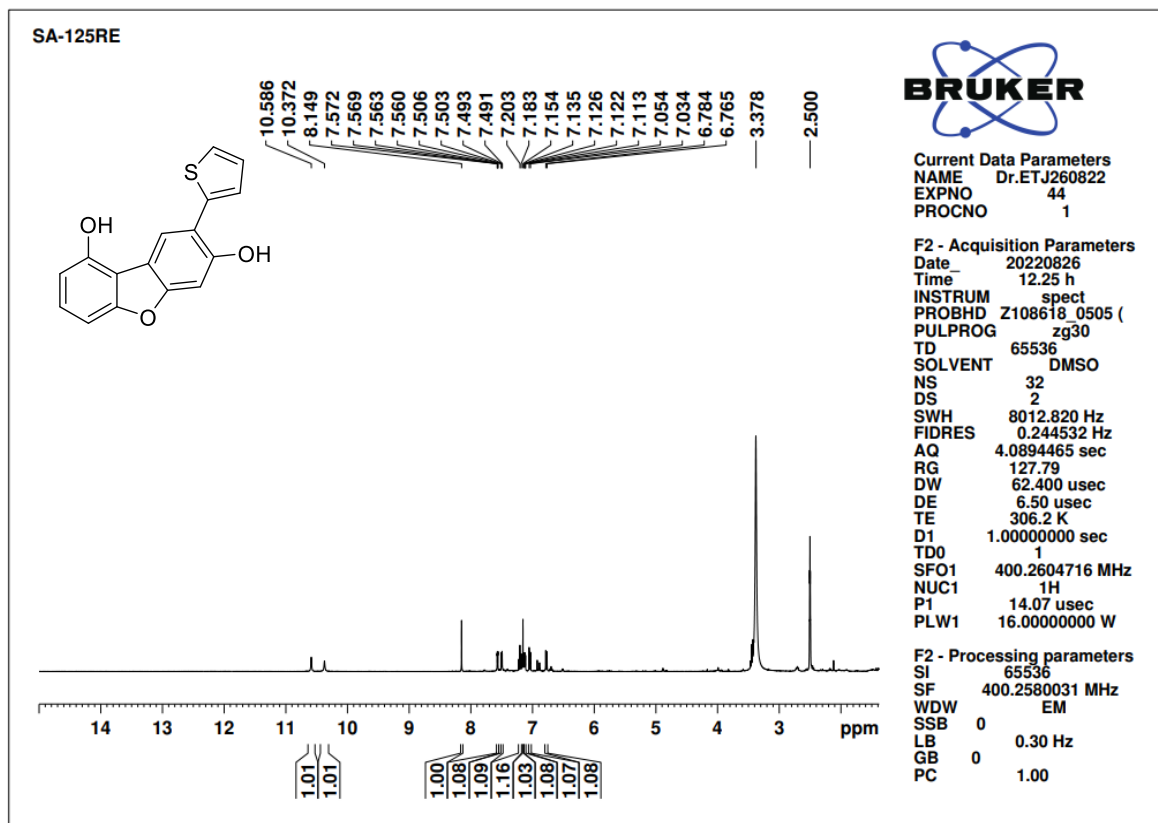Figure 155:  $^1\text{H}$  NMR spectrum of compound 7g

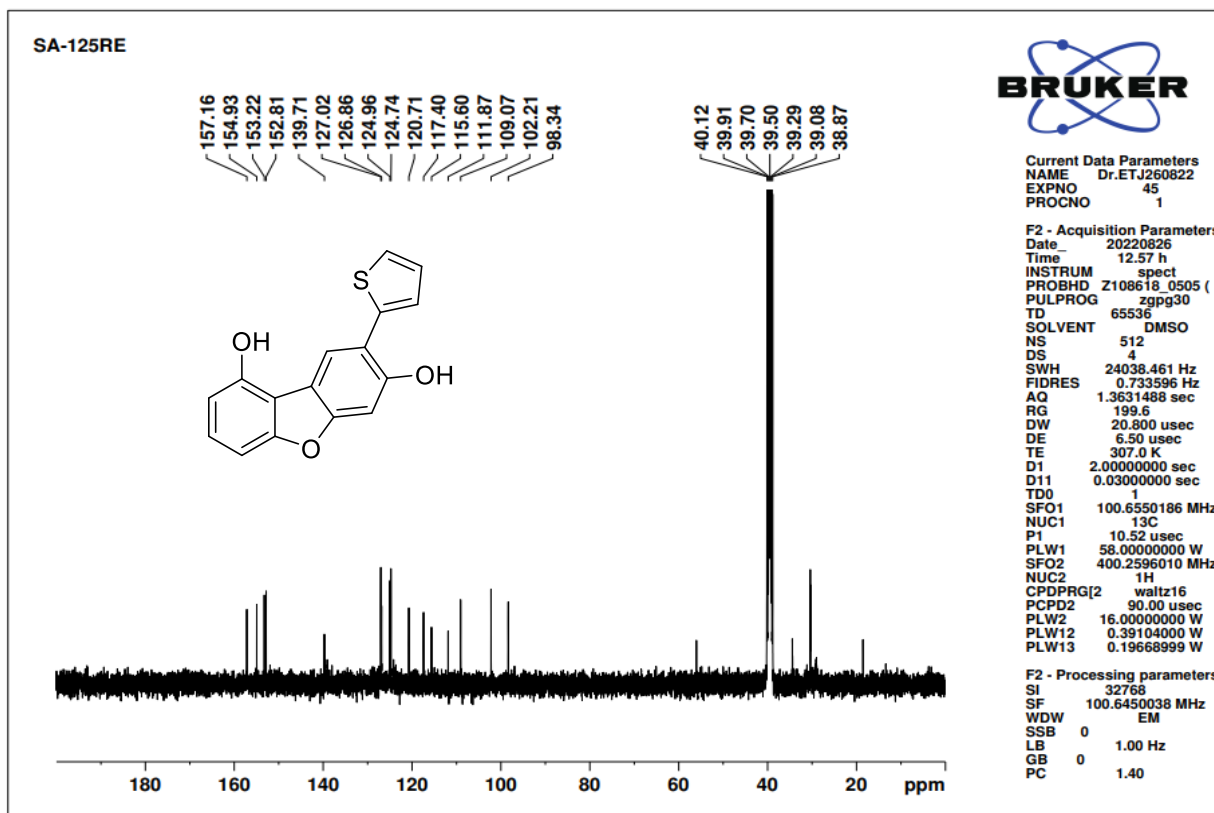Figure 156:  $^{13}\text{C}$  NMR spectrum of compound 7g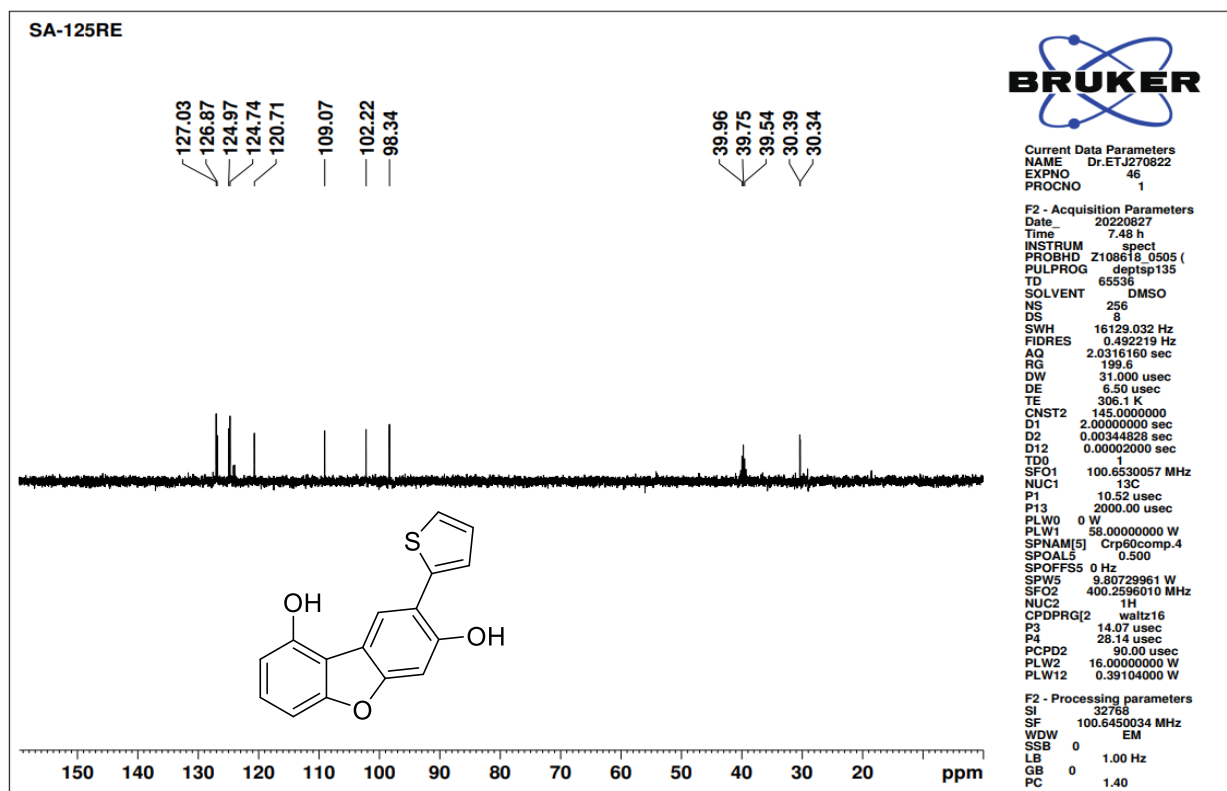

Figure 157: DEPT-135 NMR spectrum of compound 7g



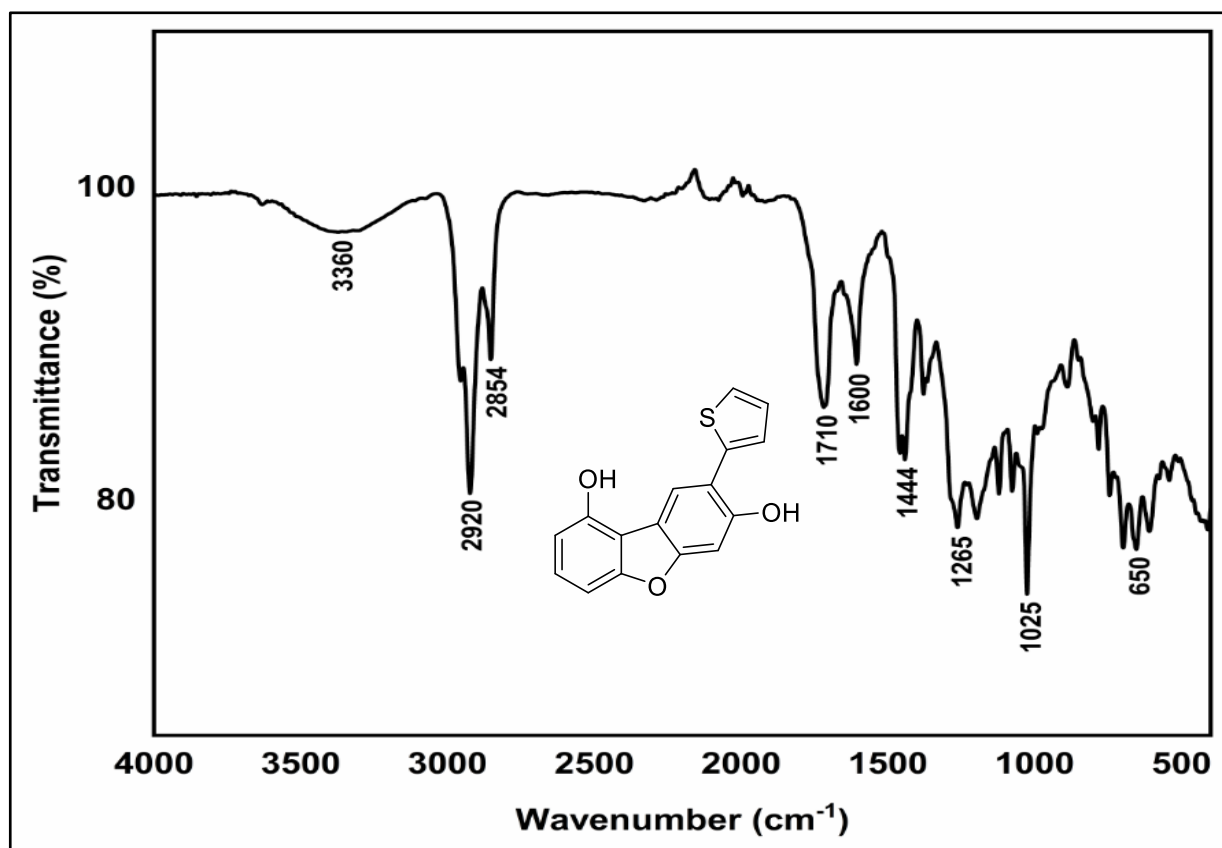

Figure 158: FT-IR spectrum of compound 7g

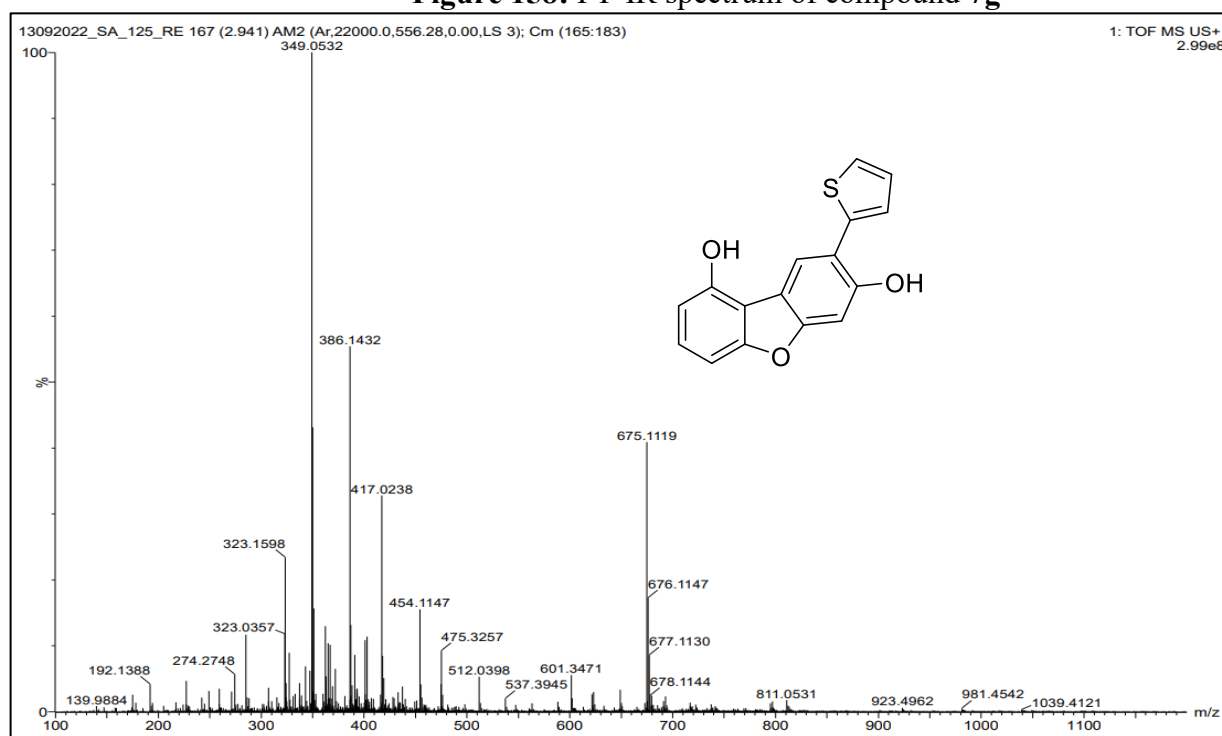

Figure 159: HRMS spectrum of compound 7g

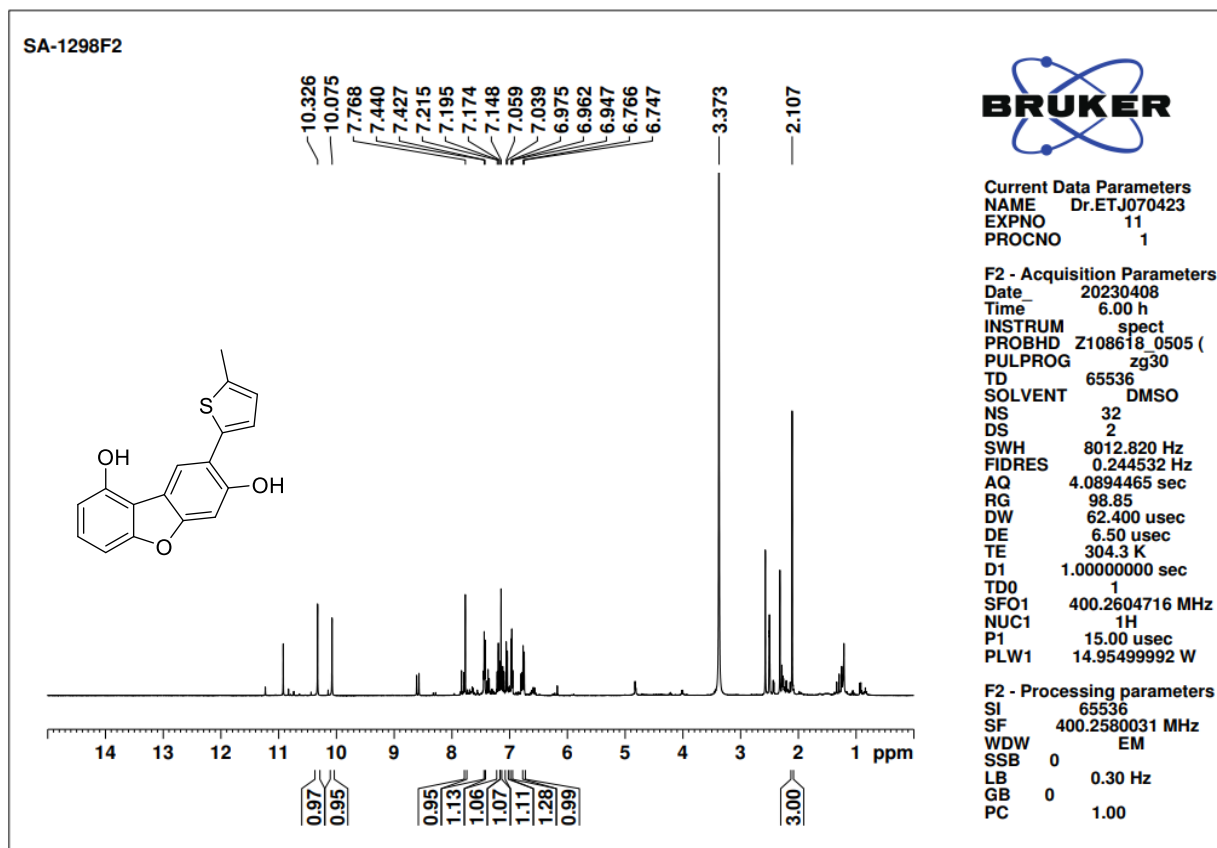Figure 160:  $^1\text{H}$  NMR spectrum of compound 7h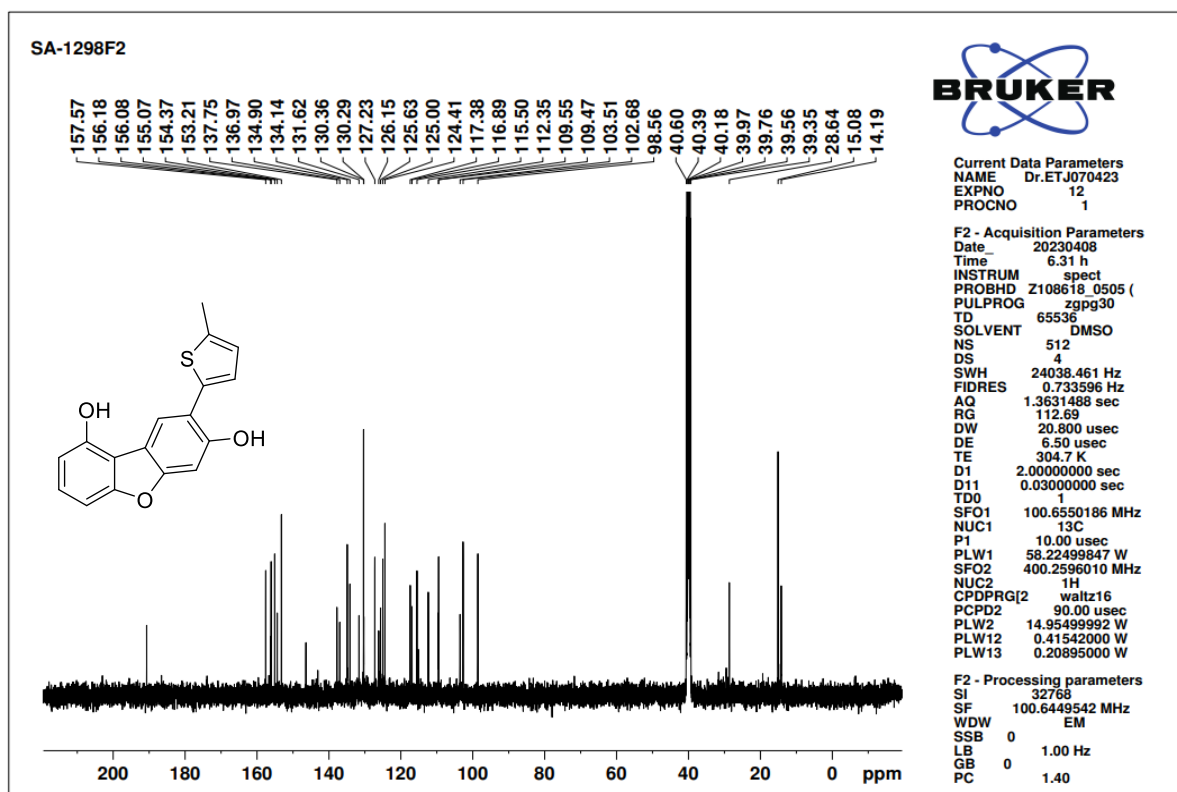Figure 161:  $^{13}\text{C}$  NMR spectrum of compound 7h

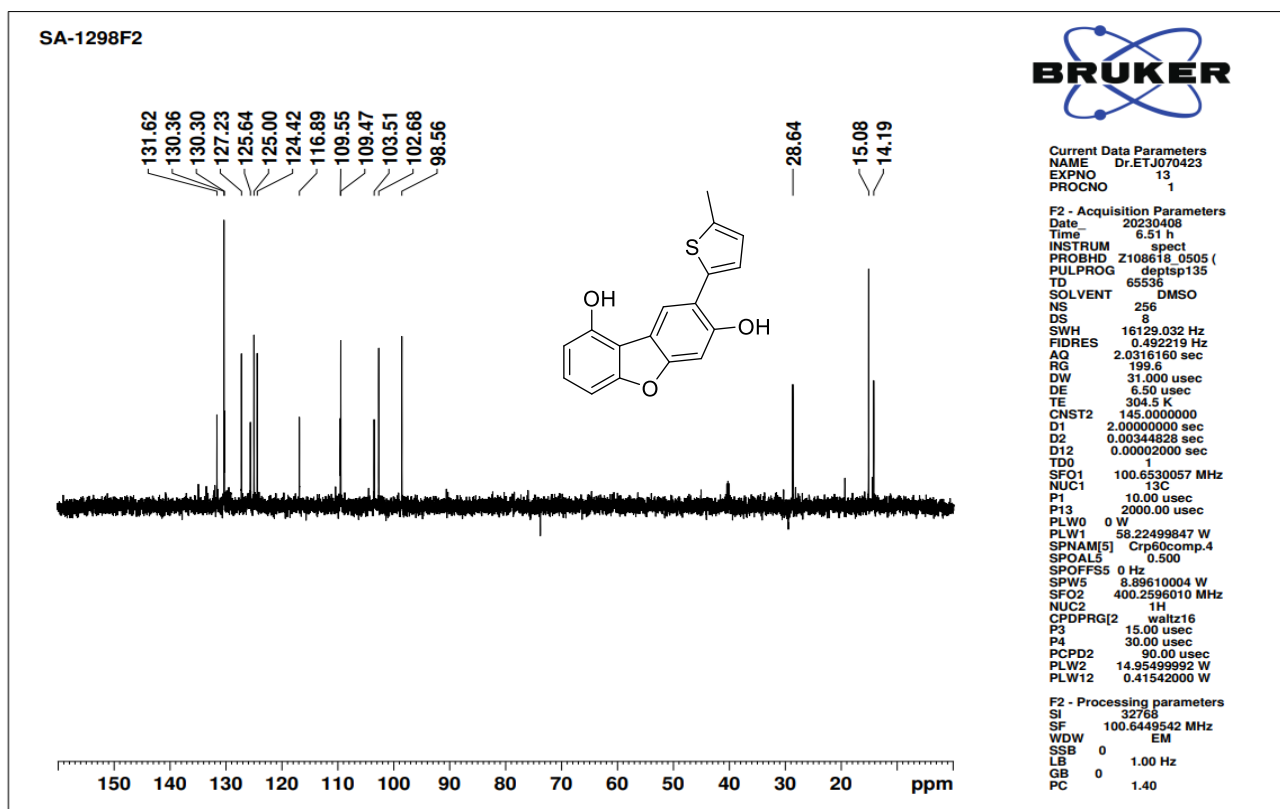

Figure 162: DEPT-135 NMR spectrum of compound 7h

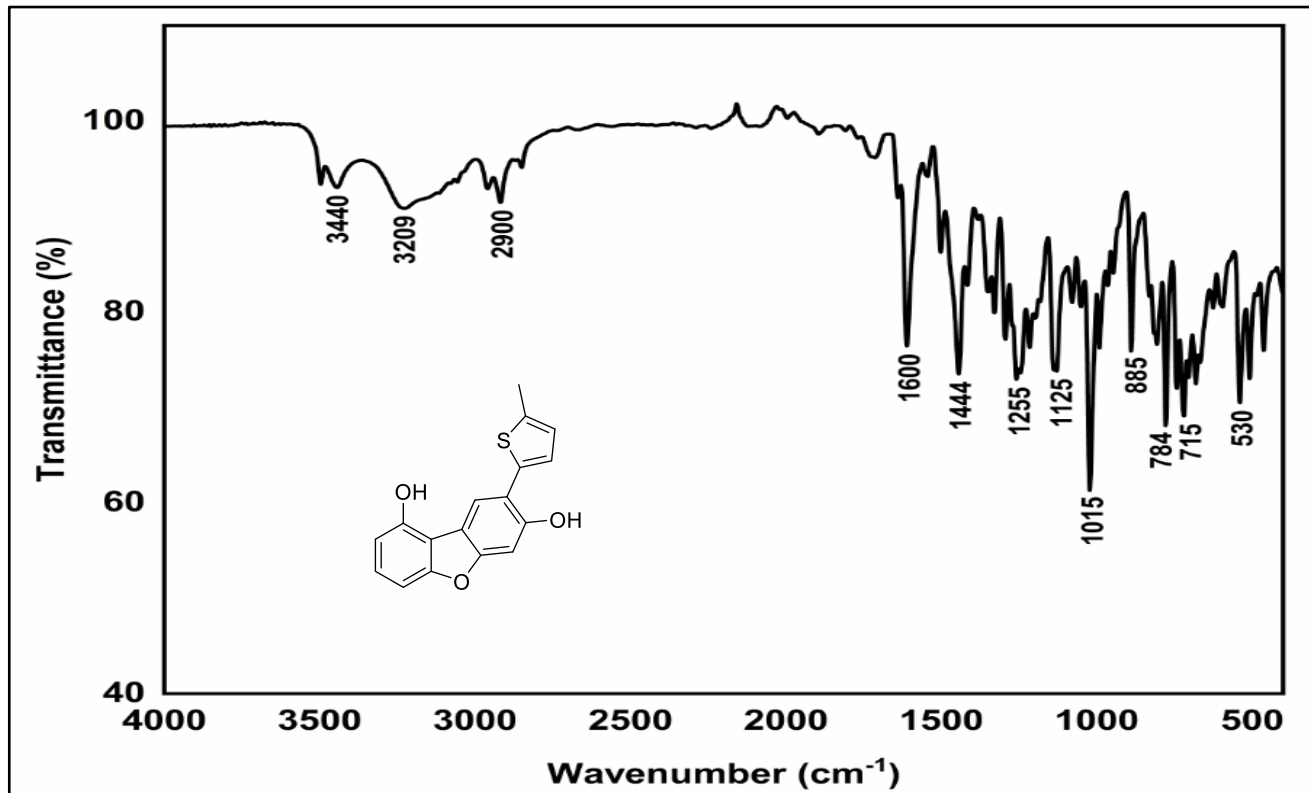

Figure 163: FT-IR spectrum of compound 7h

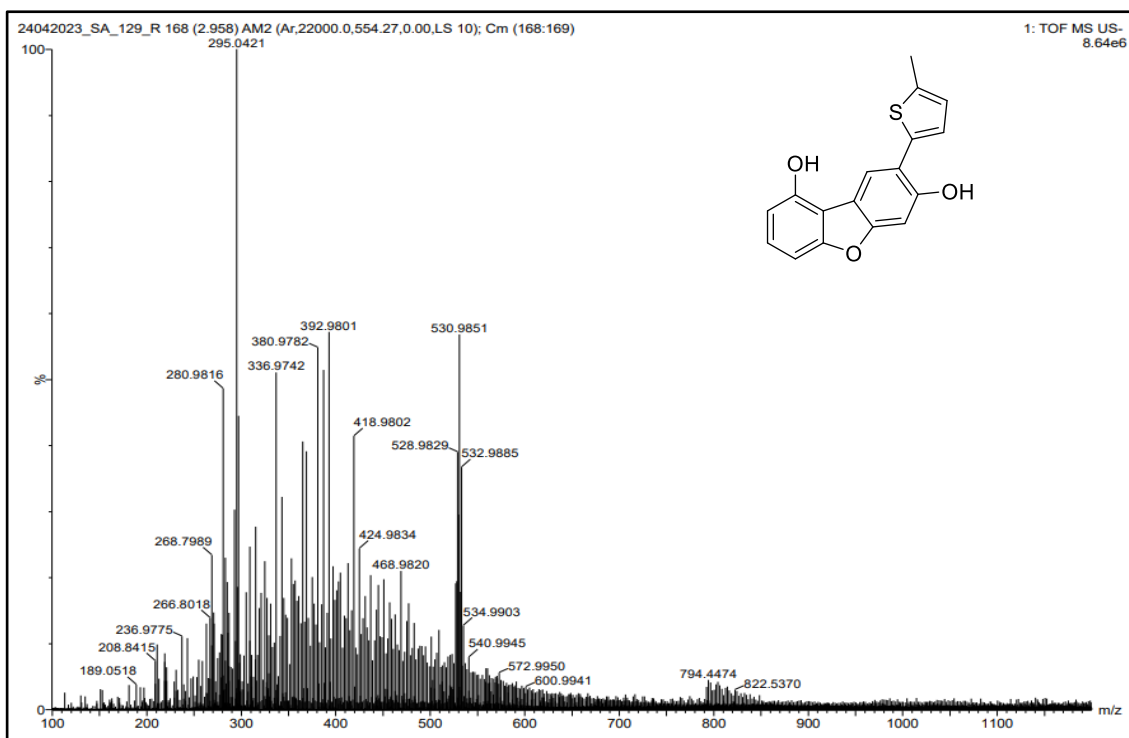

Figure 164: HRMS spectrum of compound 7h

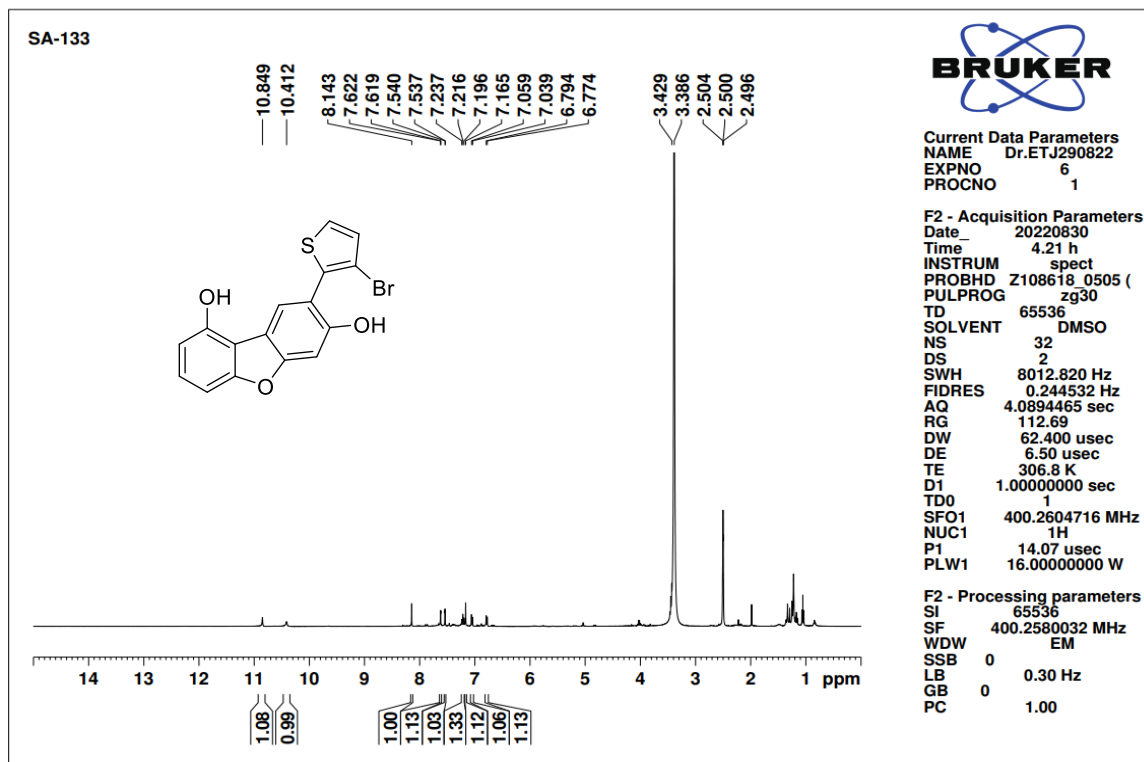Figure 165: <sup>1</sup>H NMR spectrum of compound 7i

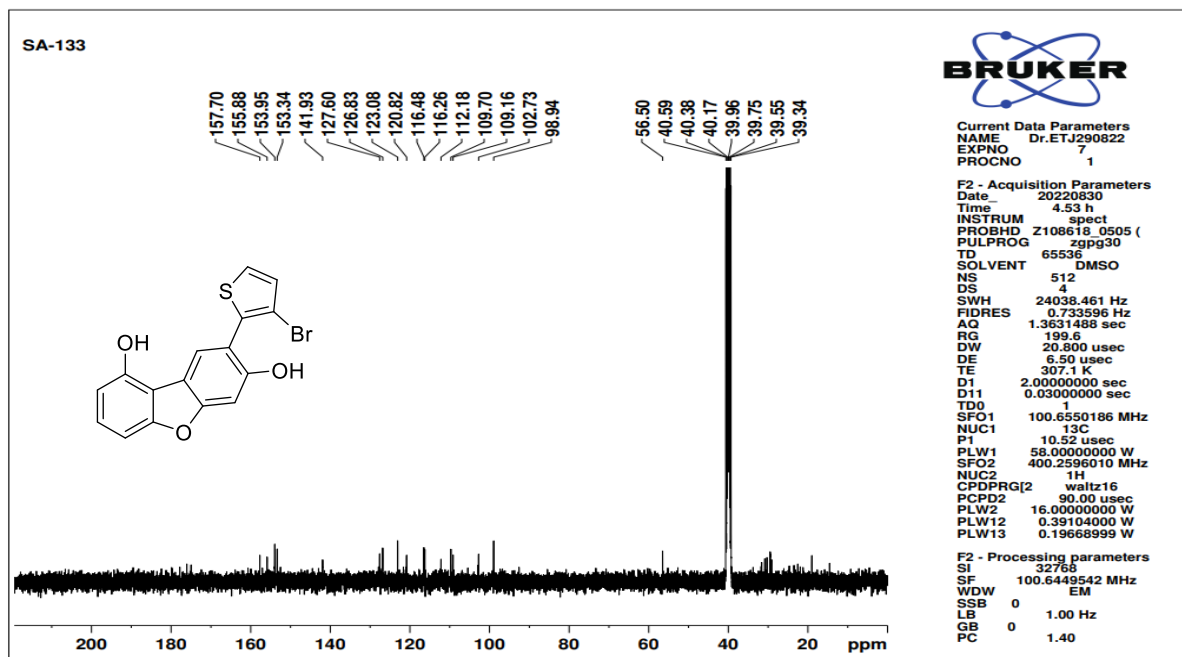Figure 166:  $^{13}\text{C}$  NMR spectrum of compound 7i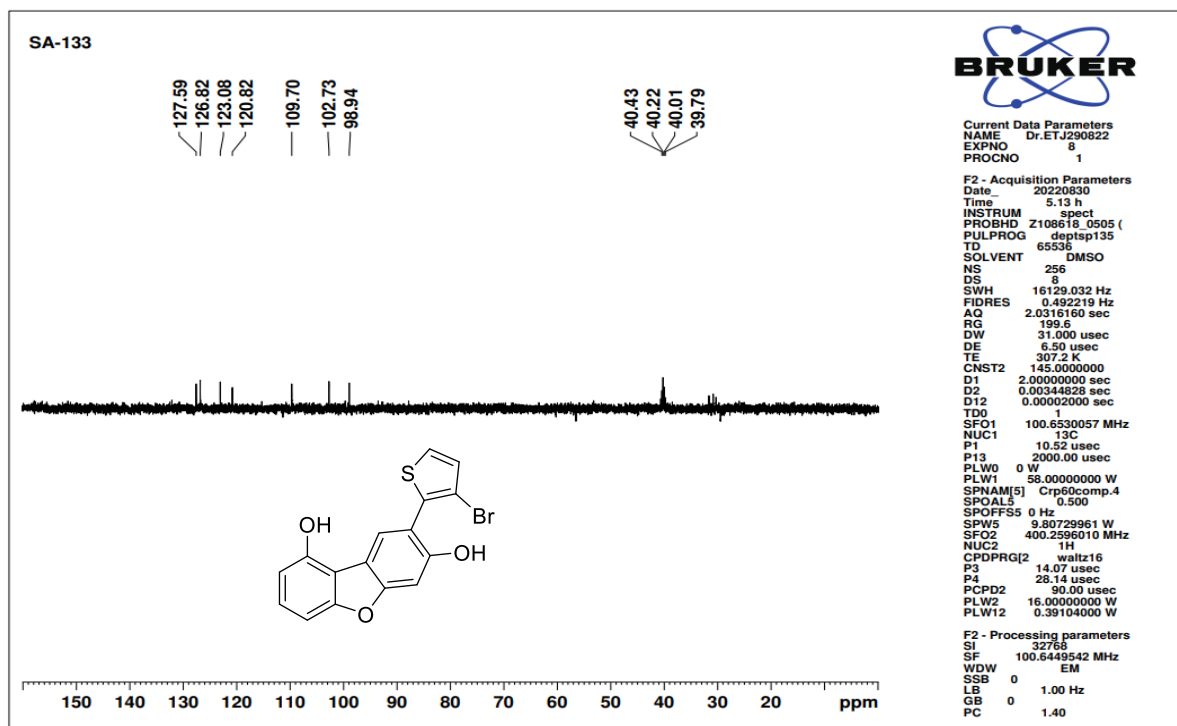

Figure 167: DEPT-135 NMR spectrum of compound 7i

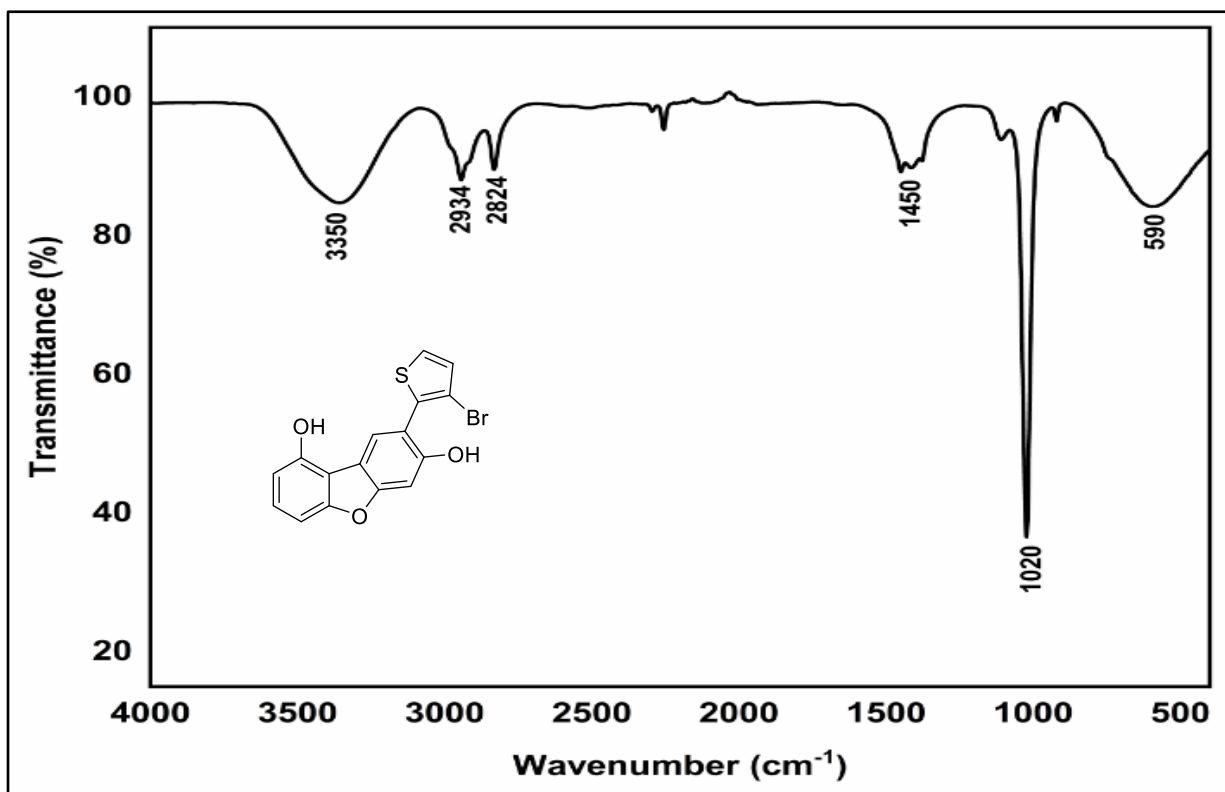

Figure 168: FT-IR spectrum of compound 7i

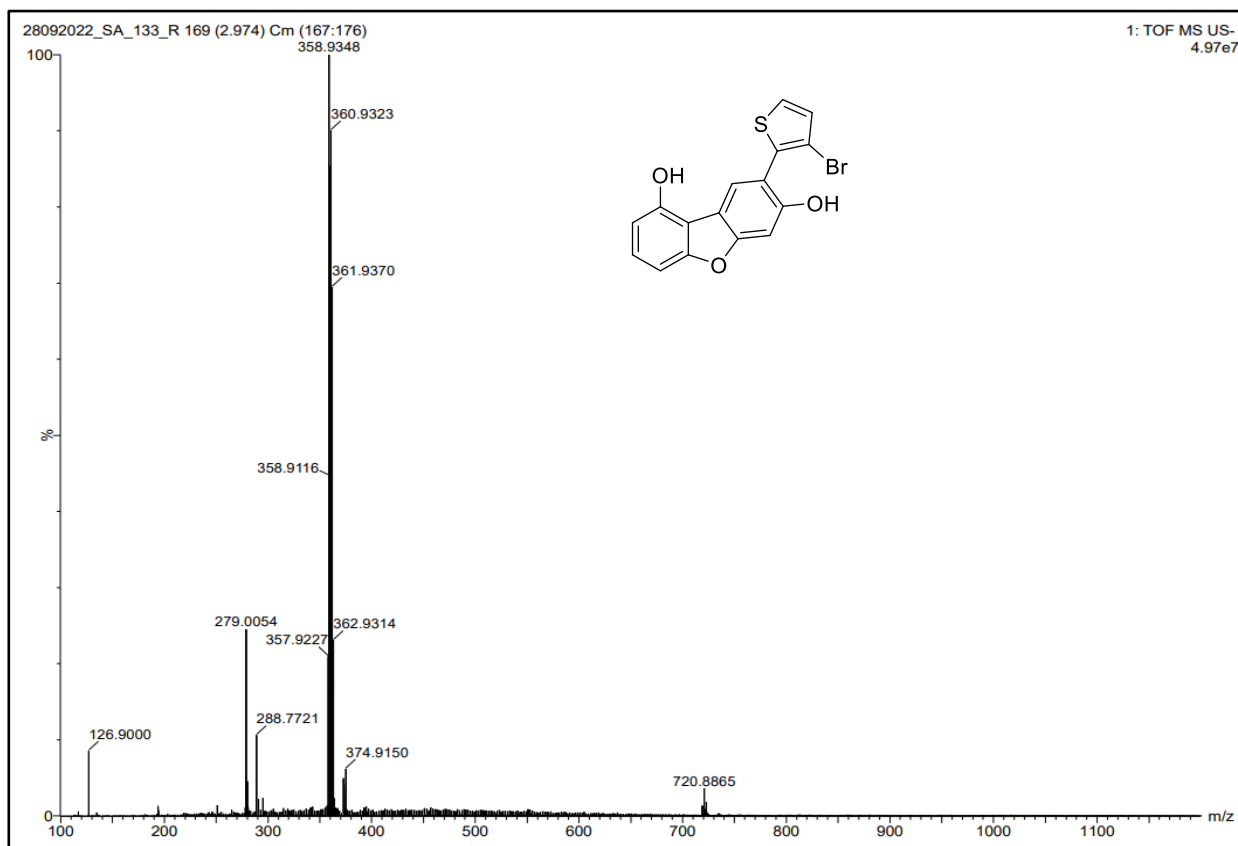

Figure 169: HRMS spectrum of compound 7i

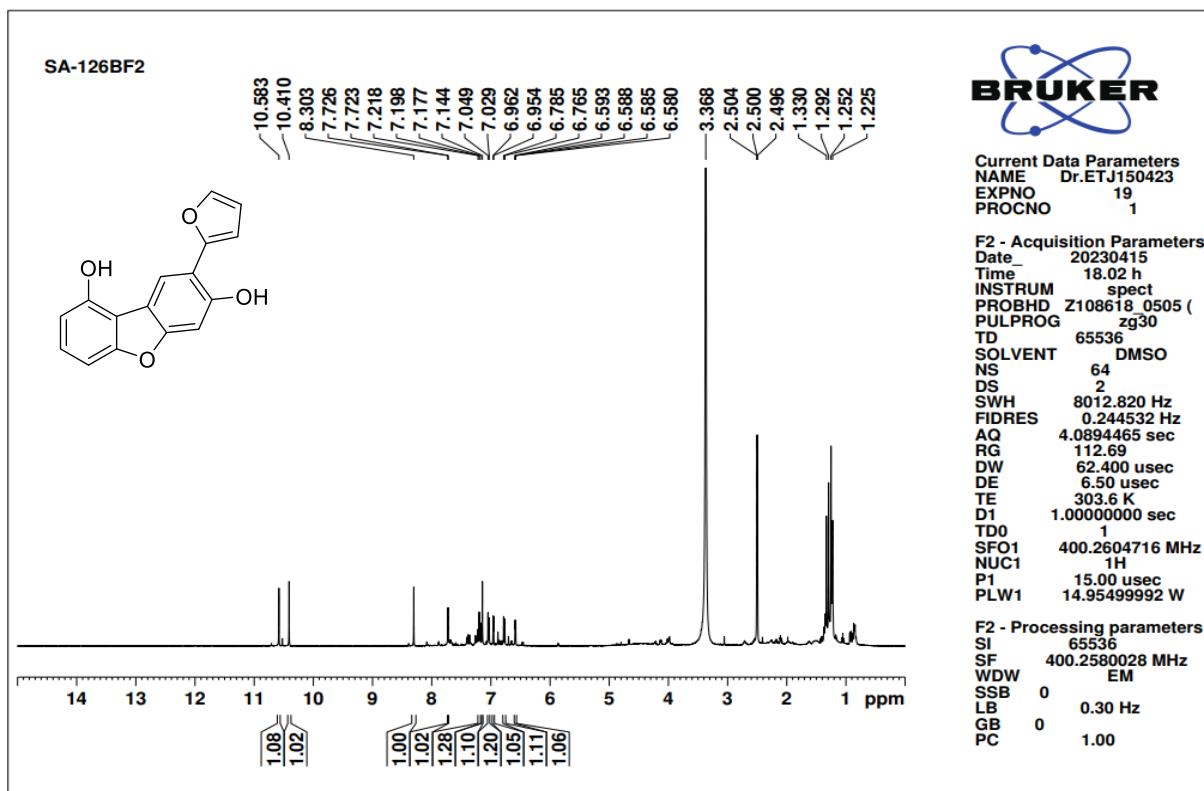Figure 170:  $^1\text{H}$  NMR spectrum of compound 7j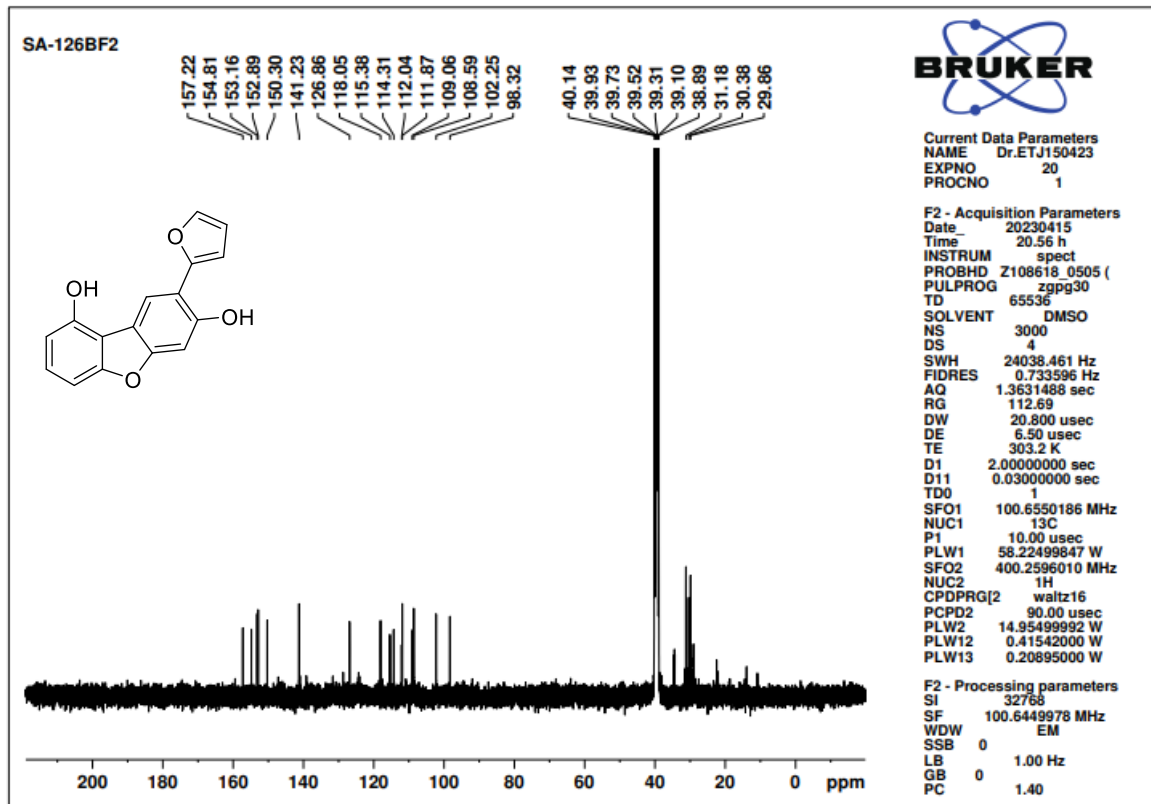Figure 171:  $^{13}\text{C}$  NMR spectrum of compound 7j

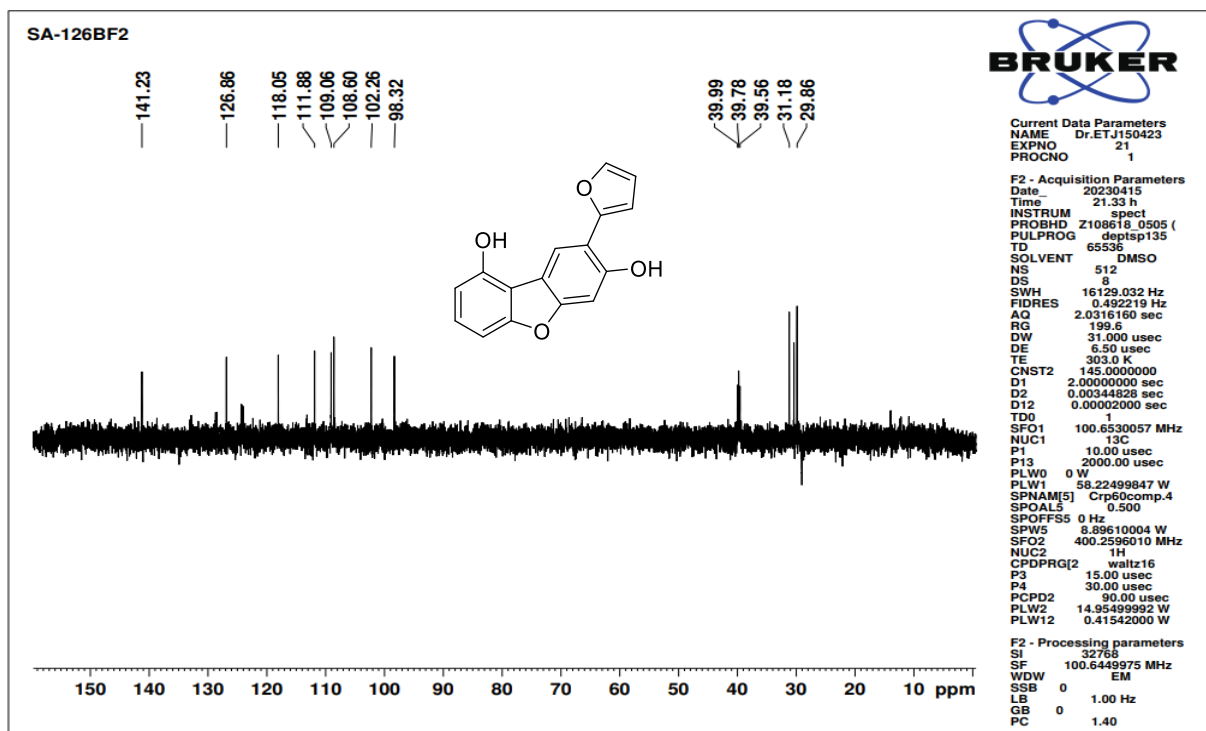

Figure 172: DEPT-135 NMR spectrum of compound 7j

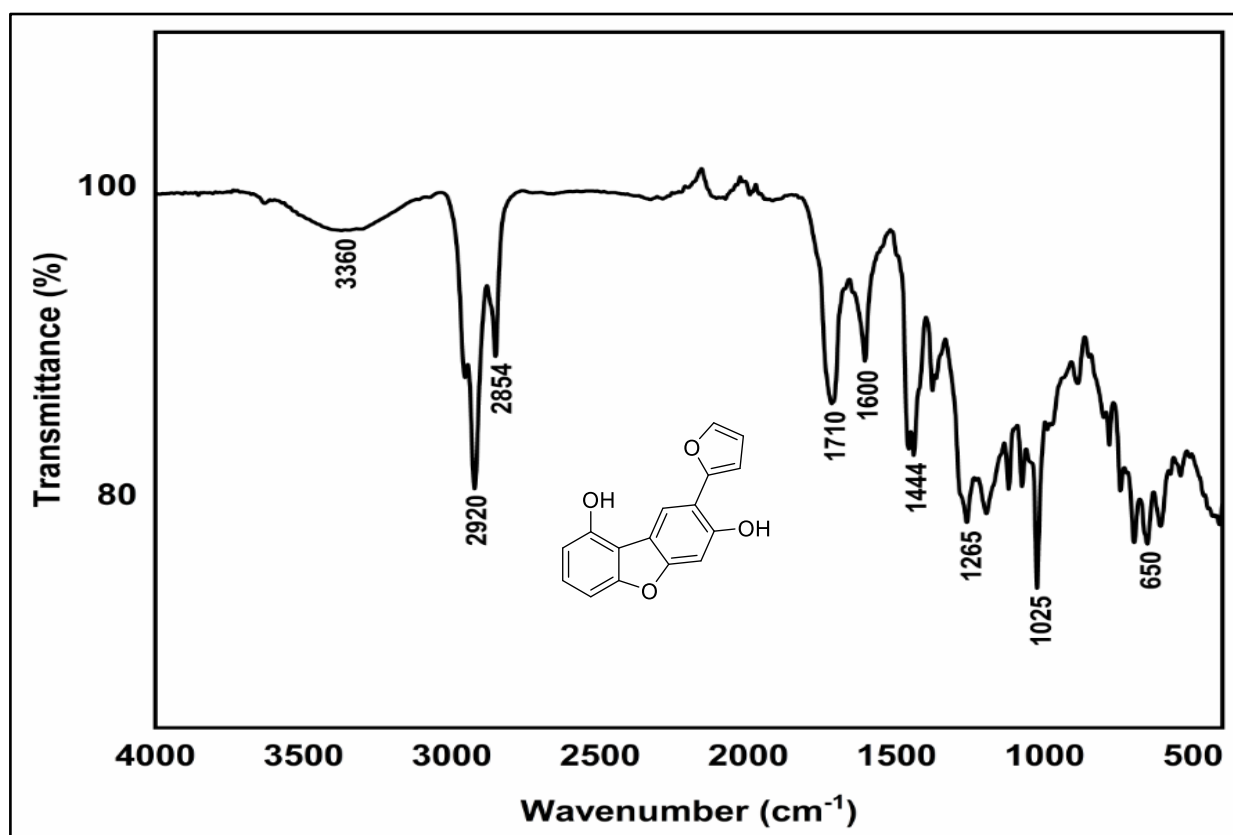

Figure 173: FT-IR spectrum of compound 7j



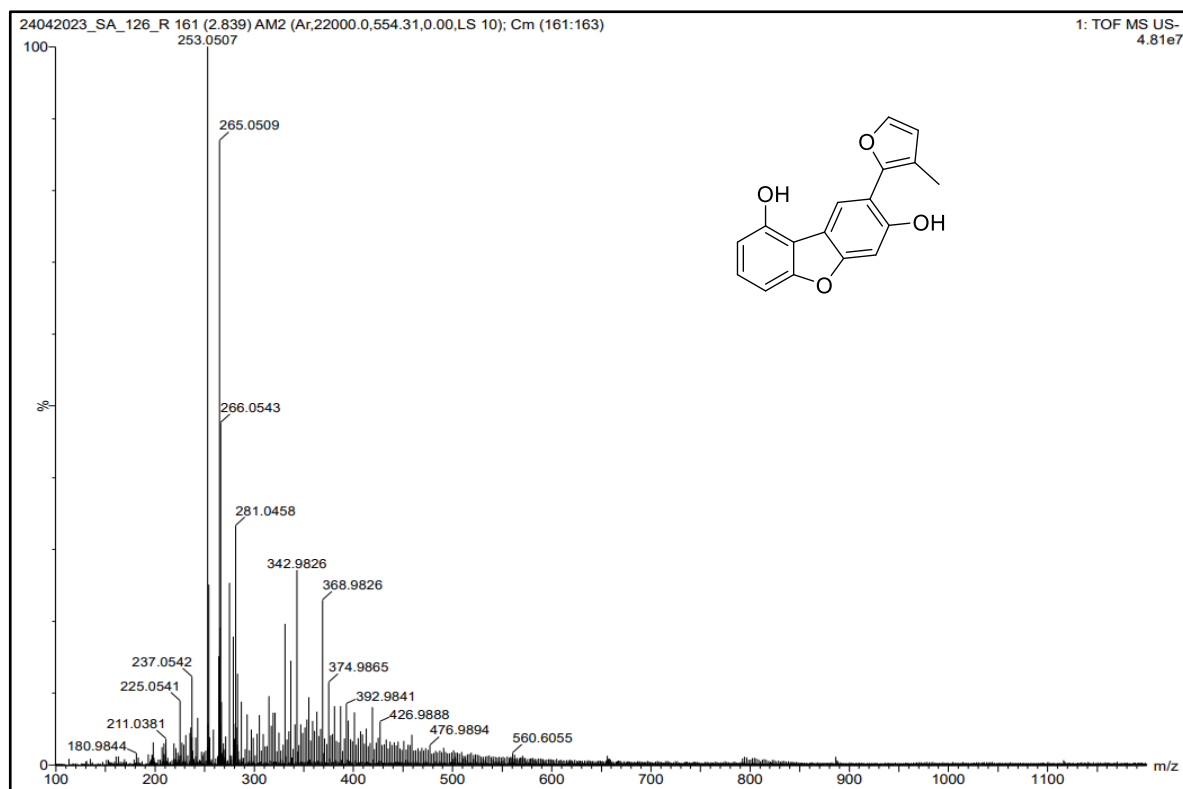

Figure 174: HRMS spectrum of compound 7j

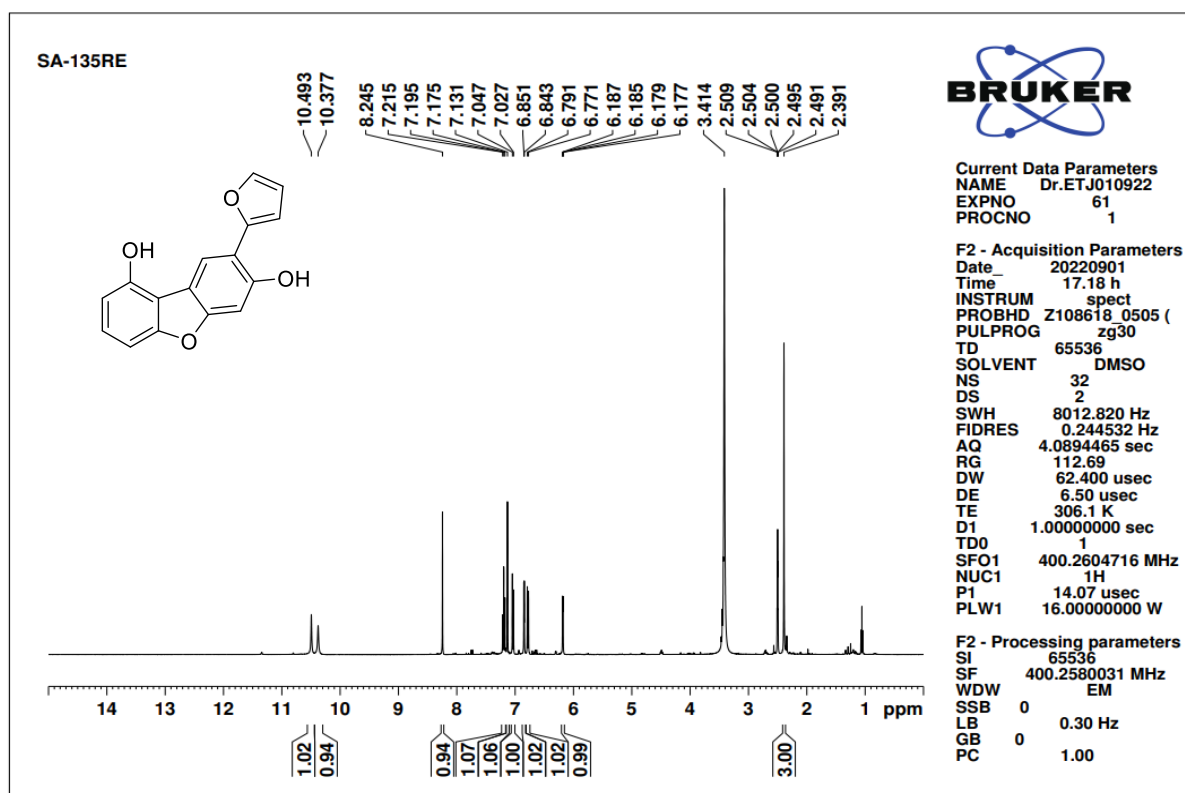Figure 175: <sup>1</sup>H NMR spectrum of compound 7k

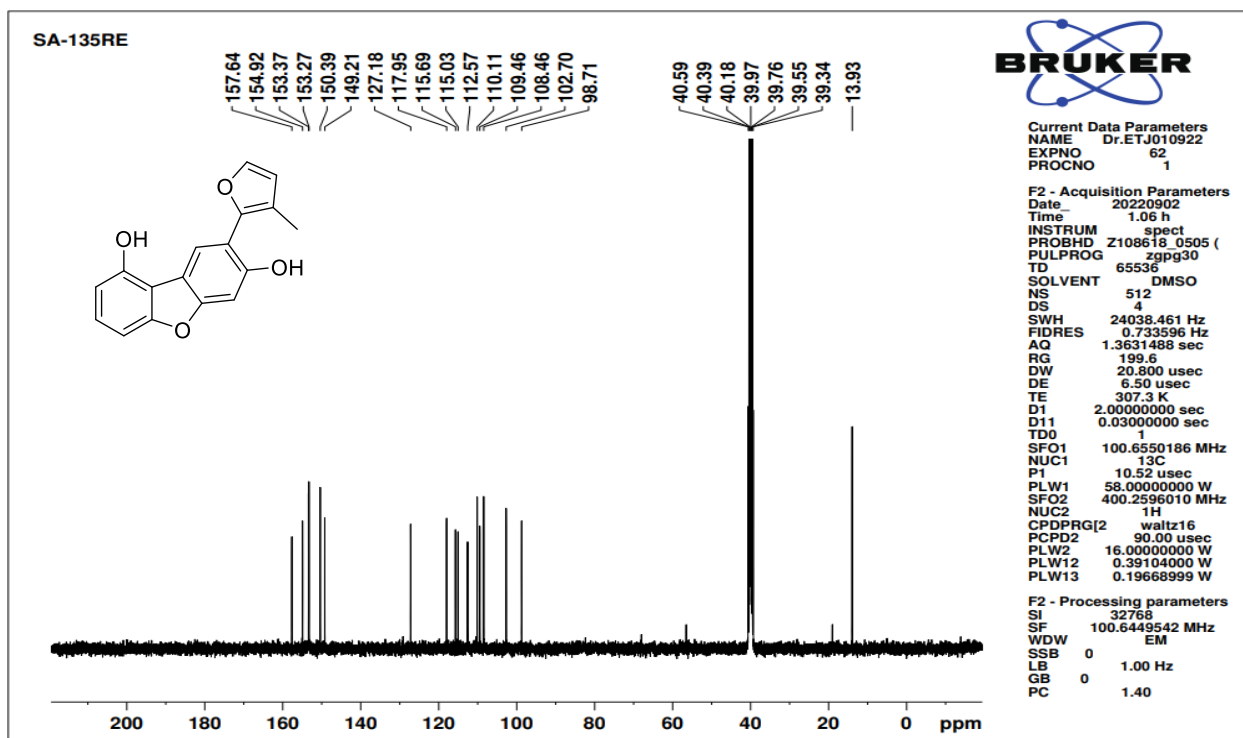Figure 176:  $^{13}\text{C}$  NMR spectrum of compound 7k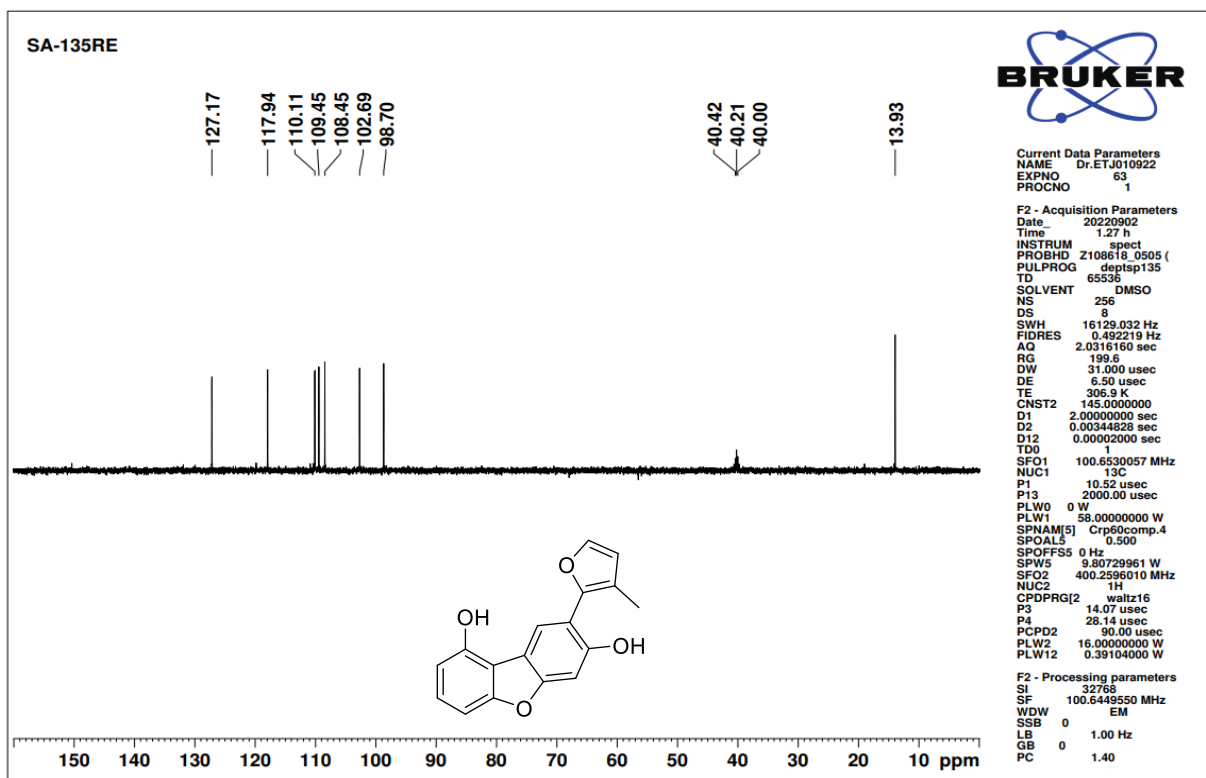

Figure 177: DEPT-135 NMR spectrum of compound 7k

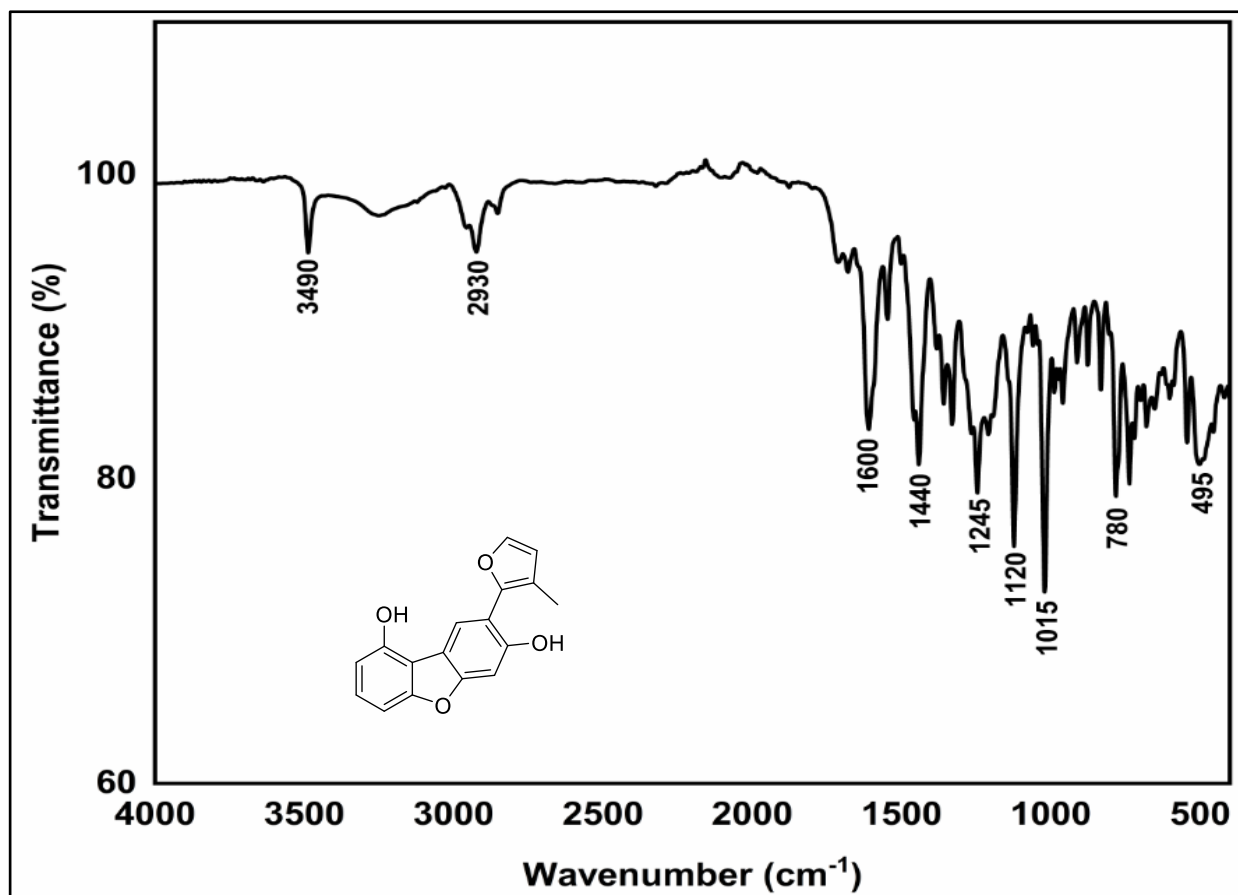

Figure 178: FT-IR spectrum of compound 7k

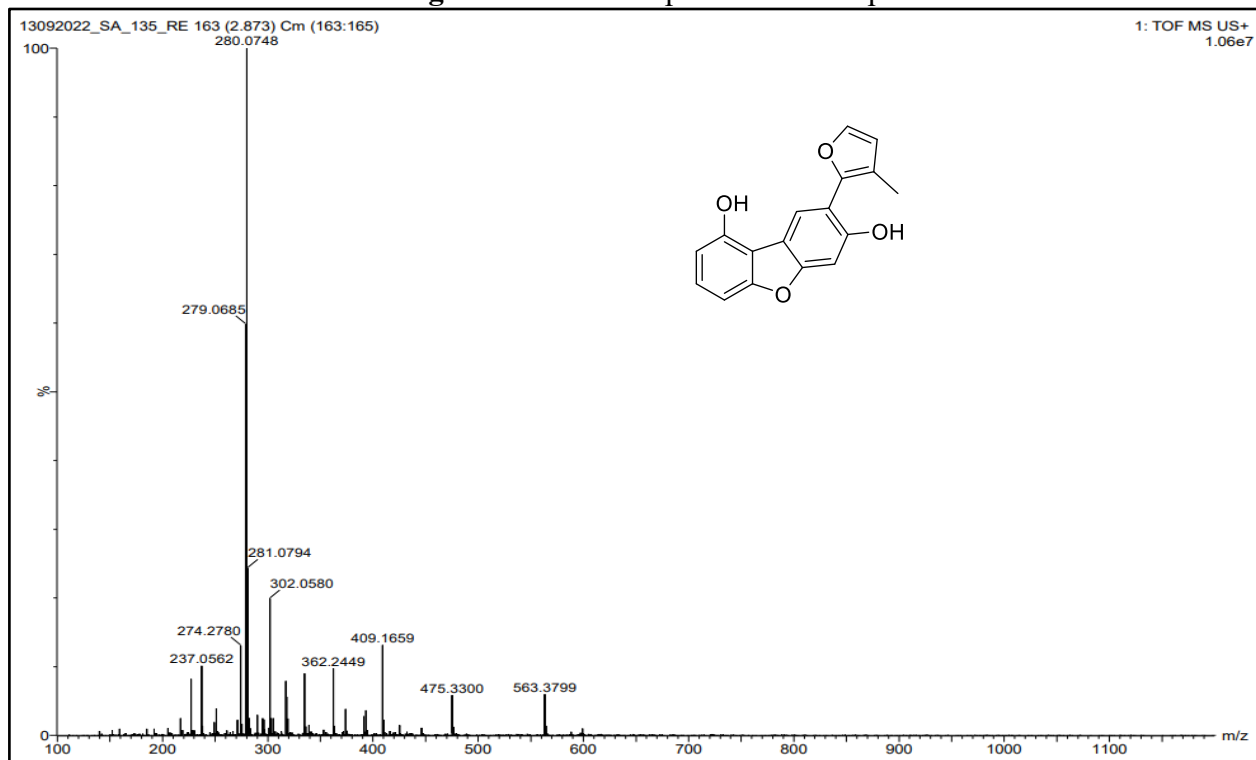

Figure 179: HRMS spectrum of compound 7k

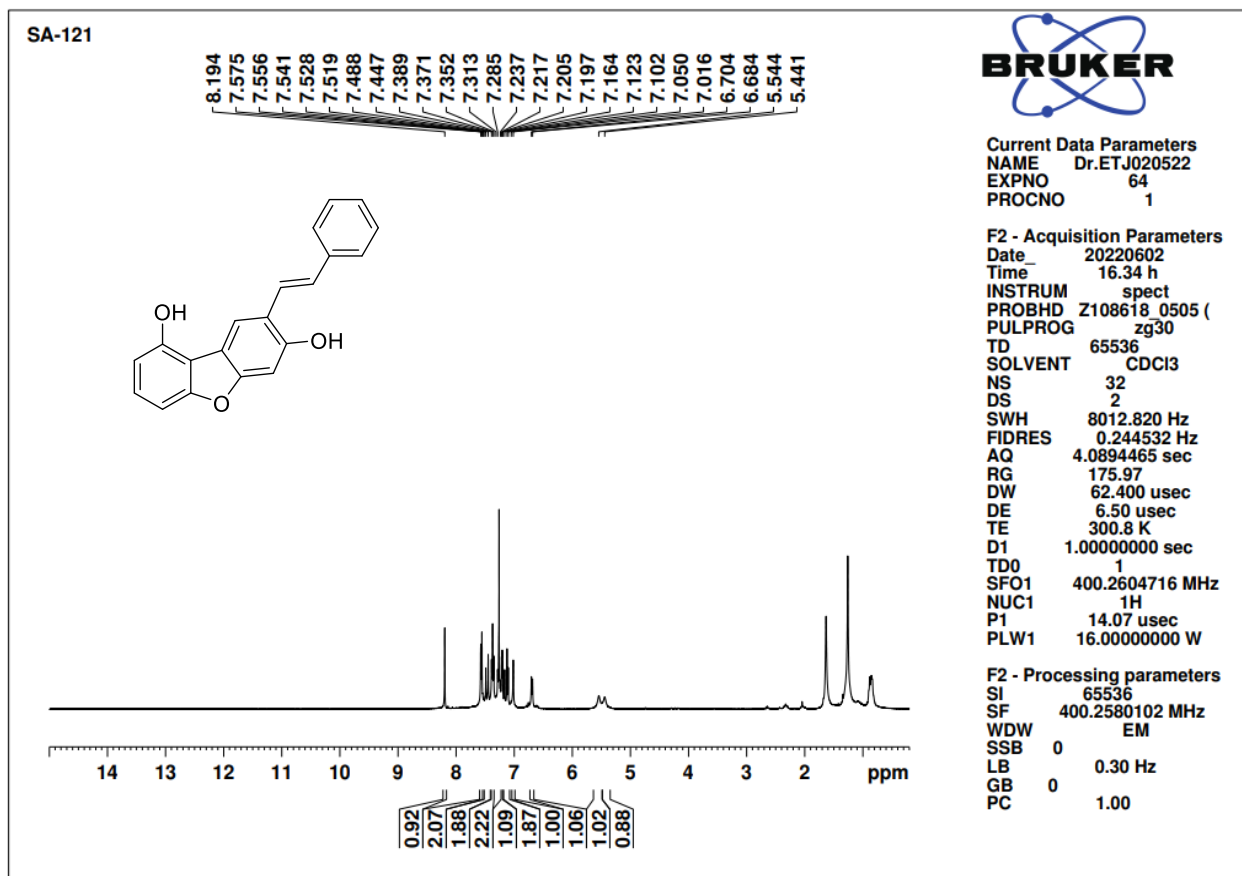Figure 180:  $^1\text{H}$  NMR spectrum of compound 71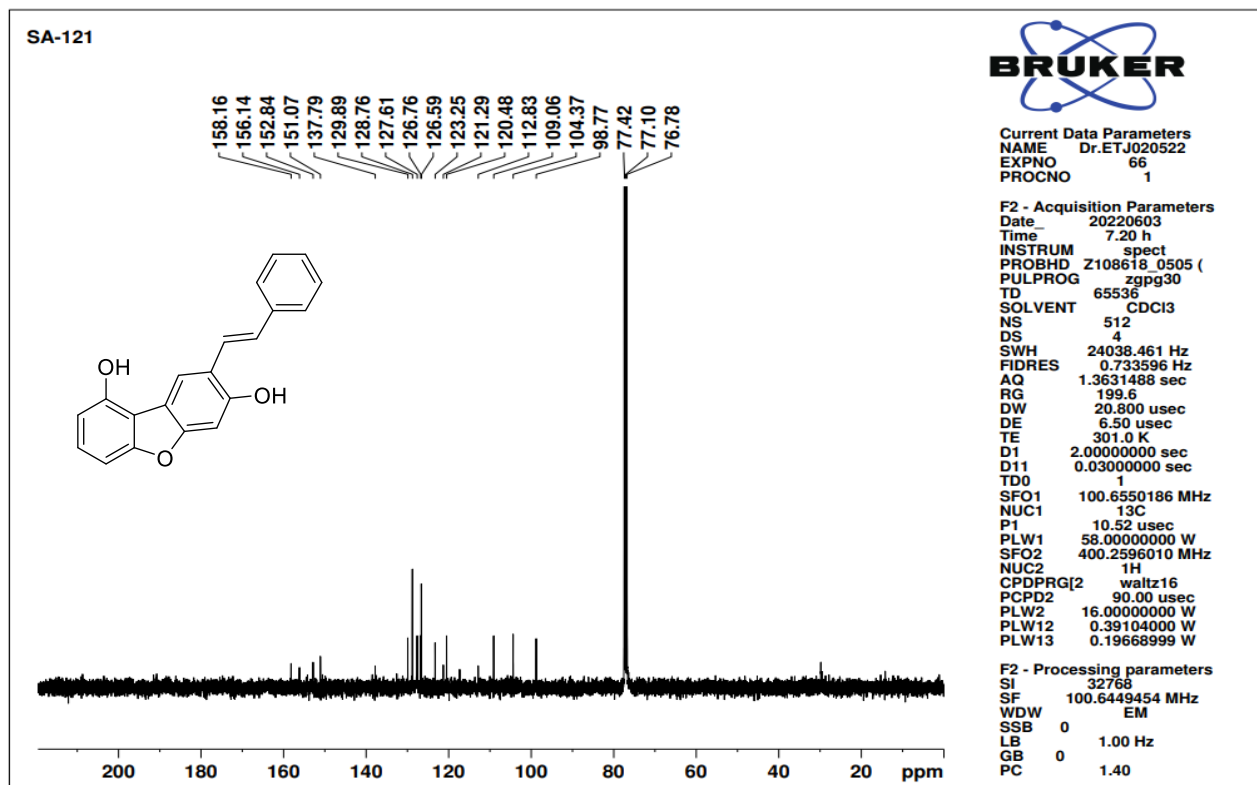Figure 181:  $^{13}\text{C}$  NMR spectrum of compound 71

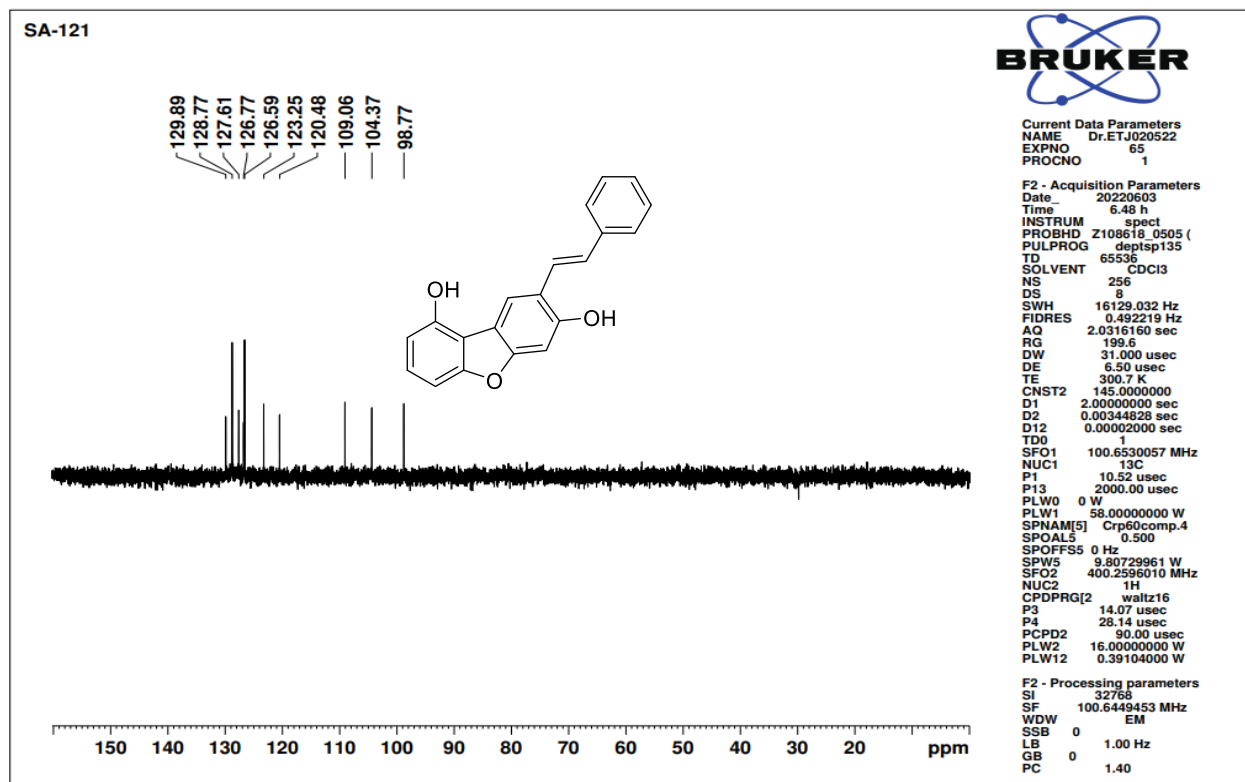

Figure 182: DEPT-135 NMR spectrum of compound 71

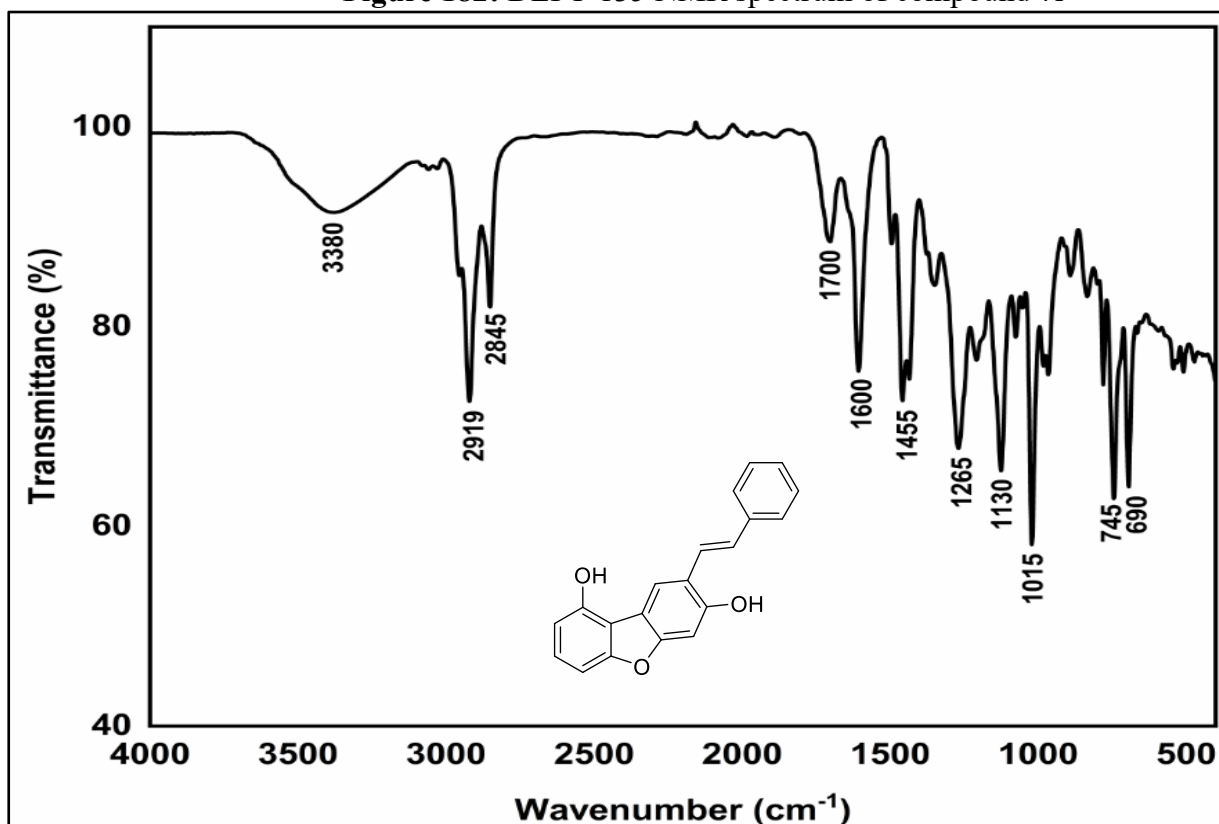

Figure 183: FT-IR spectrum of compound 71

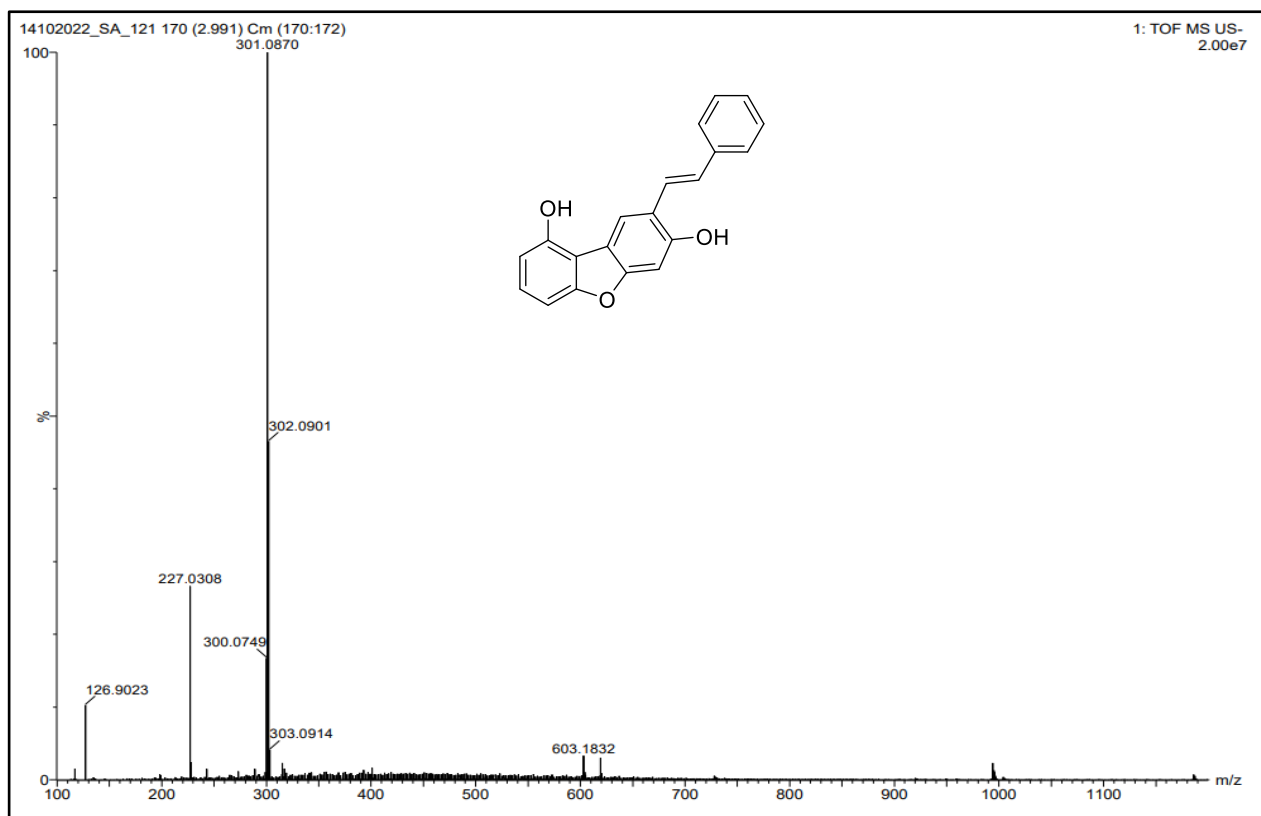

Figure 184: HRMS spectrum of compound 7I

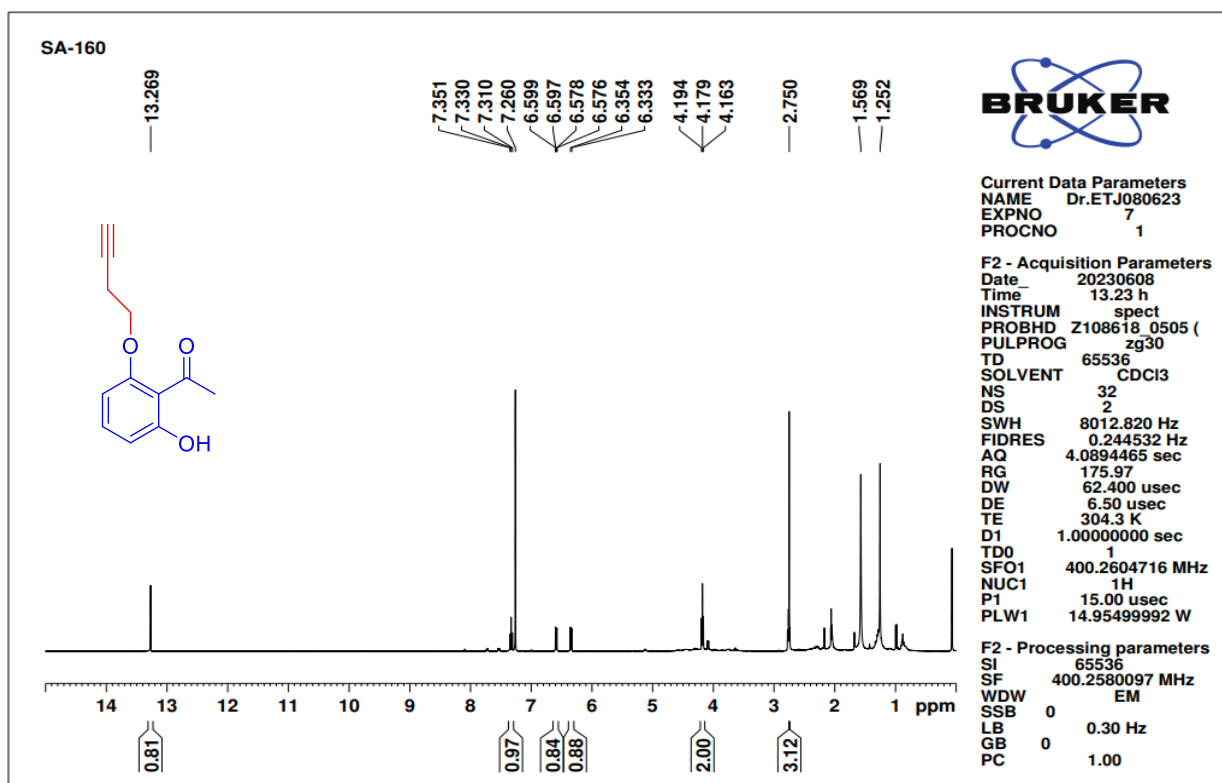Figure 185:  $^1\text{H}$  NMR spectrum of compound 14

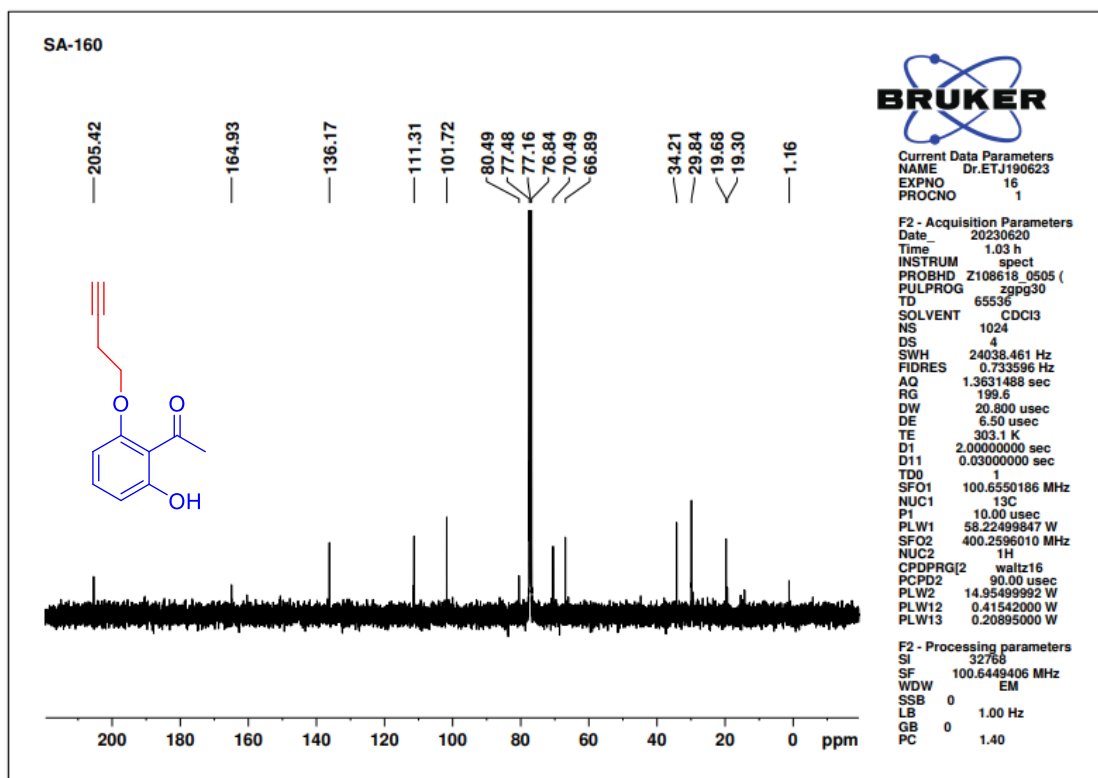Figure 186:  $^{13}\text{C}$  NMR spectrum of compound 14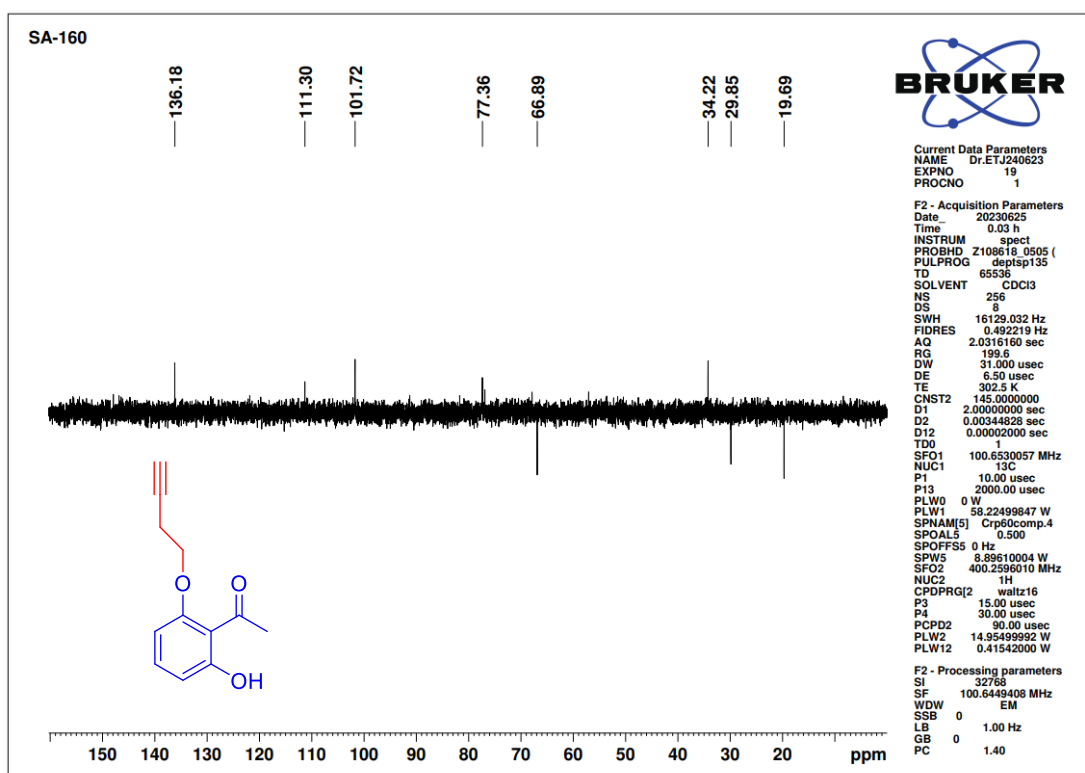

Figure 187: DEPT-135 NMR spectrum of compound 14

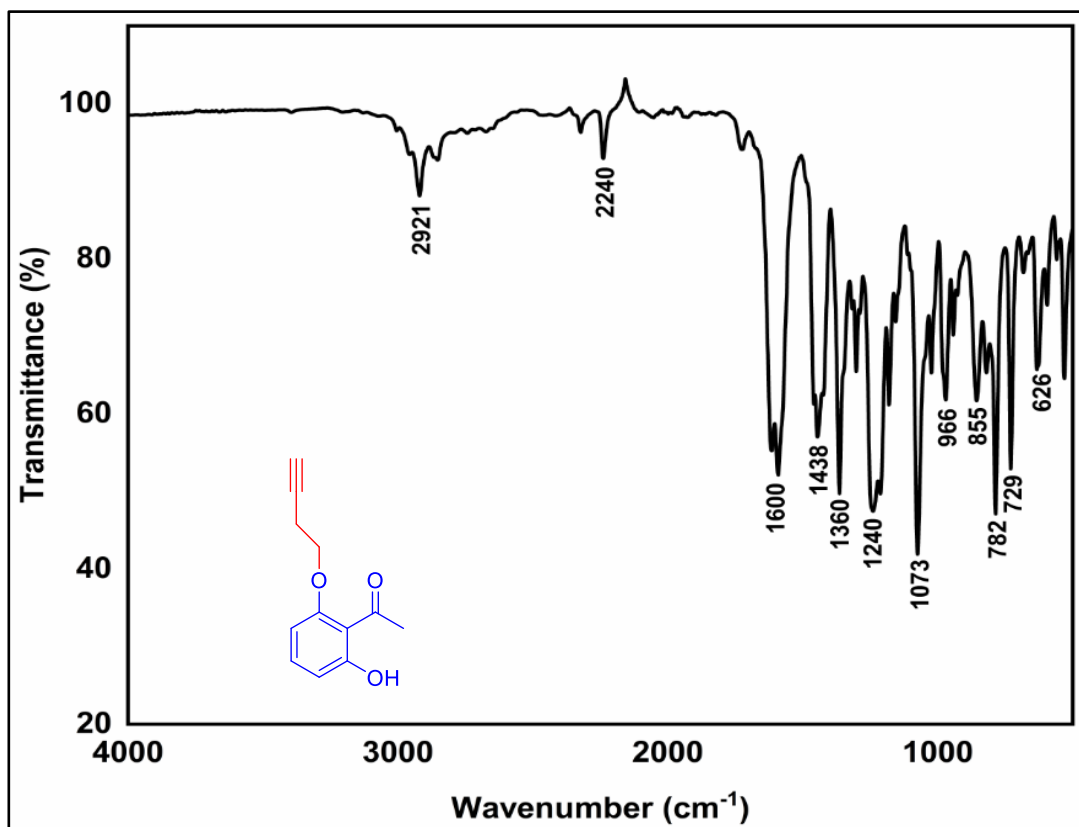

Figure 188: FT-IR spectrum of compound 14

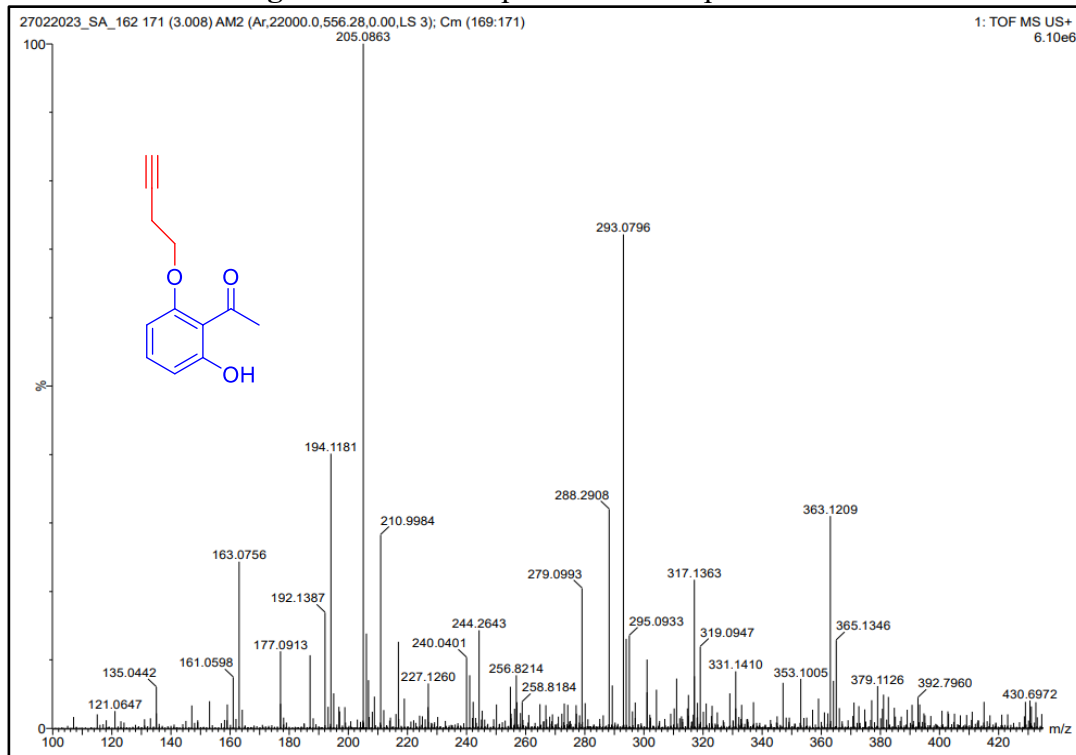

Figure 189: HRMS spectrum of compound 14



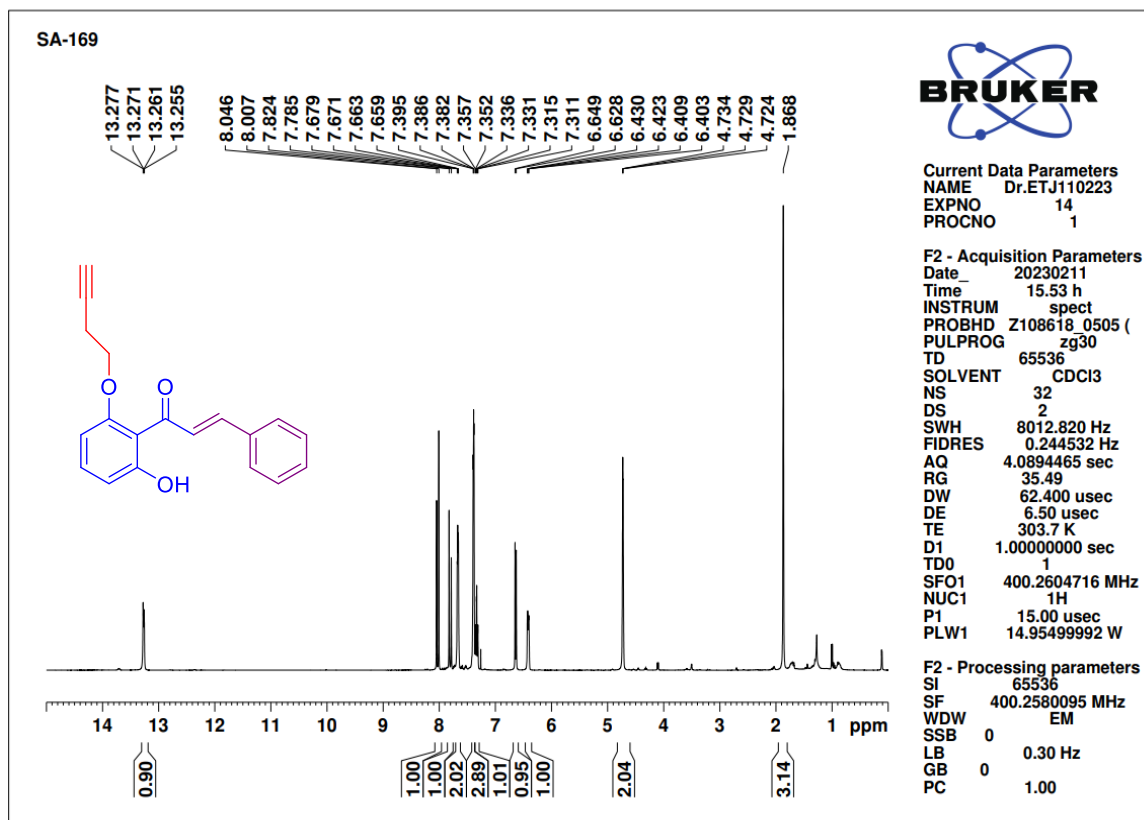Figure 190:  $^1\text{H}$  NMR spectrum of compound 14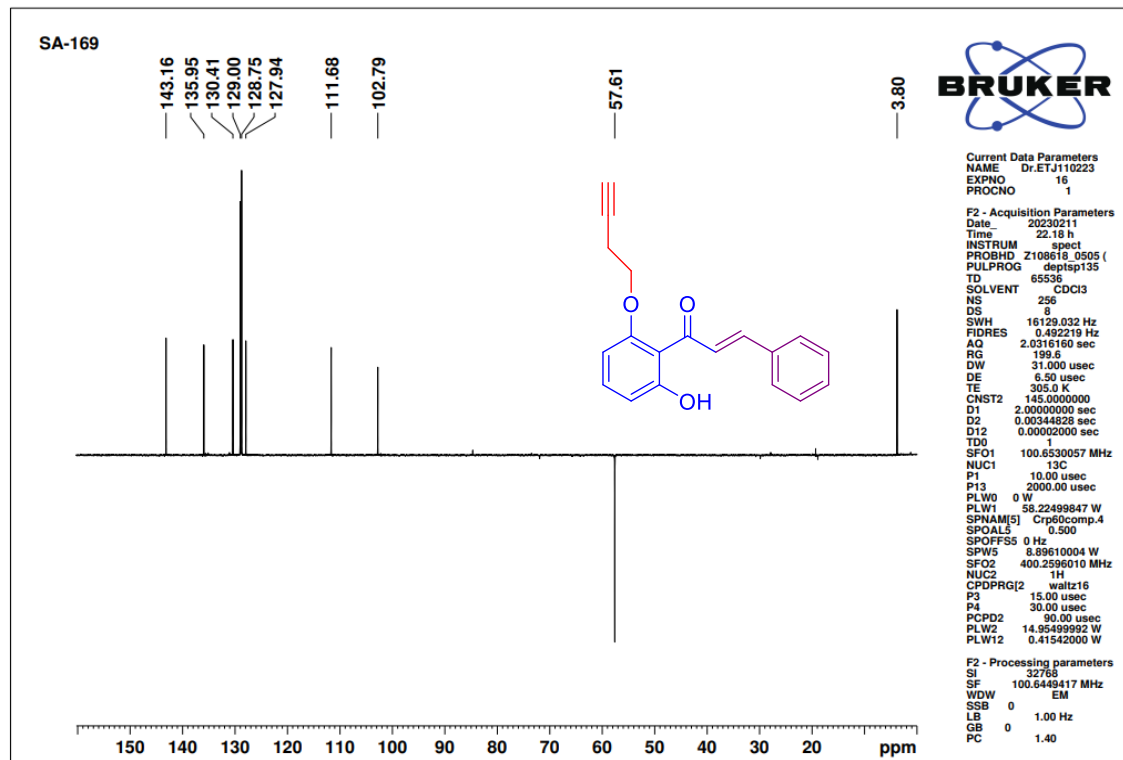Figure 191:  $^{13}\text{C}$  NMR spectrum of compound 14

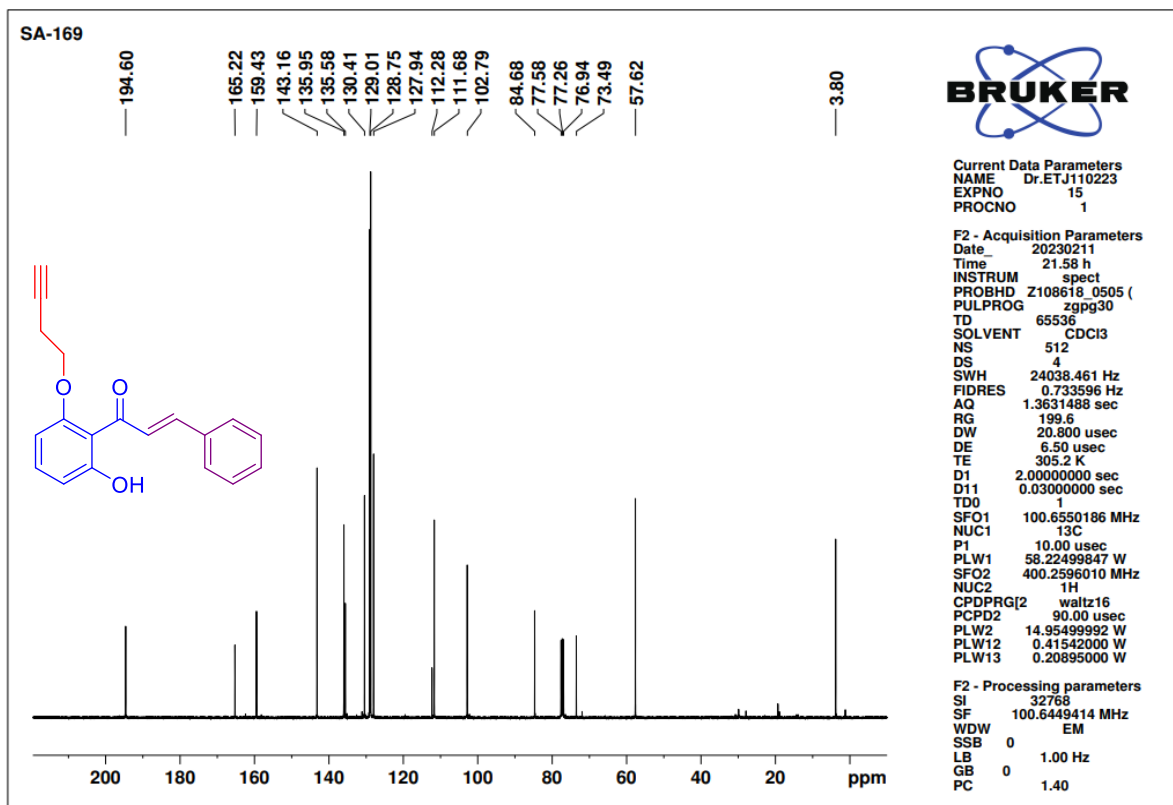

Figure 192: DEPT-135 NMR spectrum of compound 14

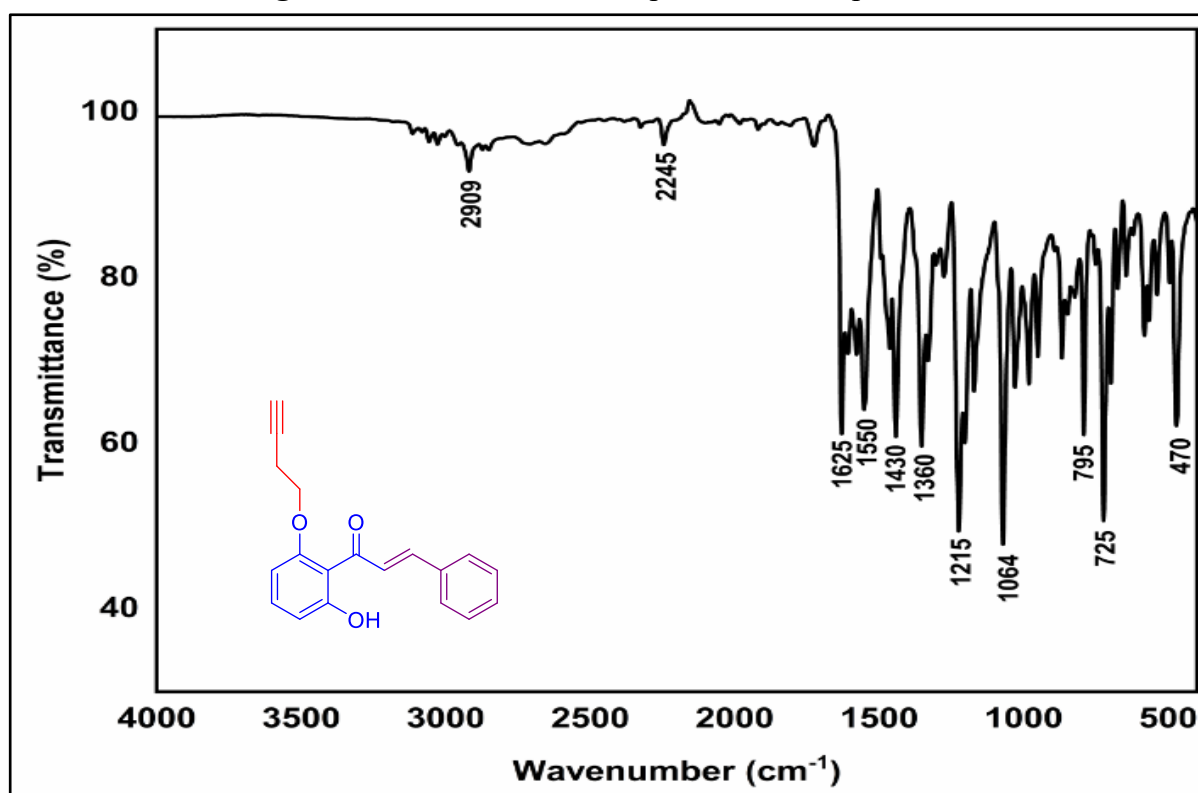

Figure 193: FT-IR spectrum of compound 14

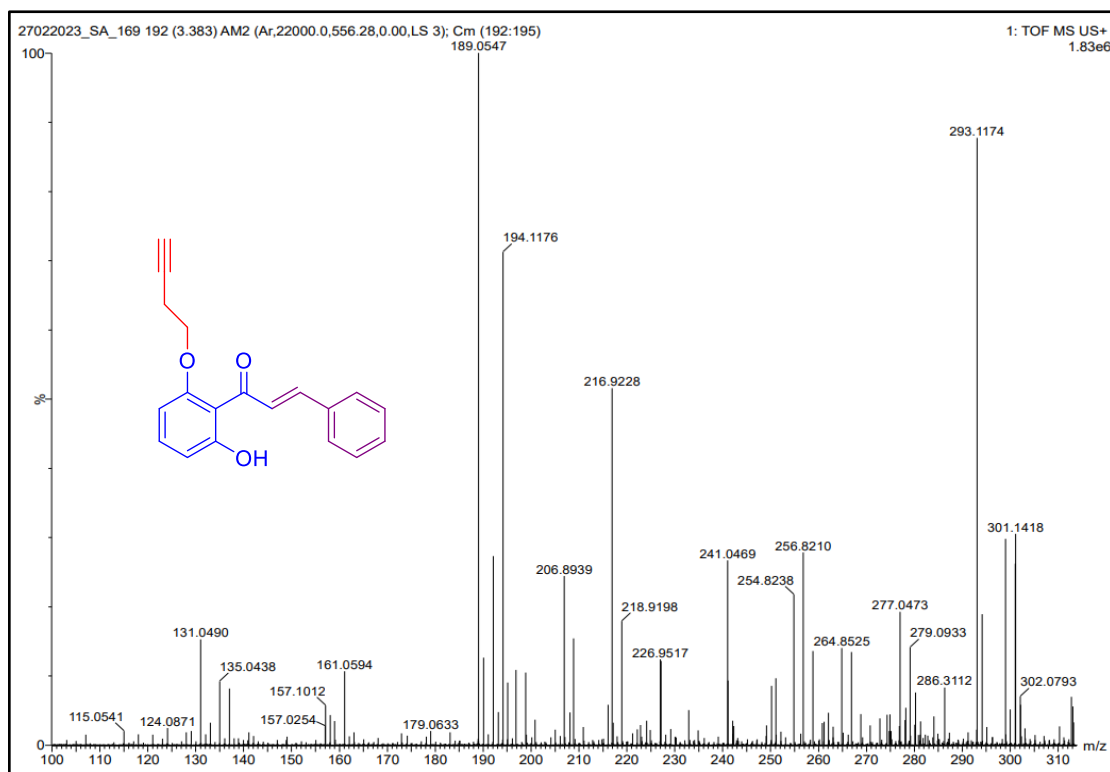

Figure 194: FT-IR spectrum of compound 14

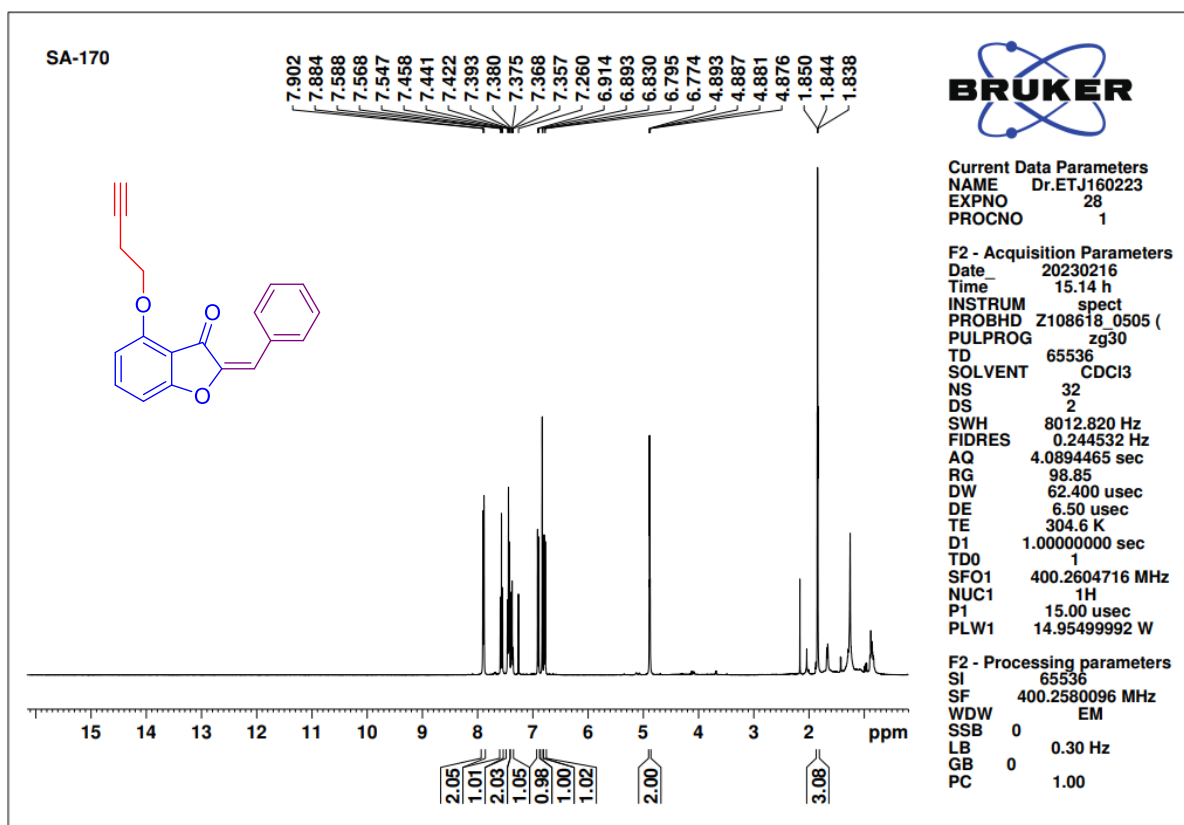Figure 195: <sup>1</sup>H-NMR spectrum of compound 15

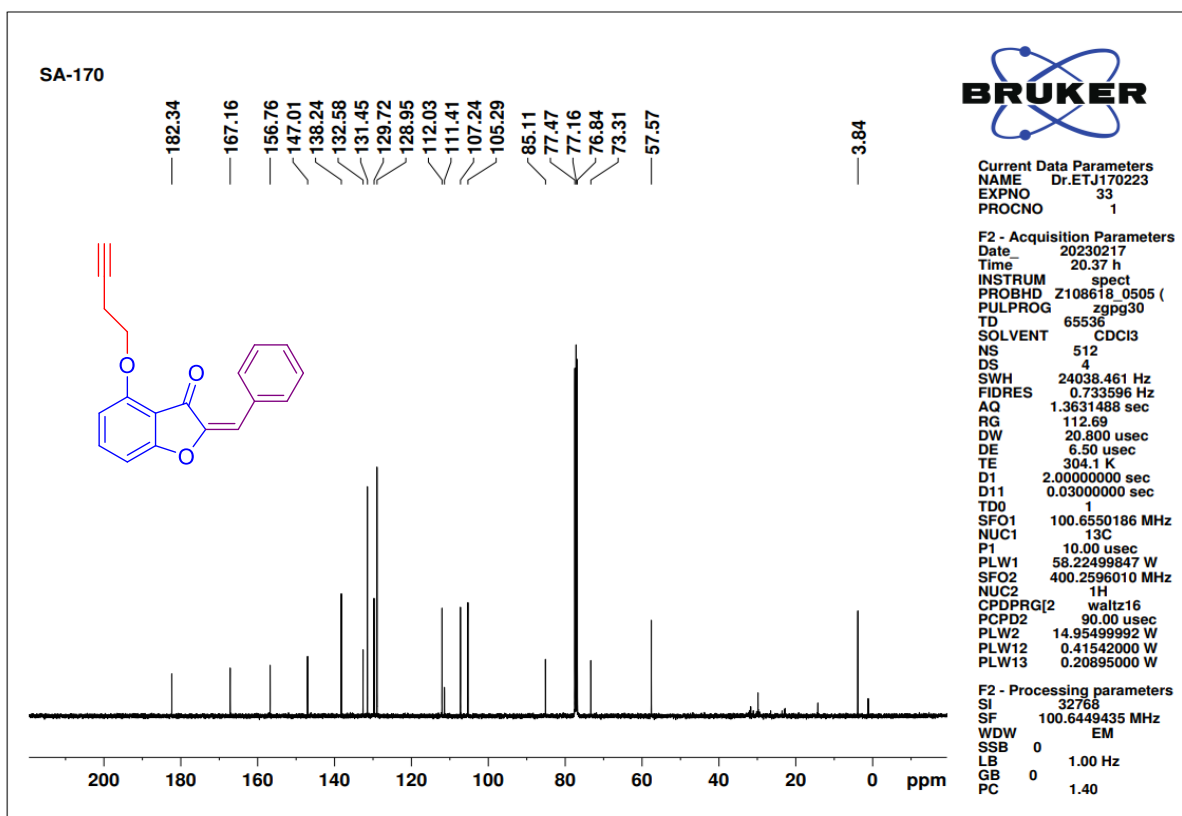Figure 196:  $^{13}\text{C}$ -NMR spectrum of compound 15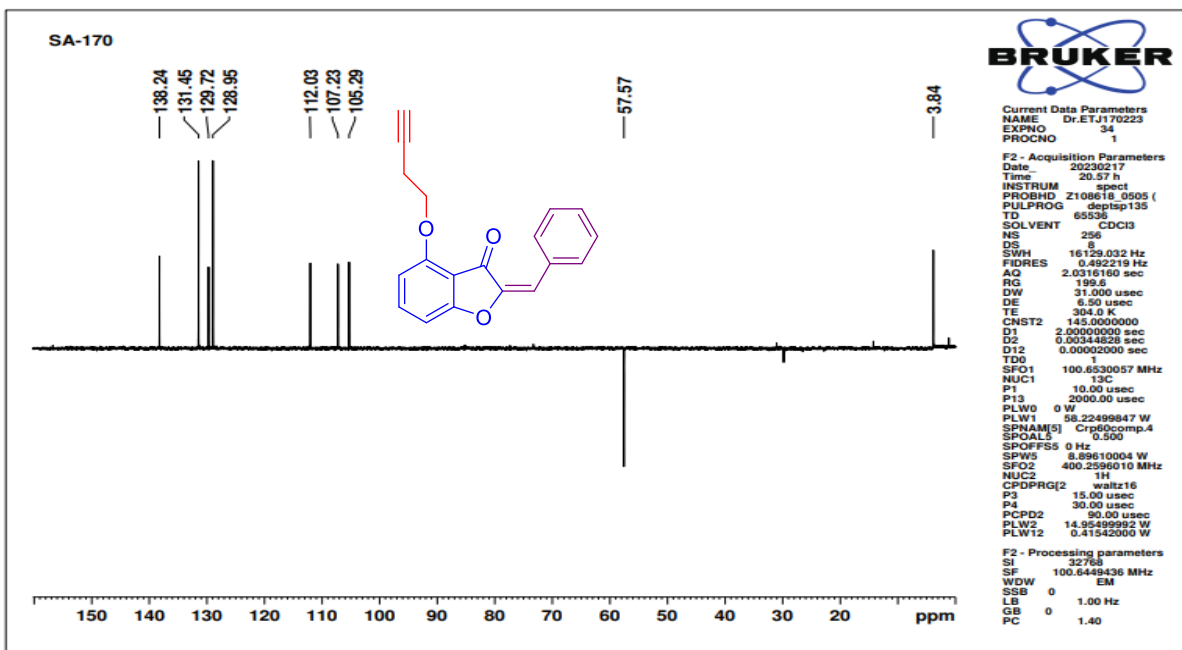

Figure 197: DEPT-135 NMR spectrum of compound 15

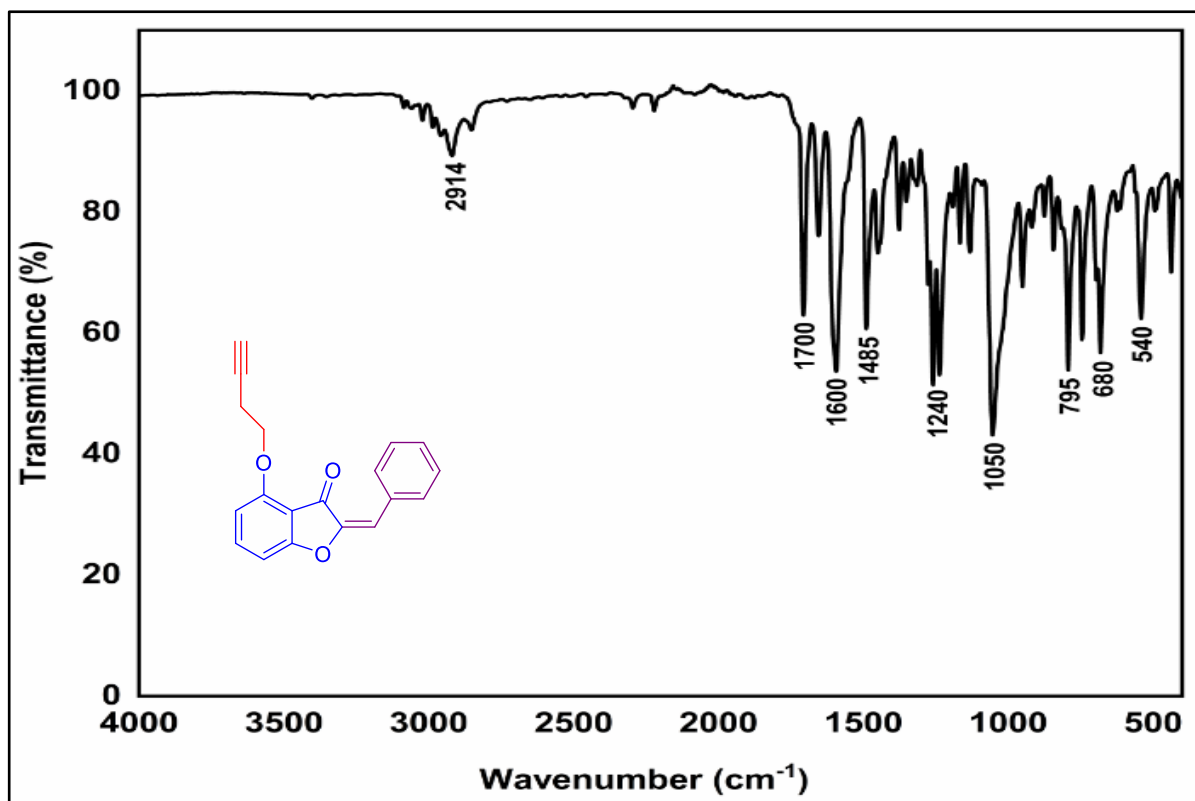

Figure 198: FT-IR spectrum of compound 15

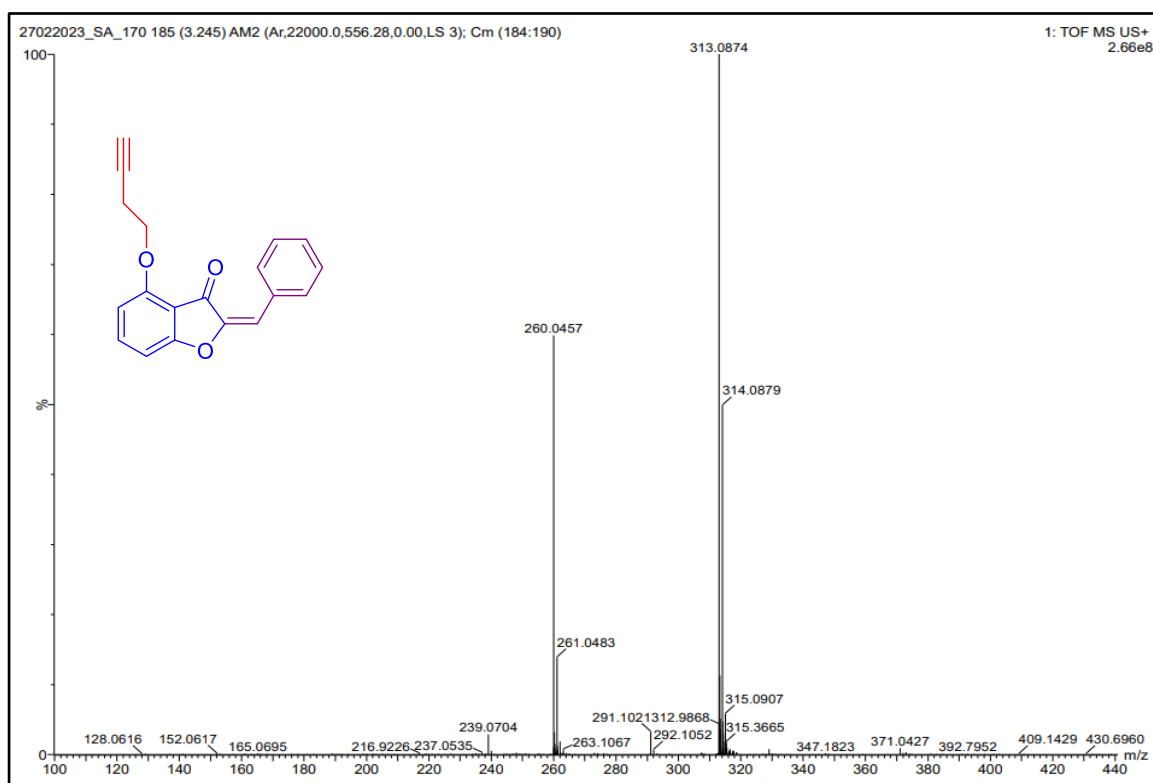

Figure 199: HRMS spectrum of compound 15

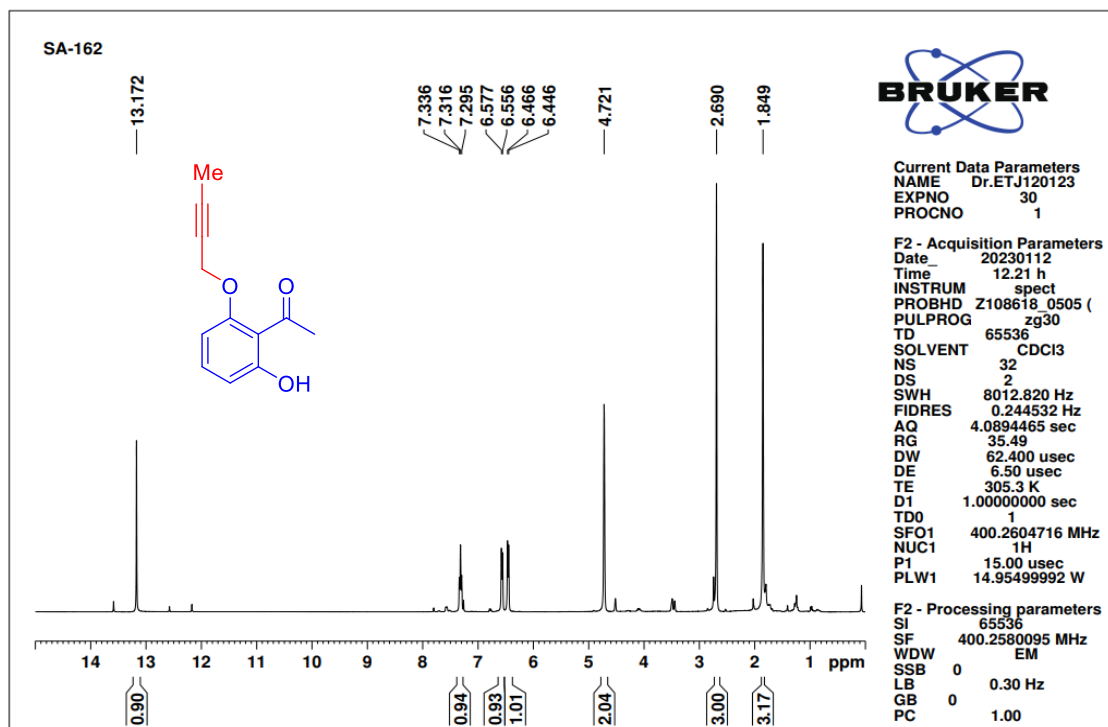Figure 200:  $^1\text{H}$ -NMR spectrum of compound 9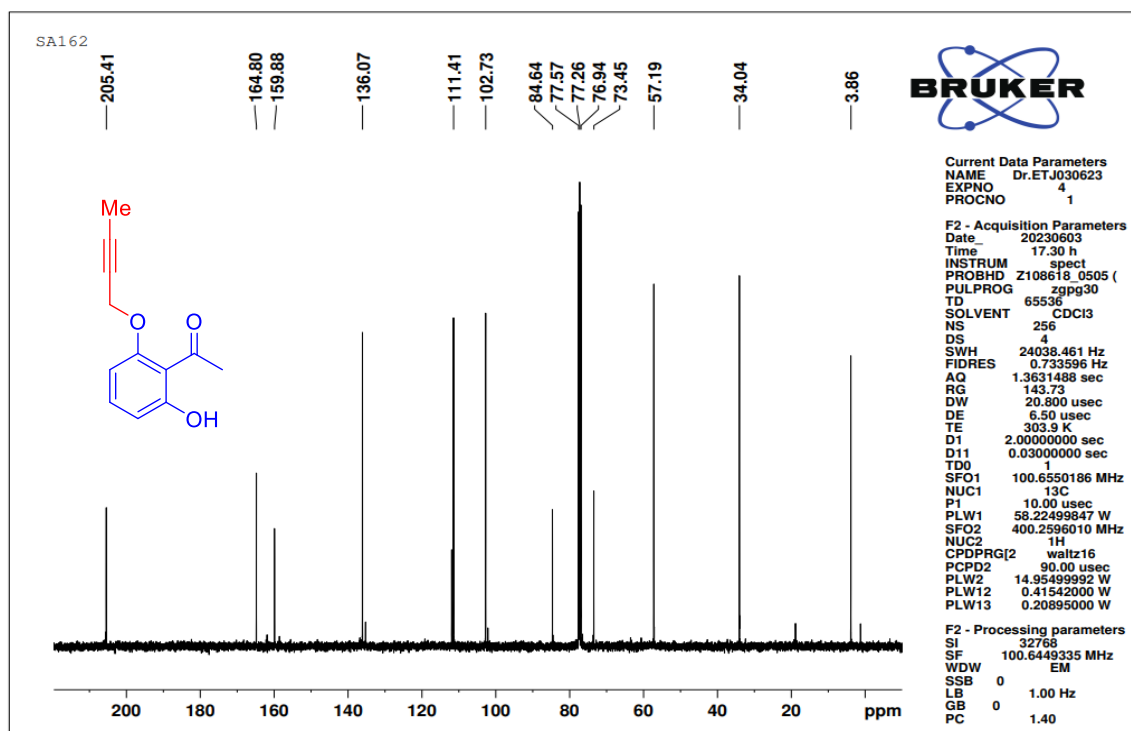Figure 201:  $^{13}\text{C}$ -NMR spectrum of compound 9

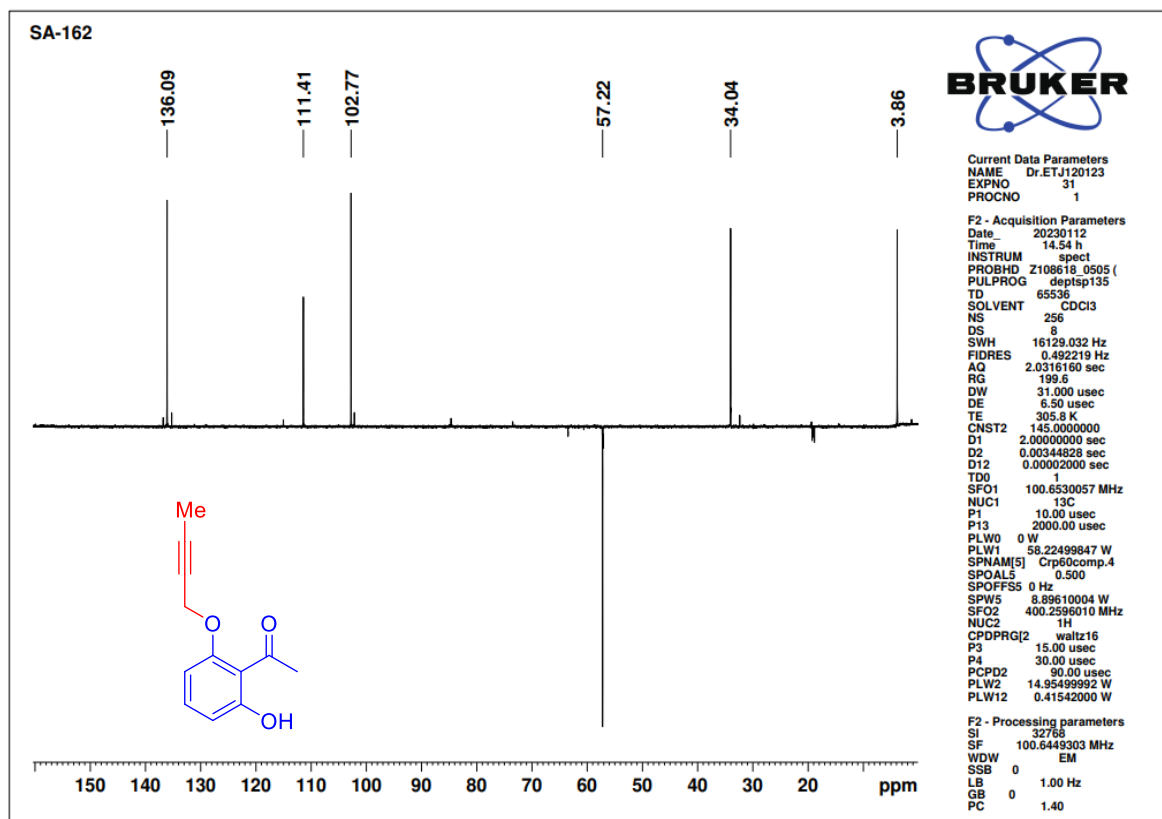

Figure 202: DEPT-135 NMR spectrum of compound 9

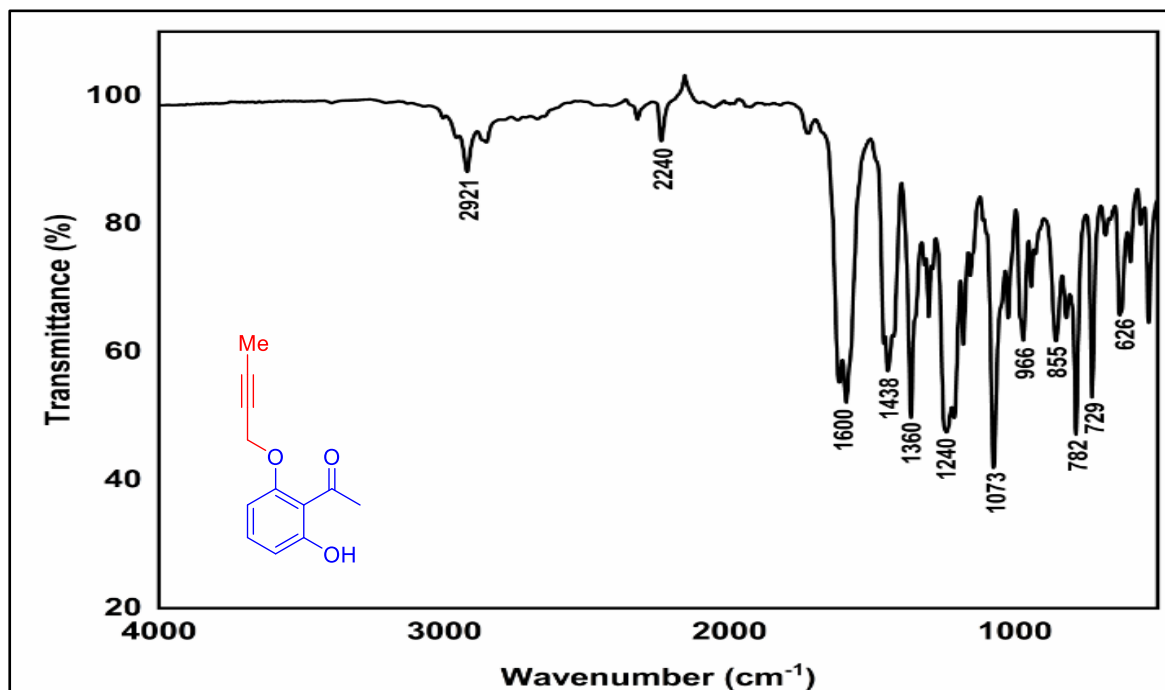

Figure 203: FT-IR spectrum of compound 9

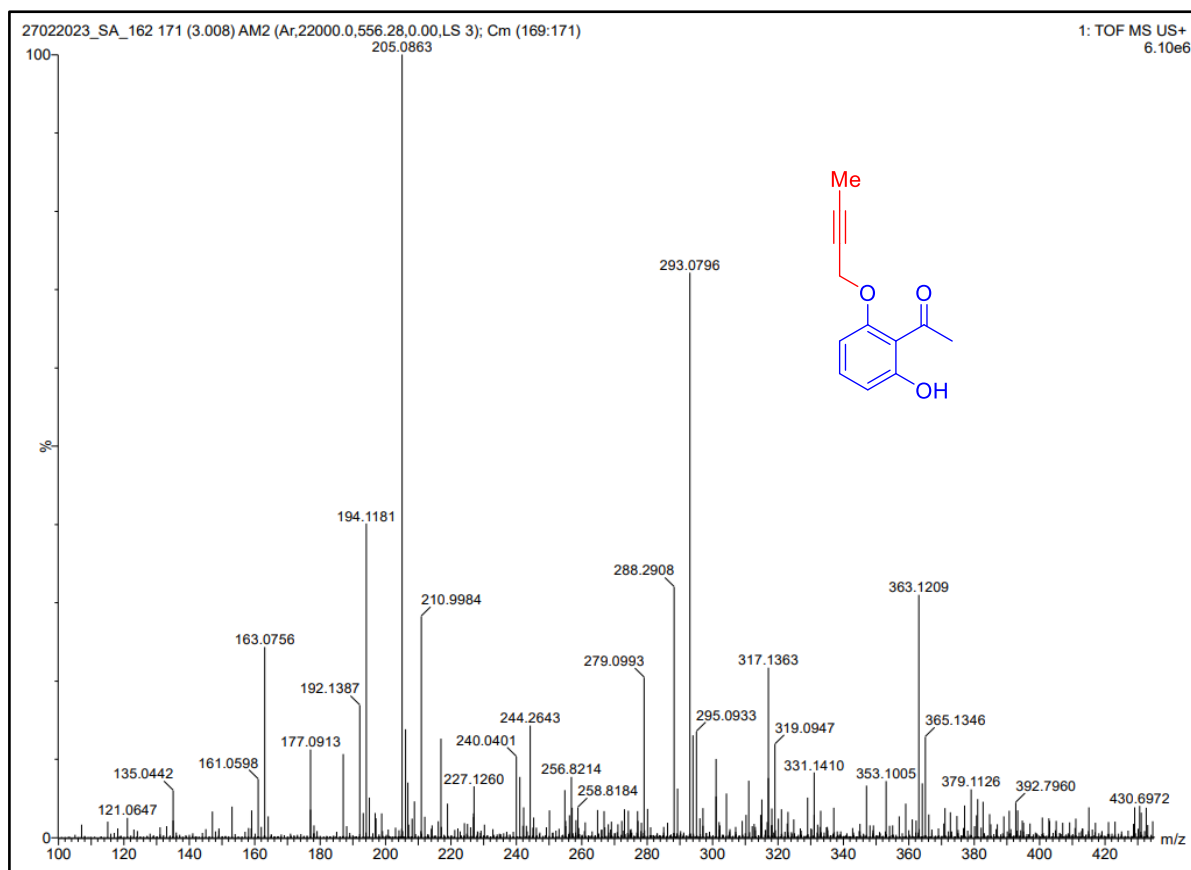

Figure 204: HRMS spectrum of compound 9

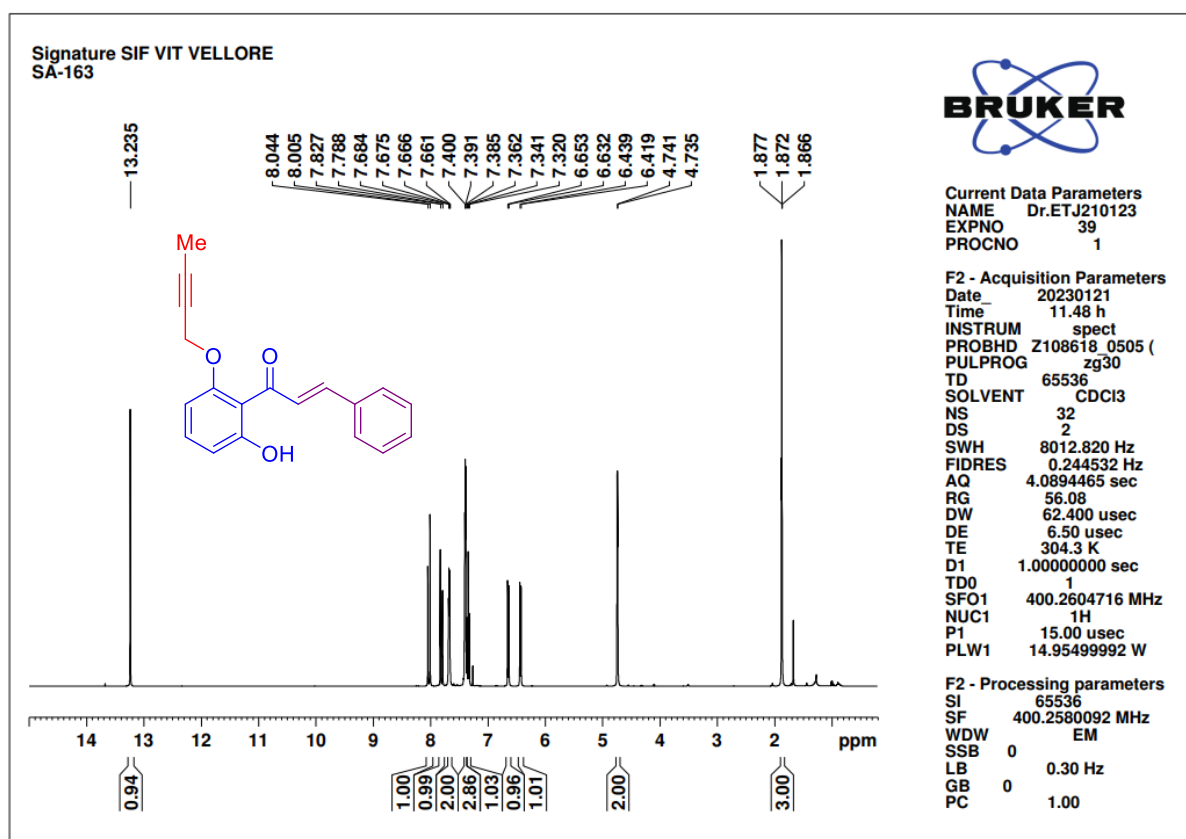Figure 205: <sup>1</sup>H-NMR spectrum of compound 10



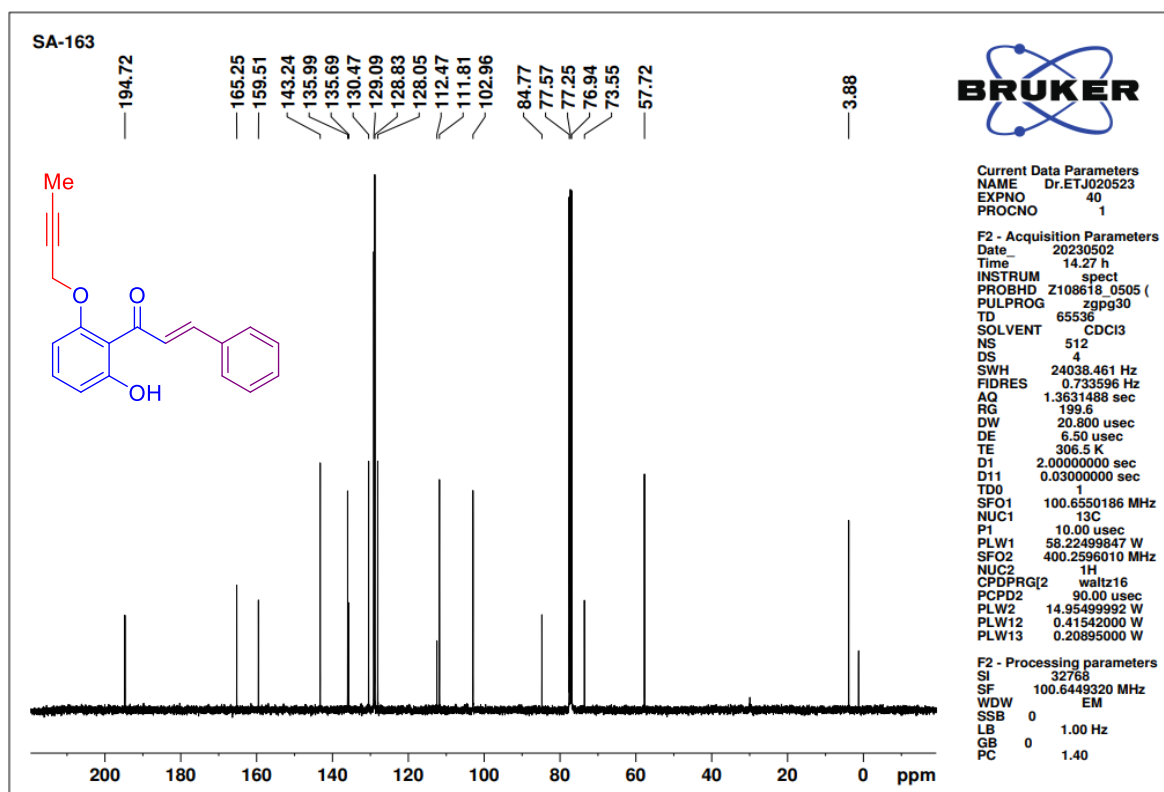Figure 206:  $^{13}\text{C}$ -NMR spectrum of compound 10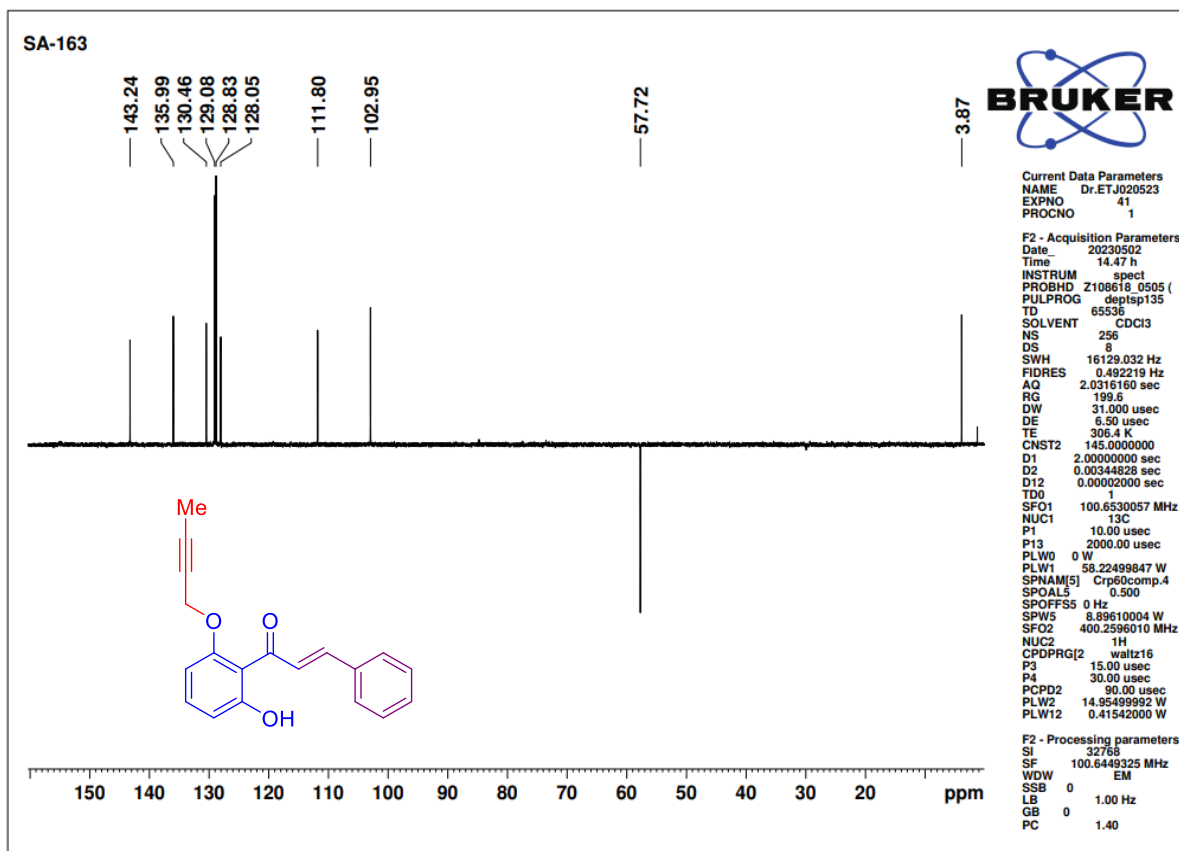

Figure 207: DEPT -135 NMR spectrum of compound 10

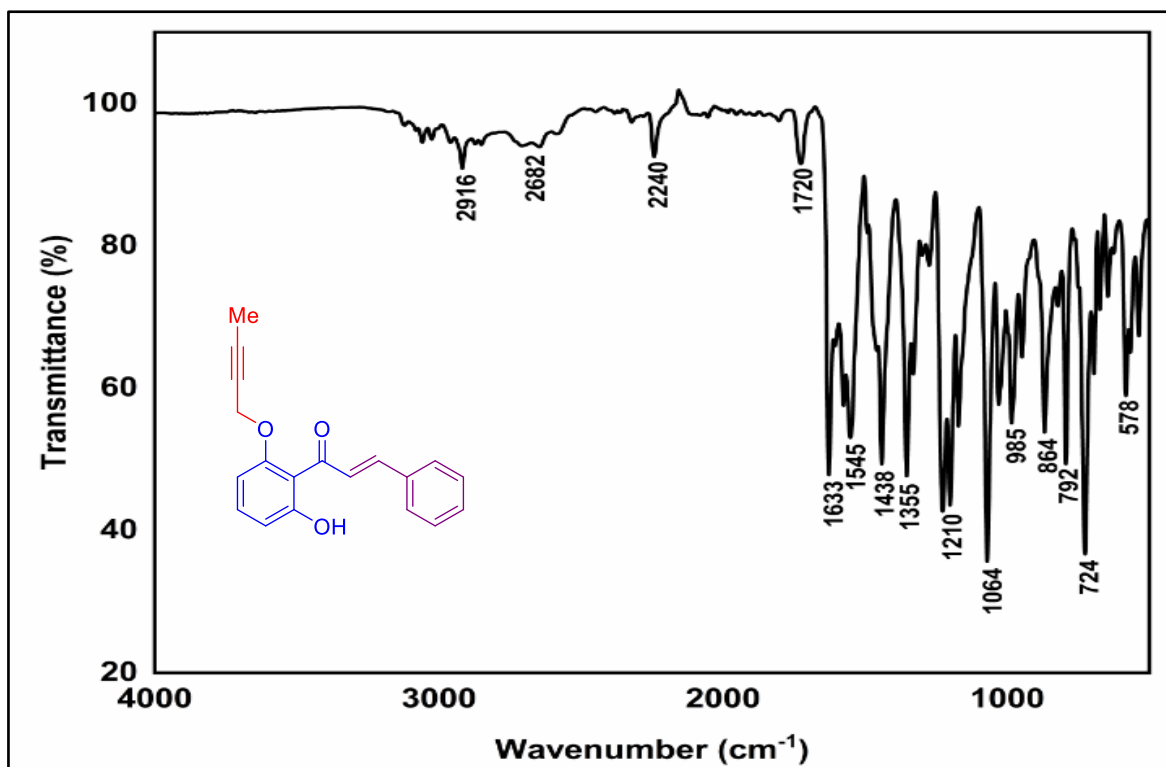

Figure 208: FT-IR spectrum of compound 10

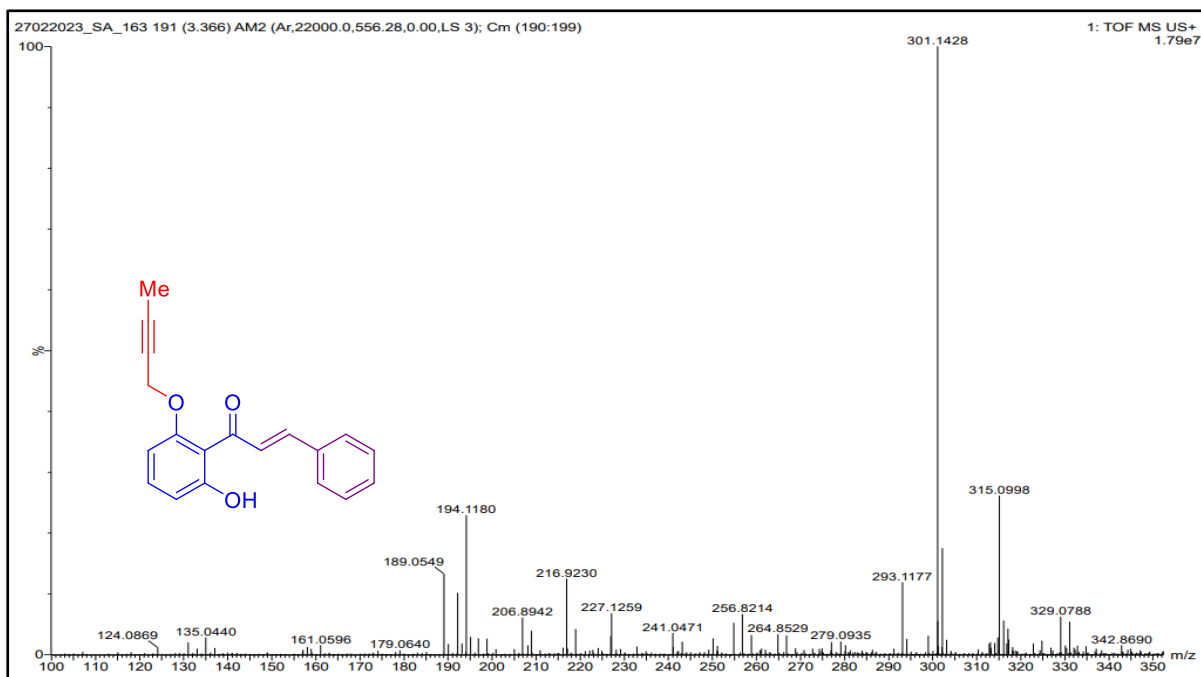

Figure 209: HRMS spectrum of compound 10

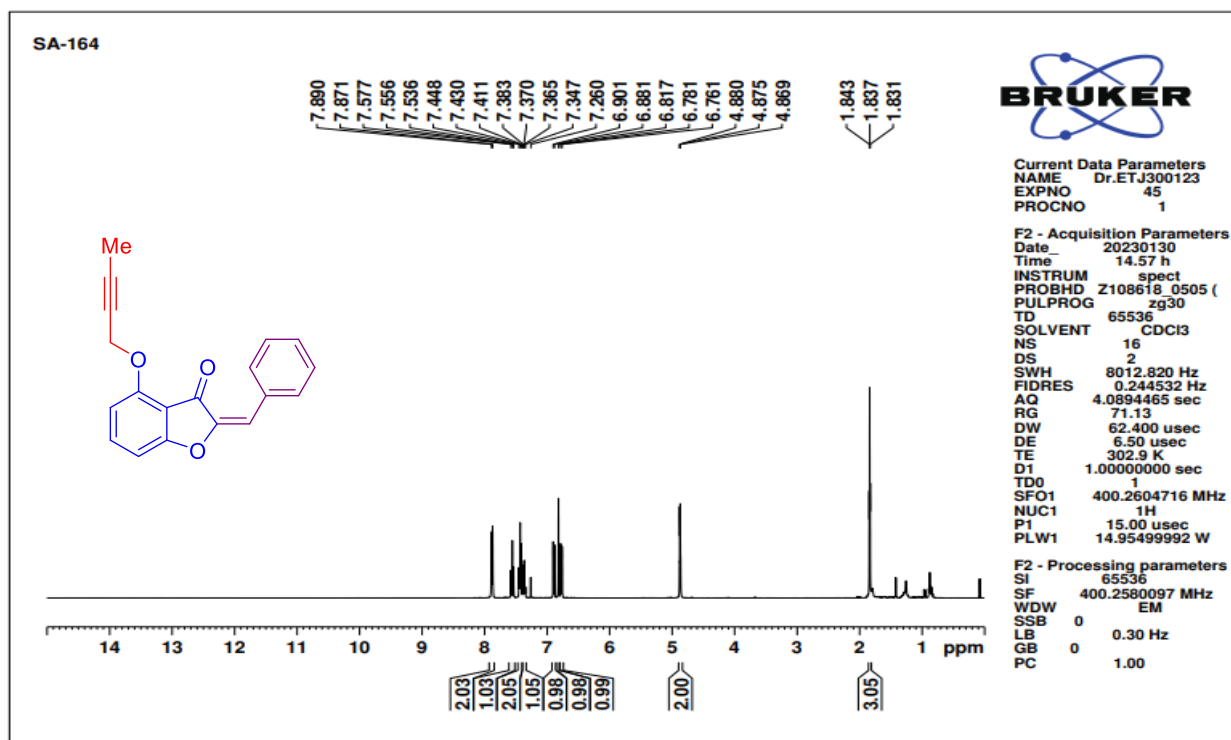Figure 210:  $^1\text{H}$ -NMR spectrum of compound 11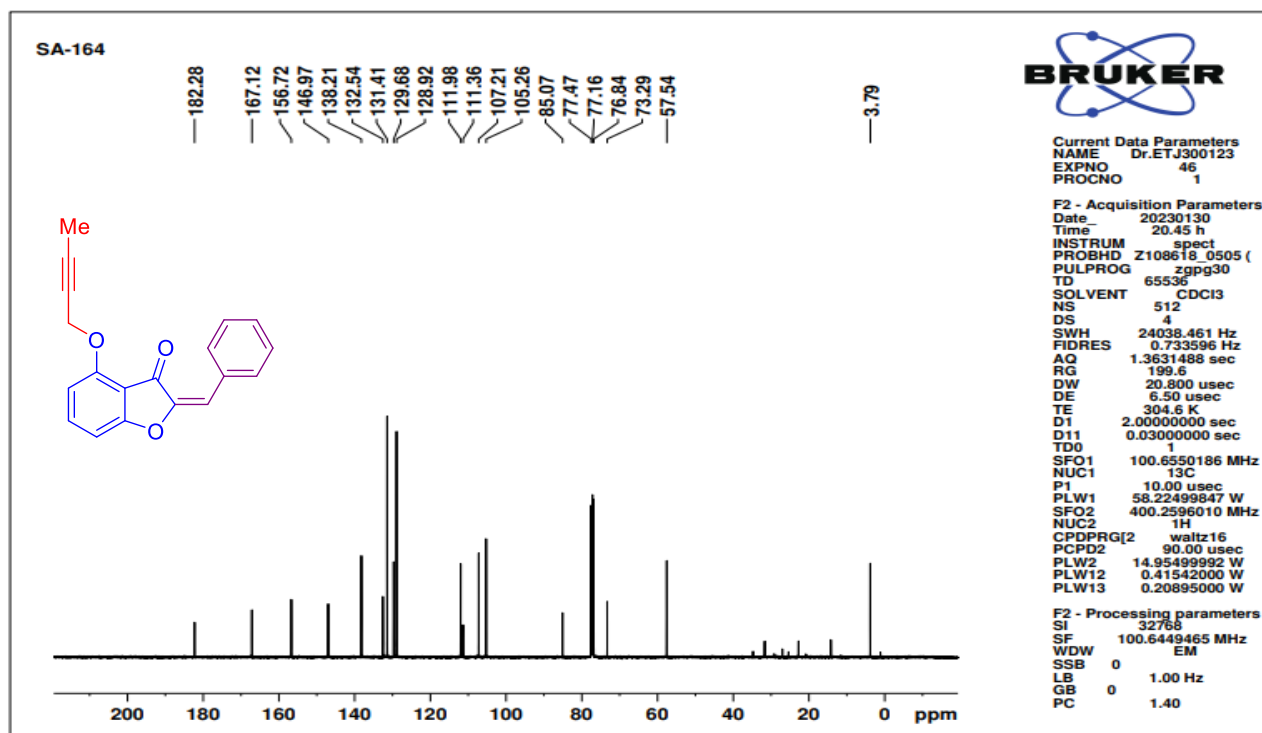Figure 211:  $^{13}\text{C}$ -NMR spectrum of compound 11

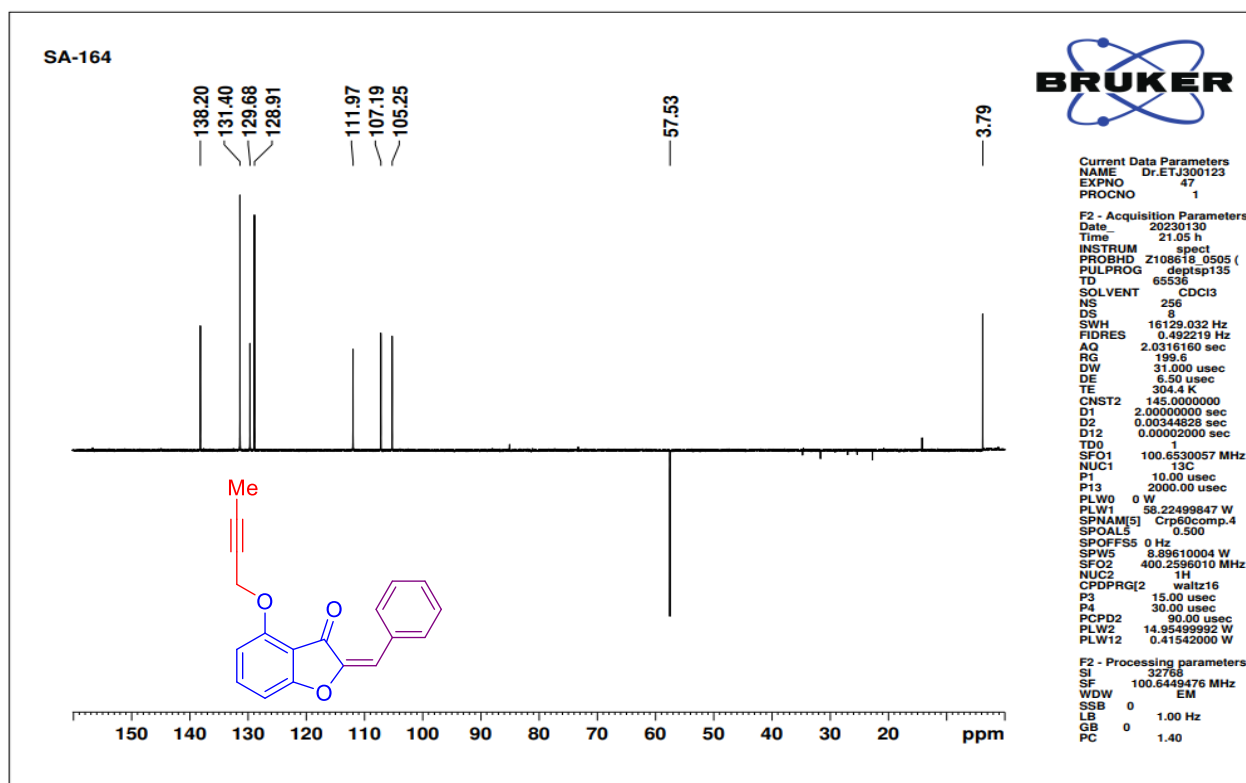

Figure 212: DEPT-135-NMR spectrum of compound 11

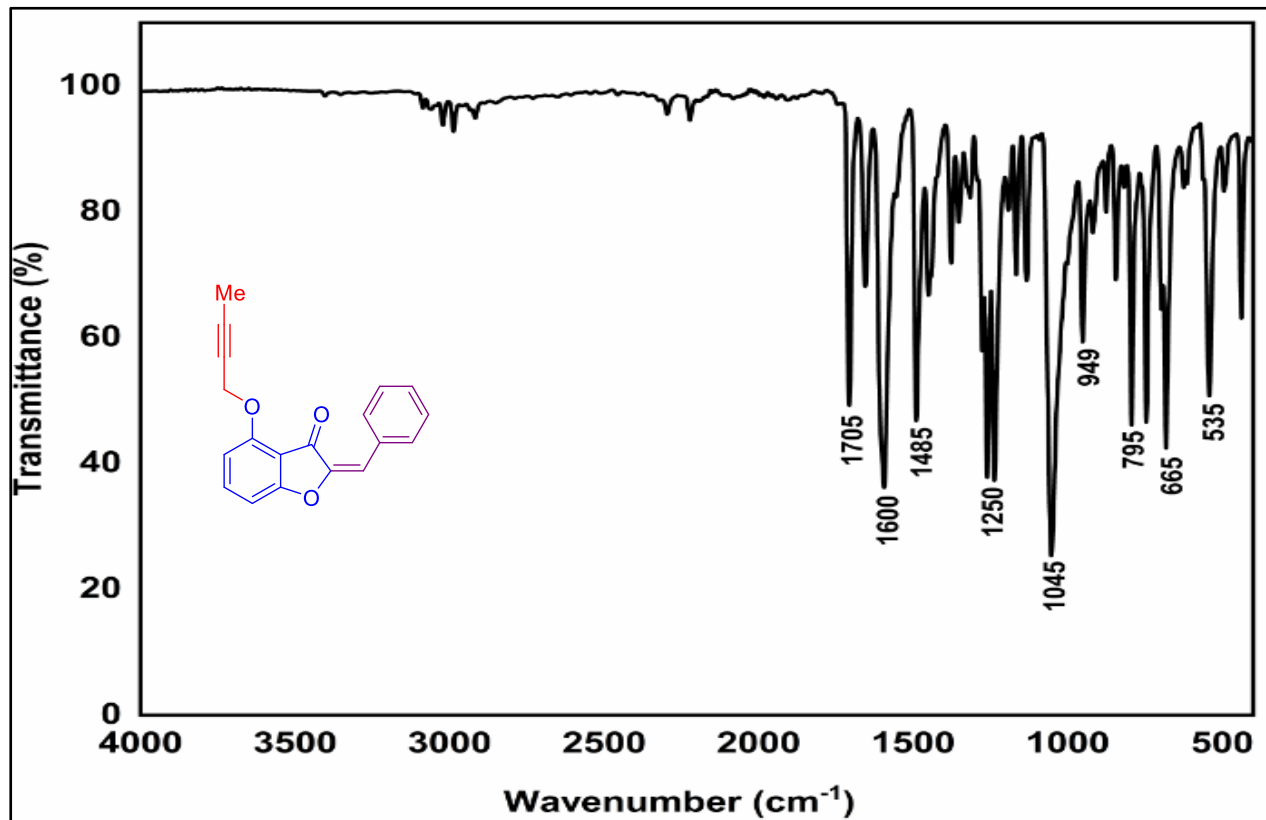

Figure 213: FT-IR spectrum of compound 11

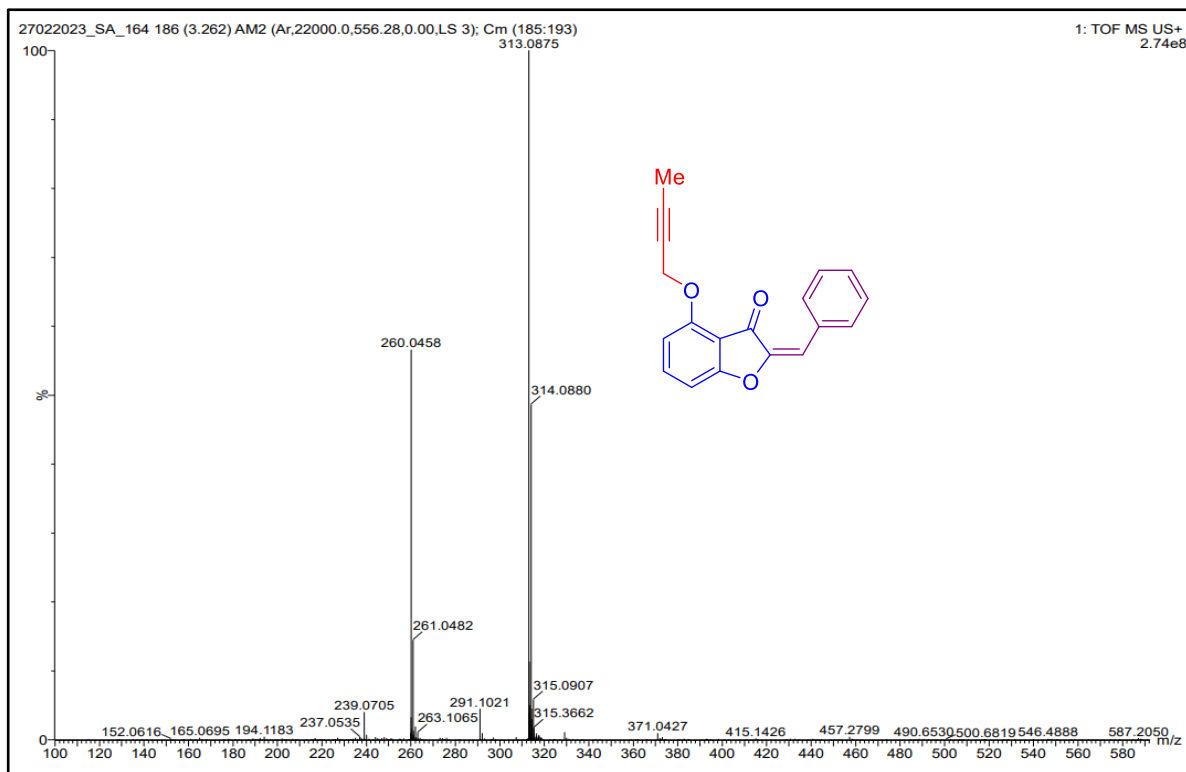

Figure 214: HRMS spectrum of compound 11

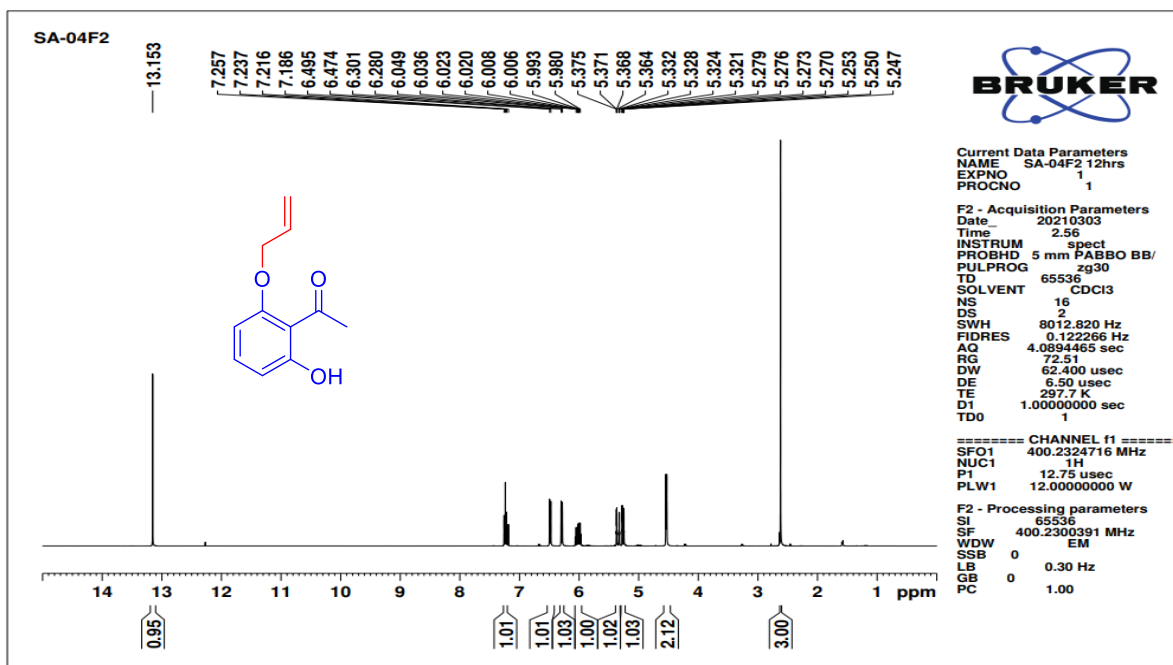Figure 215: <sup>13</sup>H-NMR spectrum of compound 17

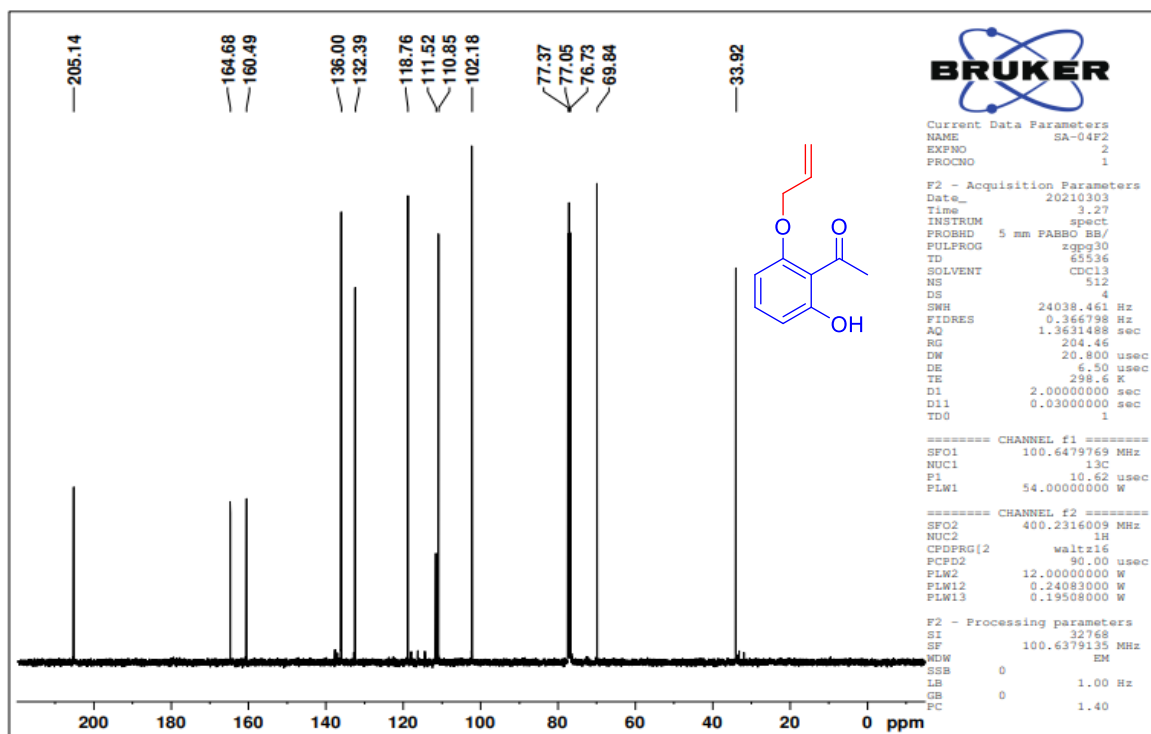Figure 216:  $^{13}\text{C}$ -NMR spectrum of compound 17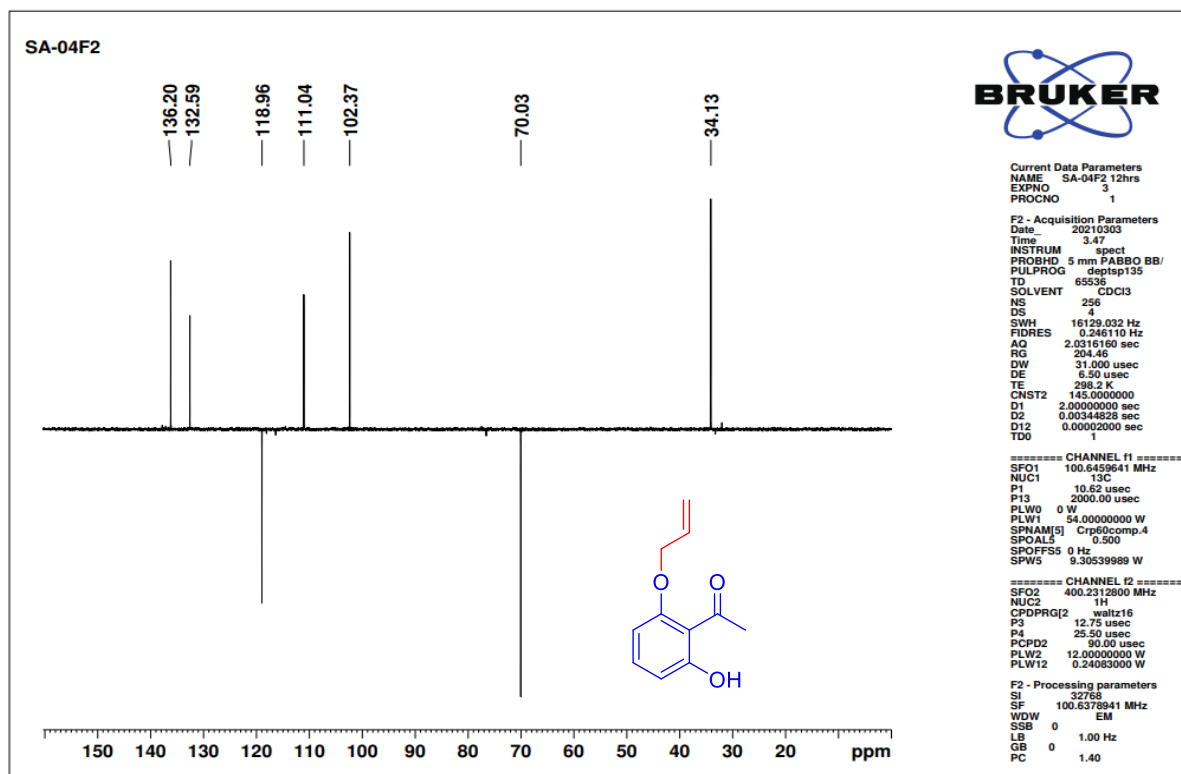

Figure 217: DEPT-135 NMR spectrum of compound 17

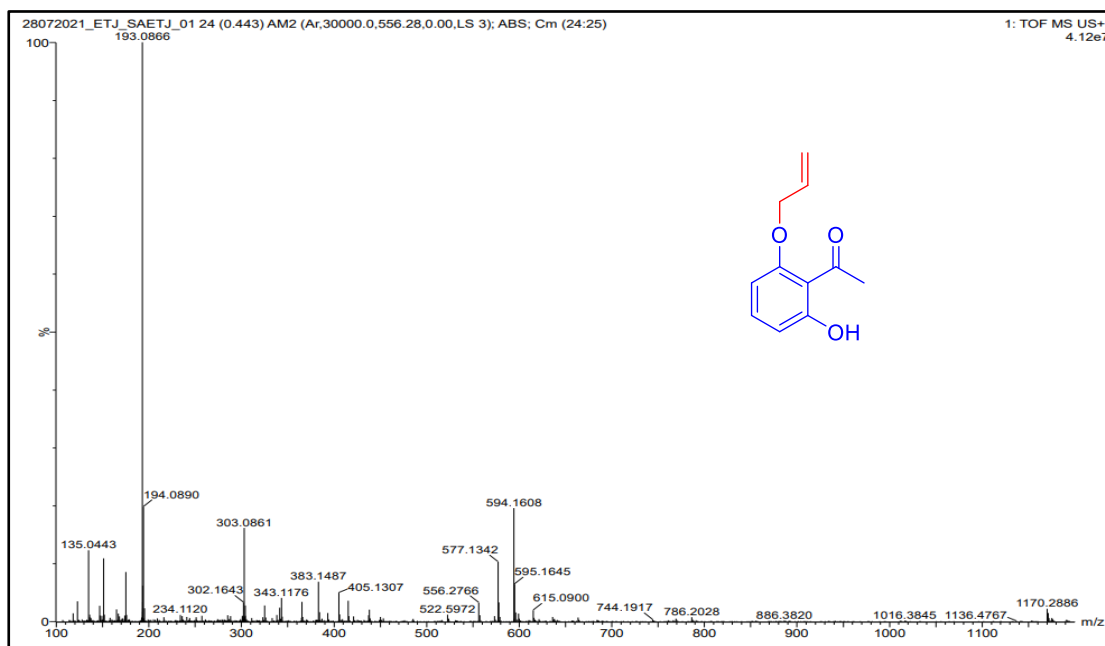

Figure 218: HRMS spectrum of compound 17

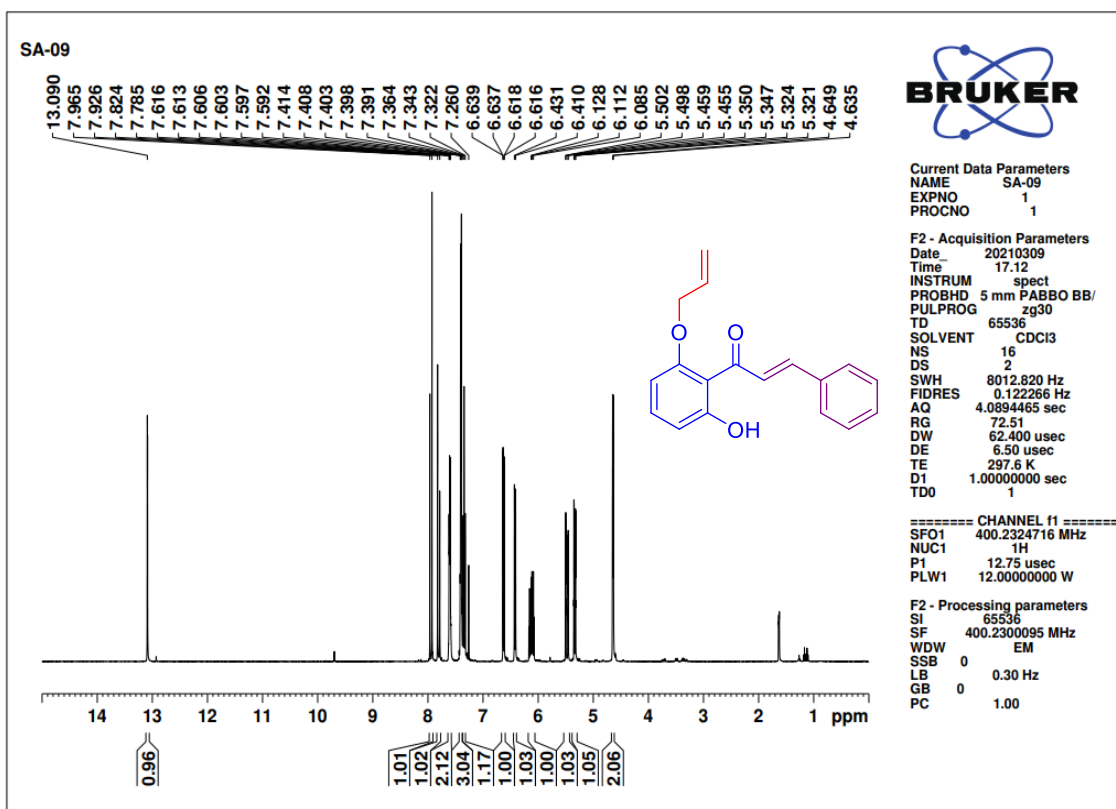Figure 219: <sup>1</sup>H-NMR spectrum of compound 18

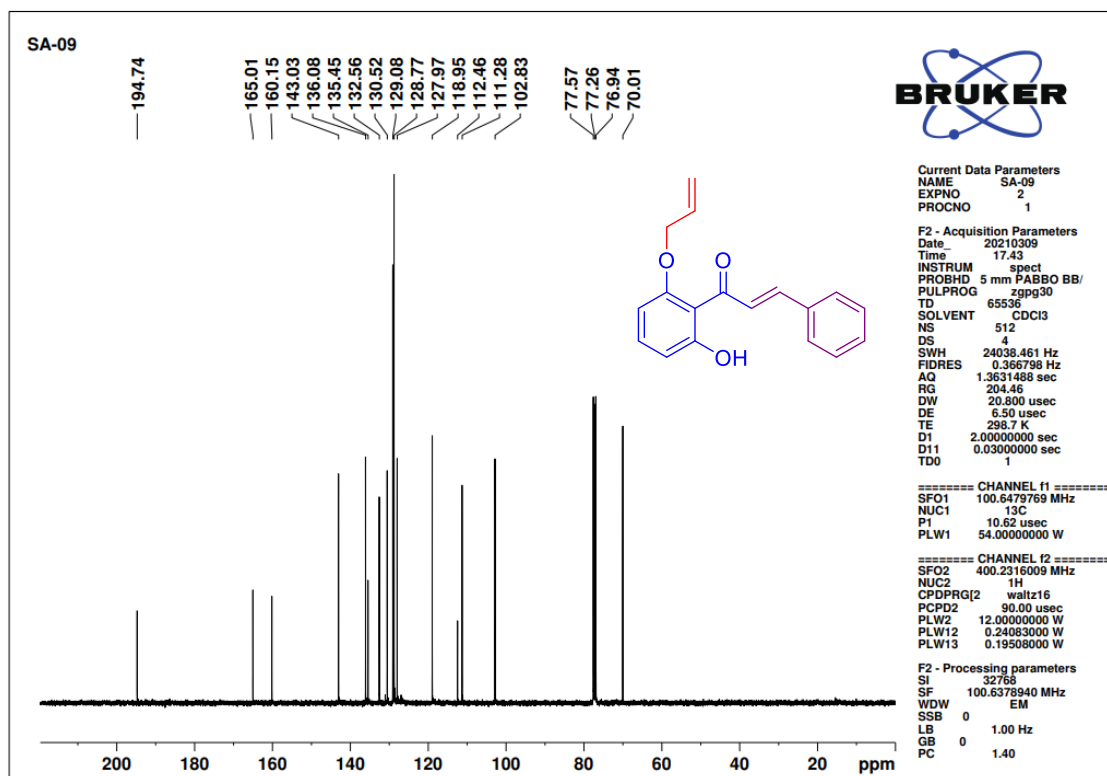Figure 220:  $^{13}\text{C}$ -NMR spectrum of compound 18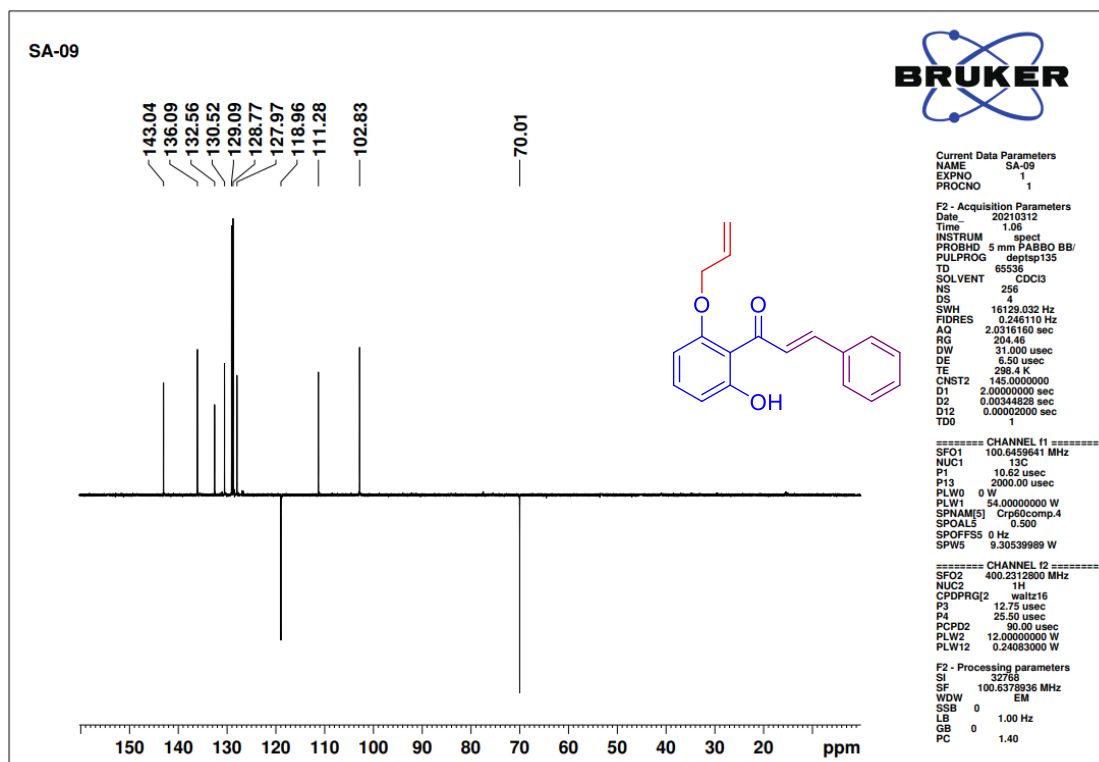

Figure 221: DEPT-135 NMR spectrum of compound 18



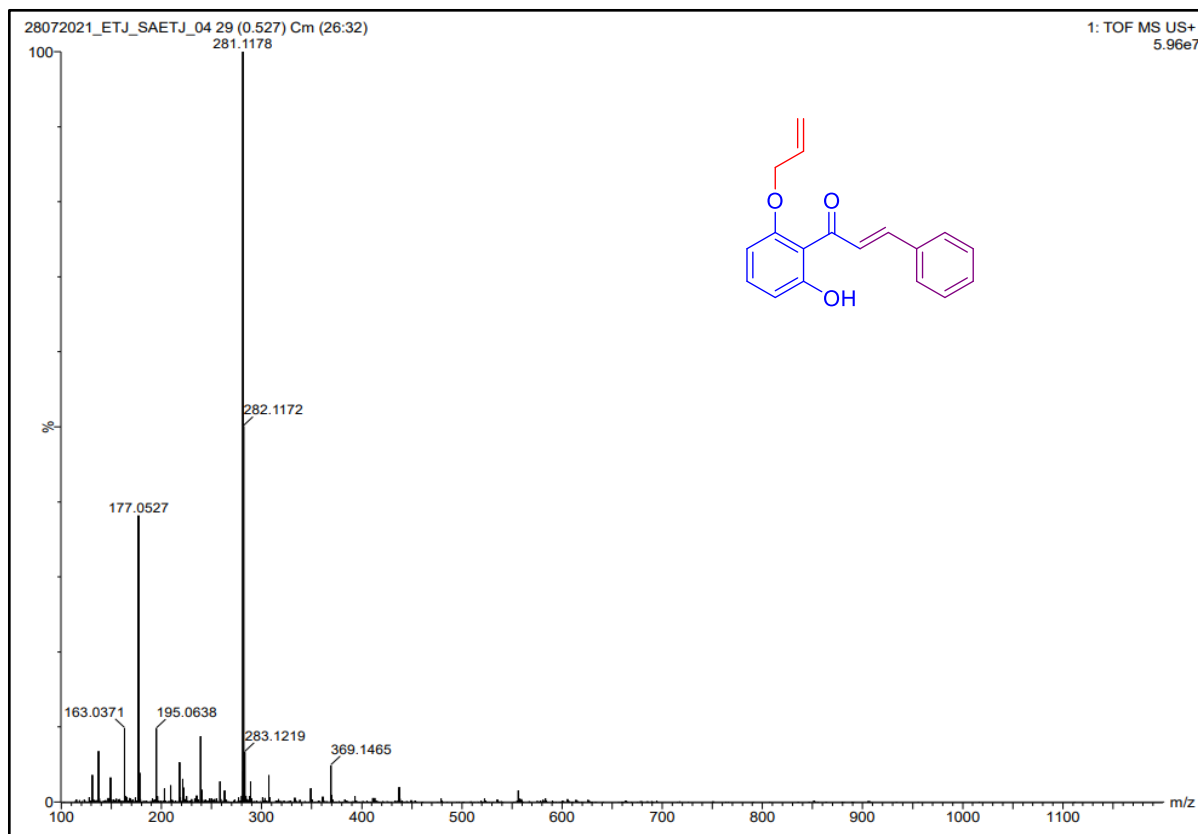

Figure 222: HRMS spectrum of compound 18

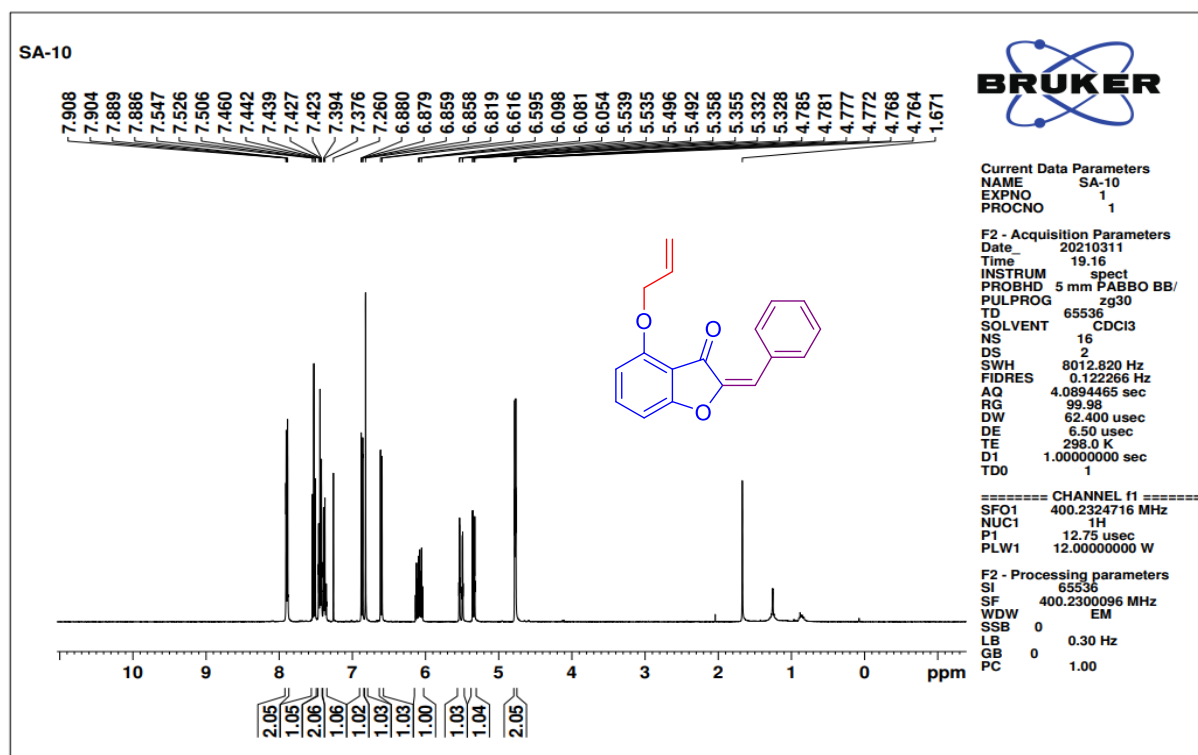Figure 223: <sup>1</sup>H-NMR spectrum of compound 19

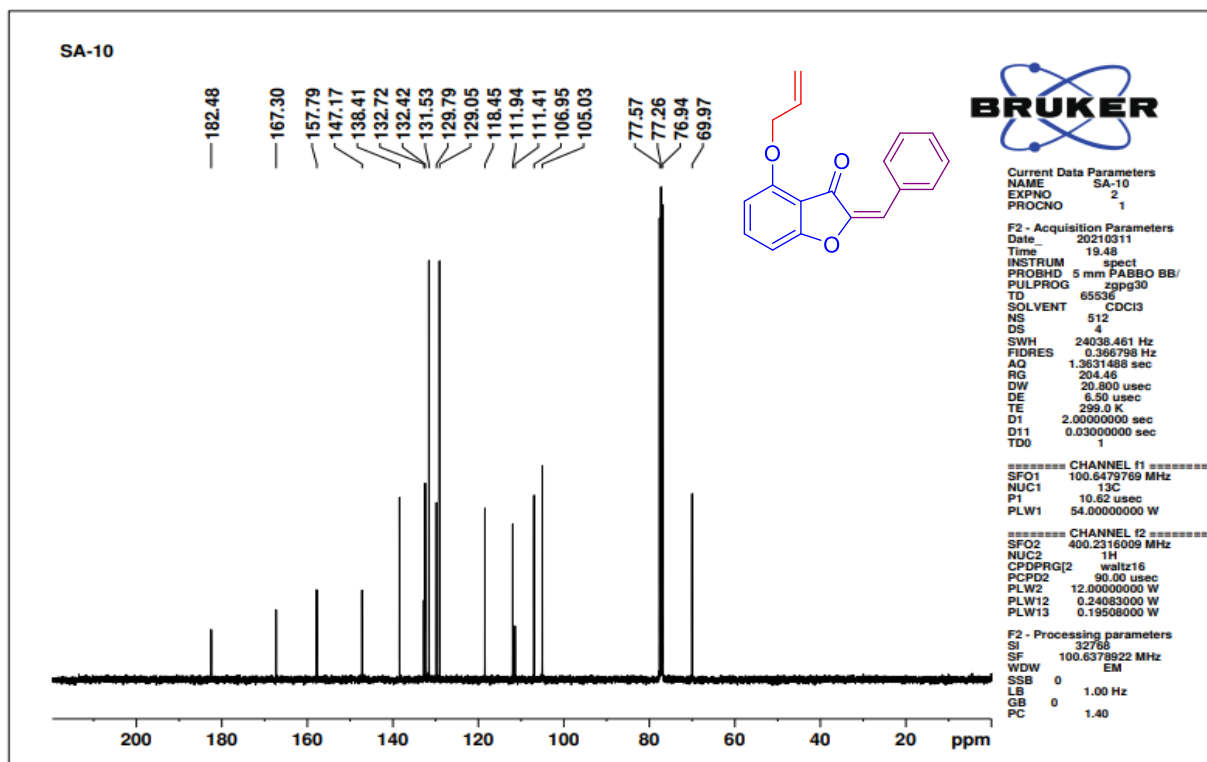Figure 224:  $^{13}\text{C}$ -NMR spectrum of compound 19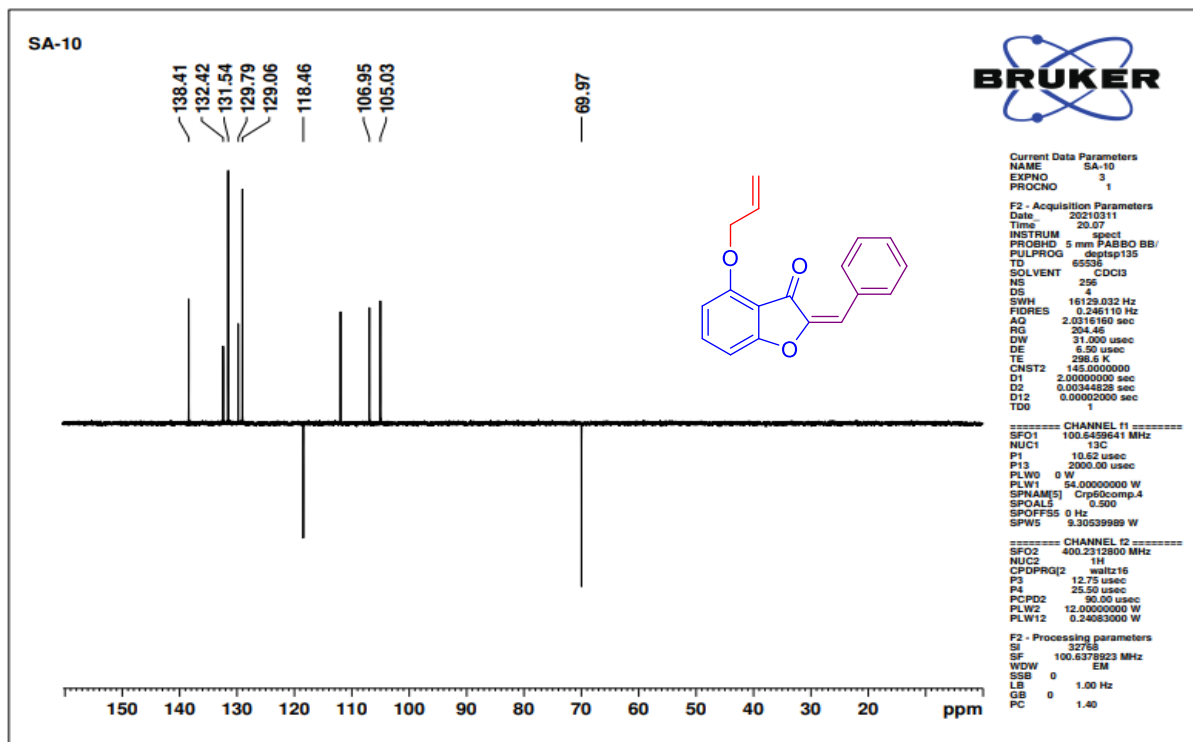

Figure 225: DEPT-135 NMR spectrum of compound 19

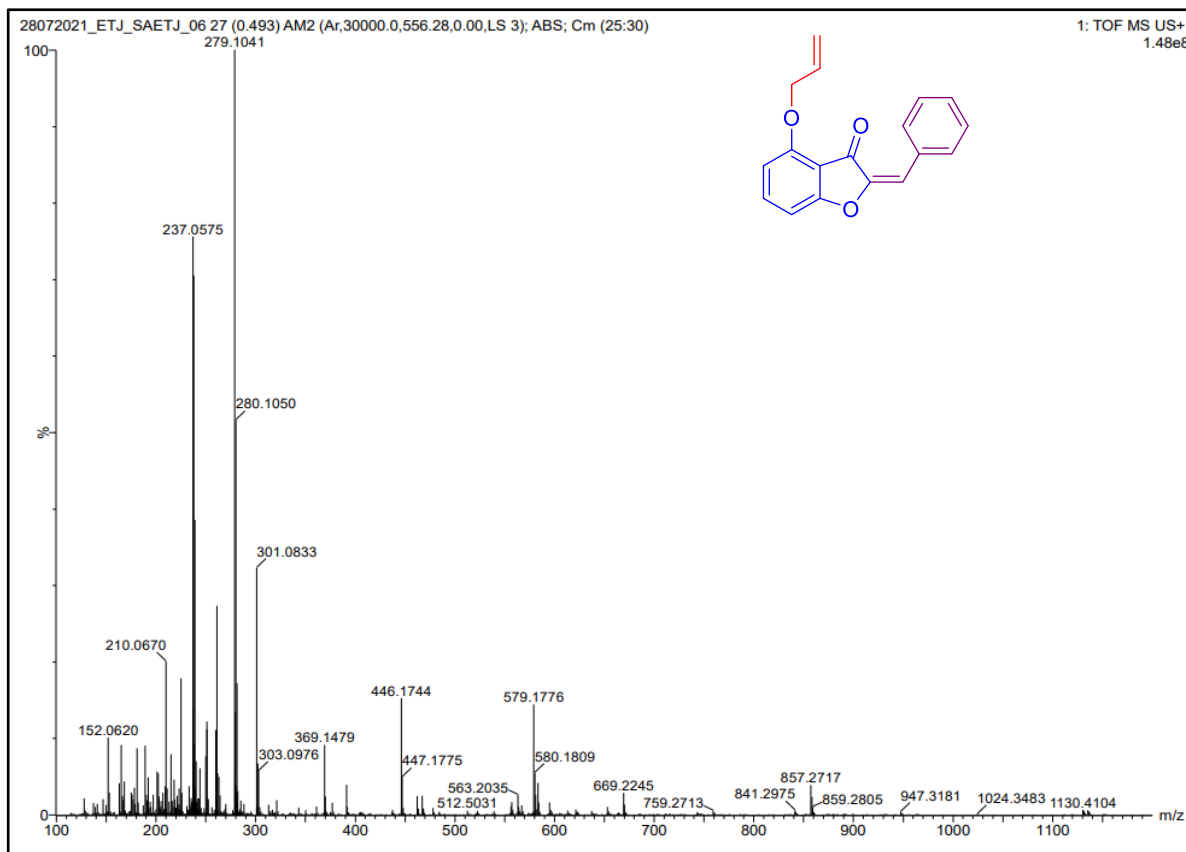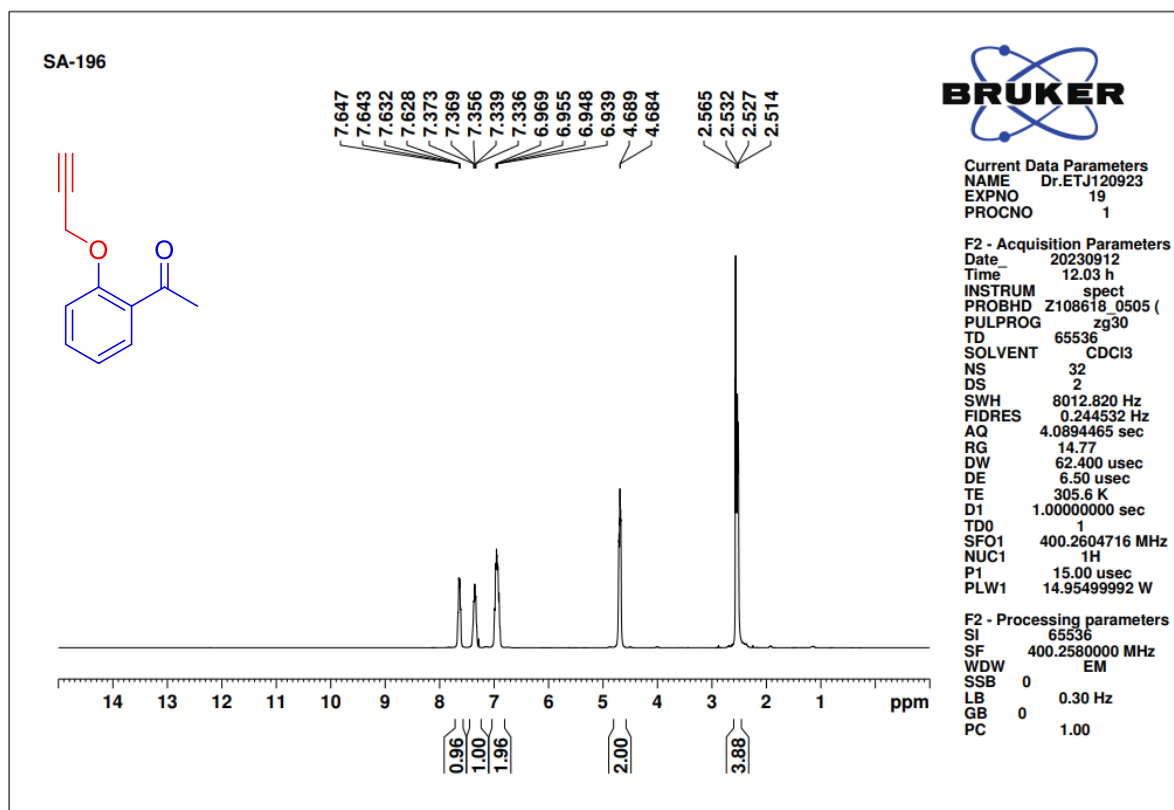

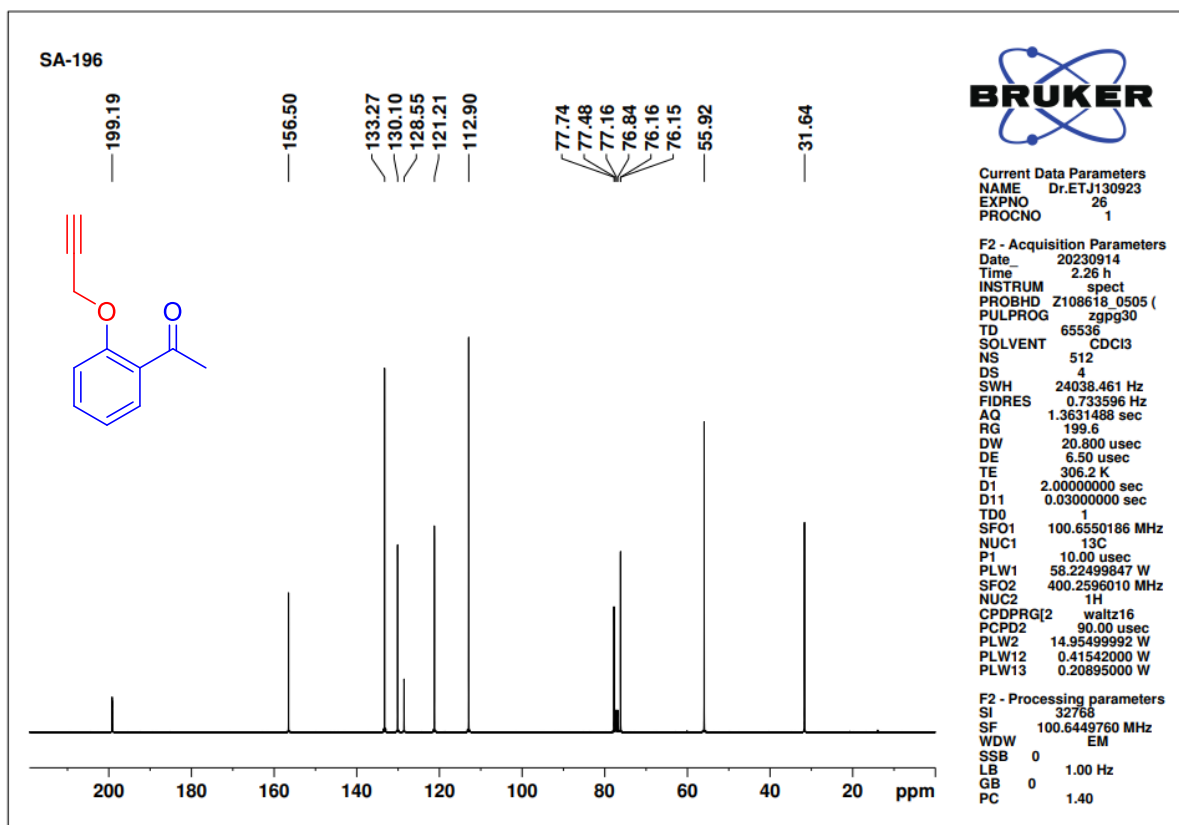Figure 228:  $^{13}\text{C}$ -NMR spectrum of compound 21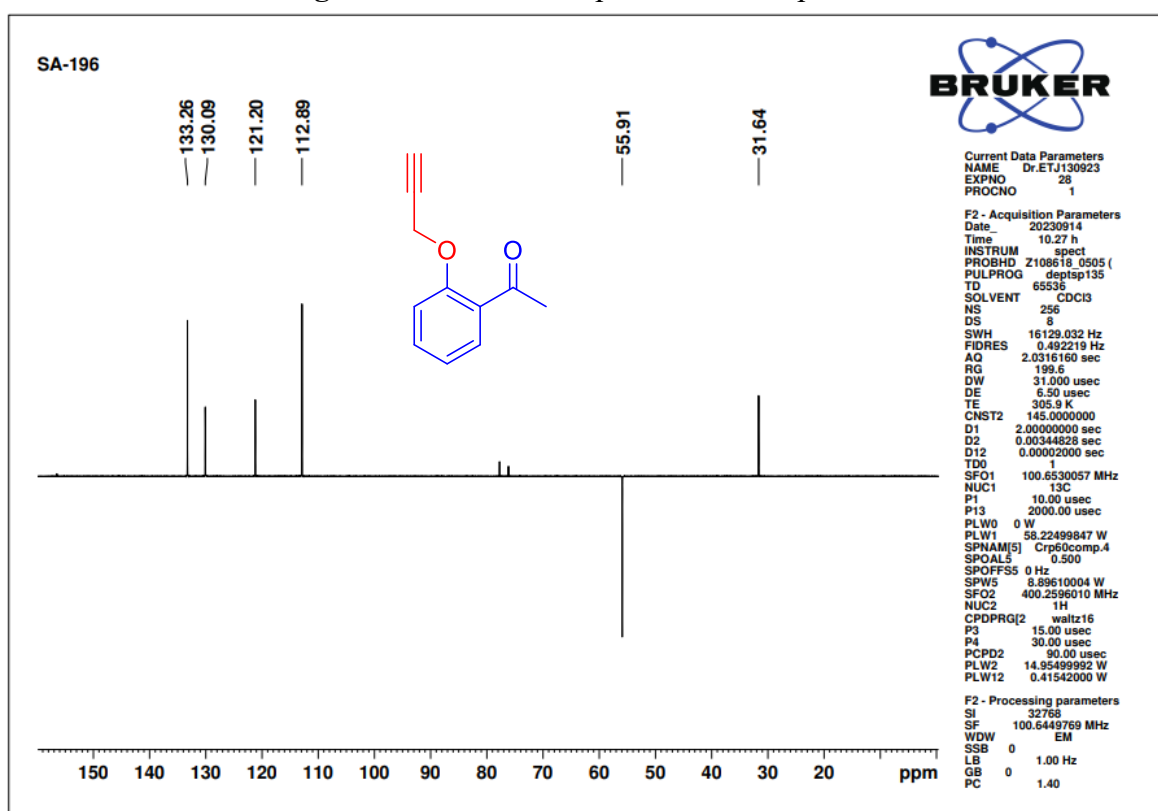

Figure 229: DEPT 135-NMR spectrum of compound 21

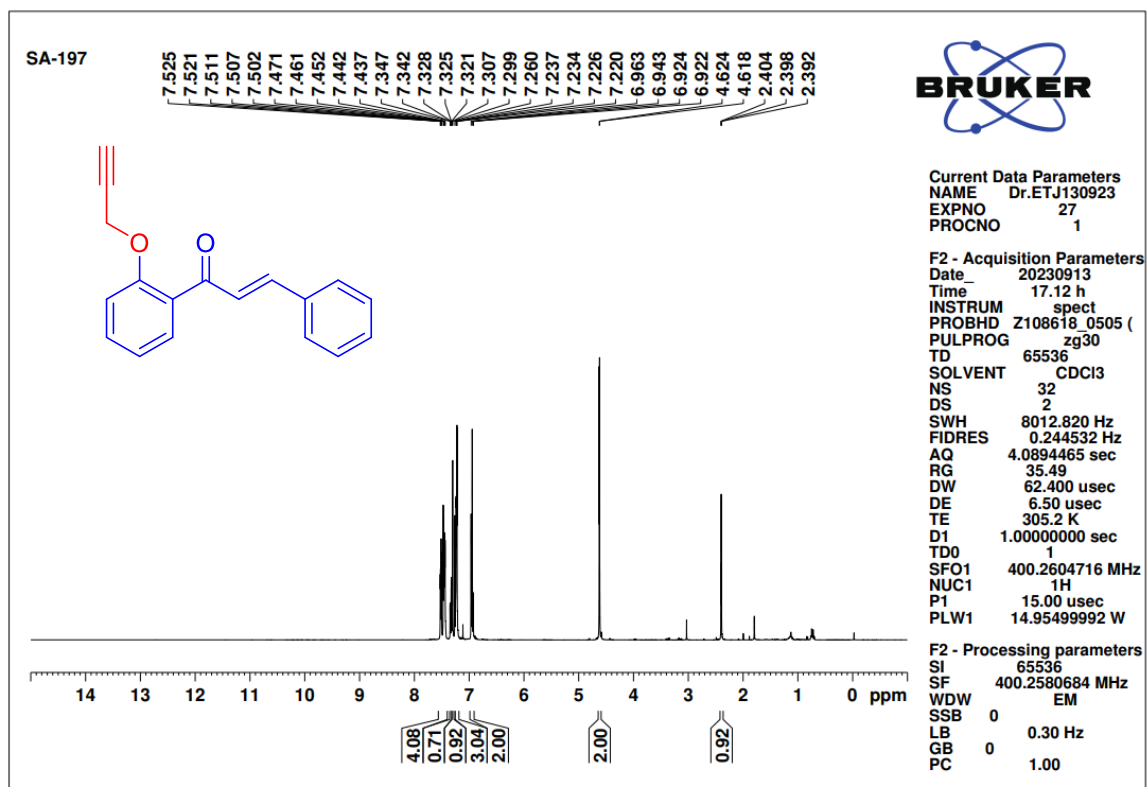Figure 230:  $^1\text{H}$ -NMR spectrum of compound 22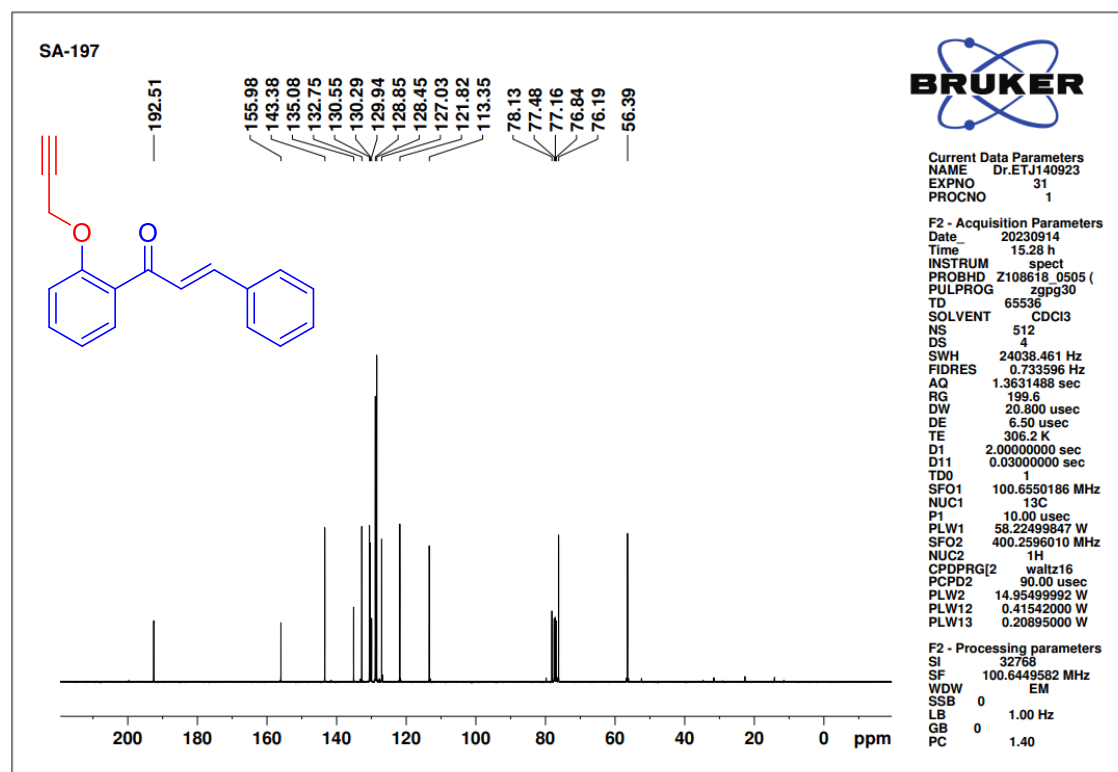Figure 231:  $^{13}\text{C}$ -NMR spectrum of compound 22

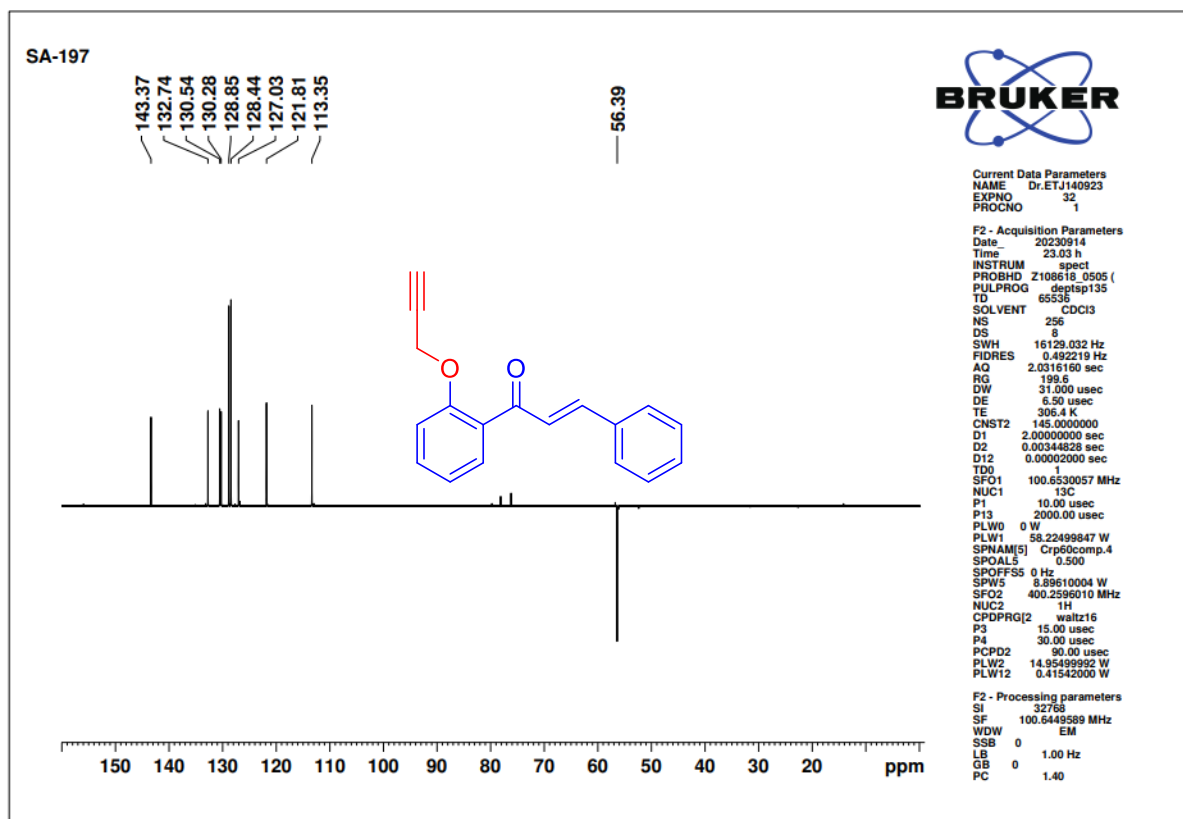

Figure 232: DEPT 135-NMR spectrum of compound 22

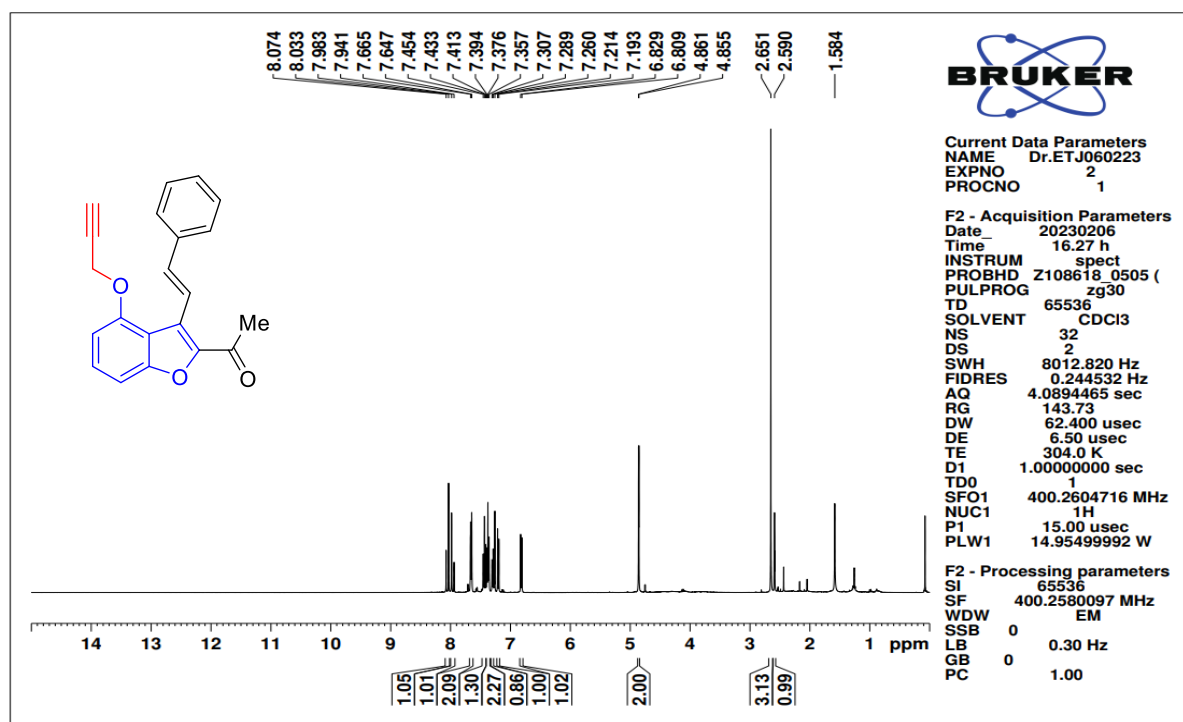Figure 233:  $^1\text{H}$ -NMR spectrum of compound 23

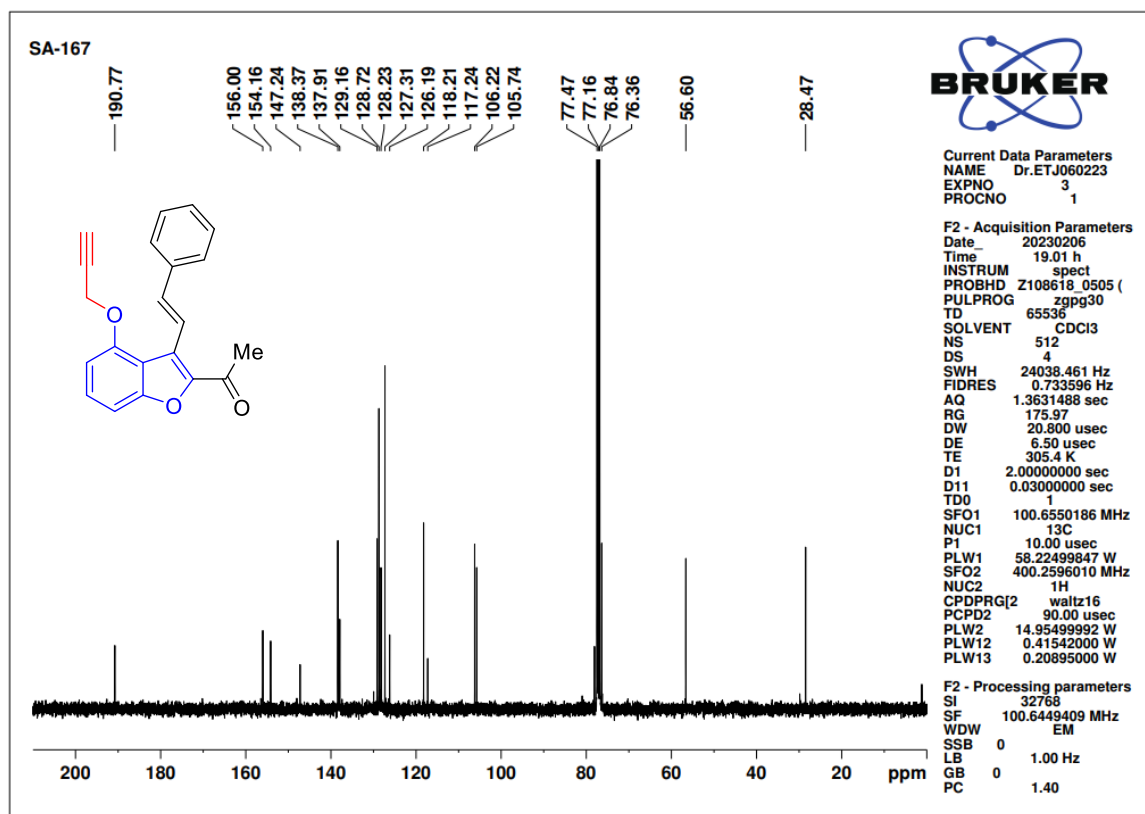Figure 234:  $^{13}\text{C}$ -NMR spectrum of compound 23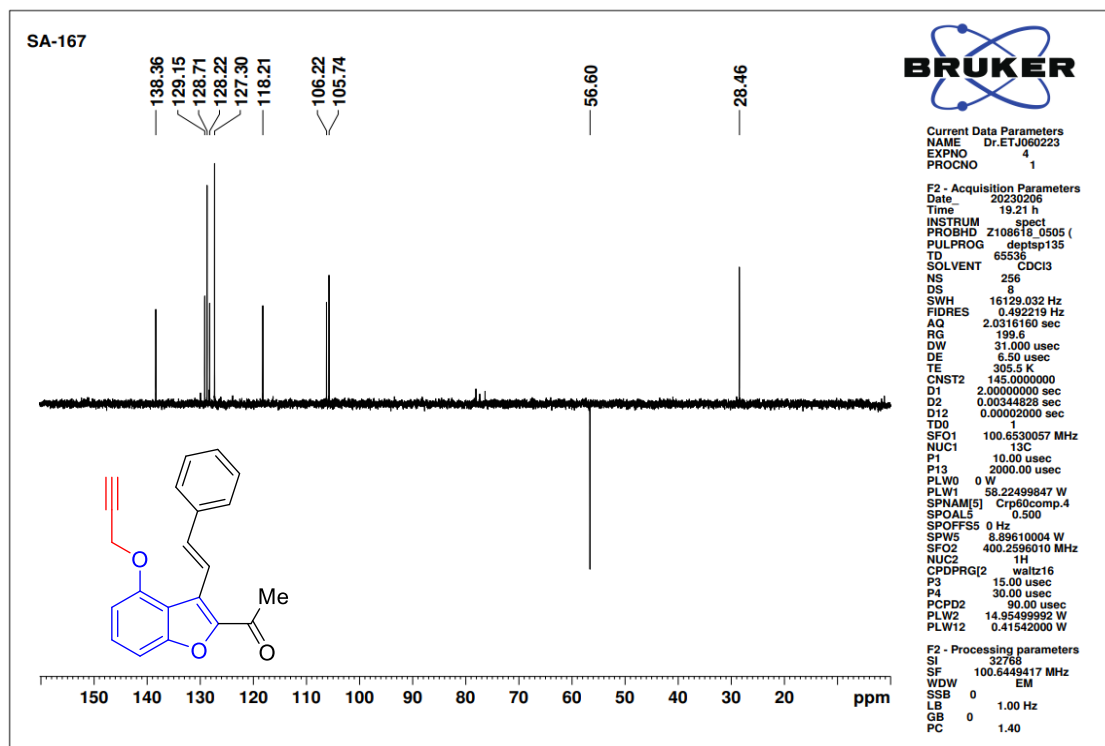

Figure 235: DEPT-135 NMR spectrum of compound 23

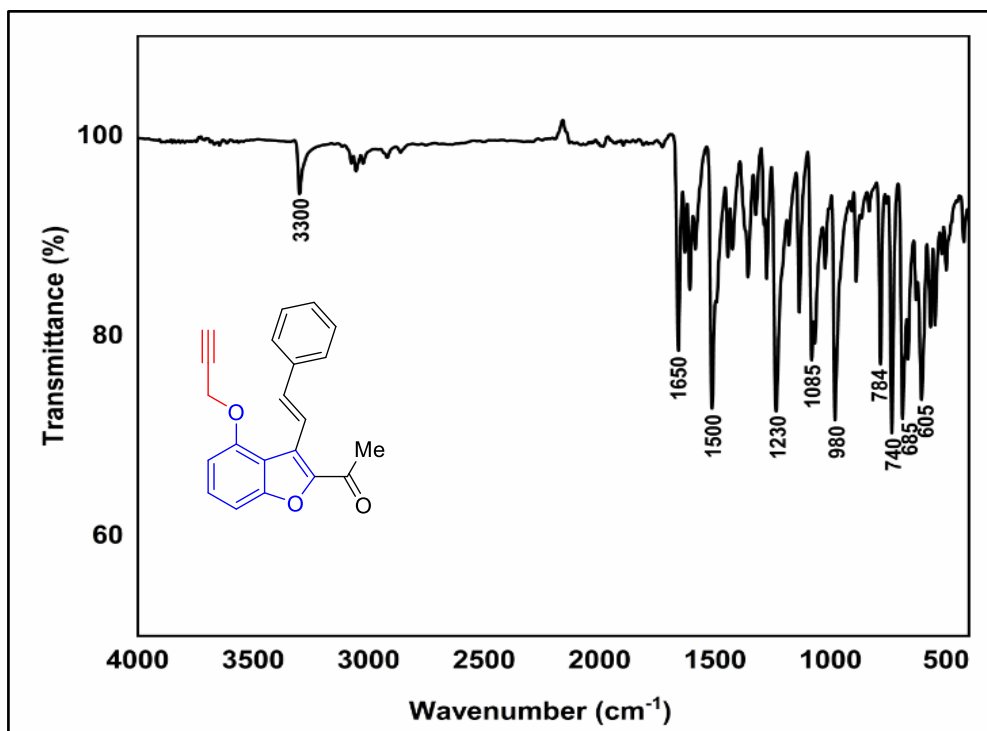

Figure 236: FT-IR spectrum of compound 23

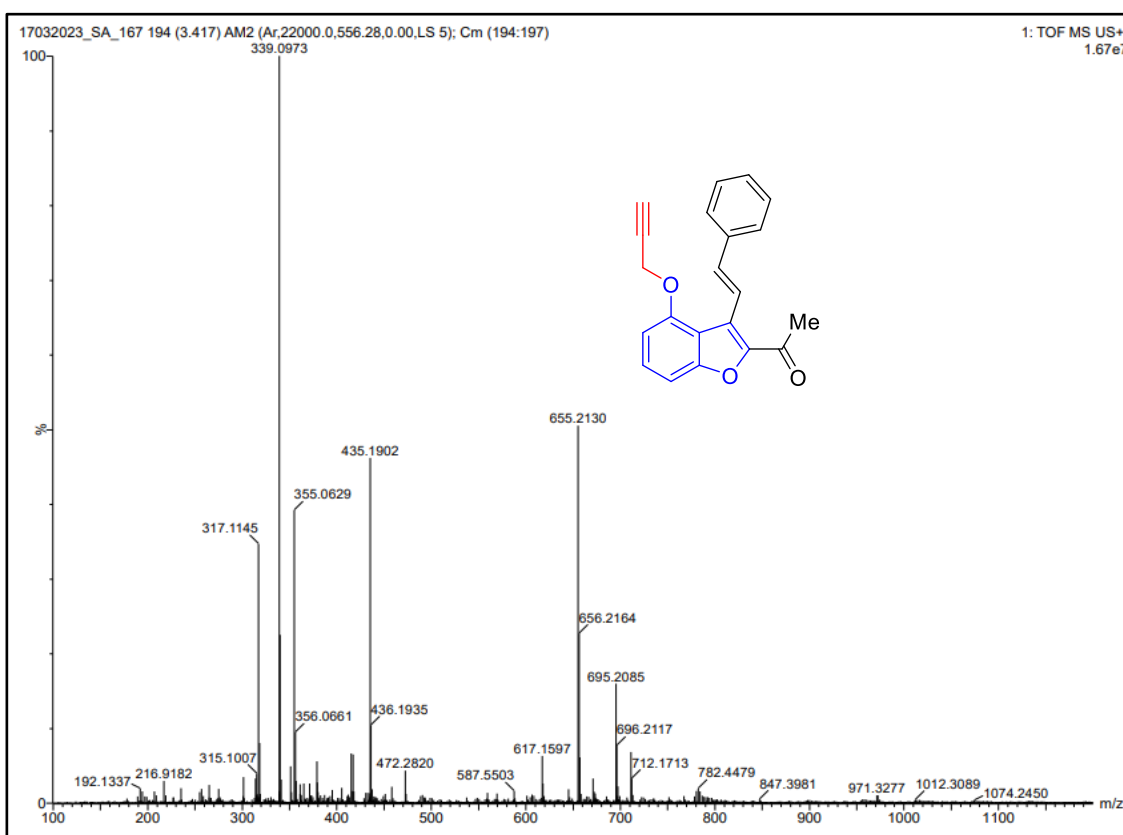

Figure 237: HRMS spectrum of compound 23



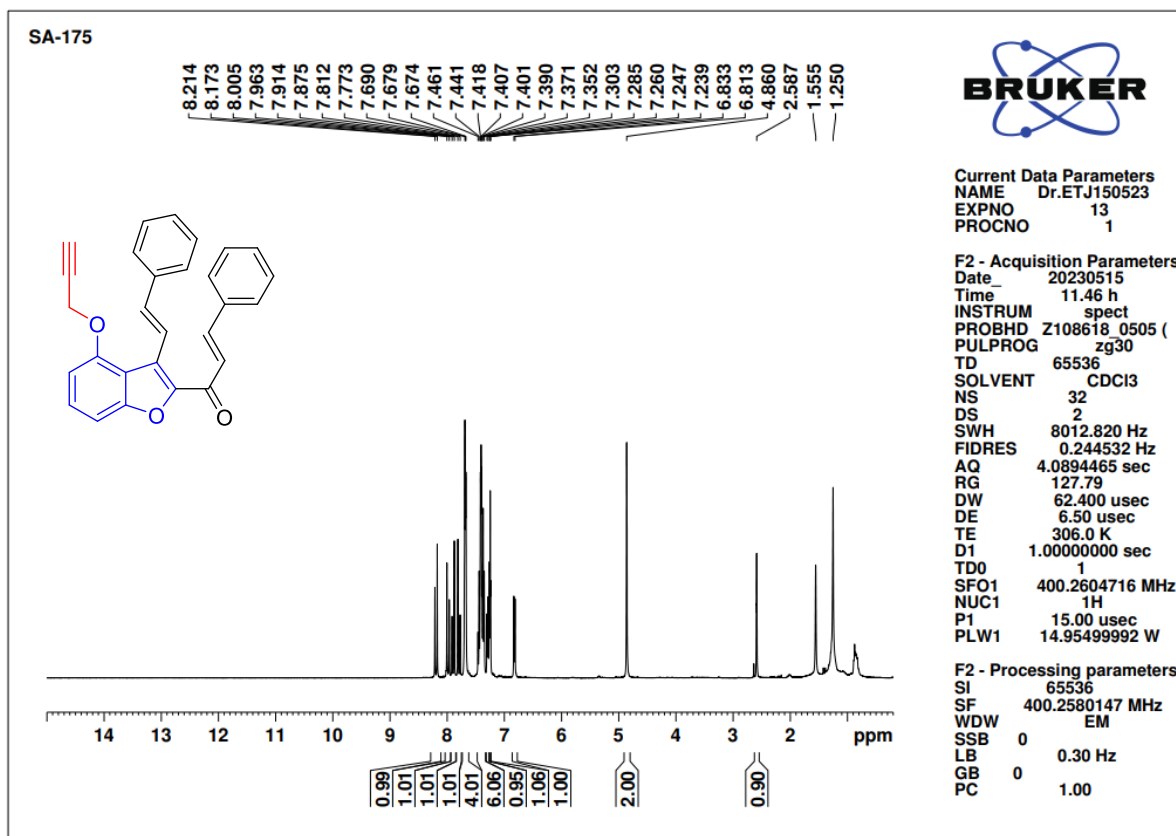Figure 238:  $^1\text{H}$ -NMR spectrum of compound 24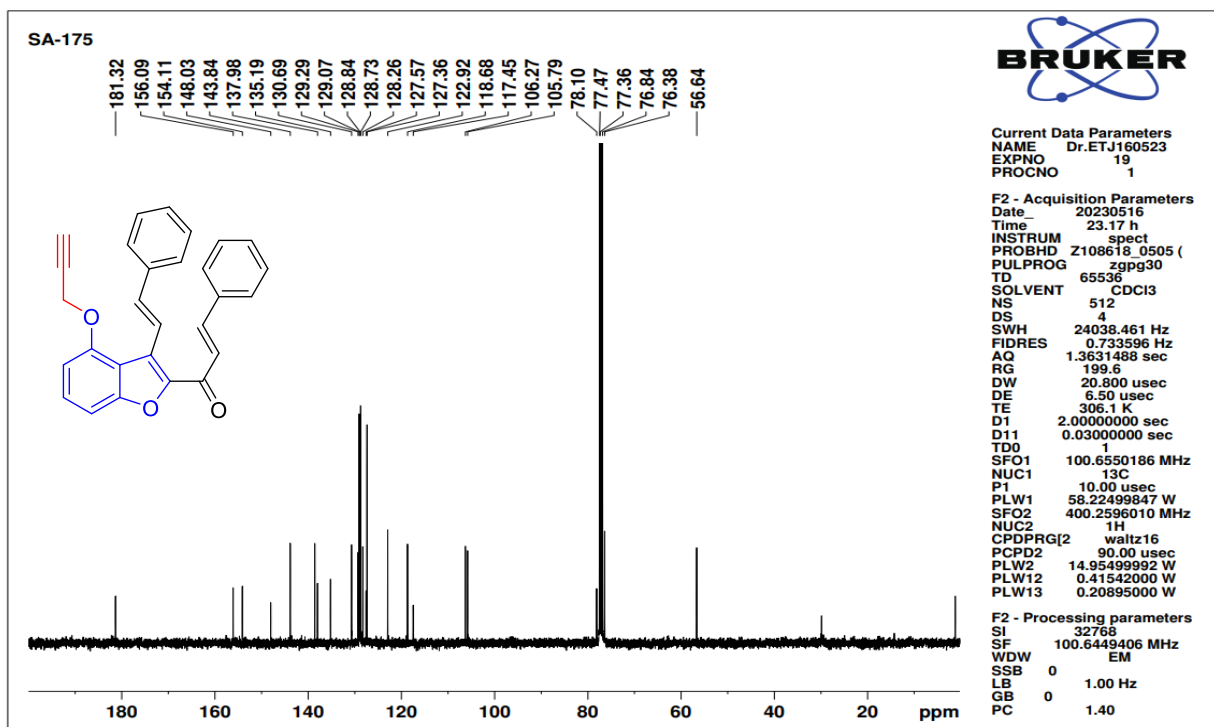Figure 239:  $^{13}\text{C}$ -NMR spectrum of compound 24

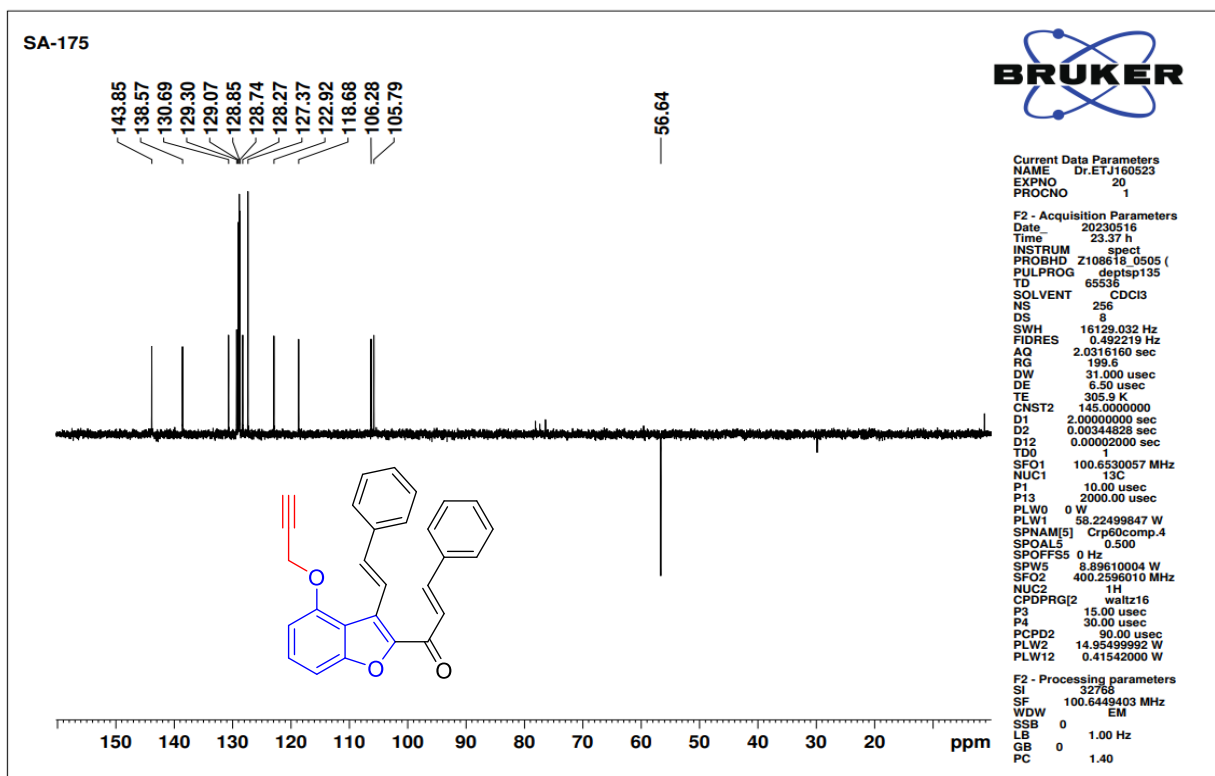

Figure 240: DEPT-135 NMR of compound 24

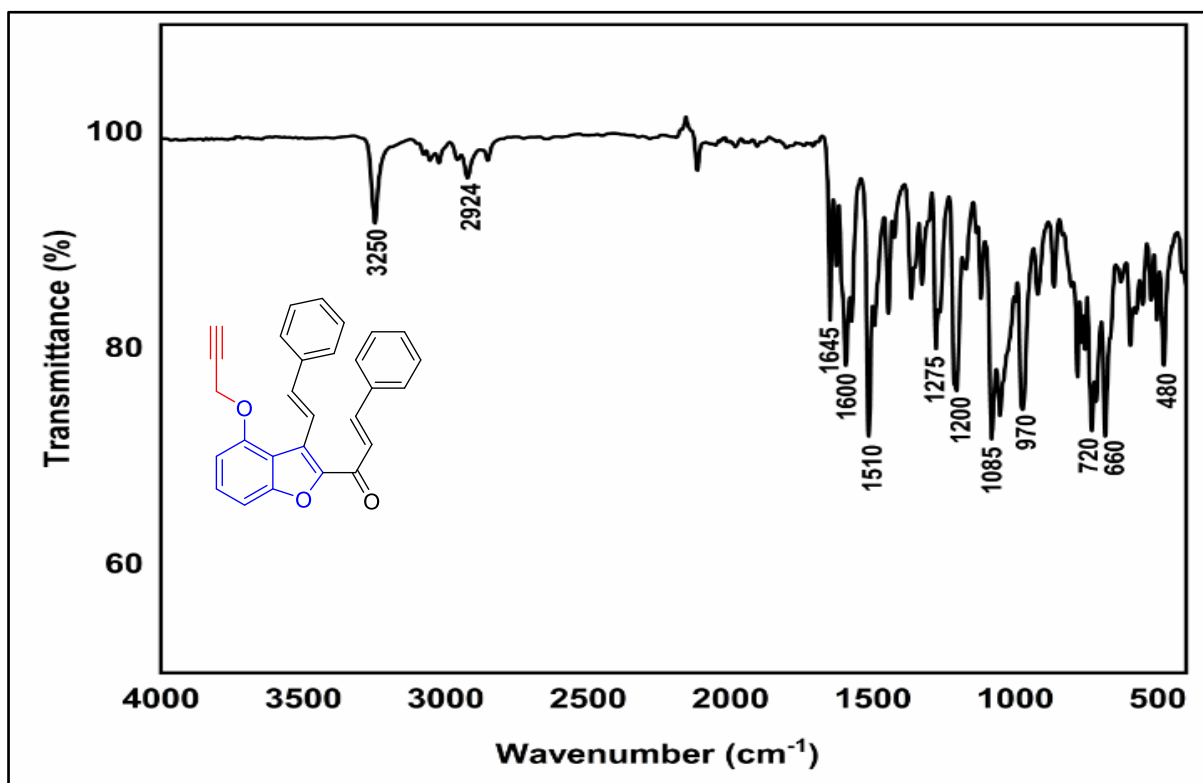

Figure 241: FT-IR spectrum of compound 24

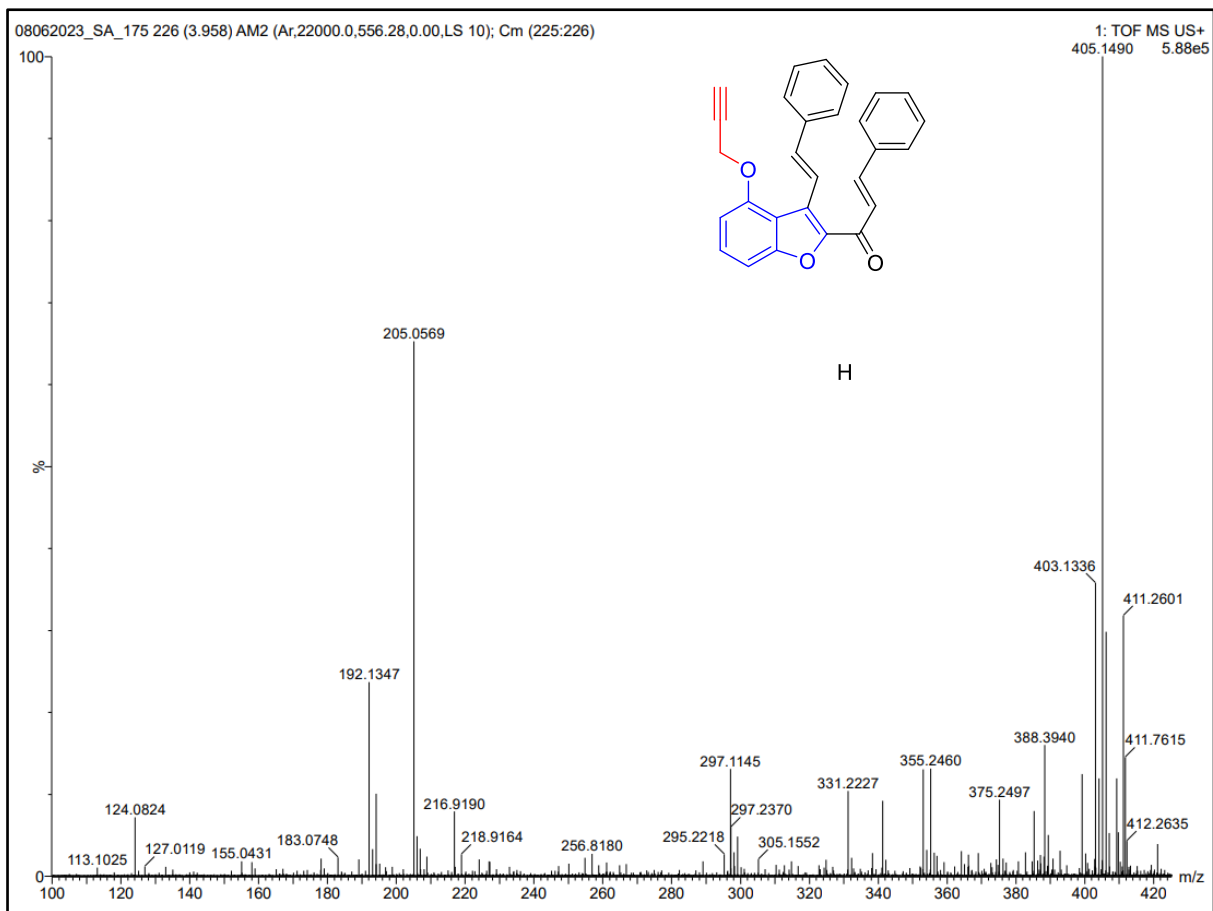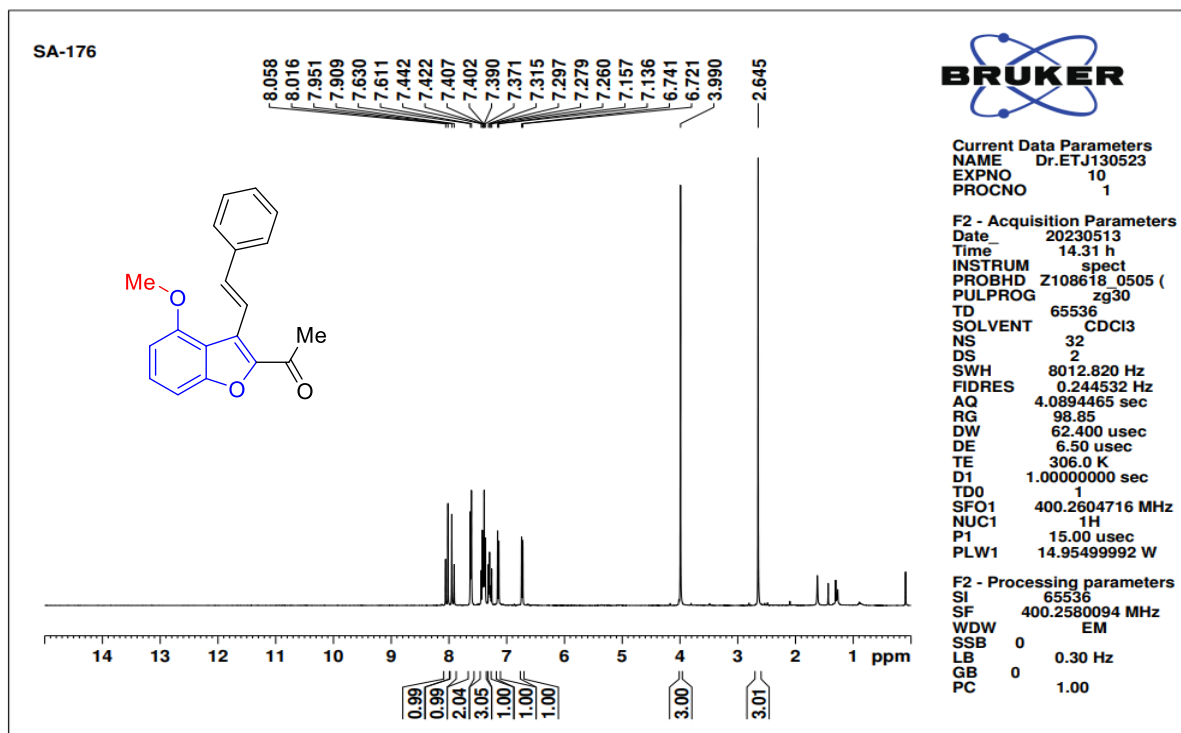

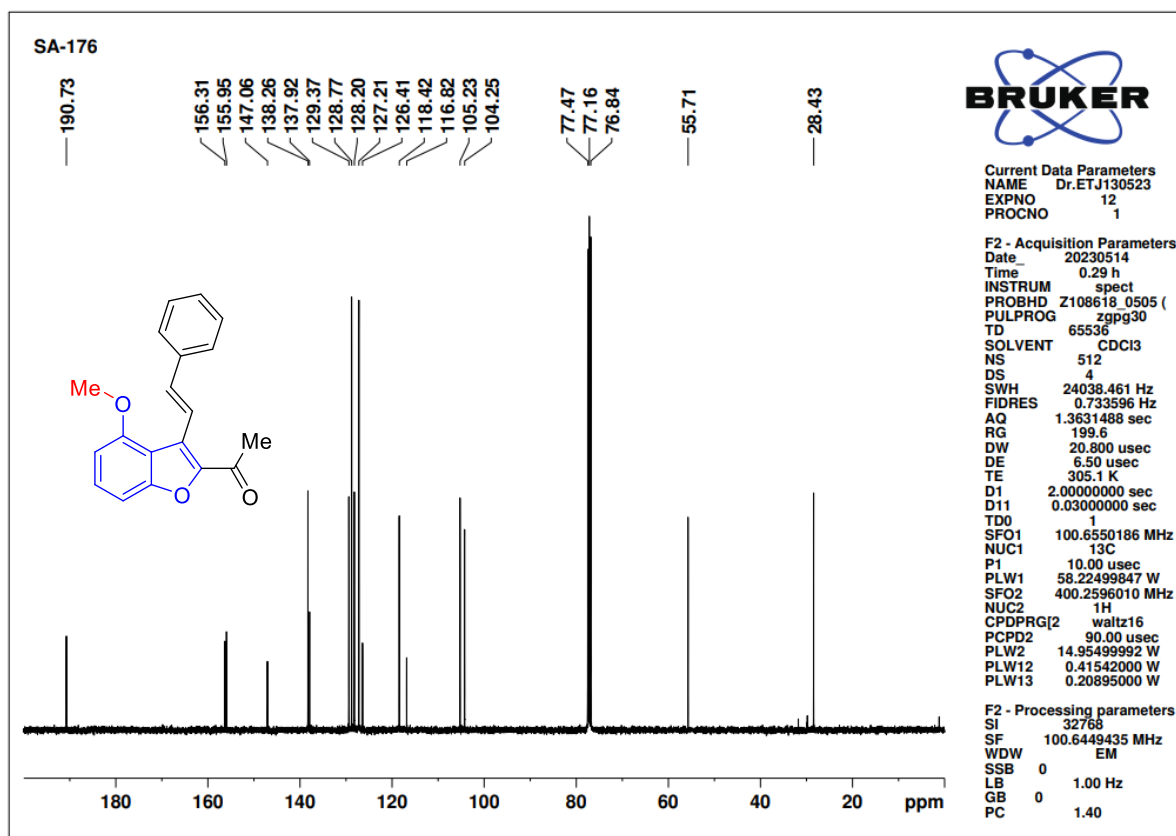Figure 244:  $^{13}\text{C}$ -NMR spectrum of compound 25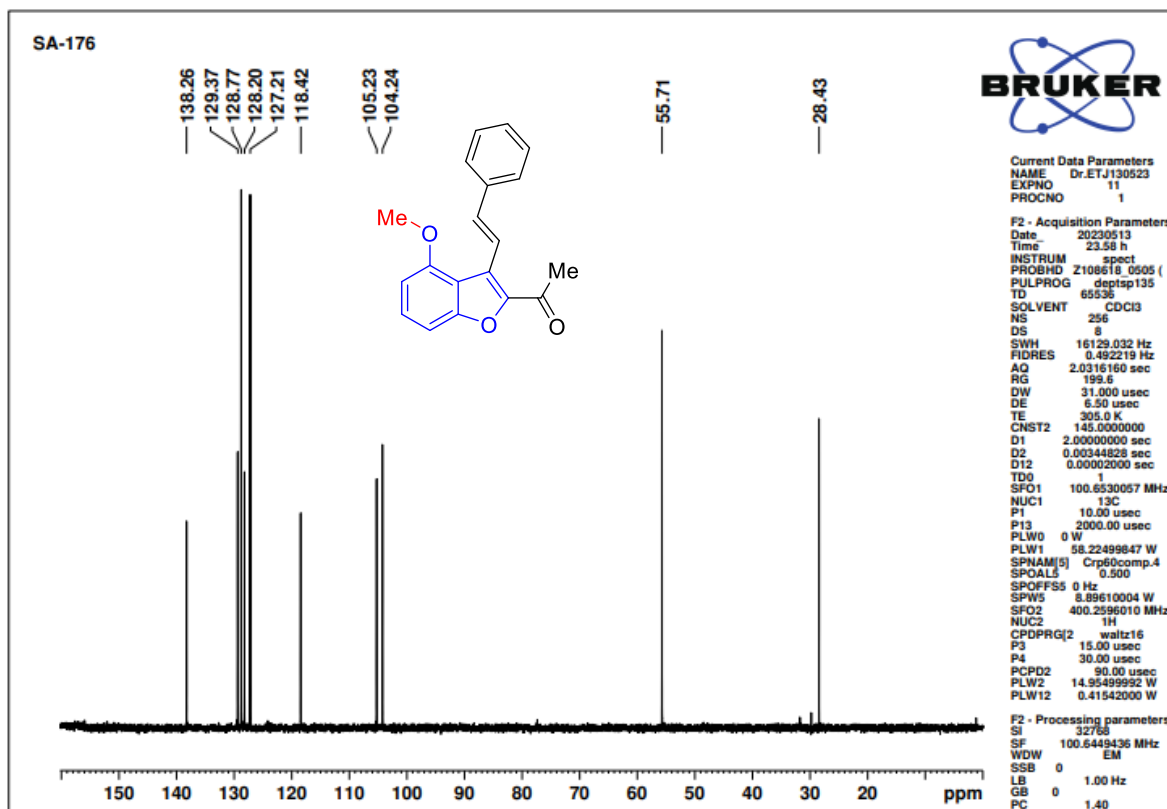

Figure 245: DEPT-135 NMR spectrum of compound 25

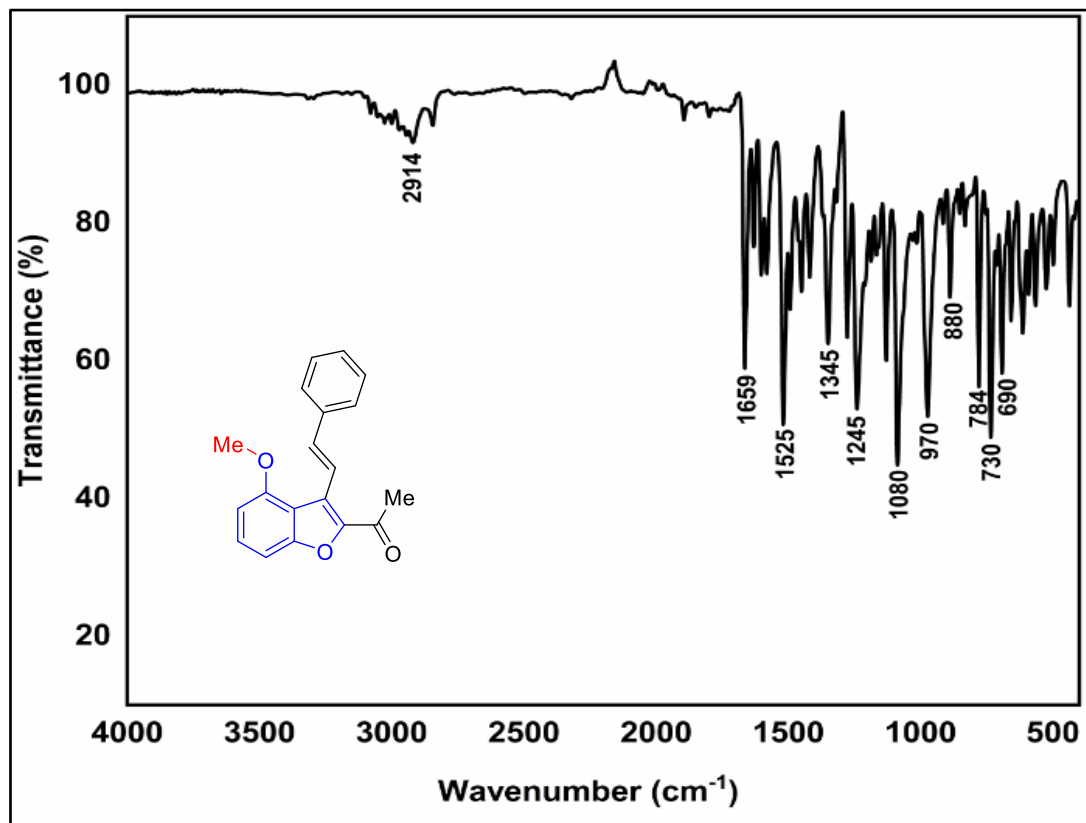

Figure 246: FT-IR spectrum of compound 25

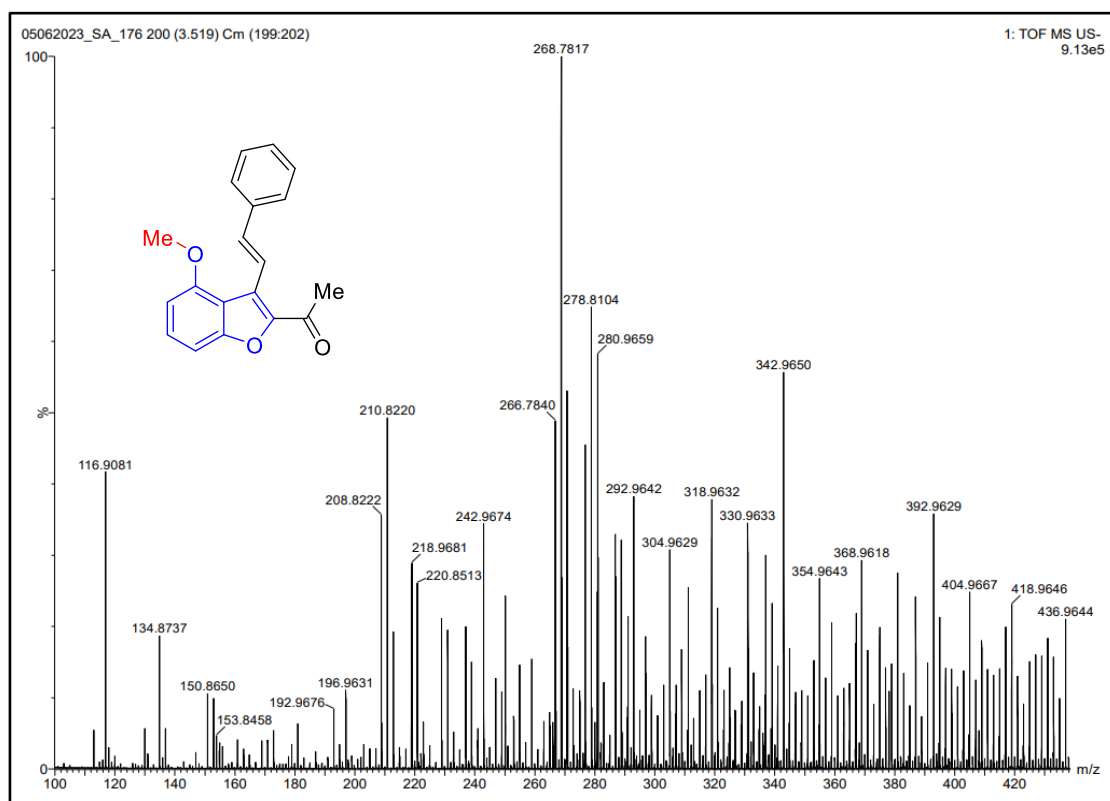

Figure 247: HRMS spectrum of compound 25

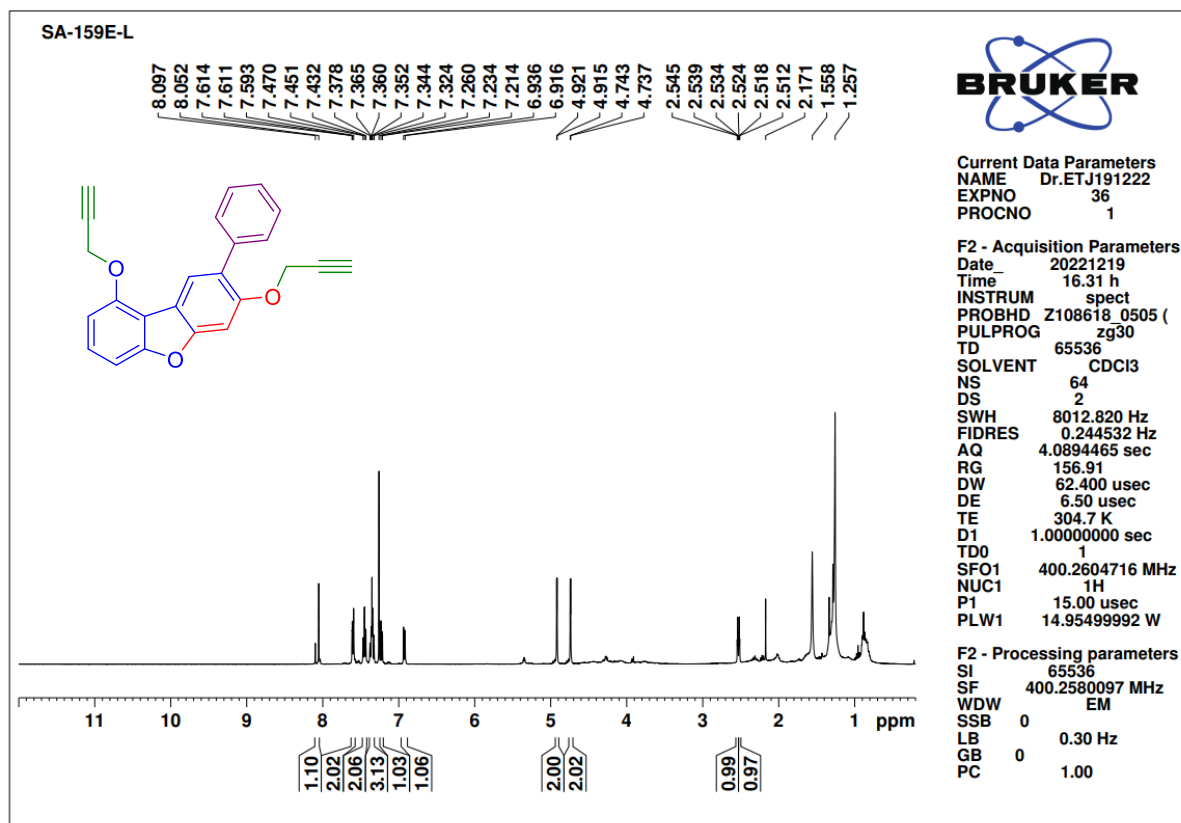Figure 248:  $^1\text{H}$ -NMR spectrum of compound 26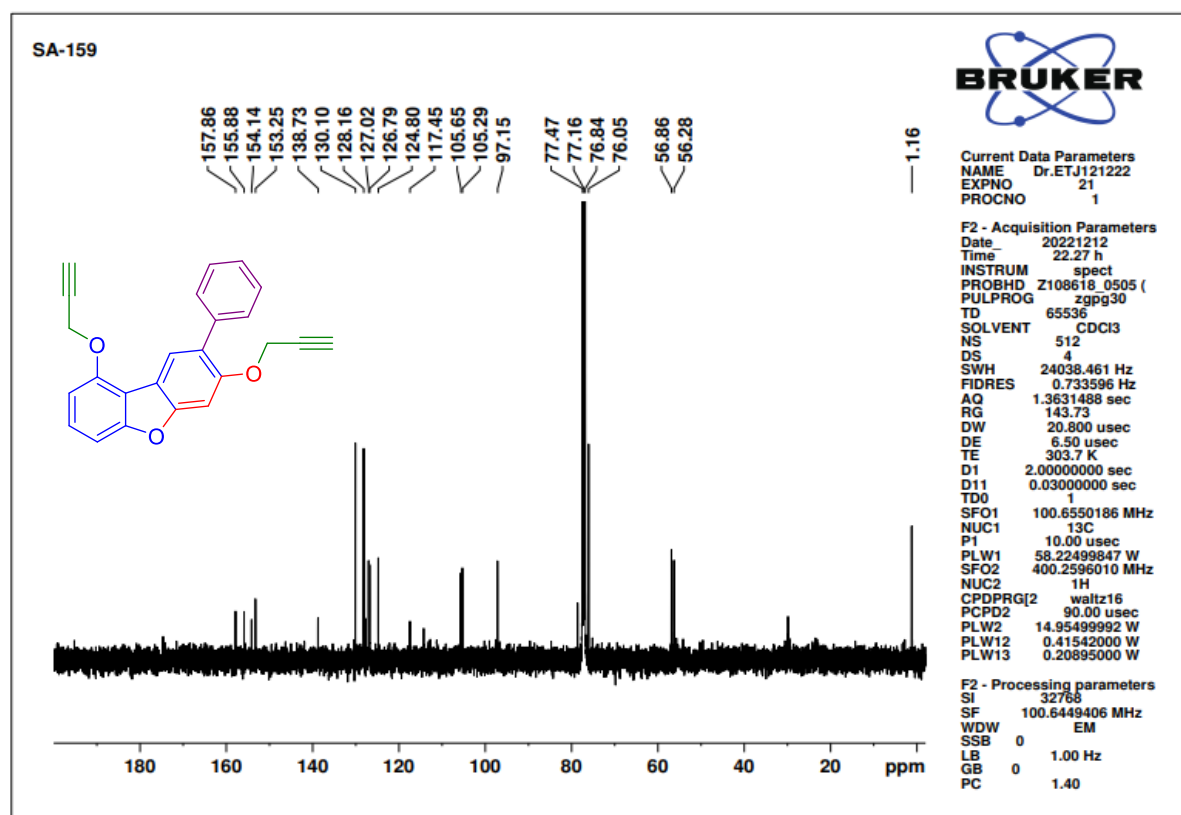Figure 249:  $^{13}\text{C}$ -NMR spectrum of compound 26

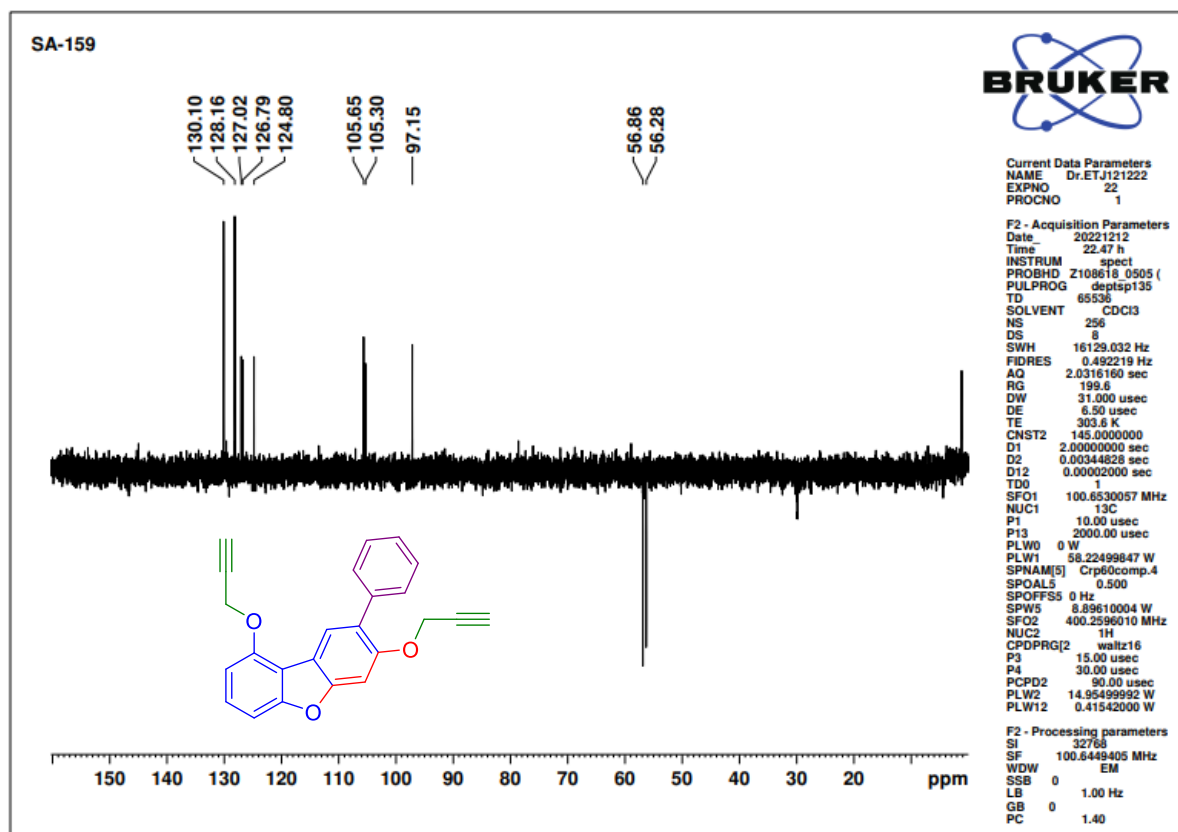

Figure 250: DEPT-135 NMR spectrum of compound 26

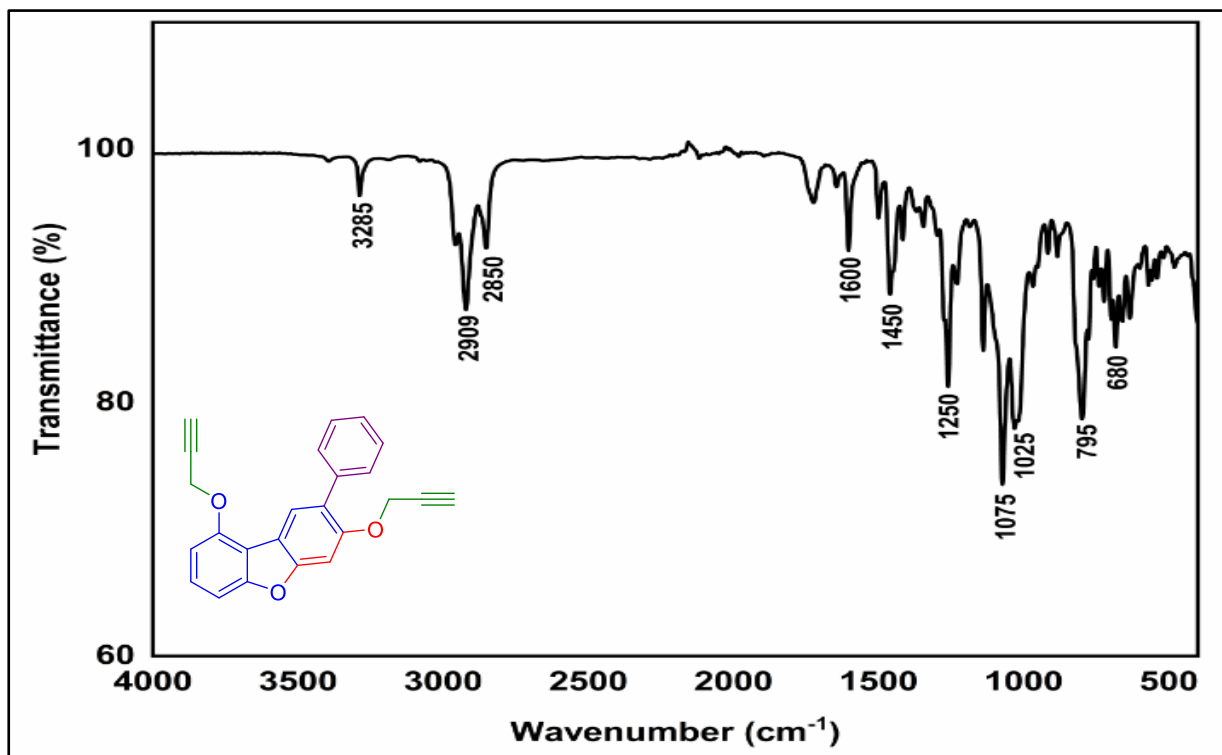

Figure 251: FT-IR spectrum of compound 26

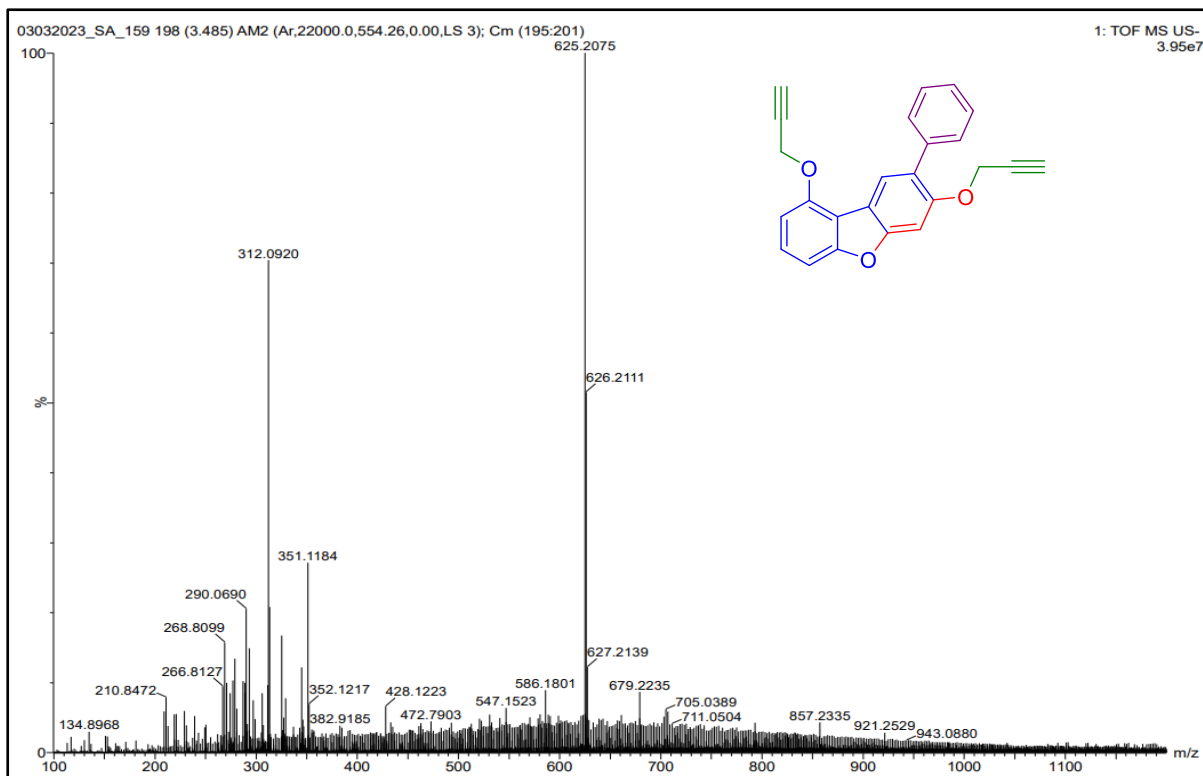

Figure 252: HRMS spectrum of compound 26

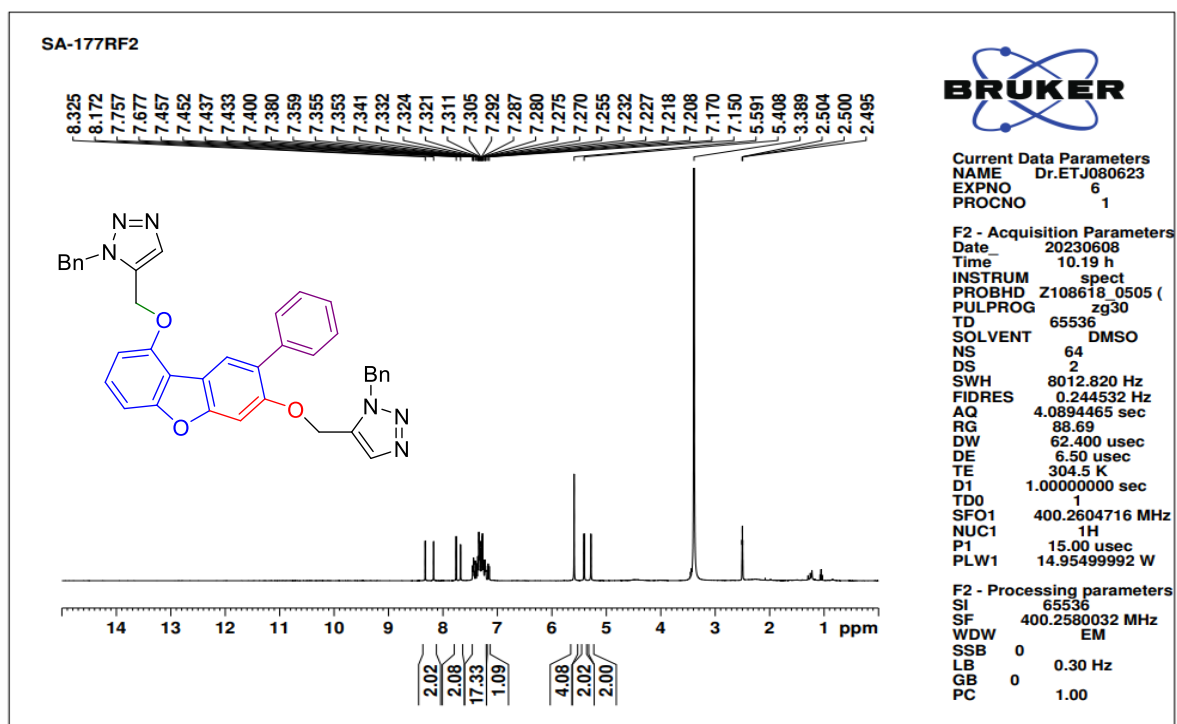Figure 253: <sup>1</sup>H NMR spectrum of compound 27



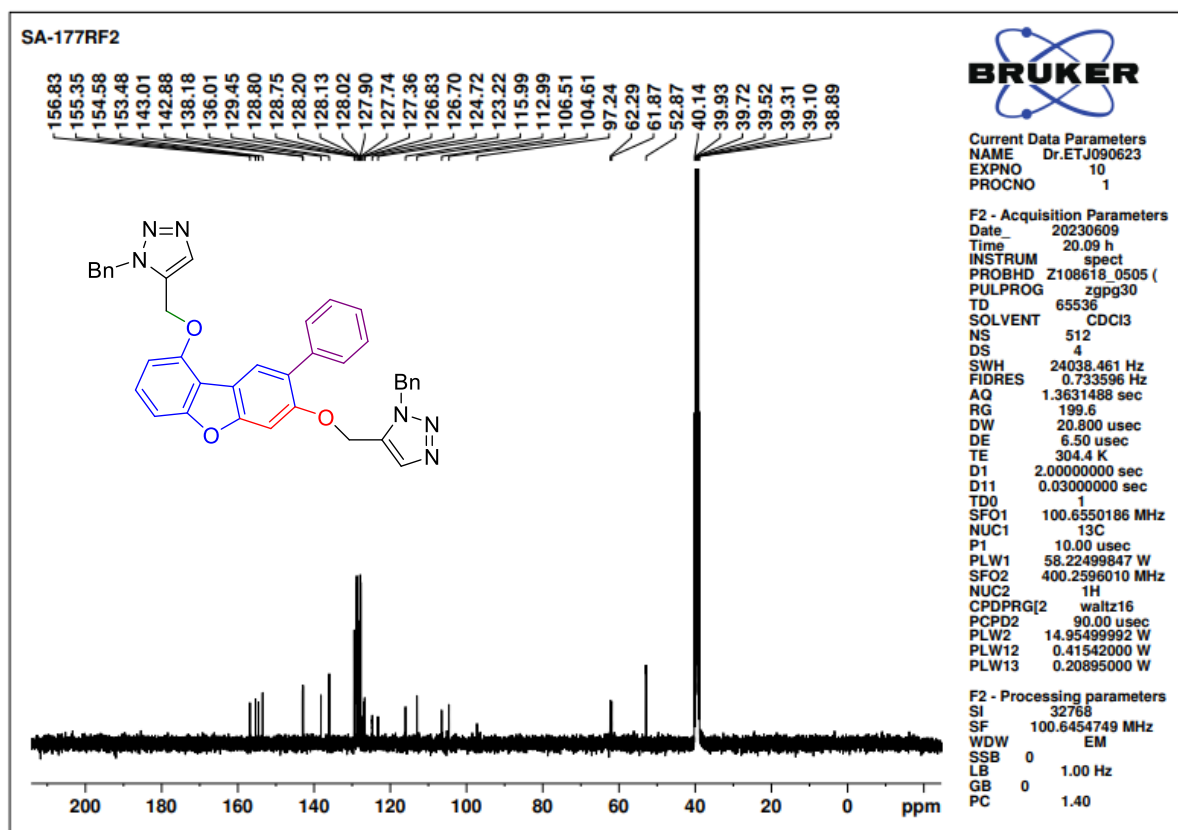Figure 254:  $^{13}\text{C}$  NMR spectrum of compound 27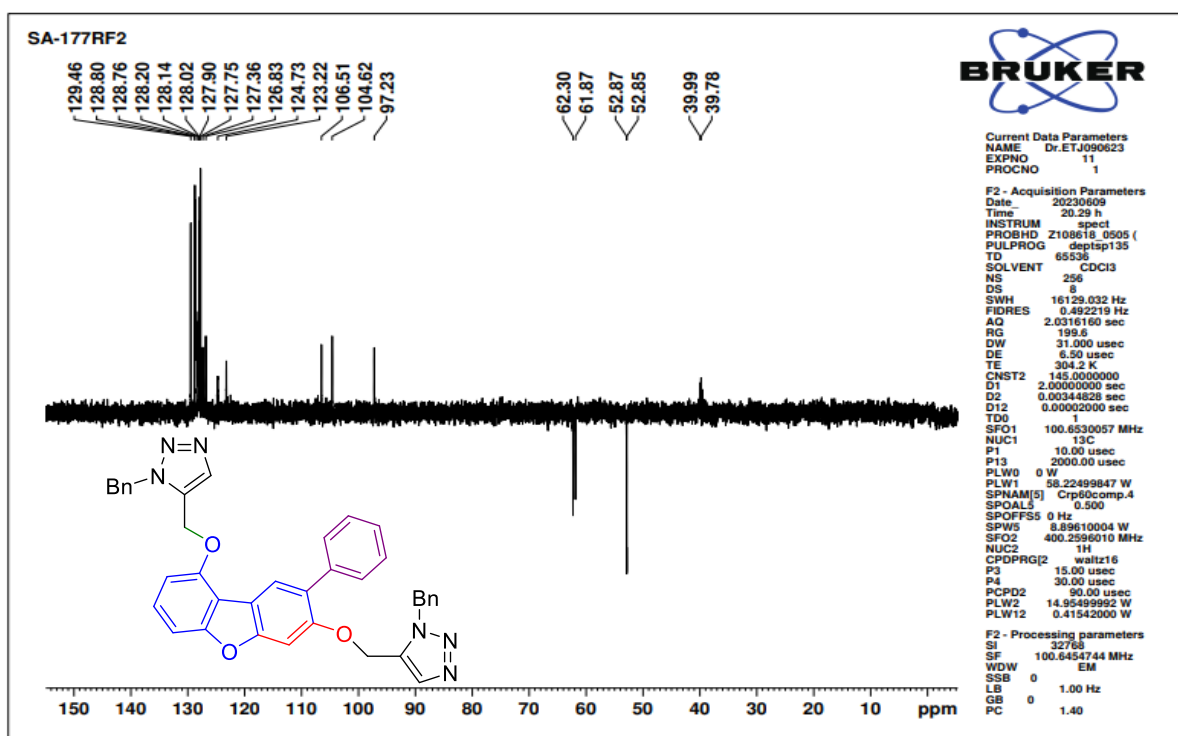

Figure 255: DEPT-135 NMR spectrum of compound 27

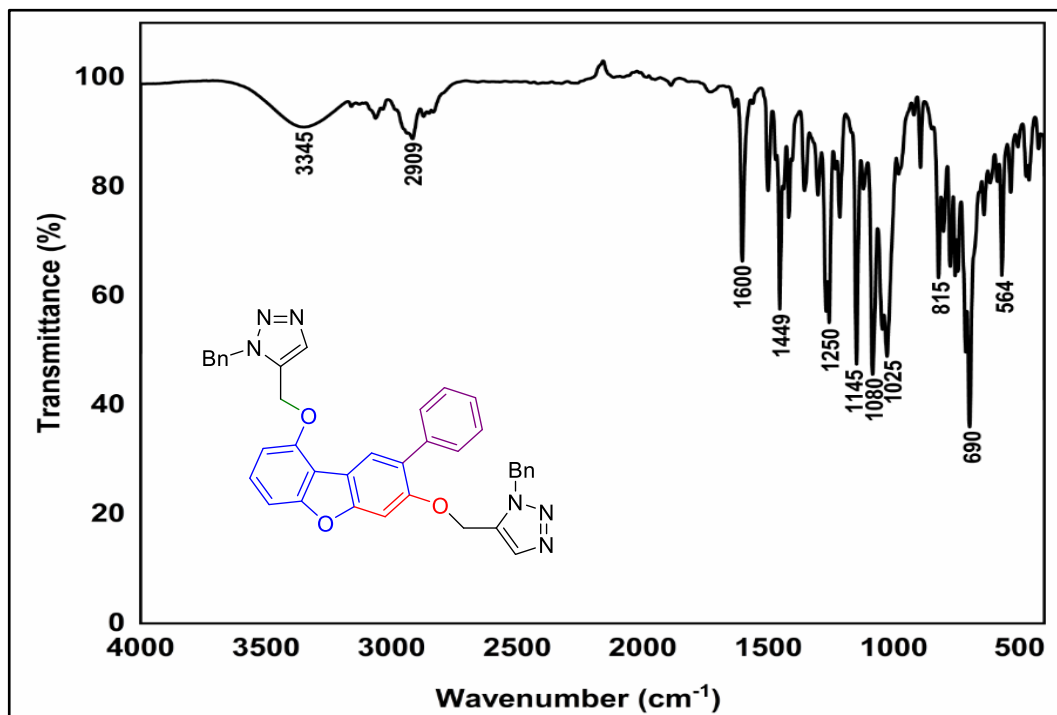

Figure 256: FT-IR spectrum of compound 27

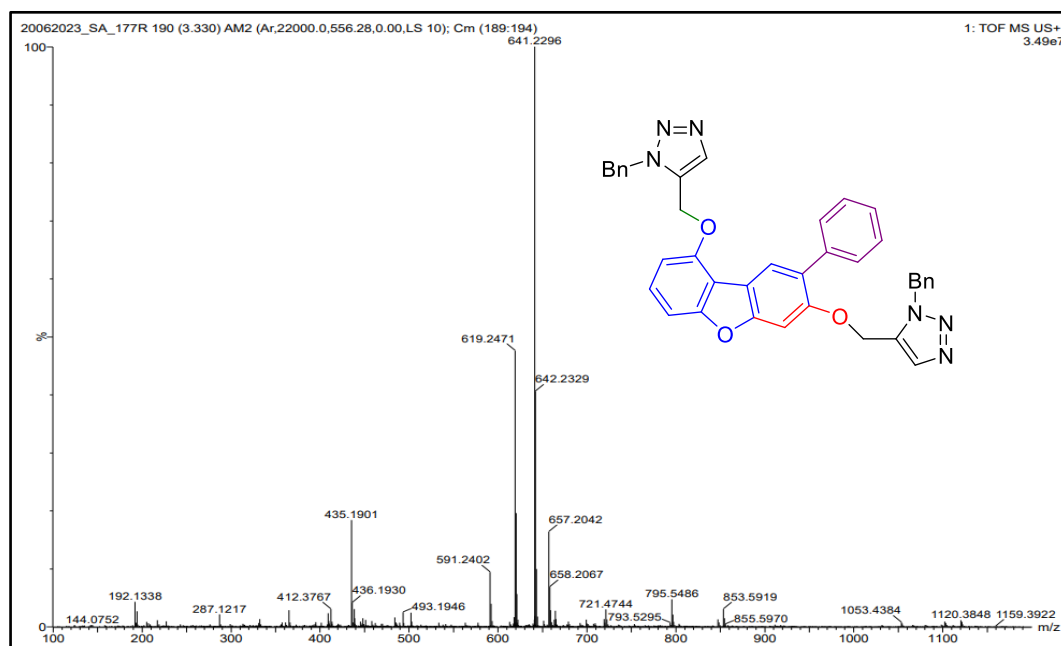

Figure 257: HRMS spectrum of compound 27

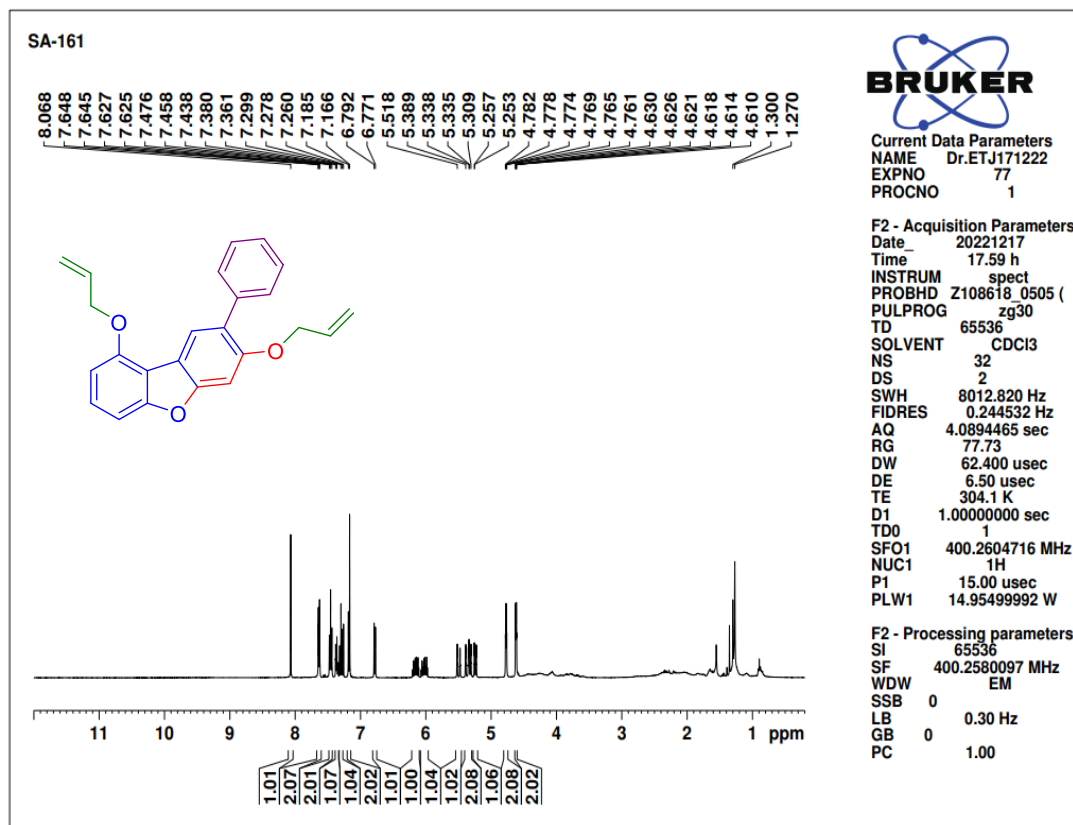Figure 258:  $^1\text{H}$  NMR spectrum of compound 28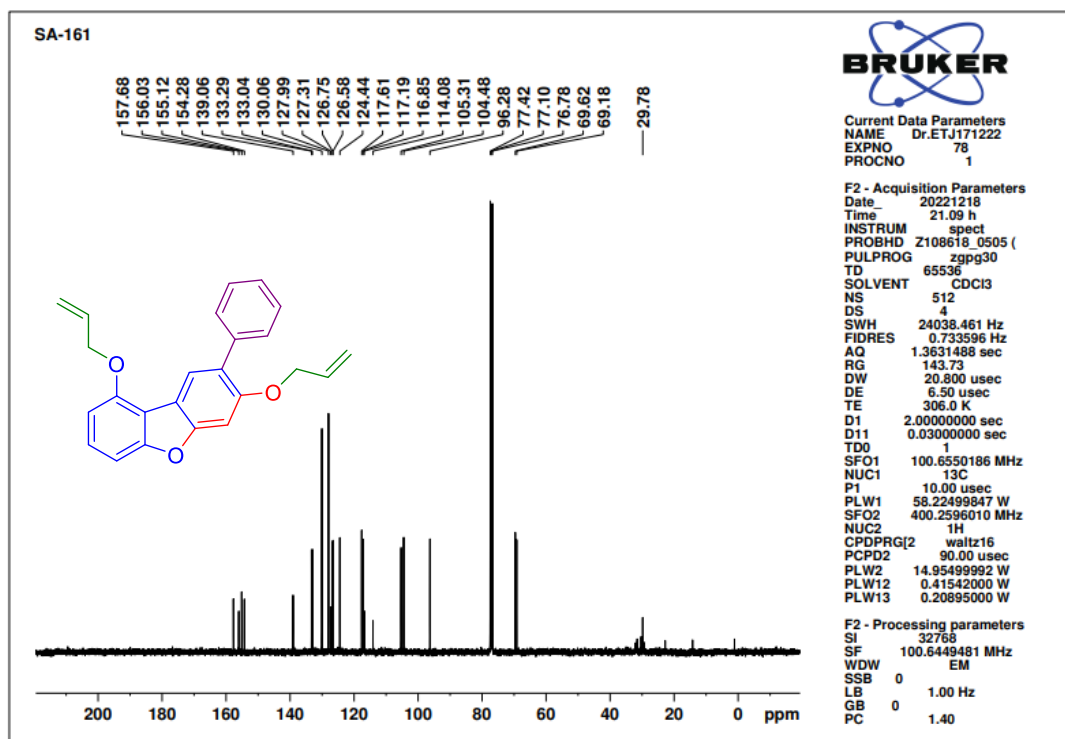Figure 259:  $^{13}\text{C}$  NMR spectrum of compound 28

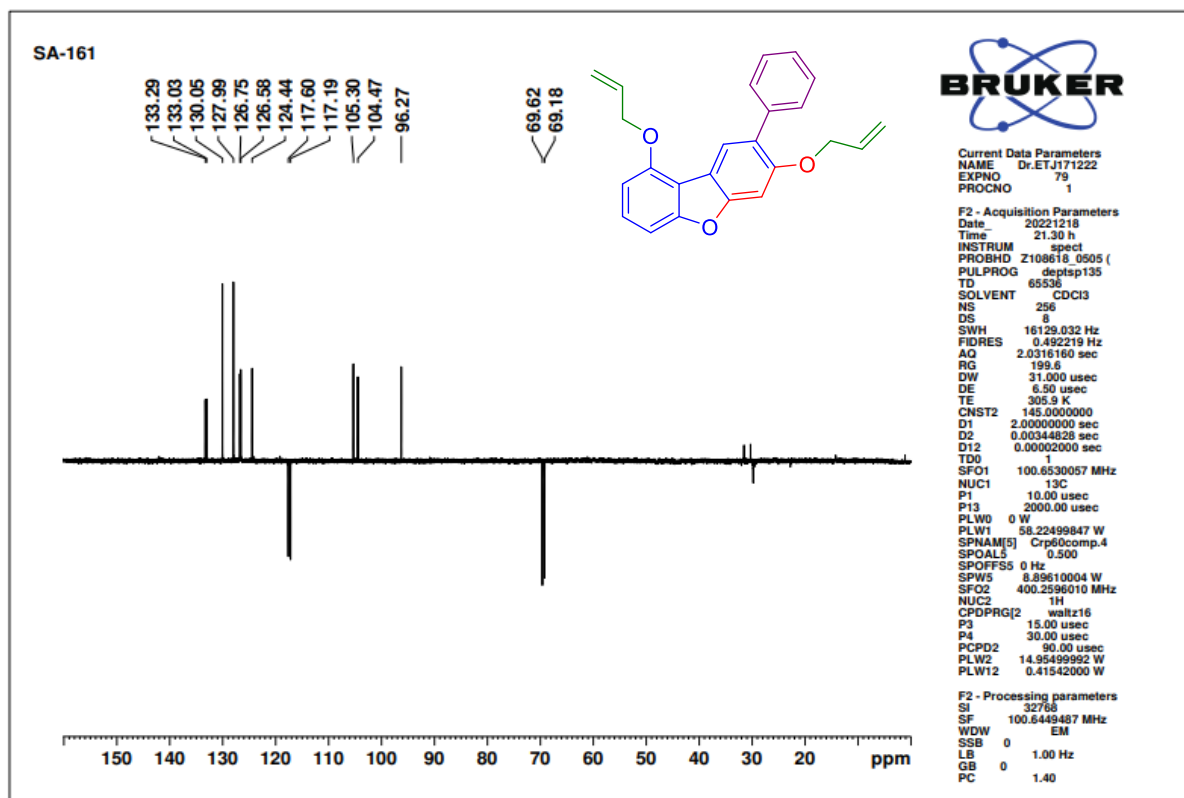

Figure 260: DEPT-135 NMR spectrum of compound 28

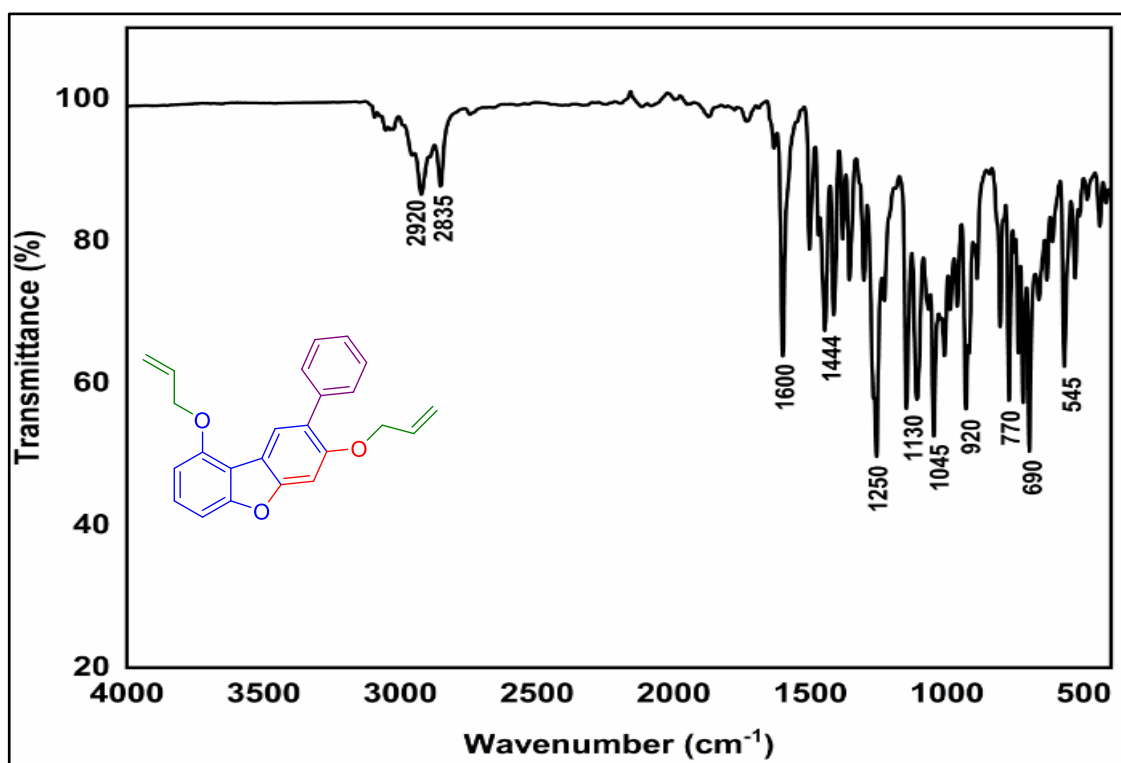

Figure 261: FT-IR spectrum of compound 28

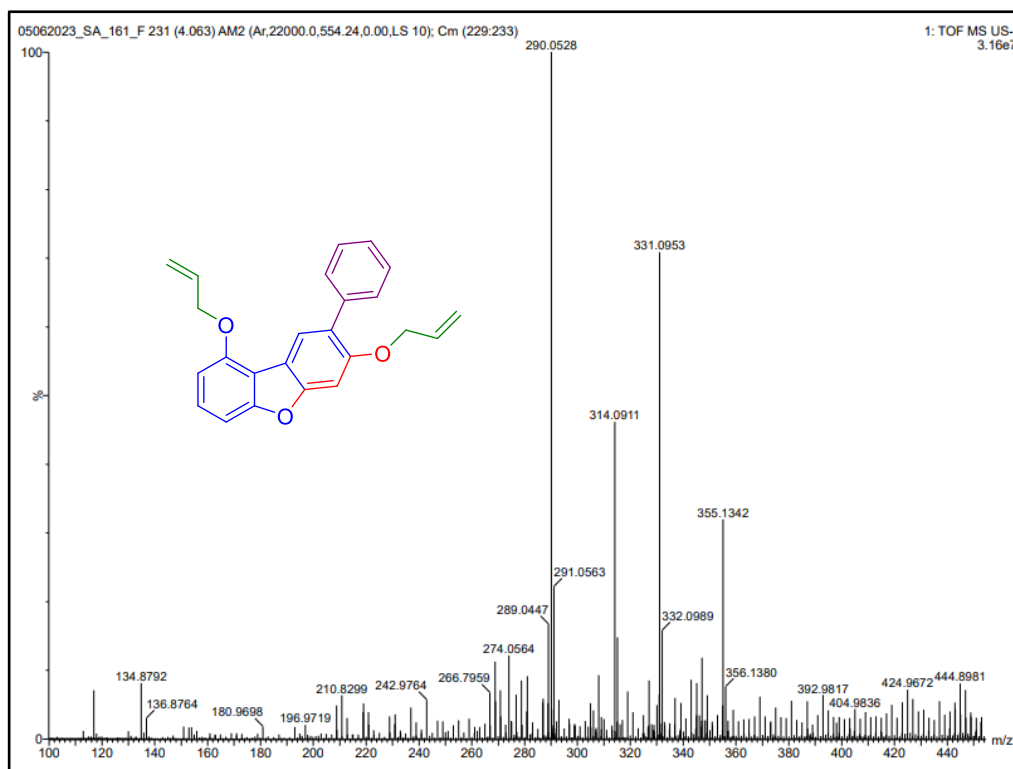

Figure 262: HRMS spectrum of compound 28

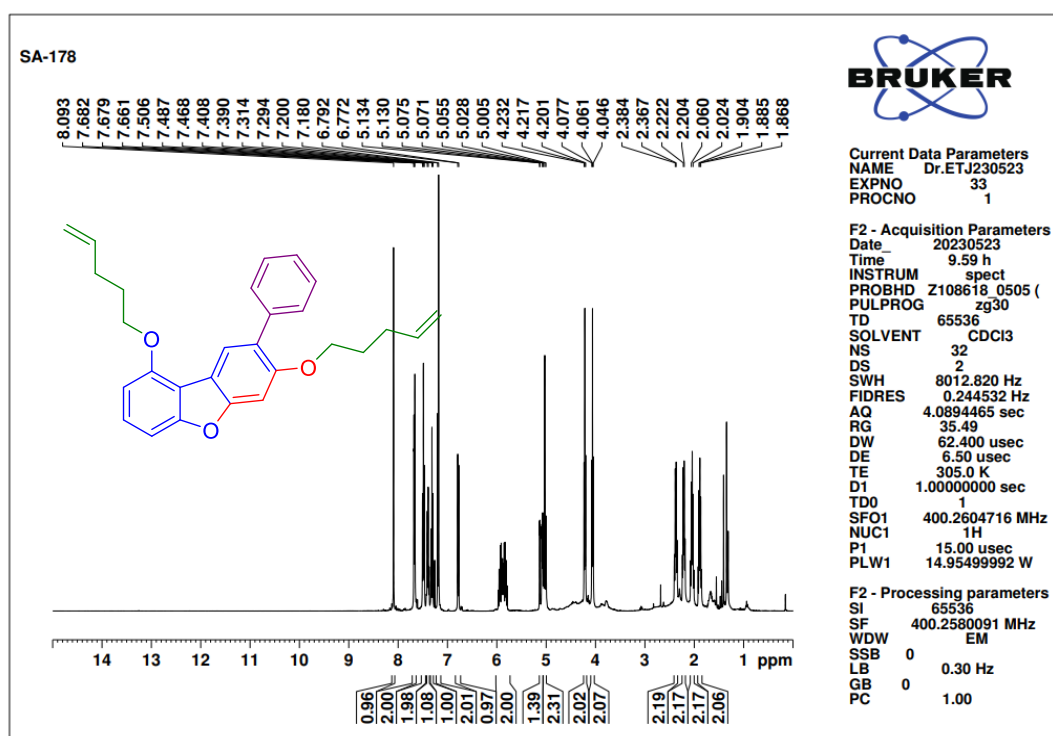Figure 263: <sup>1</sup>H-NMR spectrum of compound 29

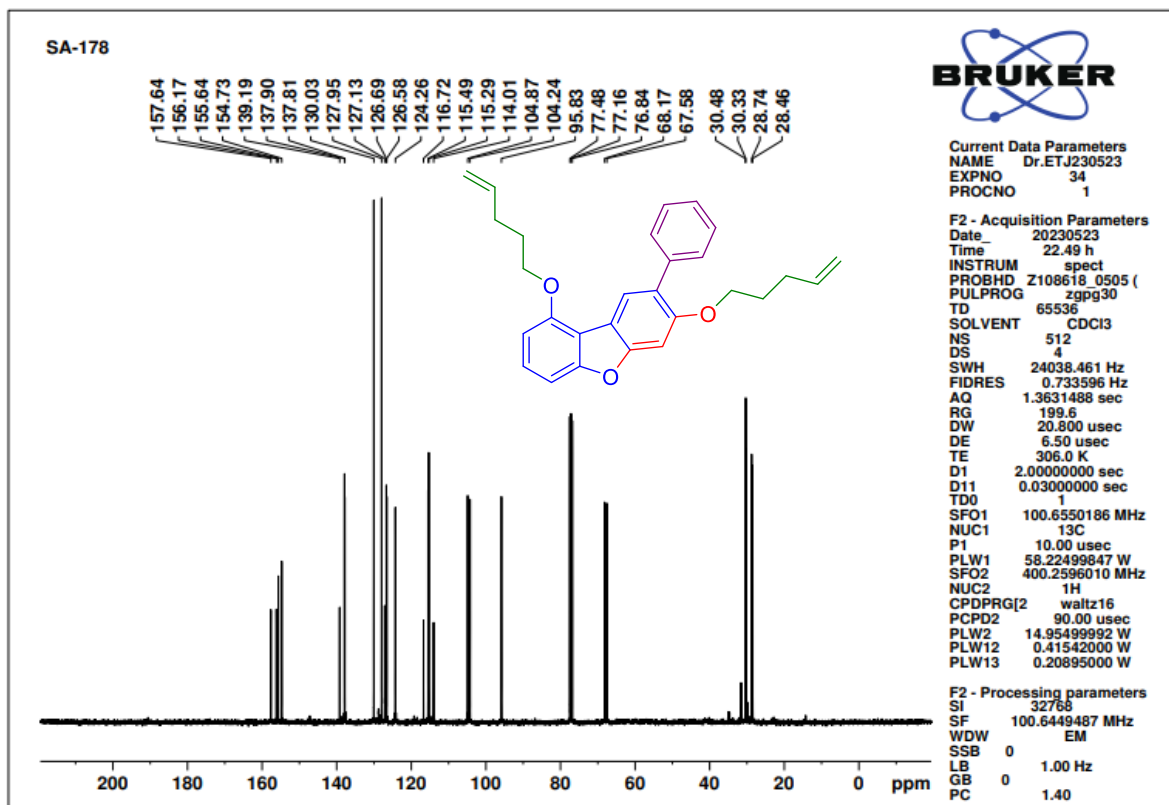Figure 264:  $^{13}\text{C}$ -NMR spectrum of compound 29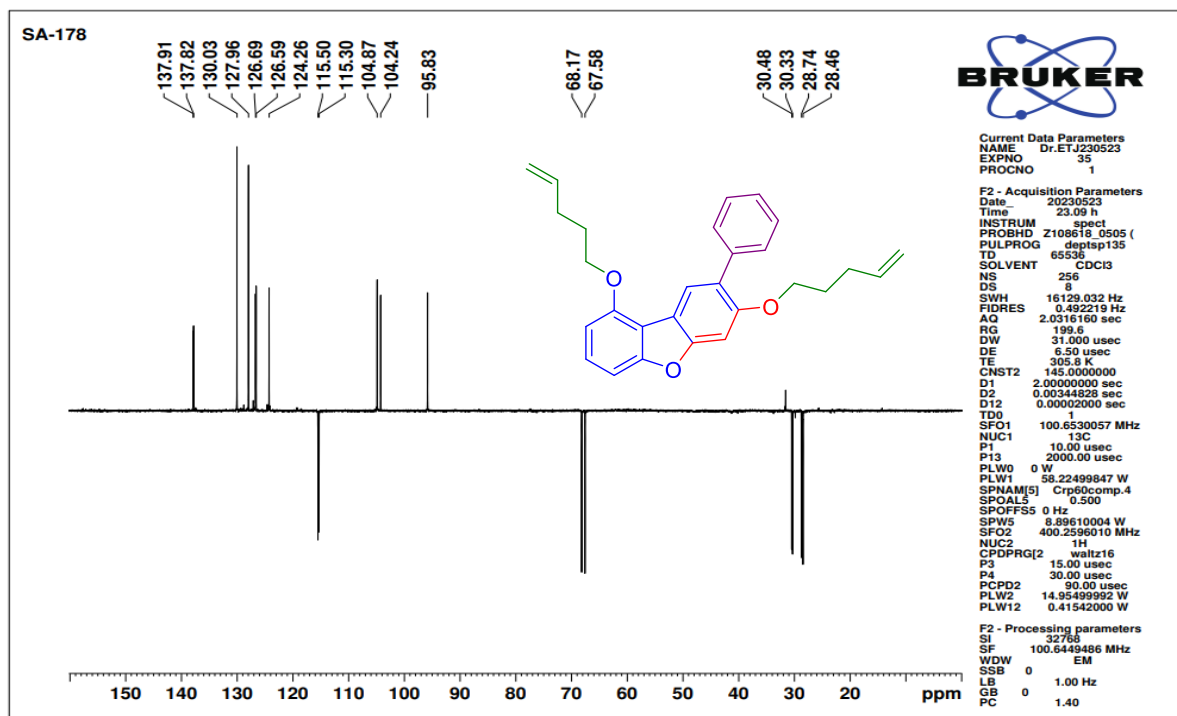

Figure 265: DEPT-135 NMR spectrum of compound 29

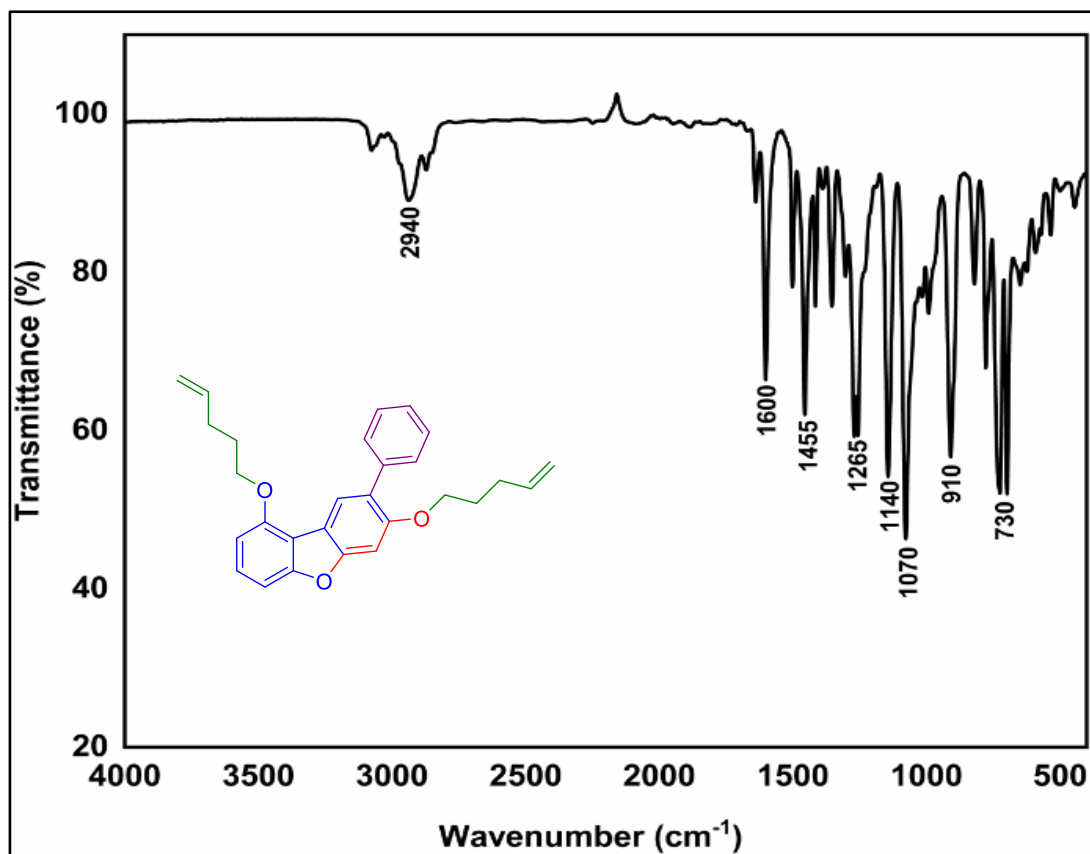

Figure 266: FT-IR spectrum of compound 29

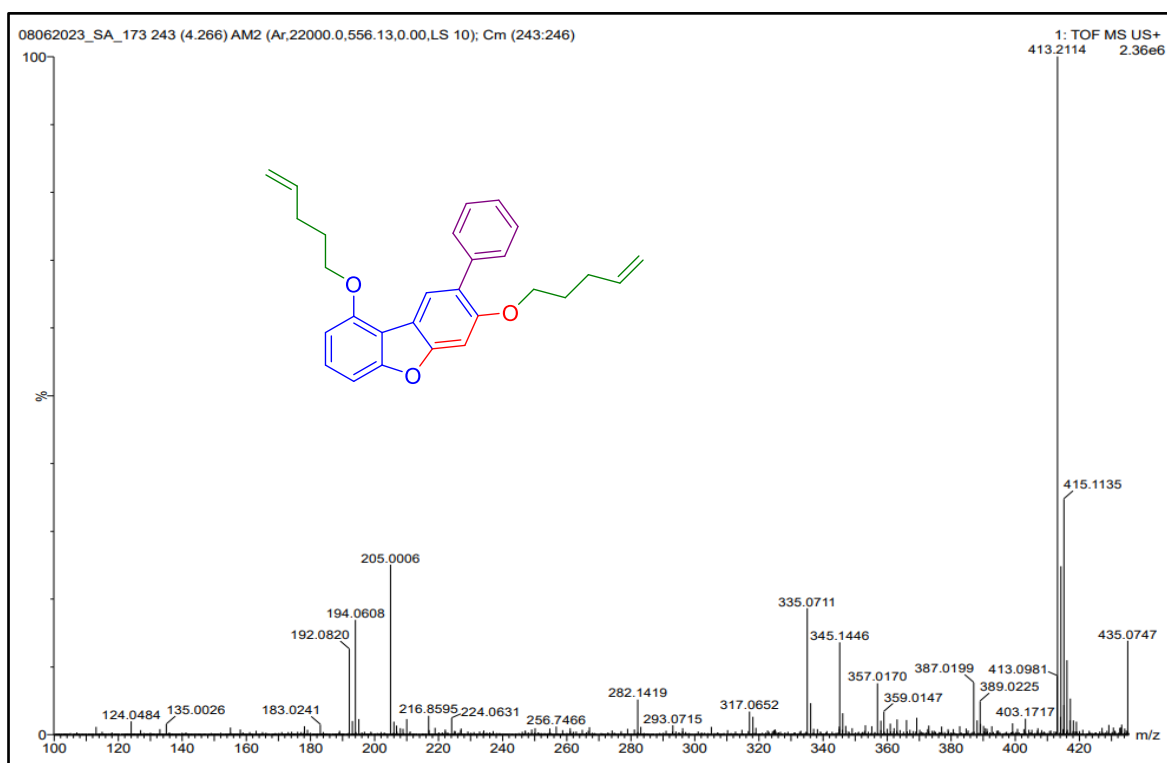

Figure 267: FT-IR spectrum of compound 29

## 5. Basic crystallographic data for compounds **6f**, **7d** and **23**

### Crystal Structure Report for compound **6f**

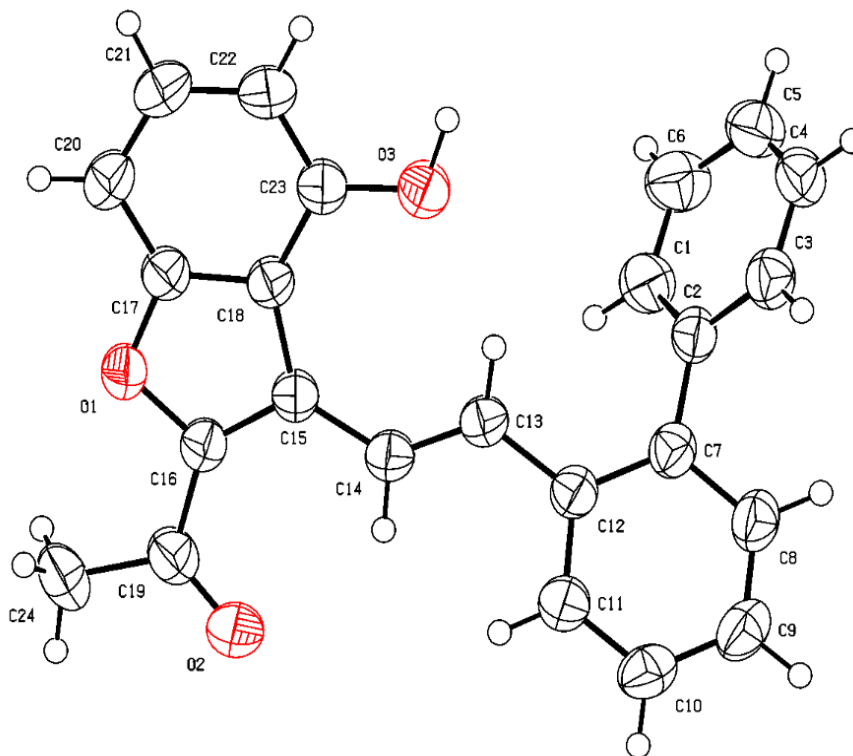

**CCDC NUMBER: 2266920**

A specimen of  $C_{24}H_{18}O_3$ , approximate dimensions 0.117 mm x 0.134 mm x 0.245 mm, was used for the X-ray crystallographic analysis. The X-ray intensity data were measured ( $\lambda = 0.71073 \text{ \AA}$ ).

The integration of the data using a monoclinic unit cell yielded a total of 26560 reflections to a maximum  $\theta$  angle of  $28.31^\circ$  (0.75  $\text{\AA}$  resolution), of which 4550 were independent (average redundancy 5.837, completeness =99.6%,  $R_{\text{int}} = 4.63\%$ ,  $R_{\text{sig}} = 3.94\%$ ) and 2689 (59.10%) were greater than  $2\sigma(F^2)$ . The final cell constants of  $a = 11.3959(7) \text{ \AA}$ ,  $b = 17.1806(10) \text{ \AA}$ ,  $c = 10.1872(7) \text{ \AA}$ ,  $\beta = 113.005(2)^\circ$ , volume =  $1835.9(2) \text{ \AA}^3$ , are based upon the refinement of the XYZ-centroids of reflections above  $20\sigma(I)$ . The calculated minimum and maximum transmission coefficients (based on crystal size) are 0.9800 and 0.9900.



The structure was solved and refined using the Bruker SHELXTL Software Package, using the space group **P 1 21/c 1**, with  $Z = 4$  for the formula unit,  $C_{24}H_{18}O_3$ . The final anisotropic full-matrix least-squares refinement on  $F^2$  with 248 variables converged at  $R1 = 4.90\%$ , for the observed data and  $wR2 = 14.08\%$  for all data. The goodness-of-fit was 1.024. The largest peak in the final difference electron density synthesis was  $0.138 e^-/\text{\AA}^3$  and the largest hole was  $-0.199 e^-/\text{\AA}^3$  with an RMS deviation of  $0.036 e^-/\text{\AA}^3$ . On the basis of the final model, the calculated density was  $1.282 \text{ g/cm}^3$  and  $F(000)$ , 744  $e^-$ .

Table 1. Sample and crystal data for compound **6f**.

|                               |                               |                            |
|-------------------------------|-------------------------------|----------------------------|
| <b>Identification code</b>    | SA151BF1RE                    |                            |
| <b>Chemical formula</b>       | $C_{24}H_{18}O_3$             |                            |
| <b>Formula weight</b>         | 354.38 g/mol                  |                            |
| <b>Temperature</b>            | 300(2) K                      |                            |
| <b>Wavelength</b>             | 0.71073 Å                     |                            |
| <b>Crystal size</b>           | 0.117 x 0.134 x 0.245 mm      |                            |
| <b>Crystal system</b>         | monoclinic                    |                            |
| <b>Space group</b>            | P 1 21/c 1                    |                            |
| <b>Unit cell dimensions</b>   | $a = 11.3959(7) \text{ \AA}$  | $\alpha = 90^\circ$        |
|                               | $b = 17.1806(10) \text{ \AA}$ | $\beta = 113.005(2)^\circ$ |
|                               | $c = 10.1872(7) \text{ \AA}$  | $\gamma = 90^\circ$        |
| <b>Volume</b>                 | $1835.9(2) \text{ \AA}^3$     |                            |
| <b>Z</b>                      | 4                             |                            |
| <b>Density (calculated)</b>   | $1.282 \text{ g/cm}^3$        |                            |
| <b>Absorption coefficient</b> | $0.084 \text{ mm}^{-1}$       |                            |
| <b>F (000)</b>                | 744                           |                            |

Table 2. Data collection and structure refinement for compound **6f**.

|                                        |                |
|----------------------------------------|----------------|
| <b>Theta range for data collection</b> | 2.27 to 28.31° |
|----------------------------------------|----------------|

|                                         |                                                                                                                             |
|-----------------------------------------|-----------------------------------------------------------------------------------------------------------------------------|
| <b>Index ranges</b>                     | -15<=h<=13, -22<=k<=20, -13<=l<=13                                                                                          |
| <b>Reflections collected</b>            | 26560                                                                                                                       |
| <b>Independent reflections</b>          | 4550 [R(int) = 0.0463]                                                                                                      |
| <b>Max. and min. transmission</b>       | 0.9900 and 0.9800                                                                                                           |
| <b>Structure solution technique</b>     | direct methods                                                                                                              |
| <b>Structure solution program</b>       | SHELXT 2018/2 (Sheldrick, 2018)                                                                                             |
| <b>Refinement method</b>                | Full-matrix least-squares on F <sup>2</sup>                                                                                 |
| <b>Refinement program</b>               | SHELXL-2018/3 (Sheldrick, 2018)                                                                                             |
| <b>Function minimized</b>               | $\Sigma w (F_o^2 - F_c^2)^2$                                                                                                |
| <b>Data / restraints / parameters</b>   | 4550 / 0 / 248                                                                                                              |
| <b>Goodness-of-fit on F<sup>2</sup></b> | 1.024                                                                                                                       |
| <b>Final R indices</b>                  | 2689 data; I>2 $\sigma$ (I)    R1 = 0.0490, wR2 = 0.1070                                                                    |
|                                         | all data                    R1 = 0.1001, wR2 = 0.1408                                                                       |
| <b>Weighting scheme</b>                 | w=1/[ $\sigma^2(F_o^2) + (0.0508P)^2 + 0.5371P$ ]<br>where P=(F <sub>o</sub> <sup>2</sup> +2F <sub>c</sub> <sup>2</sup> )/3 |
| <b>Largest diff. peak and hole</b>      | 0.138 and -0.199 eÅ <sup>-3</sup>                                                                                           |
| <b>R.M.S. deviation from mean</b>       | 0.036 eÅ <sup>-3</sup>                                                                                                      |

Table 3. Atomic coordinates and equivalent isotropic atomic displacement parameters (Å<sup>2</sup>) for compound **6f**.

U(eq) is defined as one third of the trace of the orthogonalized U<sub>ij</sub> tensor.

|     | <b>x/a</b>  | <b>y/b</b>  | <b>z/c</b>  | <b>U(eq)</b> |
|-----|-------------|-------------|-------------|--------------|
| O1  | 0.69410(11) | 0.47727(7)  | 0.02448(13) | 0.0542(3)    |
| O2  | 0.58927(15) | 0.32554(8)  | 0.77378(16) | 0.0793(5)    |
| O3  | 0.42273(15) | 0.66664(8)  | 0.73465(15) | 0.0774(5)    |
| C1  | 0.08381(19) | 0.58691(11) | 0.5324(2)   | 0.0591(5)    |
| C2  | 0.09743(16) | 0.58935(10) | 0.40268(17) | 0.0468(4)    |
| C3  | 0.04860(17) | 0.65399(11) | 0.31615(19) | 0.0547(5)    |
| C4  | 0.98571(18) | 0.71206(11) | 0.3553(2)   | 0.0600(5)    |
| C5  | 0.97018(19) | 0.70742(12) | 0.4817(2)   | 0.0644(5)    |
| C6  | 0.0208(2)   | 0.64521(13) | 0.5706(2)   | 0.0695(6)    |
| C7  | 0.14954(17) | 0.52239(10) | 0.34976(17) | 0.0461(4)    |
| C8  | 0.07439(19) | 0.49328(11) | 0.21497(18) | 0.0559(5)    |
| C9  | 0.1104(2)   | 0.42890(11) | 0.15928(19) | 0.0591(5)    |
| C10 | 0.22325(19) | 0.39188(11) | 0.23783(19) | 0.0553(5)    |
| C11 | 0.29945(18) | 0.41996(10) | 0.37068(19) | 0.0523(5)    |
| C12 | 0.26556(16) | 0.48535(10) | 0.43014(17) | 0.0446(4)    |
| C13 | 0.35151(16) | 0.51548(10) | 0.56966(18) | 0.0480(4)    |
| C14 | 0.44184(17) | 0.47374(10) | 0.66663(18) | 0.0504(4)    |
| C15 | 0.53316(16) | 0.49601(9)  | 0.80636(18) | 0.0453(4)    |
| C16 | 0.61872(16) | 0.44379(10) | 0.89579(18) | 0.0496(4)    |
| C17 | 0.65652(16) | 0.55296(10) | 0.01675(19) | 0.0493(4)    |
| C18 | 0.55830(16) | 0.56871(9)  | 0.88538(18) | 0.0451(4)    |
| C19 | 0.64560(19) | 0.36197(11) | 0.8837(2)   | 0.0610(5)    |
| C20 | 0.71226(19) | 0.60572(12) | 0.1253(2)   | 0.0633(5)    |
| C21 | 0.6658(2)   | 0.67976(12) | 0.0982(2)   | 0.0745(6)    |
| C22 | 0.5693(2)   | 0.69990(12) | 0.9688(2)   | 0.0709(6)    |
| C23 | 0.51522(18) | 0.64612(10) | 0.8618(2)   | 0.0563(5)    |
| C24 | 0.7445(2)   | 0.32347(13) | 0.0100(3)   | 0.0898(8)    |

Table 4. Bond lengths (Å) for compound **6f**.

|          |          |          |          |
|----------|----------|----------|----------|
| O1-C17   | 1.362(2) | O1-C16   | 1.381(2) |
| O2-C19   | 1.223(2) | O3-C23   | 1.358(2) |
| O3-H1B   | 0.98(3)  | C1-C6    | 1.375(3) |
| C1-C2    | 1.390(3) | C1-H1    | 0.930000 |
| C2-C3    | 1.392(2) | C2-C7    | 1.489(2) |
| C3-C4    | 1.375(3) | C3-H3    | 0.930000 |
| C4-C5    | 1.369(3) | C4-H4    | 0.930000 |
| C5-C6    | 1.374(3) | C5-H5    | 0.930000 |
| C6-H6    | 0.930000 | C7-C8    | 1.396(2) |
| C7-C12   | 1.406(2) | C8-C9    | 1.377(3) |
| C8-H8    | 0.930000 | C9-C10   | 1.377(3) |
| C9-H9    | 0.930000 | C10-C11  | 1.378(2) |
| C10-H10  | 0.930000 | C11-C12  | 1.400(2) |
| C11-H11  | 0.930000 | C12-C13  | 1.469(2) |
| C13-C14  | 1.325(2) | C13-H13  | 0.930000 |
| C14-C15  | 1.448(2) | C14-H14  | 0.930000 |
| C15-C16  | 1.375(2) | C15-C18  | 1.453(2) |
| C16-C19  | 1.454(3) | C17-C20  | 1.378(3) |
| C17-C18  | 1.395(2) | C18-C23  | 1.405(2) |
| C19-C24  | 1.494(3) | C20-C21  | 1.364(3) |
| C20-H20  | 0.930000 | C21-C22  | 1.391(3) |
| C21-H21  | 0.930000 | C22-C23  | 1.377(3) |
| C22-H22  | 0.930000 | C24-H24A | 0.960000 |
| C24-H24B | 0.960000 | C24-H24C | 0.960000 |

Table 5. Bond angles (°) for compound **6f**.

|             |            |             |            |
|-------------|------------|-------------|------------|
| C17-O1-C16  | 106.13(13) | C23-O3-H1B  | 110.5(15)  |
| C6-C1-C2    | 120.80(18) | C6-C1-H1    | 119.600000 |
| C2-C1-H1    | 119.600000 | C1-C2-C3    | 117.44(17) |
| C1-C2-C7    | 121.96(16) | C3-C2-C7    | 120.30(16) |
| C4-C3-C2    | 121.33(18) | C4-C3-H3    | 119.300000 |
| C2-C3-H3    | 119.300000 | C5-C4-C3    | 120.27(18) |
| C5-C4-H4    | 119.900000 | C3-C4-H4    | 119.900000 |
| C4-C5-C6    | 119.4(2)   | C4-C5-H5    | 120.300000 |
| C6-C5-H5    | 120.300000 | C5-C6-C1    | 120.7(2)   |
| C5-C6-H6    | 119.600000 | C1-C6-H6    | 119.600000 |
| C8-C7-C12   | 119.10(17) | C8-C7-C2    | 117.04(15) |
| C12-C7-C2   | 123.79(15) | C9-C8-C7    | 121.73(18) |
| C9-C8-H8    | 119.100000 | C7-C8-H8    | 119.100000 |
| C10-C9-C8   | 119.53(17) | C10-C9-H9   | 120.200000 |
| C8-C9-H9    | 120.200000 | C9-C10-C11  | 119.73(18) |
| C9-C10-H10  | 120.100000 | C11-C10-H10 | 120.100000 |
| C10-C11-C12 | 122.09(17) | C10-C11-H11 | 119.000000 |
| C12-C11-H11 | 119.000000 | C11-C12-C7  | 117.81(15) |
| C11-C12-C13 | 120.58(16) | C7-C12-C13  | 121.57(16) |
| C14-C13-C12 | 124.09(16) | C14-C13-H13 | 118.000000 |
| C12-C13-H13 | 118.000000 | C13-C14-C15 | 129.82(17) |
| C13-C14-H14 | 115.100000 | C15-C14-H14 | 115.100000 |
| C16-C15-C14 | 122.00(16) | C16-C15-C18 | 104.99(14) |

|               |            |               |            |
|---------------|------------|---------------|------------|
| C14-C15-C18   | 133.01(15) | C15-C16-O1    | 111.97(15) |
| C15-C16-C19   | 133.84(16) | O1-C16-C19    | 114.19(15) |
| O1-C17-C20    | 123.08(16) | O1-C17-C18    | 110.92(14) |
| C20-C17-C18   | 125.99(17) | C17-C18-C23   | 116.32(15) |
| C17-C18-C15   | 105.98(14) | C23-C18-C15   | 137.63(16) |
| O2-C19-C16    | 121.32(17) | O2-C19-C24    | 120.78(18) |
| C16-C19-C24   | 117.89(18) | C21-C20-C17   | 115.48(18) |
| C21-C20-H20   | 122.300000 | C17-C20-H20   | 122.300000 |
| C20-C21-C22   | 121.64(18) | C20-C21-H21   | 119.200000 |
| C22-C21-H21   | 119.200000 | C23-C22-C21   | 121.80(19) |
| C23-C22-H22   | 119.100000 | C21-C22-H22   | 119.100000 |
| O3-C23-C22    | 121.39(17) | O3-C23-C18    | 119.85(16) |
| C22-C23-C18   | 118.75(17) | C19-C24-H24A  | 109.500000 |
| C19-C24-H24B  | 109.500000 | H24A-C24-H24B | 109.500000 |
| C19-C24-H24C  | 109.500000 | H24A-C24-H24C | 109.500000 |
| H24B-C24-H24C | 109.500000 |               |            |

Table 6. Torsion angles (°) for **6f**.

|             |         |             |             |
|-------------|---------|-------------|-------------|
| C6-C1-C2-C3 | 2.0(3)  | C6-C1-C2-C7 | -171.66(18) |
| C1-C2-C3-C4 | -2.0(3) | C7-C2-C3-C4 | 171.78(16)  |
| C2-C3-C4-C5 | 0.2(3)  | C3-C4-C5-C6 | 1.6(3)      |

|                 |             |                 |             |
|-----------------|-------------|-----------------|-------------|
| C4-C5-C6-C1     | -1.6(3)     | C2-C1-C6-C5     | -0.3(3)     |
| C1-C2-C7-C8     | 124.68(19)  | C3-C2-C7-C8     | -48.8(2)    |
| C1-C2-C7-C12    | -52.2(2)    | C3-C2-C7-C12    | 134.35(18)  |
| C12-C7-C8-C9    | 0.6(3)      | C2-C7-C8-C9     | -176.40(17) |
| C7-C8-C9-C10    | 0.0(3)      | C8-C9-C10-C11   | -0.5(3)     |
| C9-C10-C11-C12  | 0.5(3)      | C10-C11-C12-C7  | 0.1(3)      |
| C10-C11-C12-C13 | -177.60(17) | C8-C7-C12-C11   | -0.6(2)     |
| C2-C7-C12-C11   | 176.13(16)  | C8-C7-C12-C13   | 177.07(16)  |
| C2-C7-C12-C13   | -6.2(3)     | C11-C12-C13-C14 | -21.8(3)    |
| C7-C12-C13-C14  | 160.60(18)  | C12-C13-C14-C15 | 179.29(17)  |
| C13-C14-C15-C16 | 177.94(19)  | C13-C14-C15-C18 | -1.0(3)     |
| C14-C15-C16-O1  | -178.45(15) | C18-C15-C16-O1  | 0.7(2)      |
| C14-C15-C16-C19 | 1.2(3)      | C18-C15-C16-C19 | -179.6(2)   |
| C17-O1-C16-C15  | -0.5(2)     | C17-O1-C16-C19  | 179.77(17)  |
| C16-O1-C17-C20  | -178.71(18) | C16-O1-C17-C18  | 0.01(19)    |
| O1-C17-C18-C23  | -177.08(16) | C20-C17-C18-C23 | 1.6(3)      |
| O1-C17-C18-C15  | 0.4(2)      | C20-C17-C18-C15 | 179.09(19)  |
| C16-C15-C18-C17 | -0.7(2)     | C14-C15-C18-C17 | 178.36(19)  |
| C16-C15-C18-C23 | 176.0(2)    | C14-C15-C18-C23 | -5.0(4)     |
| C15-C16-C19-O2  | 2.9(4)      | O1-C16-C19-O2   | -177.41(19) |

|                 |            |                 |           |
|-----------------|------------|-----------------|-----------|
| C15-C16-C19-C24 | -177.1(2)  | O1-C16-C19-C24  | 2.6(3)    |
| O1-C17-C20-C21  | 177.93(19) | C18-C17-C20-C21 | -0.6(3)   |
| C17-C20-C21-C22 | -0.4(3)    | C20-C21-C22-C23 | 0.4(4)    |
| C21-C22-C23-O3  | -178.7(2)  | C21-C22-C23-C18 | 0.7(3)    |
| C17-C18-C23-O3  | 177.83(17) | C15-C18-C23-O3  | 1.4(4)    |
| C17-C18-C23-C22 | -1.6(3)    | C15-C18-C23-C22 | -178.0(2) |

Table 7. Anisotropic atomic displacement parameters ( $\text{\AA}^2$ ) for compound **6f**.

The anisotropic atomic displacement factor exponent takes the form:  $-2\pi^2 [h^2 a^{*2} U_{11} + \dots + 2 h k a^* b^* U_{12}]$

|     | $U_{11}$   | $U_{22}$   | $U_{33}$   | $U_{23}$    | $U_{13}$   | $U_{12}$    |
|-----|------------|------------|------------|-------------|------------|-------------|
| O1  | 0.0466(7)  | 0.0458(7)  | 0.0533(7)  | -0.0015(6)  | 0.0013(6)  | 0.0019(5)   |
| O2  | 0.0915(11) | 0.0421(8)  | 0.0748(10) | -0.0075(7)  | 0.0005(8)  | 0.0088(7)   |
| O3  | 0.0885(11) | 0.0381(7)  | 0.0690(9)  | -0.0006(6)  | -0.0087(8) | 0.0066(7)   |
| C1  | 0.0712(13) | 0.0503(11) | 0.0526(11) | 0.0077(9)   | 0.0208(10) | 0.0037(10)  |
| C2  | 0.0425(9)  | 0.0439(10) | 0.0444(9)  | 0.0031(7)   | 0.0065(7)  | -0.0030(7)  |
| C3  | 0.0559(11) | 0.0513(11) | 0.0478(10) | 0.0068(8)   | 0.0102(9)  | -0.0008(9)  |
| C4  | 0.0566(12) | 0.0435(10) | 0.0637(12) | 0.0053(9)   | 0.0062(10) | 0.0026(9)   |
| C5  | 0.0595(12) | 0.0511(12) | 0.0773(14) | -0.0054(10) | 0.0209(11) | 0.0028(9)   |
| C6  | 0.0860(15) | 0.0614(14) | 0.0658(13) | -0.0018(11) | 0.0349(12) | 0.0003(12)  |
| C7  | 0.0506(10) | 0.0413(9)  | 0.0399(9)  | 0.0049(7)   | 0.0108(8)  | -0.0041(8)  |
| C8  | 0.0585(11) | 0.0563(12) | 0.0408(9)  | 0.0047(8)   | 0.0063(9)  | -0.0014(9)  |
| C9  | 0.0717(13) | 0.0589(12) | 0.0385(9)  | -0.0023(9)  | 0.0127(9)  | -0.0116(10) |
| C10 | 0.0692(13) | 0.0461(10) | 0.0510(10) | -0.0052(8)  | 0.0241(10) | -0.0095(9)  |



|     | <b>U<sub>11</sub></b> | <b>U<sub>22</sub></b> | <b>U<sub>33</sub></b> | <b>U<sub>23</sub></b> | <b>U<sub>13</sub></b> | <b>U<sub>12</sub></b> |
|-----|-----------------------|-----------------------|-----------------------|-----------------------|-----------------------|-----------------------|
| C11 | 0.0553(11)            | 0.0450(10)            | 0.0507(10)            | 0.0009(8)             | 0.0143(9)             | -0.0010(8)            |
| C12 | 0.0480(10)            | 0.0391(9)             | 0.0416(9)             | 0.0028(7)             | 0.0118(8)             | -0.0031(7)            |
| C13 | 0.0481(10)            | 0.0392(9)             | 0.0480(10)            | -0.0024(7)            | 0.0094(8)             | -0.0013(8)            |
| C14 | 0.0550(11)            | 0.0369(9)             | 0.0484(10)            | -0.0014(7)            | 0.0086(8)             | -0.0004(8)            |
| C15 | 0.0438(9)             | 0.0384(9)             | 0.0461(9)             | 0.0016(7)             | 0.0092(8)             | -0.0016(7)            |
| C16 | 0.0463(10)            | 0.0432(10)            | 0.0479(10)            | -0.0018(8)            | 0.0060(8)             | 0.0001(8)             |
| C17 | 0.0431(9)             | 0.0427(10)            | 0.0539(10)            | -0.0020(8)            | 0.0101(8)             | -0.0017(8)            |
| C18 | 0.0423(9)             | 0.0378(9)             | 0.0475(9)             | -0.0012(7)            | 0.0093(7)             | -0.0028(7)            |
| C19 | 0.0540(11)            | 0.0441(11)            | 0.0690(13)            | 0.0007(10)            | 0.0067(10)            | 0.0046(9)             |
| C20 | 0.0563(12)            | 0.0558(12)            | 0.0584(12)            | -0.0093(9)            | 0.0015(9)             | -0.0063(9)            |
| C21 | 0.0741(14)            | 0.0540(13)            | 0.0709(14)            | -0.0202(11)           | 0.0017(11)            | -0.0075(11)           |
| C22 | 0.0730(14)            | 0.0411(11)            | 0.0780(14)            | -0.0121(10)           | 0.0072(11)            | -0.0004(10)           |
| C23 | 0.0556(11)            | 0.0408(10)            | 0.0574(11)            | -0.0005(8)            | 0.0057(9)             | -0.0006(8)            |
| C24 | 0.0742(15)            | 0.0621(14)            | 0.0963(17)            | 0.0039(12)            | -0.0066(13)           | 0.0251(12)            |

Table 8. Hydrogen atomic coordinates and isotropic atomic displacement parameters ( $\text{\AA}^2$ ) for compound **6f**.

|     | <b>x/a</b> | <b>y/b</b> | <b>z/c</b> | <b>U(eq)</b> |
|-----|------------|------------|------------|--------------|
| H1B | 0.410(3)   | 0.7229(18) | 0.730(3)   | 0.116000     |
| H1  | 0.1178     | 0.5453     | 0.5941     | 0.071000     |
| H3  | 0.0587     | 0.6580     | 0.2301     | 0.066000     |
| H4  | -0.0464    | 0.7547     | 0.2957     | 0.072000     |
| H5  | -0.0742    | 0.7460     | 0.5071     | 0.077000     |
| H6  | 0.0123     | 0.6425     | 0.6577     | 0.083000     |
| H8  | -0.0020    | 0.5180     | 0.1614     | 0.067000     |
| H9  | 0.0588     | 0.4105     | 0.0692     | 0.071000     |

|      | <b>x/a</b> | <b>y/b</b> | <b>z/c</b> | <b>U(eq)</b> |
|------|------------|------------|------------|--------------|
| H10  | 0.2480     | 0.3481     | 0.2014     | 0.066000     |
| H11  | 0.3758     | 0.3947     | 0.4225     | 0.063000     |
| H13  | 0.3419     | 0.5671     | 0.5912     | 0.058000     |
| H14  | 0.4475     | 0.4223     | 0.6411     | 0.060000     |
| H20  | 0.7771     | 0.5918     | 1.2113     | 0.076000     |
| H21  | 0.6995     | 0.7177     | 1.1680     | 0.089000     |
| H22  | 0.5405     | 0.7511     | 0.9541     | 0.085000     |
| H24A | 0.7256     | 0.3324     | 1.0927     | 0.135000     |
| H24B | 0.8268     | 0.3448     | 1.0256     | 0.135000     |
| H24C | 0.7447     | 0.2685     | 0.9929     | 0.135000     |

Table 9. Hydrogen bond distances (Å) and angles (°) for compound **6f**.

|                | <b>Donor-H</b> | <b>Acceptor-H</b> | <b>Donor-Acceptor</b> | <b>Angle</b> |
|----------------|----------------|-------------------|-----------------------|--------------|
| O3-H1B... O2#1 | 0.98(3)        | 1.76(3)           | 2.7331(19)            | 172.(2)      |
| C22-H22...O2#1 | 0.930000       | 2.560000          | 3.247(3)              | 131.500000   |

Symmetry transformations used to generate equivalent atoms:

#1         $-x+1, y+1/2, -z+3/2$

Crystal Structure Report for compound **7d**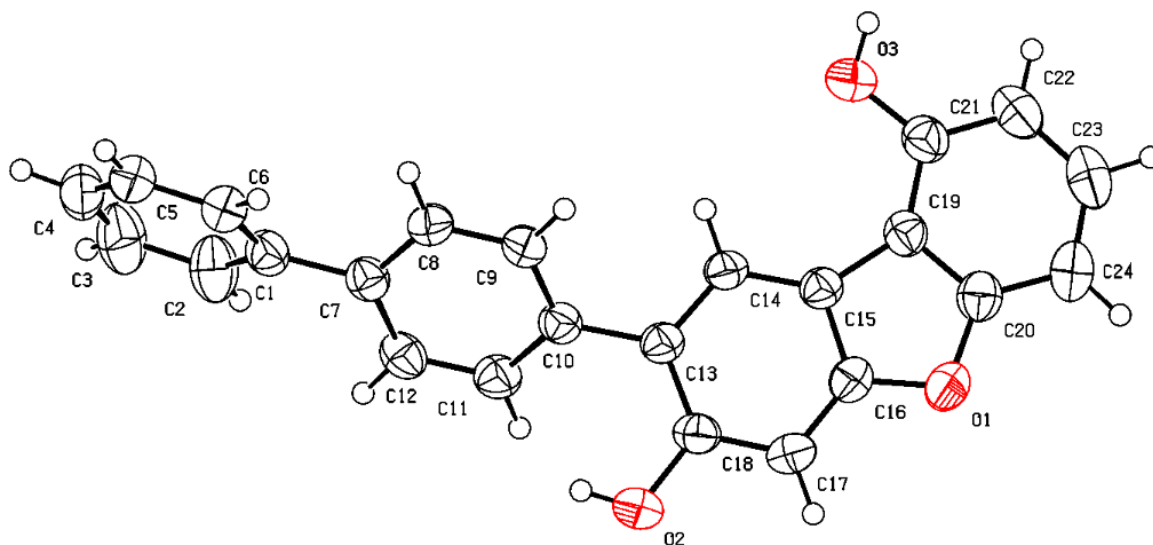

**CCDC NUMBER: 2181857**

A specimen of  $C_{24}H_{16}O_3$  was used for the X-ray crystallographic analysis. The X-ray intensity data were measured ( $\lambda = 0.71073 \text{ \AA}$ ).

The integration of the data using a **triclinic** unit cell yielded a total of **38013** reflections to a maximum  $\theta$  angle of **28.29°** (**0.75 Å** resolution), of which **4227** were independent (average redundancy **8.993**, completeness = **99.2%**,  $R_{\text{int}} = \mathbf{3.90\%}$ ,  $R_{\text{sig}} = \mathbf{2.55\%}$ ) and **3088** (**73.05%**) were greater than  $2\sigma(F^2)$ . The final cell constants of  $\underline{a} = \mathbf{9.1787(5) \text{ \AA}}$ ,  $\underline{b} = \mathbf{9.1920(5) \text{ \AA}}$ ,  $\underline{c} = \mathbf{11.2622(6) \text{ \AA}}$ ,  $\alpha = \mathbf{105.164(2)^\circ}$ ,  $\beta = \mathbf{92.910(2)^\circ}$ ,  $\gamma = \mathbf{109.138(2)^\circ}$ , volume =  $\mathbf{856.66(8) \text{ \AA}^3}$ , are based upon the refinement of the XYZ-centroids of reflections above 20  $\sigma(I)$ .

The structure was solved and refined using the Bruker SHELXTL Software Package, using the space group **P -1**, with  $Z = \mathbf{2}$  for the formula unit,  $C_{24}H_{16}O_3$ . The final anisotropic full-matrix least-squares refinement on  $F^2$  with **250** variables converged at  $R1 = \mathbf{4.65\%}$ , for the observed data and  $wR2 = \mathbf{13.66\%}$  for all data. The goodness-of-fit was **0.954**. The largest peak in the final difference electron density synthesis was  $\mathbf{0.200 \text{ e}^-/\text{\AA}^3}$  and the largest hole was  $\mathbf{-0.164 \text{ e}^-/\text{\AA}^3}$  with an RMS deviation of  $\mathbf{0.032 \text{ e}^-/\text{\AA}^3}$ . On the basis of the final model, the calculated density was  $\mathbf{1.366 \text{ g/cm}^3}$  and  $F(000)$ , **368 e<sup>-</sup>**.

Table 1. Sample and crystal data for compound **7d**.

|                               |                                                |                             |
|-------------------------------|------------------------------------------------|-----------------------------|
| <b>Identification code</b>    | work_3                                         |                             |
| <b>Chemical formula</b>       | C <sub>24</sub> H <sub>16</sub> O <sub>3</sub> |                             |
| <b>Formula weight</b>         | 352.37 g/mol                                   |                             |
| <b>Temperature</b>            | 302(2) K                                       |                             |
| <b>Wavelength</b>             | 0.71073 Å                                      |                             |
| <b>Crystal system</b>         | triclinic                                      |                             |
| <b>Space group</b>            | P -1                                           |                             |
| <b>Unit cell dimensions</b>   | a = 9.1787(5) Å                                | $\alpha = 105.164(2)^\circ$ |
|                               | b = 9.1920(5) Å                                | $\beta = 92.910(2)^\circ$   |
|                               | c = 11.2622(6) Å                               | $\gamma = 109.138(2)^\circ$ |
| <b>Volume</b>                 | 856.66(8) Å <sup>3</sup>                       |                             |
| <b>Z</b>                      | 2                                              |                             |
| <b>Density (calculated)</b>   | 1.366 g/cm <sup>3</sup>                        |                             |
| <b>Absorption coefficient</b> | 0.090 mm <sup>-1</sup>                         |                             |
| <b>F (000)</b>                | 368                                            |                             |

Table 2. Data collection and structure refinement for compound **7d**.

|                                        |                                          |
|----------------------------------------|------------------------------------------|
| <b>Theta range for data collection</b> | 2.38 to 28.29°                           |
| <b>Index ranges</b>                    | -12 ≤ h ≤ 12, -12 ≤ k ≤ 12, -15 ≤ l ≤ 14 |
| <b>Reflections collected</b>           | 38013                                    |
| <b>Independent reflections</b>         | 4227 [R(int) = 0.0390]                   |
| <b>Structure solution technique</b>    | direct methods                           |
| <b>Structure solution program</b>      | SHELXT 2018/2 (Sheldrick, 2018)          |

|                                            |                                                                                         |                           |
|--------------------------------------------|-----------------------------------------------------------------------------------------|---------------------------|
| <b>Refinement method</b>                   | Full-matrix least-squares on $F^2$                                                      |                           |
| <b>Refinement program</b>                  | SHELXL-2018/3 (Sheldrick, 2018)                                                         |                           |
| <b>Function minimized</b>                  | $\Sigma w (F_o^2 - F_c^2)^2$                                                            |                           |
| <b>Data / restraints / parameters</b>      | 4227 / 0 / 250                                                                          |                           |
| <b>Goodness-of-fit on <math>F^2</math></b> | 0.954                                                                                   |                           |
| <b>Final R indices</b>                     | 3088 data; $I > 2\sigma(I)$                                                             | R1 = 0.0465, wR2 = 0.1138 |
|                                            | all data                                                                                | R1 = 0.0713, wR2 = 0.1366 |
| <b>Weighting scheme</b>                    | $w = 1 / [\sigma^2(F_o^2) + (0.0605P)^2 + 0.3197P]$<br>where $P = (F_o^2 + 2F_c^2) / 3$ |                           |
| <b>Largest diff. peak and hole</b>         | 0.200 and -0.164 $e\text{\AA}^{-3}$                                                     |                           |
| <b>R.M.S. deviation from mean</b>          | 0.032 $e\text{\AA}^{-3}$                                                                |                           |

Table 3. Atomic coordinates and equivalent isotropic atomic displacement parameters ( $\text{\AA}^2$ ) for compound **7d**.

$U(\text{eq})$  is defined as one third of the trace of the orthogonalized  $U_{ij}$  tensor.

|    | <b>x/a</b>  | <b>y/b</b>  | <b>z/c</b>  | <b>U(eq)</b> |
|----|-------------|-------------|-------------|--------------|
| O1 | 0.93069(13) | 0.31243(14) | 0.27708(10) | 0.0515(3)    |
| O2 | 0.81086(16) | 0.01954(14) | 0.57457(12) | 0.0588(3)    |
| O3 | 0.69277(17) | 0.67468(16) | 0.45184(12) | 0.0645(4)    |
| C1 | 0.40847(18) | 0.18307(19) | 0.01344(14) | 0.0443(3)    |
| C2 | 0.2608(2)   | 0.0697(3)   | 0.00242(18) | 0.0657(5)    |
| C3 | 0.1830(2)   | 0.0688(3)   | 0.1055(2)   | 0.0767(6)    |
| C4 | 0.2509(2)   | 0.1792(3)   | 0.21932(19) | 0.0648(5)    |
| C5 | 0.3987(2)   | 0.2875(2)   | 0.23254(17) | 0.0576(4)    |

|     | <b>x/a</b>  | <b>y/b</b>  | <b>z/c</b>  | <b>U(eq)</b> |
|-----|-------------|-------------|-------------|--------------|
| C6  | 0.4764(2)   | 0.2898(2)   | 0.13057(15) | 0.0491(4)    |
| C7  | 0.48993(17) | 0.19430(18) | 0.90376(13) | 0.0410(3)    |
| C8  | 0.58789(18) | 0.34361(18) | 0.89676(14) | 0.0441(3)    |
| C9  | 0.66221(18) | 0.35717(17) | 0.79465(14) | 0.0430(3)    |
| C10 | 0.64191(17) | 0.22282(17) | 0.69378(13) | 0.0401(3)    |
| C11 | 0.54265(18) | 0.07392(18) | 0.70035(14) | 0.0458(4)    |
| C12 | 0.46949(18) | 0.06017(18) | 0.80347(15) | 0.0460(4)    |
| C13 | 0.72158(17) | 0.24327(17) | 0.58436(13) | 0.0398(3)    |
| C14 | 0.72101(17) | 0.36770(17) | 0.53553(13) | 0.0406(3)    |
| C15 | 0.79482(17) | 0.38730(17) | 0.43332(13) | 0.0396(3)    |
| C16 | 0.86867(17) | 0.28085(18) | 0.38110(13) | 0.0428(3)    |
| C17 | 0.87666(18) | 0.15912(18) | 0.42745(14) | 0.0466(4)    |
| C18 | 0.80221(18) | 0.14243(17) | 0.52934(14) | 0.0434(3)    |
| C19 | 0.81457(17) | 0.49504(17) | 0.35706(13) | 0.0422(3)    |
| C20 | 0.89531(18) | 0.4431(2)   | 0.26337(15) | 0.0475(4)    |
| C21 | 0.7716(2)   | 0.62749(19) | 0.35875(15) | 0.0488(4)    |
| C22 | 0.8079(2)   | 0.6996(2)   | 0.26531(17) | 0.0583(4)    |
| C23 | 0.8869(2)   | 0.6428(2)   | 0.17307(17) | 0.0639(5)    |
| C24 | 0.9327(2)   | 0.5129(2)   | 0.16951(16) | 0.0599(5)    |

Table 4. Bond lengths (Å) for compound **7d**.

|        |            |        |          |
|--------|------------|--------|----------|
| O1-C16 | 1.3850(18) | O1-C20 | 1.386(2) |
| O2-C18 | 1.3775(18) | O3-C21 | 1.363(2) |
| C1-C2  | 1.389(2)   | C1-C6  | 1.389(2) |
| C1-C7  | 1.485(2)   | C2-C3  | 1.394(3) |
| C3-C4  | 1.373(3)   | C4-C5  | 1.367(3) |

|         |          |         |          |
|---------|----------|---------|----------|
| C5-C6   | 1.384(2) | C7-C12  | 1.389(2) |
| C7-C8   | 1.397(2) | C8-C9   | 1.379(2) |
| C9-C10  | 1.394(2) | C10-C11 | 1.397(2) |
| C10-C13 | 1.487(2) | C11-C12 | 1.384(2) |
| C13-C14 | 1.394(2) | C13-C18 | 1.409(2) |
| C14-C15 | 1.387(2) | C15-C16 | 1.392(2) |
| C15-C19 | 1.447(2) | C16-C17 | 1.373(2) |
| C17-C18 | 1.382(2) | C19-C20 | 1.392(2) |
| C19-C21 | 1.393(2) | C20-C24 | 1.376(2) |
| C21-C22 | 1.383(2) | C22-C23 | 1.385(3) |
| C23-C24 | 1.383(3) |         |          |

Table 5. Bond angles (°) for compound **7d**.

|             |            |             |            |
|-------------|------------|-------------|------------|
| C16-O1-C20  | 105.61(11) | C2-C1-C6    | 117.69(15) |
| C2-C1-C7    | 121.59(15) | C6-C1-C7    | 120.69(14) |
| C1-C2-C3    | 120.29(19) | C4-C3-C2    | 120.75(18) |
| C5-C4-C3    | 119.54(17) | C4-C5-C6    | 120.05(18) |
| C5-C6-C1    | 121.60(16) | C12-C7-C8   | 117.39(14) |
| C12-C7-C1   | 122.21(14) | C8-C7-C1    | 120.38(13) |
| C9-C8-C7    | 121.33(14) | C8-C9-C10   | 121.44(14) |
| C9-C10-C11  | 117.15(13) | C9-C10-C13  | 119.70(13) |
| C11-C10-C13 | 123.12(13) | C12-C11-C10 | 121.36(14) |
| C11-C12-C7  | 121.32(14) | C14-C13-C18 | 118.24(13) |
| C14-C13-C10 | 119.82(13) | C18-C13-C10 | 121.92(13) |
| C15-C14-C13 | 120.13(13) | C14-C15-C16 | 118.80(13) |

|             |            |             |            |
|-------------|------------|-------------|------------|
| C14-C15-C19 | 135.75(14) | C16-C15-C19 | 105.42(13) |
| C17-C16-O1  | 124.82(13) | C17-C16-C15 | 123.53(14) |
| O1-C16-C15  | 111.65(13) | C16-C17-C18 | 116.41(13) |
| O2-C18-C17  | 115.75(13) | O2-C18-C13  | 121.42(14) |
| C17-C18-C13 | 122.84(14) | C20-C19-C21 | 118.78(14) |
| C20-C19-C15 | 106.26(13) | C21-C19-C15 | 134.96(14) |
| C24-C20-O1  | 125.16(16) | C24-C20-C19 | 123.79(17) |
| O1-C20-C19  | 111.05(13) | O3-C21-C22  | 124.41(16) |
| O3-C21-C19  | 117.08(14) | C22-C21-C19 | 118.49(16) |
| C21-C22-C23 | 120.78(17) | C24-C23-C22 | 122.18(17) |
| C20-C24-C23 | 115.96(17) |             |            |

Table 6. Anisotropic atomic displacement parameters ( $\text{\AA}^2$ ) for compound **7d**.

The anisotropic atomic displacement factor exponent takes the form:  $-2\pi^2 [h^2 a^{*2} U_{11} + \dots + 2 h k a^* b^* U_{12}]$

|    | $U_{11}$   | $U_{22}$   | $U_{33}$   | $U_{23}$   | $U_{13}$   | $U_{12}$   |
|----|------------|------------|------------|------------|------------|------------|
| O1 | 0.0554(7)  | 0.0589(7)  | 0.0463(6)  | 0.0158(5)  | 0.0179(5)  | 0.0262(5)  |
| O2 | 0.0807(9)  | 0.0507(7)  | 0.0633(8)  | 0.0250(6)  | 0.0223(7)  | 0.0387(6)  |
| O3 | 0.0964(10) | 0.0494(7)  | 0.0627(8)  | 0.0213(6)  | 0.0263(7)  | 0.0392(7)  |
| C1 | 0.0435(8)  | 0.0481(8)  | 0.0479(8)  | 0.0214(7)  | 0.0088(6)  | 0.0188(7)  |
| C2 | 0.0505(10) | 0.0807(13) | 0.0583(11) | 0.0283(10) | 0.0064(8)  | 0.0076(9)  |
| C3 | 0.0501(10) | 0.1005(17) | 0.0845(15) | 0.0502(13) | 0.0193(10) | 0.0140(11) |
| C4 | 0.0701(12) | 0.0864(14) | 0.0662(12) | 0.0451(11) | 0.0313(10) | 0.0433(11) |
| C5 | 0.0736(12) | 0.0605(10) | 0.0529(10) | 0.0235(8)  | 0.0222(9)  | 0.0349(9)  |
| C6 | 0.0539(9)  | 0.0483(9)  | 0.0487(9)  | 0.0162(7)  | 0.0134(7)  | 0.0203(7)  |
| C7 | 0.0402(7)  | 0.0433(8)  | 0.0414(8)  | 0.0150(6)  | 0.0041(6)  | 0.0158(6)  |



|     | <b>U<sub>11</sub></b> | <b>U<sub>22</sub></b> | <b>U<sub>33</sub></b> | <b>U<sub>23</sub></b> | <b>U<sub>13</sub></b> | <b>U<sub>12</sub></b> |
|-----|-----------------------|-----------------------|-----------------------|-----------------------|-----------------------|-----------------------|
| C8  | 0.0501(8)             | 0.0374(7)             | 0.0434(8)             | 0.0083(6)             | 0.0095(6)             | 0.0161(6)             |
| C9  | 0.0488(8)             | 0.0343(7)             | 0.0454(8)             | 0.0121(6)             | 0.0098(6)             | 0.0133(6)             |
| C10 | 0.0442(8)             | 0.0394(7)             | 0.0389(7)             | 0.0121(6)             | 0.0048(6)             | 0.0174(6)             |
| C11 | 0.0545(9)             | 0.0361(7)             | 0.0413(8)             | 0.0060(6)             | 0.0032(7)             | 0.0137(6)             |
| C12 | 0.0474(8)             | 0.0369(7)             | 0.0492(9)             | 0.0144(6)             | 0.0029(7)             | 0.0082(6)             |
| C13 | 0.0458(8)             | 0.0355(7)             | 0.0366(7)             | 0.0071(6)             | 0.0054(6)             | 0.0152(6)             |
| C14 | 0.0488(8)             | 0.0374(7)             | 0.0380(7)             | 0.0084(6)             | 0.0080(6)             | 0.0203(6)             |
| C15 | 0.0434(8)             | 0.0368(7)             | 0.0371(7)             | 0.0082(6)             | 0.0051(6)             | 0.0146(6)             |
| C16 | 0.0427(8)             | 0.0448(8)             | 0.0383(7)             | 0.0084(6)             | 0.0072(6)             | 0.0150(6)             |
| C17 | 0.0506(9)             | 0.0434(8)             | 0.0485(9)             | 0.0079(7)             | 0.0098(7)             | 0.0241(7)             |
| C18 | 0.0500(8)             | 0.0365(7)             | 0.0450(8)             | 0.0100(6)             | 0.0049(6)             | 0.0188(6)             |
| C19 | 0.0455(8)             | 0.0404(7)             | 0.0372(7)             | 0.0107(6)             | 0.0037(6)             | 0.0117(6)             |
| C20 | 0.0461(8)             | 0.0507(9)             | 0.0426(8)             | 0.0133(7)             | 0.0057(6)             | 0.0138(7)             |
| C21 | 0.0566(9)             | 0.0415(8)             | 0.0452(8)             | 0.0127(6)             | 0.0052(7)             | 0.0141(7)             |
| C22 | 0.0696(11)            | 0.0483(9)             | 0.0551(10)            | 0.0225(8)             | 0.0016(9)             | 0.0141(8)             |
| C23 | 0.0692(12)            | 0.0662(12)            | 0.0536(10)            | 0.0311(9)             | 0.0083(9)             | 0.0101(9)             |
| C24 | 0.0586(10)            | 0.0743(12)            | 0.0476(9)             | 0.0241(9)             | 0.0159(8)             | 0.0185(9)             |

Table 7. Hydrogen atomic coordinates and isotropic atomic displacement parameters ( $\text{\AA}^2$ ) for compound **7d**.

|     | <b>x/a</b> | <b>y/b</b> | <b>z/c</b> | <b>U(eq)</b> |
|-----|------------|------------|------------|--------------|
| H1  | 0.775(3)   | 0.024(3)   | 0.644(2)   | 0.088000     |
| H1B | 0.704(3)   | 0.776(3)   | 0.465(2)   | 0.097000     |
| H2  | 0.2135     | -0.0060    | 0.9259     | 0.079000     |
| H3  | 0.0840     | -0.0075    | 1.0971     | 0.092000     |
| H4  | 0.1968     | 0.1803     | 1.2869     | 0.078000     |
| H5  | 0.4470     | 0.3596     | 1.3101     | 0.069000     |

|     | <b>x/a</b> | <b>y/b</b> | <b>z/c</b> | <b>U(eq)</b> |
|-----|------------|------------|------------|--------------|
| H6  | 0.5766     | 0.3645     | 1.1407     | 0.059000     |
| H8  | 0.6033     | 0.4357     | 0.9623     | 0.053000     |
| H9  | 0.7273     | 0.4581     | 0.7930     | 0.052000     |
| H11 | 0.5254     | -0.0179    | 0.6341     | 0.055000     |
| H12 | 0.4054     | -0.0409    | 0.8056     | 0.055000     |
| H14 | 0.6710     | 0.4377     | 0.5716     | 0.049000     |
| H17 | 0.9293     | 0.0915     | 0.3922     | 0.056000     |
| H22 | 0.7789     | 0.7873     | 0.2644     | 0.070000     |
| H23 | 0.9098     | 0.6938     | 0.1115     | 0.077000     |
| H24 | 0.9857     | 0.4749     | 0.1074     | 0.072000     |

Crystal Structure Report for compound **23**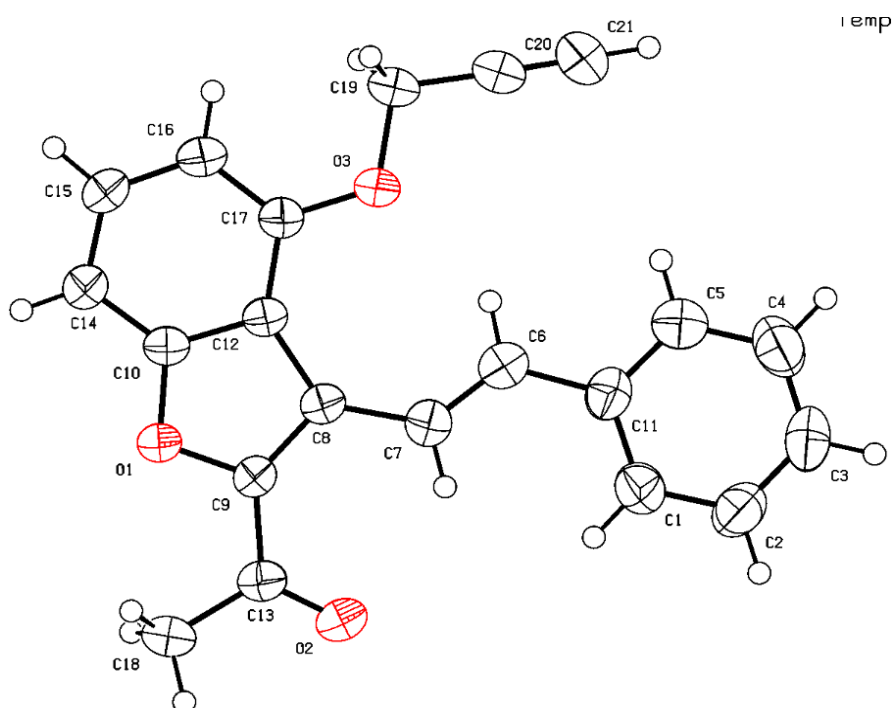

**CCDC NUMBER: 2247453**

A specimen of  $C_{21}H_{16}O_3$  was used for the X-ray crystallographic analysis. The X-ray intensity data were measured ( $\lambda = 0.71073 \text{ \AA}$ ).

The integration of the data using a **monoclinic** unit cell yielded a total of **28657** reflections to a maximum  $\theta$  angle of **28.34°** (**0.75 Å** resolution), of which **3966** were independent (average redundancy **7.226**, completeness = **99.2%**,  $R_{\text{int}} = 4.84\%$ ,  $R_{\text{sig}} = 3.81\%$ ) and **2476** (**62.43%**) were greater than  $2\sigma(F^2)$ . The final cell constants of  $a = 10.4864(11) \text{ \AA}$ ,  $b = 10.0490(9) \text{ \AA}$ ,  $c = 15.2051(13) \text{ \AA}$ ,  $\beta = 89.824(3)^\circ$ , volume =  $1602.3(3) \text{ \AA}^3$ , are based upon the refinement of the XYZ-centroids of reflections above  $20 \sigma(I)$ . The calculated minimum and maximum transmission coefficients (based on crystal size) are **0.6532** and **0.7457**.

The structure was solved and refined using the Bruker SHELXTL Software Package, using the space group **P 1 21/n 1**, with  $Z = 4$  for the formula unit,  $C_{21}H_{16}O_3$ . The final anisotropic full-matrix least-squares refinement on  $F^2$  with **218** variables converged at  $R1 = 5.51\%$ , for the observed data and  $wR2 = 15.20\%$  for all data. The goodness-of-fit was **1.026**. The largest peak in the final difference electron density synthesis was  $0.352 \text{ e}^-/\text{\AA}^3$  and the largest hole was  $-0.245 \text{ e}^-/\text{\AA}^3$  with an RMS deviation of  $0.037 \text{ e}^-/\text{\AA}^3$ . On the basis of the final model, the calculated density was  $1.311 \text{ g/cm}^3$  and  $F(000)$ , **664 e<sup>-</sup>**.

Table 1. Sample and crystal data for compound **23**.

|                            |                   |
|----------------------------|-------------------|
| <b>Identification code</b> | workSA_167        |
| <b>Chemical formula</b>    | $C_{21}H_{16}O_3$ |
| <b>Formula weight</b>      | 316.34 g/mol      |
| <b>Temperature</b>         | 300(2) K          |
| <b>Wavelength</b>          | 0.71073 Å         |
| <b>Crystal system</b>      | monoclinic        |

|                               |                          |                           |
|-------------------------------|--------------------------|---------------------------|
| <b>Space group</b>            | P 1 21/n 1               |                           |
| <b>Unit cell dimensions</b>   | a = 10.4864(11) Å        | $\alpha = 90^\circ$       |
|                               | b = 10.0490(9) Å         | $\beta = 89.824(3)^\circ$ |
|                               | c = 15.2051(13) Å        | $\gamma = 90^\circ$       |
| <b>Volume</b>                 | 1602.3(3) Å <sup>3</sup> |                           |
| <b>Z</b>                      | 4                        |                           |
| <b>Density (calculated)</b>   | 1.311 g/cm <sup>3</sup>  |                           |
| <b>Absorption coefficient</b> | 0.087 mm <sup>-1</sup>   |                           |
| <b>F (000)</b>                | 664                      |                           |

Table 2. Data collection and structure refinement for compound **23**.

|                                         |                                             |                           |
|-----------------------------------------|---------------------------------------------|---------------------------|
| <b>Theta range for data collection</b>  | 2.43 to 28.34°                              |                           |
| <b>Index ranges</b>                     | -13 ≤ h ≤ 13, -13 ≤ k ≤ 11, -20 ≤ l ≤ 20    |                           |
| <b>Reflections collected</b>            | 28657                                       |                           |
| <b>Independent reflections</b>          | 3966 [R(int) = 0.0484]                      |                           |
| <b>Max. and min. transmission</b>       | 0.7457 and 0.6532                           |                           |
| <b>Structure solution technique</b>     | direct methods                              |                           |
| <b>Structure solution program</b>       | SHELXT 2018/2 (Sheldrick, 2018)             |                           |
| <b>Refinement method</b>                | Full-matrix least-squares on F <sup>2</sup> |                           |
| <b>Refinement program</b>               | SHELXL-2018/3 (Sheldrick, 2018)             |                           |
| <b>Function minimized</b>               | $\Sigma w (F_o^2 - F_c^2)^2$                |                           |
| <b>Data / restraints / parameters</b>   | 3966 / 0 / 218                              |                           |
| <b>Goodness-of-fit on F<sup>2</sup></b> | 1.026                                       |                           |
| <b>Final R indices</b>                  | 2476 data; I > 2σ(I)                        | R1 = 0.0551, wR2 = 0.1238 |

|                                    |                                                                            |                           |
|------------------------------------|----------------------------------------------------------------------------|---------------------------|
|                                    | all data                                                                   | R1 = 0.1002, wR2 = 0.1520 |
| <b>Weighting scheme</b>            | $w=1/[\sigma^2(F_o^2) +(0.0557P)^2+0.6585P]$<br>where $P=(F_o^2+2F_c^2)/3$ |                           |
| <b>Largest diff. peak and hole</b> | 0.352 and -0.245 eÅ <sup>-3</sup>                                          |                           |
| <b>R.M.S. deviation from mean</b>  | 0.037 eÅ <sup>-3</sup>                                                     |                           |

Table 3. Atomic coordinates and equivalent isotropic atomic displacement parameters (Å<sup>2</sup>) for compound **23**.

U(eq) is defined as one third of the trace of the orthogonalized U<sub>ij</sub> tensor.

|     | <b>x/a</b>  | <b>y/b</b>  | <b>z/c</b>  | <b>U(eq)</b> |
|-----|-------------|-------------|-------------|--------------|
| O1  | 0.54921(13) | 0.41774(12) | 0.86596(8)  | 0.0483(4)    |
| O2  | 0.59766(17) | 0.13335(13) | 0.73541(10) | 0.0667(5)    |
| O3  | 0.61266(14) | 0.72382(12) | 0.64072(8)  | 0.0511(4)    |
| C1  | 0.7087(2)   | 0.2540(2)   | 0.46295(14) | 0.0576(5)    |
| C2  | 0.7445(2)   | 0.2038(2)   | 0.38214(15) | 0.0642(6)    |
| C3  | 0.7585(2)   | 0.2863(3)   | 0.31159(14) | 0.0668(6)    |
| C4  | 0.7379(2)   | 0.4188(3)   | 0.32103(15) | 0.0729(7)    |
| C5  | 0.7015(2)   | 0.4705(2)   | 0.40126(15) | 0.0632(6)    |
| C6  | 0.64507(19) | 0.4501(2)   | 0.55805(13) | 0.0517(5)    |
| C7  | 0.63714(19) | 0.3884(2)   | 0.63337(12) | 0.0489(5)    |
| C8  | 0.59973(17) | 0.43682(17) | 0.72008(11) | 0.0398(4)    |
| C9  | 0.58096(18) | 0.35099(17) | 0.78961(11) | 0.0428(4)    |
| C10 | 0.54565(19) | 0.54943(17) | 0.84438(12) | 0.0451(4)    |
| C11 | 0.68609(18) | 0.3899(2)   | 0.47381(12) | 0.0490(5)    |
| C12 | 0.57737(17) | 0.56882(16) | 0.75594(11) | 0.0390(4)    |
| C13 | 0.58656(19) | 0.20557(18) | 0.79945(12) | 0.0467(5)    |

|     | <b>x/a</b>  | <b>y/b</b>  | <b>z/c</b>  | <b>U(eq)</b> |
|-----|-------------|-------------|-------------|--------------|
| C14 | 0.5130(2)   | 0.6475(2)   | 0.90390(14) | 0.0620(6)    |
| C15 | 0.5152(2)   | 0.7752(2)   | 0.87138(14) | 0.0640(6)    |
| C16 | 0.5489(2)   | 0.80259(19) | 0.78472(13) | 0.0539(5)    |
| C17 | 0.57943(18) | 0.70199(17) | 0.72679(11) | 0.0420(4)    |
| C18 | 0.5771(2)   | 0.15078(19) | 0.89081(13) | 0.0552(5)    |
| C19 | 0.6030(2)   | 0.85757(18) | 0.60893(13) | 0.0512(5)    |
| C20 | 0.6204(3)   | 0.8541(2)   | 0.51437(15) | 0.0655(6)    |
| C21 | 0.6270(4)   | 0.8533(3)   | 0.43821(18) | 0.1097(12)   |

Table 4. Bond lengths (Å) for compound **23**.

|         |          |         |          |
|---------|----------|---------|----------|
| O1-C10  | 1.364(2) | O1-C9   | 1.381(2) |
| O2-C13  | 1.220(2) | O3-C17  | 1.371(2) |
| O3-C19  | 1.432(2) | C1-C2   | 1.379(3) |
| C1-C11  | 1.396(3) | C2-C3   | 1.363(3) |
| C3-C4   | 1.357(4) | C4-C5   | 1.378(3) |
| C5-C11  | 1.378(3) | C6-C7   | 1.305(3) |
| C6-C11  | 1.479(3) | C7-C8   | 1.458(2) |
| C8-C9   | 1.378(2) | C8-C12  | 1.453(2) |
| C9-C13  | 1.470(3) | C10-C14 | 1.380(3) |
| C10-C12 | 1.398(2) | C12-C17 | 1.410(2) |
| C13-C18 | 1.497(3) | C14-C15 | 1.375(3) |
| C15-C16 | 1.391(3) | C16-C17 | 1.378(3) |
| C19-C20 | 1.449(3) | C20-C21 | 1.160(3) |

Table 5. Bond angles (°) for **23**.

|           |            |            |            |
|-----------|------------|------------|------------|
| C10-O1-C9 | 106.01(13) | C17-O3-C19 | 117.03(14) |
| C2-C1-C11 | 120.6(2)   | C3-C2-C1   | 120.5(2)   |

|             |            |             |            |
|-------------|------------|-------------|------------|
| C4-C3-C2    | 119.8(2)   | C3-C4-C5    | 120.5(2)   |
| C11-C5-C4   | 121.2(2)   | C7-C6-C11   | 125.67(19) |
| C6-C7-C8    | 130.65(19) | C9-C8-C12   | 105.13(15) |
| C9-C8-C7    | 121.49(16) | C12-C8-C7   | 133.36(16) |
| C8-C9-O1    | 111.99(15) | C8-C9-C13   | 133.99(16) |
| O1-C9-C13   | 114.01(15) | O1-C10-C14  | 122.83(17) |
| O1-C10-C12  | 111.10(15) | C14-C10-C12 | 126.07(17) |
| C5-C11-C1   | 117.47(19) | C5-C11-C6   | 119.1(2)   |
| C1-C11-C6   | 123.47(19) | C10-C12-C17 | 115.98(15) |
| C10-C12-C8  | 105.75(15) | C17-C12-C8  | 138.27(16) |
| O2-C13-C9   | 120.93(17) | O2-C13-C18  | 121.86(17) |
| C9-C13-C18  | 117.21(16) | C15-C14-C10 | 115.27(18) |
| C14-C15-C16 | 121.95(19) | C17-C16-C15 | 121.22(18) |
| O3-C17-C16  | 123.41(16) | O3-C17-C12  | 117.10(15) |
| C16-C17-C12 | 119.48(16) | O3-C19-C20  | 107.68(16) |
| C21-C20-C19 | 176.1(3)   |             |            |

Table 6. Anisotropic atomic displacement parameters ( $\text{\AA}^2$ ) for compound **23**.

The anisotropic atomic displacement factor exponent takes the form:  $-2\pi^2 [h^2 a^{*2} U_{11} + \dots + 2 h k a^* b^* U_{12}]$

|    | $U_{11}$   | $U_{22}$   | $U_{33}$   | $U_{23}$   | $U_{13}$   | $U_{12}$   |
|----|------------|------------|------------|------------|------------|------------|
| O1 | 0.0746(9)  | 0.0298(7)  | 0.0404(7)  | 0.0001(5)  | 0.0093(6)  | -0.0021(6) |
| O2 | 0.1106(13) | 0.0347(8)  | 0.0548(9)  | -0.0059(6) | 0.0114(8)  | 0.0001(8)  |
| O3 | 0.0794(10) | 0.0312(7)  | 0.0427(7)  | 0.0043(5)  | 0.0101(6)  | 0.0033(6)  |
| C1 | 0.0676(14) | 0.0556(13) | 0.0496(11) | 0.0030(10) | 0.0074(10) | 0.0069(10) |
| C2 | 0.0708(15) | 0.0549(13) | 0.0668(15) | 0.0151(11) | 0.0108(11) | 0.0022(11) |
| C3 | 0.0716(15) | 0.0842(18) | 0.0445(12) | 0.0124(11) | 0.0106(10) | 0.0030(13) |
| C4 | 0.0862(17) | 0.0832(19) | 0.0493(13) | 0.0124(12) | 0.0064(12) | 0.0031(14) |

|     | <b>U<sub>11</sub></b> | <b>U<sub>22</sub></b> | <b>U<sub>33</sub></b> | <b>U<sub>23</sub></b> | <b>U<sub>13</sub></b> | <b>U<sub>12</sub></b> |
|-----|-----------------------|-----------------------|-----------------------|-----------------------|-----------------------|-----------------------|
| C5  | 0.0748(15)            | 0.0540(13)            | 0.0609(13)            | 0.0031(11)            | 0.0011(11)            | 0.0063(11)            |
| C6  | 0.0615(13)            | 0.0431(11)            | 0.0503(11)            | -0.0033(9)            | 0.0025(9)             | 0.0021(9)             |
| C7  | 0.0584(12)            | 0.0449(11)            | 0.0434(10)            | -0.0017(8)            | 0.0040(9)             | -0.0011(9)            |
| C8  | 0.0461(10)            | 0.0327(9)             | 0.0405(9)             | -0.0018(7)            | 0.0014(7)             | -0.0009(7)            |
| C9  | 0.0561(11)            | 0.0341(9)             | 0.0380(9)             | -0.0027(7)            | 0.0051(8)             | 0.0002(8)             |
| C10 | 0.0621(12)            | 0.0305(9)             | 0.0427(10)            | 0.0006(7)             | 0.0053(8)             | -0.0041(8)            |
| C11 | 0.0482(11)            | 0.0539(12)            | 0.0449(10)            | -0.0095(9)            | 0.0021(8)             | -0.0035(9)            |
| C12 | 0.0464(10)            | 0.0310(9)             | 0.0396(9)             | -0.0008(7)            | 0.0011(7)             | -0.0026(7)            |
| C13 | 0.0575(12)            | 0.0334(9)             | 0.0491(11)            | 0.0000(8)             | 0.0045(9)             | -0.0004(8)            |
| C14 | 0.1024(18)            | 0.0387(11)            | 0.0447(11)            | -0.0039(9)            | 0.0161(11)            | 0.0035(11)            |
| C15 | 0.1067(18)            | 0.0367(11)            | 0.0487(12)            | -0.0083(9)            | 0.0143(11)            | 0.0003(11)            |
| C16 | 0.0798(14)            | 0.0312(10)            | 0.0506(11)            | -0.0008(8)            | 0.0046(10)            | -0.0031(9)            |
| C17 | 0.0527(11)            | 0.0342(9)             | 0.0392(9)             | 0.0004(7)             | 0.0021(8)             | -0.0022(8)            |
| C18 | 0.0735(14)            | 0.0362(10)            | 0.0558(12)            | 0.0084(9)             | 0.0036(10)            | 0.0026(9)             |
| C19 | 0.0691(13)            | 0.0339(10)            | 0.0506(11)            | 0.0085(8)             | 0.0029(9)             | 0.0011(9)             |
| C20 | 0.1013(18)            | 0.0404(11)            | 0.0546(13)            | 0.0103(10)            | 0.0102(12)            | 0.0043(11)            |
| C21 | 0.212(4)              | 0.0624(17)            | 0.0546(16)            | 0.0123(13)            | 0.0290(19)            | 0.014(2)              |

Table 7. Hydrogen atomic coordinates and isotropic atomic displacement parameters ( $\text{\AA}^2$ ) for compound **23**.

|    | <b>x/a</b> | <b>y/b</b> | <b>z/c</b> | <b>U(eq)</b> |
|----|------------|------------|------------|--------------|
| H1 | 0.6994     | 0.1967     | 0.5106     | 0.069000     |
| H2 | 0.7593     | 0.1131     | 0.3757     | 0.077000     |
| H3 | 0.7821     | 0.2518     | 0.2572     | 0.080000     |
| H4 | 0.7484     | 0.4752     | 0.2730     | 0.087000     |
| H5 | 0.6871     | 0.5615     | 0.4065     | 0.076000     |



|      | <b>x/a</b> | <b>y/b</b> | <b>z/c</b> | <b>U(eq)</b> |
|------|------------|------------|------------|--------------|
| H6   | 0.6230     | 0.5397     | 0.5573     | 0.062000     |
| H7   | 0.6590     | 0.2988     | 0.6314     | 0.059000     |
| H14  | 0.4912     | 0.6286     | 0.9619     | 0.074000     |
| H15  | 0.4934     | 0.8453     | 0.9084     | 0.077000     |
| H16  | 0.5510     | 0.8904     | 0.7655     | 0.065000     |
| H18A | 0.6306     | 0.2016     | 0.9293     | 0.083000     |
| H18B | 0.6043     | 0.0596     | 0.8909     | 0.083000     |
| H18C | 0.4903     | 0.1560     | 0.9108     | 0.083000     |
| H19A | 0.6679     | 0.9129     | 0.6358     | 0.061000     |
| H19B | 0.5200     | 0.8943     | 0.6234     | 0.061000     |
| H21  | 0.6324     | 0.8527     | 0.3772     | 0.132000     |
